# Supplementary material for: A [Pd]-mediated ω-alkynone cycloisomerization approach for the central tetrahydropyran unit and the synthesis of C(31)–C(48) fragment of aflastatin A
Source: Royal Society of Chemistry journal article supplement (doi:10.1039/c1ob05251a), 2011-01-01

## Electronic Supporting Information

### A Pd-Mediated $\omega$ -alkynone cycloisomerization approach for central tetrahydropyran and synthesis of C(31)–C(48) fragment of Aflastatin A

Sachin B. Narute, Neela Chandra Kiran and C.V. Ramana\*

National Chemical Laboratory, Dr. Homi Bhabha Road, Pune – 411 008, India.

E-mail: vr.chepuri@ncl.res.in

\*Corresponding author. Tel.: +91-20-25902577; fax: +91-20-25902629.

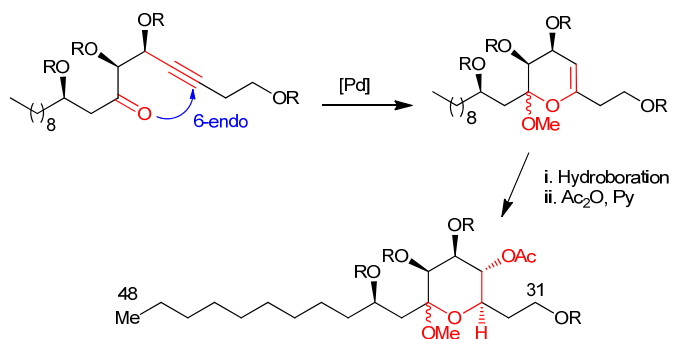

**Table of Contents:**

| S. No. | Description                                                     | Page    |
|--------|-----------------------------------------------------------------|---------|
| 1      | <b>General</b>                                                  | S4      |
| 2      | <b>Alkyne 10</b><br><i>Synthesis and Spectral Data</i>          | S4–S5   |
| 3      | <b>Alcohol 11</b><br><i>Synthesis and Spectral Data</i>         | S5–S6   |
| 4      | <b>Benzyl ether 11-Bn</b><br><i>Synthesis and Spectral Data</i> | S6–S7   |
| 5      | <b>Alcohol 12</b><br><i>Synthesis and Spectral Data</i>         | S7      |
| 6      | <b>Olefin 7</b><br><i>Synthesis and Spectral Data</i>           | S7–S8   |
| 7      | <b>Ketone 16</b><br><i>Synthesis and Spectral Data</i>          | S8–S9   |
| 8      | <b>Alcohol 17</b><br><i>Synthesis and Spectral Data</i>         | S9–S10  |
| 9      | <b>Diol 19</b><br><i>Synthesis and Spectral Data</i>            | S10–S11 |
| 10     | <b>Acetonide 20</b><br><i>Synthesis and Spectral Data</i>       | S11–S12 |
| 11     | <b>Benzyl ether 18</b><br><i>Synthesis and Spectral Data</i>    | S12     |
| 12     | <b>Alkyne 21</b><br><i>Spectral Data</i>                        | S13     |

|    |                                                |          |
|----|------------------------------------------------|----------|
| 13 | <b>TBS ether 5</b><br><i>Spectral Data</i>     | S13–S14  |
| 14 | <b>Alcohol 22</b><br><i>Spectral Data</i>      | S14–S15  |
| 15 | <b>Benzyl ether 23</b><br><i>Spectral Data</i> | S15–S16  |
| 16 | <b>Alcohol 24</b><br><i>Spectral Data</i>      | S16–S17  |
| 17 | <i>Spectra of all the new compounds</i>        | S18–S137 |

## Experimental Section

### 1. General

Air and/or moisture sensitive reactions were carried out in anhydrous solvents under an atmosphere of argon in oven-dried glassware. All anhydrous solvents were distilled prior to use: dichloromethane and DMF from CaH<sub>2</sub>; methanol from Mg cake; THF on Na/benzophenone; triethylamine and pyridine over KOH; acetic anhydride from sodium acetate. Commercial reagents were used without purification. Column chromatography was carried out by using spectrochem silica gel (230–400 mesh). Optical rotations were determined on a Jasco DIP-370 digital polarimeter. Specific optical rotations  $[\alpha]_D$  are given in  $10^{-1} \times \text{deg} \times \text{cm}^2 \times \text{g}^{-1}$ . <sup>1</sup>H and <sup>13</sup>C NMR spectroscopy measurements were carried out on Bruker AC 200 MHz or Bruker DRX 400 MHz spectrometers, and TMS was used as an internal standard. <sup>1</sup>H and <sup>13</sup>C NMR chemical shifts are reported in ppm downfield from Chloroform-d ( $\delta = 7.25$ ) or TMS and coupling constants (*J*) are reported in Hertz (Hz). The following abbreviations are used to designate signal multiplicity: s = singlet, d = doublet, t = triplet, q = quartet, m = multiplet, b = broad. The Multiplicity of <sup>13</sup>C NMR signals was assigned with the help of DEPT spectra and the abbreviations used: s = singlet d = doublet t = triplet q = quartet, represent C (quaternary), CH, CH<sub>2</sub> and CH<sub>3</sub> respectively. Mass spectroscopy was carried out on PI QStar Pulsar (Hybrid Quadrupole-TOF LC/MS/MS) and 4800 plus MALDI TOF/TOF Applied Biosystem spectrometer. Elemental analysis data were obtained on a Thermo Finnigan Flash EA 1112 Series CHNS Analyzer.

### 2. Synthesis of alkyne 10:

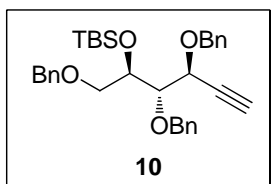

To an ice-cooled solution of alcohol **9** (200 mg, 0.48 mmol) and imidazole (186 mg, 2.9 mmol) in anhydrous DMF (2 mL) was added TBSCl (216 mg, 1.44 mmol) and stirred at room temperature for 4 h. Then reaction mixture was diluted with ethyl acetate (20 mL) and washed with water (3 × 5 mL),

brine (5 mL), dried over sodium sulphate and evaporated under reduced pressure. The crude was

purified by column chromatography (5:95 ethyl acetate/petroleum ether) to afford compound **10** (210 mg, 82% yield) as a colorless oil.  $[\alpha]_D^{25} +21.1$  ( $c$  0.8,  $\text{CHCl}_3$ ); IR ( $\text{CHCl}_3$ ):  $\tilde{\nu}$  3297, 2917, 2838, 2137, 1642, 1453, 1071, 756, 652  $\text{cm}^{-1}$ ;  $^1\text{H}$  NMR ( $\text{CDCl}_3$ , 400 MHz):  $\delta$  -0.08 (s, 6H), 0.71 (s, 9H), 2.42 (d,  $J = 2.2$  Hz, 1H), 3.43 (dd,  $J = 10.0, 4.4$  Hz, 1H), 3.50 (dd,  $J = 10.0, 2.2$  Hz, 1H), 3.74 (dd,  $J = 7.1, 3.7$  Hz, 1H), 3.86–3.93 (m, 1H), 4.33 (s, 2H), 4.41 (dd,  $J = 3.7, 2.1$  Hz, 1H), 4.45 (d,  $J = 12.1$  Hz, 1H), 4.58 (d,  $J = 11.4$  Hz, 1H), 4.80 (d,  $J = 12.1$  Hz, 1H), 4.85 (d,  $J = 11.4$  Hz, 1H), 7.14–7.28 (m, 15H);  $^{13}\text{C}$  NMR ( $\text{CDCl}_3$ , 100 MHz):  $\delta$  -5.1 (q), -4.3 (q), 18.0 (s), 25.84 (q, 3C), 70.8 (d), 70.9 (t), 71.8 (t), 72.1 (d), 73.2 (t), 74.4 (t), 75.6 (d), 80.3 (s), 81.0 (d), 127.39 (d, 2C), 127.6 (d), 127.70 (d, 2C), 127.95 (d, 2C), 128.01 (d, 2C), 128.14 (d, 2C), 128.23 (d, 2C), 128.31 (d, 2C), 137.6 (s), 138.3 (s), 138.6 (s) ppm; ESI-MS ( $m/z$ ): 530.57 (68%  $[\text{M}]^+$ ), 532.63 (100%), 553.59 (45%,  $[\text{M}+\text{Na}]^+$ ), 569.54 (25%  $[\text{M}+\text{K}]^+$ ); Anal. Calcd for  $\text{C}_{33}\text{H}_{42}\text{O}_4\text{Si}$ : C, 74.68; H, 7.98; Found: C, 74.63; H, 8.05.

### 3. Synthesis of alcohol **11**:

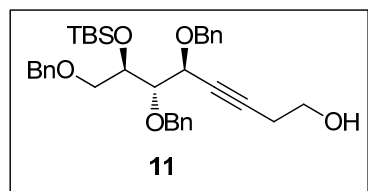

At  $-78$  °C, a solution of alkyne **10** (1.3 g, 2.45 mmol) in anhydrous THF (10 mL) was treated with  $n$ -BuLi (1.84 mL, 1.6 M in hexane, 2.94 mmol) and stirred for 20 minutes and then introduced a solution of  $\text{BF}_3 \cdot \text{Et}_2\text{O}$  (417 mg, 2.94 mmol) and stirred at  $-78$  °C for 20 minutes. To this, a solution of ethylene oxide (6.2 M) in anhydrous THF (3 mL) was added slowly at  $-78$  °C and the contents stirred for 1 h at the same temperature. Reaction mixture was quenched by adding saturated sodium bicarbonate (1 mL) and partitioned between ethyl acetate (80 mL) and water (20 mL). The organic layer was washed with brine (20 mL), dried over sodium sulphate and evaporated under reduced pressure. The crude was purified by column chromatography (silica 230–400 mesh, 1:4 ethyl acetate/petroleum ether) to afford compound **11** (1.18 g, 84% yield) as a colorless oil.  $[\alpha]_D^{25} +62.6$  ( $c$  1.0,  $\text{CHCl}_3$ ); IR ( $\text{CHCl}_3$ ):  $\tilde{\nu}$  3436, 3017, 2929, 2858, 2112, 1455, 1099  $\text{cm}^{-1}$ ;  $^1\text{H}$  NMR ( $\text{CDCl}_3$ , 400 MHz):  $\delta$  -0.02 (s, 6H), 0.77 (s, 9H), 1.99 (bs, 1H), 2.46 (dt,  $J = 1.6, 6.2$  Hz, 2H), 3.47 (dd,  $J = 4.9, 10.0$

Hz, 1H), 3.53 (dd,  $J = 2.8, 10.0$  Hz, 1H), 3.62 (t,  $J = 6.2$ , 1H), 3.79 (dd,  $J = 3.7, 7.0$  Hz, 1H), 3.8–83.95 (m, 1H), 4.40 (bs, 2H), 4.44–4.50 (m, 2H), 4.64 (d,  $J = 11.4$  Hz, 1H), 4.81 (d,  $J = 11.9$  Hz, 1H), 4.89 (d,  $J = 11.4$  Hz, 1H), 7.20–7.29 (m, 15H);  $^{13}\text{C}$  NMR ( $\text{CDCl}_3$ , 100 MHz):  $\delta$ –5.1 (q), –4.3 (q), 18.0 (s), 23.2 (t), 25.81 (q, 3C), 60.9 (t), 70.8 (t), 71.2 (d), 71.8 (t), 72.1 (d), 73.2 (t), 74.4 (t), 78.8 (s), 81.3 (d), 84.7 (s), 127.4 (d), 127.5 (d), 127.6 (d), 127.73 (d, 2C), 127.91 (d, 2C), 128.08 (d, 2C), 128.19 (d, 4C), 128.31 (d, 2C), 137.8 (s), 138.3 (s), 138.5 (s) ppm; MALDI TOF: 575.65 (100%  $[\text{M}+1]^+$ ), 597.30 (14%  $[\text{M}+\text{Na}]^+$ ); HRMS: 613.2752 ( $[\text{M}+\text{K}]^+$ ) calculated, 613.2789 ( $[\text{M}+\text{K}]^+$ ) observed; Anal. Calcd for  $\text{C}_{35}\text{H}_{46}\text{O}_5\text{Si}$ : C, 73.13; H, 8.07; Found: C, 73.35; H, 7.98.

#### 4. Synthesis of benzyl ether **11-Bn**:

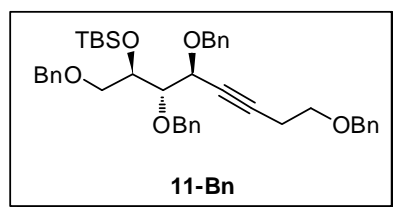

To a solution of alcohol **11** (540 mg, 0.94 mmol) in anhydrous DMF (5 mL), sodium hydride (60% oil suspension, 75 mg, 1.88 mmol) was added at 0 °C and allowed to stir for 10 minutes. To this cold reaction mixture benzyl bromide (192 mg, 1.13 mmol) was added slowly and stirred at room temperature for 2 h. The reaction mixture was partitioned between ethyl acetate (50 mL) and water (10 mL). Organic layer was washed with water ( $3 \times 10$  mL), brine, dried over sodium sulphate and evaporated under reduced pressure. The crude was purified by column chromatography (silica 230–400 mesh, 15:85 ethyl acetate/petroleum ether) to afford compound **11-Bn** (560 mg, 89% yield) as pale yellow oil.  $[\alpha]_{\text{D}}^{25} +30.1$  ( $c$  1.7,  $\text{CHCl}_3$ ); IR ( $\text{CHCl}_3$ ):  $\tilde{\nu}$  3017, 2928, 2858, 2136, 1455, 1101  $\text{cm}^{-1}$ ;  $^1\text{H}$  NMR ( $\text{CDCl}_3$ , 400 MHz):  $\delta$ –0.01 (s, 6H), 0.82 (s, 9H), 2.57–2.65 (m, 2H), 3.52 (dd,  $J = 5.2, 10.0$  Hz, 1H), 3.57–3.67 (m, 3H), 3.76–3.79 (m, 1H), 4.00–4.02 (m, 1H), 4.43–4.47 (m, 2H), 4.48–4.52 (m, 2H), 4.53–4.58 (m, 2H), 4.67 (d,  $J = 11.5$  Hz, 1H), 4.84 (d,  $J = 12.1$  Hz, 1H), 4.91 (d,  $J = 11.5$  Hz, 1H), 7.27–7.40 (m, 20H);  $^{13}\text{C}$  NMR ( $\text{CDCl}_3$ , 100 MHz):  $\delta$ –5.1 (q), –4.3 (q), 18.0 (s), 20.3 (t), 25.85 (q, 3C), 68.6 (t), 70.7 (t), 71.0 (d), 71.9 (t), 72.2 (d), 72.9 (t), 73.2 (t), 74.3 (t), 77.5 (s), 81.5 (d), 84.6 (s), 127.36 (d, 2C), 127.5 (d), 127.63 (d, 2C), 127.71 (d, 2C), 127.89 (d, 2C), 128.09 (d, 3C), 128.25 (d,

2C), 128.31 (d, 2C), 128.38 (d, 2C), 128.78 (d), 129.0 (d), 138.0 (s), 138.1 (s), 138.4 (s), 138.8 (s) ppm;  
LCMS ( $m/z$ ): 595.21 (35%), 687.39 (100%  $[M+Na]^+$ ); HRMS: 703.3221 ( $[M+K]^+$ ) calculated, 703.3202  
( $[M+K]^+$ ) observed; Anal. Calcd for  $C_{42}H_{52}O_5Si$ : C, 75.86; H, 7.88; Found: C, 75.63; H, 7.98.

## 5. Synthesis of alcohol 12:

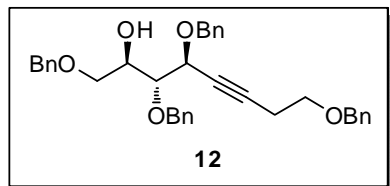

To a ice cooled solution of TBS ether **11-Bn** (560 mg, 0.84 mmol) in anhydrous THF (5 mL), was added a solution of TBAF (290 mg, 1.1 mmol) in anhydrous THF (1 mL) under argon atmosphere and allowed

to stir at room temperature for 4 h. Reaction mixture was concentrated and residue was purified by column chromatography (silica 230–400 mesh, 2:8 ethyl acetate/petroleum ether) to afford compound **12** (392 mg, 84% yield) as a colorless oil.  $[\alpha]_D^{25} +65.5$  ( $c$  1.0,  $CHCl_3$ ); IR ( $CHCl_3$ ):  $\tilde{\nu}$  3445, 3030, 2864, 2111, 1496, 1099  $cm^{-1}$ ;  $^1H$  NMR ( $CDCl_3$ , 400 MHz):  $\delta$  2.57 (dt,  $J = 1.7, 7.0$  Hz, 2H), 2.67 (bs, 1H), 3.53–3.63 (m, 4H), 3.74 (dd,  $J = 3.5, 7.0$  Hz, 1H), 3.93 (bs, 1H), 4.42–4.46 (m, 2H), 4.48–4.50 (m, 4H), 4.59 (d,  $J = 11.4$  Hz, 1H), 4.85 (d,  $J = 11.4$  Hz, 1H), 4.87 (d,  $J = 11.4$  Hz, 1H), 7.20–7.32 (m, 20H);  $^{13}C$  NMR ( $CDCl_3$ , 100 MHz):  $\delta$  20.3 (t), 68.4 (t), 70.80 (t, 2C), 70.81 (d), 71.3 (d), 72.9 (t), 73.3 (t), 74.0 (t), 77.1 (s), 80.4 (d), 85.1 (s), 127.5 (d), 127.60 (d, 3C), 127.68 (d, 2C), 127.82 (d, 2C), 127.87 (d, 2C), 128.13 (d, 2C), 128.18 (d, 2C), 128.35 (d, 2C), 128.38 (d, 4C), 137.8 (s), 137.9 (s), 138.0 (s), 138.4 (s) ppm; MALDI TOF: 573.16 (100%  $[M+Na]^+$ ); HRMS: 589.2356 ( $[M+K]^+$ ) calculated, 589.2347 ( $[M+K]^+$ ) observed; Anal. Calcd for  $C_{36}H_{38}O_5$ : C, 78.52; H, 6.96; Found: C, 78.33; H, 6.91.

## 6. Synthesis of olefin 7(Z):

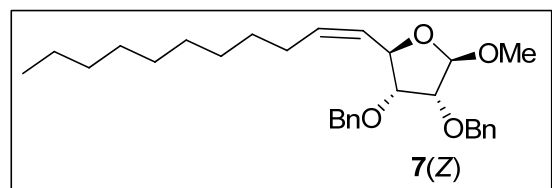

At  $-78$  °C, a solution of DMSO (11.34 g, 145.2 mmol) in  $CH_2Cl_2$  (55 mL) was treated with oxallyl chloride (11.06 g, 87.1 mmol) and stirred for 15 min. To this were added a solution of alcohol **8** (10 g, 29 mmol) in  $CH_2Cl_2$  (25 mL)

and Et<sub>3</sub>N (29.38 g, 290.4 mmol) after 15 min. The contents were stirred at -78 °C for another 15 minutes, and diluted with saturated NH<sub>4</sub>Cl solution (50 mL). Two layers were separated and the aqueous layer was extracted with DCM (3 × 150 mL), dried over Na<sub>2</sub>SO<sub>4</sub>, volatiles were removed and the crude was directly used for next reaction without purification.

*n*-BuLi (72.6 mL, 116.1 mmol) was added to an ice cooled solution of decyl triphenylphosphonium bromide (70.2 g, 145.1 mmol) in anhydrous THF (350 mL) and stirred at rt for 1 h. This ylide was transferred to a stirred solution of aldehyde (9.94 g, 29 mmol) in THF (100 mL) at 0 °C and stirred at room temperature for 2 h. The reaction mixture was quenched with sat NH<sub>4</sub>Cl solution (20 mL); THF was removed and the aqueous layer was extracted with ethyl acetate (3 × 70 mL), combined organic layers were dried over Na<sub>2</sub>SO<sub>4</sub>, volatiles were removed and the crude was purified by column chromatography (silica 230–400 mesh, 5:95 ethyl acetate/petroleum ether) to provide the olefin **7(Z)** (10.43 g, 77% yield) as a pale yellow oil.  $[\alpha]_D^{25} -10.9$  (*c* 1.6, CHCl<sub>3</sub>); IR (CHCl<sub>3</sub>):  $\tilde{\nu}$  3064, 2954, 2854, 1715, 1606, 1465, 1455, 1145, 1046, 734, 697 cm<sup>-1</sup>; <sup>1</sup>H NMR (CDCl<sub>3</sub>, 200 MHz):  $\delta$  0.88 (t, *J* = 6.6 Hz, 3H), 1.24 (bs, 14H), 2.00–2.21 (m, 2H), 3.32 (s, 3H), 3.82–3.91 (m, 2H), 4.51 (d, *J* = 12.2 Hz, 1H), 4.58 (d, *J* = 12.2 Hz, 1H), 4.66 (d, *J* = 12.3 Hz, 1H), 4.74 (d, *J* = 12.3 Hz, 1H), 4.87 (s, 1H), 4.94 (ddd, *J* = 0.8, 7.1, 9.1 Hz, 1H), 5.35 (dt, *J* = 10.8, 9.3 Hz, 1H), 5.69 (ddd, *J* = 10.8, 6.4, 7.3 Hz, 1H), 7.30–7.40 (m, 10H); <sup>13</sup>C NMR (CDCl<sub>3</sub>, 50 MHz):  $\delta$  14.1 (q), 22.6 (t), 27.7 (t), 29.30 (t, 2C), 29.54 (t, 2C), 29.8 (t), 31.9 (t), 54.9 (q), 72.3 (t), 72.4 (t), 76.9 (d), 80.0 (d), 82.7 (d), 106.1 (d), 127.52 (d, 2C), 127.6 (d), 127.8 (d), 128.02 (d, 2C), 128.26 (d, 2C), 128.37 (d, 2C), 129.5 (d), 135.0 (d), 137.8 (s), 137.9 (s), ppm; MALDI-TOF: 489.21 (68% [M+Na]<sup>+</sup>), 505.18 (100% [M+K]<sup>+</sup>); Anal. Calcd for C<sub>30</sub>H<sub>42</sub>O<sub>4</sub>: C, 77.21; H, 9.07; Found: C, 77.49; H, 9.32.



## 7. Synthesis of ketone 16:

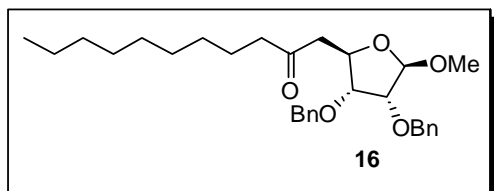

A solution of PdCl<sub>2</sub> (5 mg, 0.03 mmol) in N,N dimethyl acetamide (20 mL) and water (3 mL) was stirred at room temperature for 1 h under O<sub>2</sub> atmosphere (12 bar). Then to this, a solution of olefin **7** (1 g, 2.1 mmol) in N,N dimethyl acetamide (10 mL) was added and stirring was continued for 12 h at 90 °C under O<sub>2</sub> atmosphere (4 bar). Reaction mixture was cooled and partitioned between diethyl ether (2 × 50 mL) and water (30 mL). Combined organic phase was washed with brine (20 mL), dried and concentrated under reduced pressure. Crude compound was purified by column chromatography (silica 230–400 mesh, 2:8 ethyl acetate/petroleum ether) to procure compound **16** [720 mg, 76% yield based on **7** recovered (78 mg)] as a colorless oil. [ $\alpha$ ]<sub>D</sub><sup>25</sup> +14.5 (*c* 0.7 in CHCl<sub>3</sub>); IR (neat)  $\tilde{\nu}$  2926, 2855, 1714, 1455, 1046, 736, 698 cm<sup>-1</sup>; <sup>1</sup>H NMR (500 MHz, CDCl<sub>3</sub>)  $\delta$  0.87 (t, *J* = 6.5 Hz, 3H), 1.24 (bs, 12H), 1.51–1.58 (m, 2H), 2.44 (t, *J* = 7.4 Hz, 2H), 2.62 (d, *J* = 6.7 Hz, 2H), 3.30 (s, 3H), 3.79–3.88 (m, 2H), 4.46 (d, *J* = 11.8 Hz, 1H), 4.53–4.59 (m, 3H), 4.68 (d, *J* = 12.1 Hz, 1H), 4.88 (s, 1H), 7.30–7.36 (m, 10H); <sup>13</sup>C NMR (125 MHz, CDCl<sub>3</sub>)  $\delta$  14.1 (q), 22.6 (t), 23.5 (t), 29.1 (t), 29.2 (t), 29.37 (t, 2C), 31.8 (t), 43.1 (t), 48.3 (t), 55.1 (q), 72.2 (t), 72.4 (t), 77.2 (d), 79.3 (d), 81.3 (d), 106.4 (d), 127.82 (d, 2C), 127.91 (d, 2C), 128.97 (d, 2C), 128.38 (d, 4C), 137.59 (s, 2C), 208.7 (s); MALDI-TOF: 505.20 (17% [M+Na]<sup>+</sup>), 521.17 (10% [M+K]<sup>+</sup>); HRMS: 521.2669 ([M+K]<sup>+</sup>) calculated, 521.2703 ([M+K]<sup>+</sup>) observed; Anal. calcd for C<sub>30</sub>H<sub>42</sub>O<sub>5</sub>; C, 74.65, H, 8.77; Found C, 74.59, H, 8.83.

## 8. Synthesis of alcohol 17:

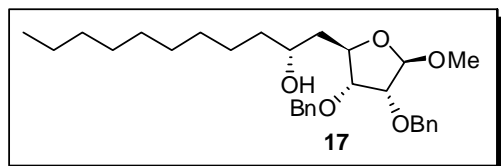

LiI (2.77 g, 20.7 mmol) was added to a solution of ketone **16** (1g, 2.1 mmol) in diethyl ether (40 mL) at –40 °C and stirred for 10 min. Then reaction mixture was cooled to –100 °C and LAH (785 mg, 20.7 mmol) was introduced in three portions. Stirring was continued for next 45 min at the same temperature. Reaction mixture was quenched by 10% sodium potassium tartarate (5 mL) at –

100 °C and allowed to warm to room temperature. Organic phase was separated and aqueous layer was extracted with diethyl ether (2 × 10 mL). Combined organic phase was washed with brine (25 mL), dried and concentrated under reduced pressure. The resulting crude compound (9:1 dr) was purified by column chromatography (silica 100–200 mesh, 2:8 ethyl acetate/petroleum ether) to procure compound **17** (898 mg, 89% yield) as a colorless oil.  $[\alpha]_D^{25} +26.5$  (*c* 1.2 in CHCl<sub>3</sub>); IR (neat)  $\tilde{\nu}$  3479, 3016, 2928, 2856, 1455, 1216, 1045, 756, 698 cm<sup>-1</sup>; <sup>1</sup>H NMR (200 MHz, CDCl<sub>3</sub>)  $\delta$  0.82 (t, *J* = 6.5 Hz, 3H), 1.20 (bs, 14H), 1.33–1.36 (m, 2H), 1.45–1.53 (m, 1H), 1.67–1.77 (m, 1H), 3.26 (s, 3H), 3.71–3.73 (m, 1H), 3.76–3.78 (m, 1H), 3.79–3.82 (m, 1H), 4.20–4.26 (m, 1H), 4.37 (d, *J* = 11.7 Hz, 1H), 4.52 (d, *J* = 11.7 Hz, 1H), 4.54 (d, *J* = 12.1 Hz, 1H), 4.63 (d, *J* = 12.0 Hz, 1H), 4.84 (s, 1H), 7.19–7.32 (m, 10H); <sup>13</sup>C NMR (50 MHz, CDCl<sub>3</sub>):  $\delta$  14.1 (q), 22.6 (t), 25.5 (t), 29.3 (t), 29.51 (t), 29.58 (t), 29.63 (t), 31.9 (t), 37.3 (t), 41.9 (t), 55.2 (q), 71.2 (d), 72.3 (t), 72.6 (t), 78.7 (d), 80.9 (d), 82.2 (d), 106.3 (d), 127.95 (d, 4C), 128.02 (d, 2C), 128.43 (d, 4C), 137.4 (s), 137.5 (s) ppm; MALDI-TOF: 507.23 (33% [M+Na]<sup>+</sup>), 523.20 (100% [M+K]<sup>+</sup>); HRMS: 507.3086 ([M+Na]<sup>+</sup>) calculated, 507.3083 ([M+K]<sup>+</sup>) observed; Anal. calcd for C<sub>30</sub>H<sub>44</sub>O<sub>5</sub>; C, 74.34, H, 9.15; Found C, 74.45, H, 9.21.

## 9. Synthesis of diol **19**:

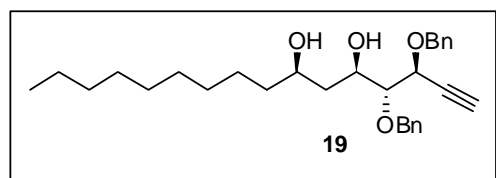

To a solution of alcohol **17** (100 mg, 0.21 mmol) in dioxane (5 mL) and water (2 mL) was added conc. H<sub>2</sub>SO<sub>4</sub> (100 μL) at room temperature and stirred at reflux in water bath for 6 h.

After complete consumption of starting material as indicated by TLC, the reaction mixture was cooled in ice bath and neutralized with triethyl amine. Dioxane was removed under vacuum and residual material was extracted with ethyl acetate (3 × 5 mL). The combined organic layer was washed with water (5 mL), brine (5 mL), dried over sodium sulphate and concentrated under reduced pressure. The crude product (92 mg, 0.19 mmol) was dissolved in anhydrous methanol (4 mL) and treated with K<sub>2</sub>CO<sub>3</sub> (80 mg, 0.58 mmol) followed by a solution of dimethyl 1-diazo-2-oxopropyl phosphonate (110 mg, 0.58

mmol) in methanol (1 mL). After stirring for 7 h, the reaction mixture was filtered through celite bed and filtrate was concentrated. The residue was extracted with ethyl acetate (20 mL) and water (5 mL). Organic layer washed with brine (5 mL), dried over sodium sulphate and concentrated under reduced pressure. The residue was purified by column chromatography (silica 230–400 mesh, 15:85 ethyl acetate/petroleum ether) to procure compound **19** (55 mg, 58% yield over two steps) as colorless oil.  $[\alpha]_D^{25} +48.2$  (*c* 0.4 in  $\text{CHCl}_3$ ); IR (neat)  $\tilde{\nu}$  3431, 3016, 2927, 2856, 2114, 1629, 1455, 1216, 1085, 624  $\text{cm}^{-1}$ ;  $^1\text{H}$  NMR (400 MHz,  $\text{CDCl}_3$ )  $\delta$  0.87 (t, *J* = 6.5 Hz, 3H), 1.25 (bs, 14H), 1.34–1.43 (m, 3H), 1.80–1.83 (m, 1H), 2.59 (d, *J* = 2.1 Hz, 1H), 3.57 (dd, *J* = 4.7, 6.6 Hz, 1H), 3.78–3.82 (m, 1H), 3.98–4.02 (m, 1H), 4.43 (dd, *J* = 2.1, 4.7 Hz, 1H), 4.54 (d, *J* = 11.5 Hz, 1H), 4.65 (d, *J* = 11.2 Hz, 1H), 4.90 (d, *J* = 11.5 Hz, 1H), 4.92 (d, *J* = 11.2 Hz, 1H), 7.28–7.35 (m, 10H);  $^{13}\text{C}$  NMR (100 MHz,  $\text{CDCl}_3$ ) 14.1 (q), 22.7 (t), 25.3 (t), 29.3 (t), 29.5 (t), 29.59 (t, 2C), 31.9 (t), 38.2 (t), 38.4 (t), 70.4 (d), 71.0 (t), 73.0 (d), 73.3 (d), 74.4 (t), 75.8 (d), 80.3 (s), 82.8 (d), 127.8 (d), 127.9 (d), 128.08 (d, 2C), 128.34 (d, 2C), 128.42 (d, 2C), 128.48 (d, 2C), 137.2 (s), 137.9 (s); MALDI-TOF: 489.21 (17%  $[\text{M}+\text{Na}]^+$ ), 505.18 (100%  $[\text{M}+\text{K}]^+$ ), 997.43 (20%); HRMS: 505.2720 ( $[\text{M}+\text{K}]^+$ ) calculated, 505.2705 ( $[\text{M}+\text{K}]^+$ ) observed; Anal. calcd for  $\text{C}_{30}\text{H}_{42}\text{O}_4$ ; C, 77.21, H, 9.07; Found C, 76.93, H, 9.18.

## 10. Synthesis of acetonide **20**:

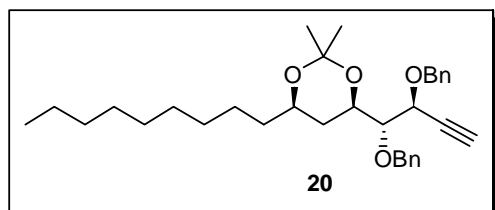

At 0 °C, to a solution of diol **19** (32 mg, 0.06 mmol) in 2,2-dimethoxy propane (1 mL) was added *p*-TSA (2 mg) and stirred at 0 °C for 20 min. The reaction mixture was warmed to room temperature and stirring was continued for next 2 h. The

reaction mixture was neutralized with triethyl amine and concentrated. Residual material was purified by column chromatography (silica 230–400 mesh, 1:9 ethyl acetate/petroleum ether) to procure compound **20** (30 mg, 88% yield) as a colorless oil.  $[\alpha]_D^{25} +50.9$  (*c* 0.5 in  $\text{CHCl}_3$ ); IR ( $\text{CHCl}_3$ )  $\tilde{\nu}$  3306, 3018, 2928, 2857, 2131, 1216, 1110, 758, 621  $\text{cm}^{-1}$ ;  $^1\text{H}$  NMR (500 MHz,  $\text{CDCl}_3$ )  $\delta$  0.88 (t, *J* = 6.9 Hz,

3H), 1.26 (bs, 12H), 1.28–1.32 (m, 4H), 1.34 (s, 3H), 1.39 (s, 3H), 1.44–1.47 (m, 1H), 1.65 (dt,  $J = 2.4$ , 12.9 Hz, 1H), 2.52 (d,  $J = 2.1$  Hz, 1H), 3.63 (dd,  $J = 3.4$ , 7.3 Hz, 1H), 3.70–3.75 (m, 1H), 4.01 (ddd,  $J = 2.4$ , 7.4, 11.6 Hz, 1H). 4.47–4.49 (m, 1H), 4.52 (d,  $J = 11.7$  Hz, 1H), 4.71 (d,  $J = 11.5$  Hz, 1H), 4.90 (d,  $J = 11.7$  Hz, 1H), 4.94 (d,  $J = 11.4$  Hz, 1H), 7.26–7.37 (m, 10H);  $^{13}\text{C}$  NMR (125 MHz,  $\text{CDCl}_3$ ):  $\delta$  14.1 (q), 19.6 (q), 22.7 (t), 24.8 (t), 29.3 (t), 29.54 (t, 3C), 30.1 (q), 31.9 (t), 33.0 (t), 36.4 (t), 68.8 (d), 68.9 (d), 70.8 (d), 71.1 (t), 74.5 (t), 75.3 (d), 79.9 (s), 82.1 (d), 98.5 (s), 127.5 (d), 127.6 (d), 127.79 (d, 2C), 128.18 (d, 2C), 128.31 (d, 2C), 128.49 (d, 2C), 137.8 (s), 138.4 (s) ppm; MALDI-TOF: 529.24 (18%  $[\text{M}+\text{Na}]^+$ ), 545.21 (100%  $[\text{M}+\text{K}]^+$ ); HRMS: 529.3294 ( $[\text{M}+\text{Na}]^+$ ) calculated, 529.3257 ( $[\text{M}+\text{Na}]^+$ ) observed; Anal. calcd for  $\text{C}_{33}\text{H}_{46}\text{O}_4$ ; C, 78.22, H, 9.15; Found C, 78.31, H, 9.22.

### 11. Synthesis of benzyl ether **18**:

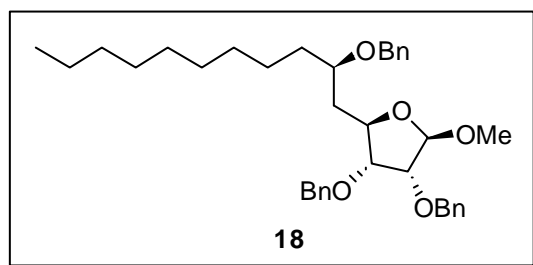

To an ice cooled solution of alcohol **17** (1.4 g, 2.89 mmol) in DMF (15 mL) was added NaH (0.084 g, 3.47 mmol) followed by benzyl bromide (0.3 mL, 3.18 mmol). The reaction mixture was warmed to room temperature and

stirred for 3 h. The reaction mixture was partitioned between water (50 mL) and ethyl acetate ( $3 \times 50$  mL). Organic layer washed with water ( $3 \times 30$  mL), brine (25 mL), dried over  $\text{Na}_2\text{SO}_4$ , concentrated and the crude was purified by column chromatography (silica 230–400 mesh, 1:9 ethyl acetate/petroleum ether) to afford compound **18** (1.58 g, 96% yield) as a colorless syrup.  $[\alpha]_{\text{D}}^{25} +21.3$  ( $c$  1.6,  $\text{CHCl}_3$ ); IR ( $\text{CHCl}_3$ ):  $\tilde{\nu}$  3019, 2927, 1653, 1454, 1215, 1045, 750, 669  $\text{cm}^{-1}$ ;  $^1\text{H}$  NMR ( $\text{CDCl}_3$ , 200 MHz):  $\delta$  0.88 (t,  $J = 6.82$  Hz, 3H), 1.25 (bs, 16H), 1.59 (m, 2H), 3.33 (s, 3H), 3.47(m, 1H), 3.84 (dd,  $J = 0.73$ , 4.54 Hz 1H), 4.03 (dd,  $J = 7.6$ , 4.5 Hz, 1H), 4.21(dd,  $J = 4.5$ , 7.6 Hz, 1H), 4.32 (d,  $J = 11.7$  Hz, 1H), 4.50 (d,  $J = 11.7$  Hz, 1H), 4.49–4.62 (m, 3H), 4.70 (d,  $J = 11.7$  Hz, 1H), 4.93 (s, 1H), 7.26–7.38 (m, 15H);  $^{13}\text{C}$  NMR ( $\text{CDCl}_3$ , 50 MHz):  $\delta$  14.1 (q), 22.7 (t), 25.5 (t), 29.3 (t), 29.62 (t, 3C), 29.8 (t), 30.6 (t), 31.9 (t), 54.9 (q), 72.2 (t), 72.27 (t), 72.3 (t), 77.9 (d), 79.3 (d), 79.7 (d), 82.7 (d), 105.5

(d), 127.3 (d), 127.65 (d, 2C), 127.8 (d), 127.84 (d), 128.07 (d, 2C), 128.11 (d, 2C), 128.23 (d, 2C), 128.31 (d, 2C), 128.40 (d, 2C), 137.6 (s), 137.7 (s), 139.0 (s) ppm; MALDI-TOF: 597.49 (27%  $[M+Na]^+$ ), 613.47 (100%  $[M+K]^+$ ); HRMS: 597.3556 ( $[M+Na]^+$ ) calculated, 597.3557 ( $[M+Na]^+$ ) observed; Anal. Calcd for  $C_{37}H_{50}O_5$ : C, 77.31; H, 8.77; Found: C, 77.38; H, 8.96.

## 12. Synthesis of alkyne **21**:

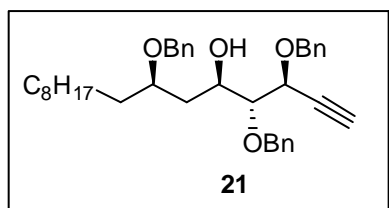

A solution of benzyl ether **18** (2.0 g, 3.5 mmol) in 4:1 mixture of dioxane/water (20 mL) was treated with  $H_2SO_4$  (2 mL) and stirred at reflux in water bath for 6 h. Reaction mixture was neutralized with

triethyl amine, dioxane removed under reduced pressure and residue was extracted with ethyl acetate (3  $\times$  40 mL). Combined organic layer dried over sodium sulphate, concentrated under reduced pressure. The crude was treated with  $K_2CO_3$  (1.4 g, 10.2 mmol) and Ohira-Bestmann reagent (1.0 g, 5.1 mmol) at room temperature for 14 h. Reaction mixture was filtered through celite and concentrated under reduced pressure. The residue obtained was purified by column chromatography (silica 230–400 mesh, 0.5:9.5 ethyl acetate/petroleum ether) to afford **21** (1.03 g, 53% yield) as colorless oil.  $[\alpha]_D^{25} +94.3$  ( $c$  1.6,  $CHCl_3$ ); IR ( $CHCl_3$ ):  $\tilde{\nu}$  3548, 3306, 3031, 2926, 2855, 2138, 1496, 1454, 1216, 1067, 757, 697, 614  $cm^{-1}$ ;  $^1H$  NMR ( $CDCl_3$ , 200 MHz):  $\delta$  0.88 (t,  $J = 6.7$  Hz, 3H), 1.25 (bs, 16H), 1.59–1.70 (m, 2H), 2.58 (d,  $J = 2.2$  Hz, 1H), 3.57 (dt,  $J = 1.1, 9.3$  Hz, 1H), 3.69 (dt,  $J = 1.1, 6.7$  Hz, 1H), 3.79 (dd,  $J = 2.2, 8.9$  Hz, 1H), 4.20 (d,  $J = 11.4$  Hz, 1H), 4.46–4.55 (m, 3H), 4.73 (t,  $J = 2.2$  Hz, 1H), 4.94 (d,  $J = 11.7$  Hz, 1H), 5.00 (d,  $J = 11.7$  Hz, 1H), 7.20–7.40 (m, 15H);  $^{13}C$  NMR ( $CDCl_3$ , 50 MHz):  $\delta$  14.1 (q), 22.7 (t), 25.5 (t), 29.3 (t), 29.5 (t), 29.58 (t, 2C), 29.8 (t), 30.8 (t), 31.9 (t), 71.2 (t), 71.9 (t), 72.1 (d), 72.2 (d), 73.5 (t), 76.2 (d), 76.7 (d), 79.6 (s), 80.2 (d), 127.6 (d), 127.65 (d, 2C), 127.72 (d, 2C), 127.79 (d, 2C), 128.24 (d, 2C), 128.32 (d, 6C), 137.8 (s), 138.4 (s), 138.4 (s) ppm; ESI-MS ( $m/z$ ): 579.43 (100%  $[M+Na]^+$ ); Anal. Calcd for  $C_{37}H_{48}O_4$ : C, 79.82; H, 8.69; Found: C, 79.60 H, 8.83.

### 13. Synthesis of TBS ether **5**:

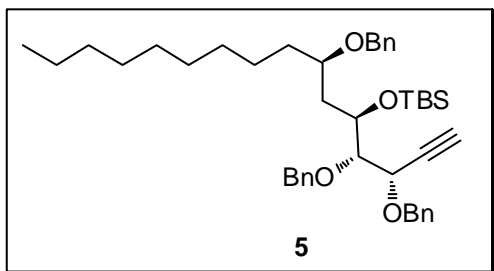

To an ice cooled solution of alkyne **21** (117 mg, 0.2 mmol) and Et<sub>3</sub>N (42 μL) in CH<sub>2</sub>Cl<sub>2</sub> (5 mL) was added TBSOTf (60 μL, 0.2 mmol) and stirred at room temperature for 2 h. Usual workup followed by purification (silica 230–400 mesh, 5:95

ethyl acetate/petroleum ether) gave the TBS ether **5** (0.132 g, 96% yield) as colorless thick oil.  $[\alpha]_D^{25} +52.6$  (*c* 1.0 in CHCl<sub>3</sub>); IR (neat)  $\tilde{\nu}$  3307, 2927, 2855, 2143, 1651, 1455, 1215, 1067, 757, 668, 618 cm<sup>-1</sup>; <sup>1</sup>H NMR (200 MHz, CDCl<sub>3</sub>)  $\delta$  0.00 (s, 3H), 0.03 (s, 3H), 0.82 (s, 9H), 0.87 (t, *J* = 6.6 Hz, 3H), 1.20–1.23 (m, 16H), 1.41–1.51 (m, 2H), 2.51 (d, *J* = 2.2 Hz, 1H), 3.49–3.67 (m, 1H), 3.83 (dd, *J* = 4.4, 5.4 Hz, 1H), 3.94 (dd, *J* = 4.4, 5.4 Hz, 1H), 4.32–4.39 (m, 1H), 4.49 (d, *J* = 11.6 Hz, 1H), 4.51 (d, *J* = 12.2 Hz, 1H), 4.53–4.56 (m, 1H), 4.66 (d, *J* = 11.4 Hz, 1H), 4.88 (d, *J* = 11.6 Hz, 1H), 4.93 (d, *J* = 11.3 Hz, 1H), 7.23–7.39 (m, 15H); <sup>13</sup>C NMR (50 MHz, CDCl<sub>3</sub>)  $\delta$  -4.3 (q), -4.2 (q), 14.1 (q), 18.2 (s), 22.7 (t), 25.9 (t), 26.04 (q, 3C), 29.3 (t), 29.5 (t), 29.60 (t, 2C), 29.7 (t), 30.4 (t), 31.9 (t), 70.8 (t), 71.0 (d), 71.8 (t), 73.7 (d), 73.8 (t), 75.6 (d), 80.0 (d), 80.8 (s), 81.2 (d), 127.1 (d), 127.3 (d), 127.44 (d, 2C), 127.6 (d), 127.93 (d, 2C), 128.06 (d, 6C), 128.31 (d, 2C), 137.7 (s), 138.7 (s), 139.2 (s) ppm; MALDI-TOF: 693.60 (85% [M+Na]<sup>+</sup>), 709.57 (100% [M+K]<sup>+</sup>); HRMS: 709.4054 ([M+K]<sup>+</sup>) calculated, 709.3989 ([M+K]<sup>+</sup>) observed; Anal. calcd for C<sub>43</sub>H<sub>62</sub>O<sub>4</sub>Si; C, 76.96, H, 9.31; Found C, 77.03, H, 9.42.

### 14. Synthesis of alcohol **22**:

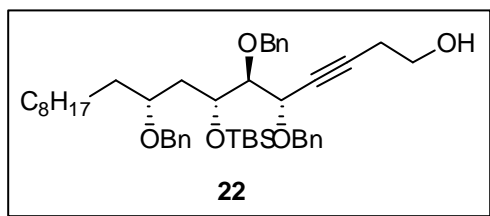

At -78 °C, a solution of alkyne **10** (0.5 g, 0.74 mmol) in anhydrous THF (5 mL) was treated with *n*-BuLi (0.56 mL, 1.6 M in hexane, 0.89 mmol) and stirred for 20 minutes and then

introduced a solution of BF<sub>3</sub>·Et<sub>2</sub>O (106 mg, 0.74 mmol) and stirred at -78 °C for 20 minutes. To this, a solution of ethylene oxide (6.2 M) in anhydrous THF (2.5 mL) was added slowly at -78 °C and the contents stirred for 1 h at the same temperature. Reaction mixture was quenched by adding saturated

sodium bicarbonate (1 mL) and partitioned between ethyl acetate (50 mL) and water (10 mL). The organic layer was washed with brine (10 mL), dried over sodium sulphate and evaporated under reduced pressure. The crude was purified by column chromatography (silica 230–400 mesh, 1:4 ethyl acetate/petroleum ether) to afford compound **22** (462 mg, 87% yield) as a pale yellow oil.  $[\alpha]_D^{25} +31.8$  ( $c$  0.9,  $\text{CHCl}_3$ ); IR ( $\text{CHCl}_3$ ):  $\tilde{\nu}$  3434, 2927, 2856, 2126, 1454, 1216, 1095, 758, 668  $\text{cm}^{-1}$ ;  $^1\text{H}$  NMR ( $\text{CDCl}_3$ , 200 MHz):  $\delta$  -0.01 (s, 3H), 0.02 (s, 3H), 0.82 (s, 9H), 0.86 (t,  $J = 6.3$  Hz, 3H), 1.22 (bs, 16H), 1.44–1.52 (m, 2H), 1.90 (bs, 1H), 2.49 (dt,  $J = 1.7, 6.1$  Hz, 2H), 3.42–3.55 (m, 2H), 3.63 (t,  $J = 6.1$  Hz, 2H), 3.83 (dd,  $J = 4.0, 5.6$  Hz, 1H), 3.91 (dd,  $J = 4.2, 5.6$  Hz, 1H), 4.45 (d,  $J = 11.8$  Hz, 1H), 4.48 (d,  $J = 11.7$  Hz, 1H), 4.51–4.57 (m, 1H), 4.67 (d,  $J = 11.4$  Hz, 1H), 4.84 (d,  $J = 12.1$  Hz, 1H), 4.90 (d,  $J = 11.7$  Hz, 1H), 7.24–7.37 (m, 15H);  $^{13}\text{C}$  NMR ( $\text{CDCl}_3$ , 50 MHz):  $\delta$  -4.4 (q), -4.2 (q), 14.1 (q), 18.2 (s), 22.7 (t), 23.4 (t), 26.00 (q, 3C), 26.1 (t), 29.3 (t), 29.60 (t, 3C), 29.7 (t), 30.4 (t), 31.9 (t), 60.9 (t), 70.8 (t), 71.5 (d), 71.8 (t), 73.4 (d), 73.8 (t), 79.6 (s), 80.2 (d), 81.7 (d), 84.6 (s), 127.1 (d), 127.3 (d), 127.50 (d, 2C), 127.6 (d), 127.84 (d, 2C), 127.91 (d, 2C), 128.10 (d, 4C), 128.30 (d, 2C), 138.0 (s), 138.7 (s), 139.2 (s) ppm; ESI-MS ( $m/z$ ): 715.69 (20%  $[\text{M}+1]^+$ ), 737.85 (100%  $[\text{M}+\text{Na}]^+$ ), 753.68 (50%,  $[\text{M}+\text{K}]^+$ ); HRMS: 753.4317 ( $[\text{M}+\text{K}]^+$ ) calculated, 753.4371 ( $[\text{M}+\text{K}]^+$ ) observed; Anal. Calcd for  $\text{C}_{45}\text{H}_{66}\text{O}_5\text{Si}$ : C, 75.58; H, 9.30; Found: C, 75.64; H, 9.48.

### 15. Synthesis of benzyl ether **23**:

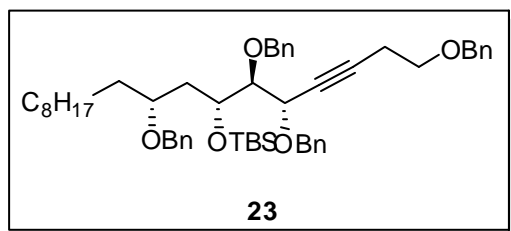

To a solution of alcohol **22** (100 mg, 0.14 mmol) in anhydrous DMF (3 mL) sodium hydride (60% oil suspension, 11 mg, 0.28 mmol) was added at 0 °C and allowed to stir for 10 minutes and treated with benzyl bromide (31 mg, 0.18 mmol) slowly. The

contents were stirred at room temperature for 2 h. The reaction mixture was partitioned between ethyl acetate (30 mL) and water (50 mL). Organic layer was washed with water (3 × 5 mL), brine (5 mL), dried over sodium sulphate and evaporated under reduced pressure. The crude was purified by column

chromatography (silica 230–400 mesh, 15:85 ethyl acetate/petroleum ether) to afford compound **23** (96 mg, 86% yield) as colorless oil.  $[\alpha]_{\text{D}}^{25} +41.7$  (*c* 1.2,  $\text{CHCl}_3$ ); IR ( $\text{CHCl}_3$ ):  $\tilde{\nu}$  3019, 2925, 2856, 2210, 1464, 1215, 1095, 757, 669  $\text{cm}^{-1}$ ;  $^1\text{H}$  NMR ( $\text{CDCl}_3$ , 200 MHz):  $\delta$  0.00 (s, 3H), 0.04 (s, 3H), 0.84 (s, 9H), 0.88 (t,  $J = 6.2$  Hz, 3H), 1.20–1.24 (m, 16H), 1.42–1.53 (m, 2H), 2.59 (dt,  $J = 1.8, 7.3$  Hz, 2H), 3.46–3.58 (m, 1H), 3.59 (t,  $J = 7.3$  Hz, 2H), 3.78 (t,  $J = 4.9$  Hz, 1H), 3.94 (t,  $J = 4.9$  Hz, 1H), 4.45 (dd,  $J = 4.1, 11.8$  Hz, 2H), 4.51–4.58 (m, 4H), 4.67 (d,  $J = 11.5$  Hz, 1H), 4.86 (d,  $J = 12.0$ , 1H), 4.92 (d,  $J = 12.0$ , 1H), 7.23–7.39 (m, 20H);  $^{13}\text{C}$  NMR ( $\text{CDCl}_3$ , 50 MHz):  $\delta$  -4.3 (q), -4.2 (q), 14.1 (q), 18.2 (s), 20.4 (t), 22.7 (t), 25.9 (t), 26.05 (q, 3C), 29.3 (t), 29.60 (t, 3C), 29.7 (t), 30.6 (t), 31.9 (t), 68.6 (t), 70.6 (t), 71.1 (d), 71.9 (t), 72.9 (t), 73.7 (t), 74.0 (d), 78.3 (s), 80.1 (d), 81.6 (d), 84.3 (s), 127.1 (d), 127.2 (d), 127.44 (d, 3C), 127.60 (d, 3C), 127.84 (d, 2C), 127.92 (d, 2C), 128.0 (d), 128.04 (d, 3C), 128.22 (d, 2C), 128.30 (d, 2C), 138.10 (s, 2C), 139.0 (s), 139.3 (s) ppm; ESI-MS ( $m/z$ ): 319.32 (100%), 827.80 (10%  $[\text{M}+\text{Na}]^+$ ), 843.94 (10%  $[\text{M}+\text{K}]^+$ ); HRMS: 843.4786 ( $[\text{M}+\text{K}]^+$ ) calculated, 843.4781 ( $[\text{M}+\text{K}]^+$ ) observed; Anal. Calcd for  $\text{C}_{52}\text{H}_{72}\text{O}_5\text{Si}$ : C, 77.56; H, 9.01; Found: C, 77.65; H, 9.09.

## 16. Synthesis of alcohol **24**:

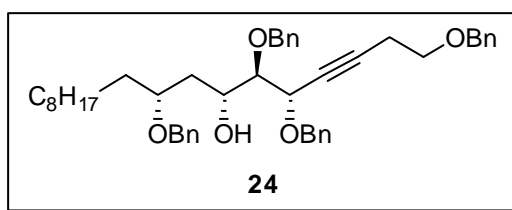

To an ice cooled solution of TBS ether **23** (100 mg, 0.12 mmol) in anhydrous THF (3 mL), was added a solution of TBAF (65 mg, 0.24 mmol) in anhydrous THF (0.5 mL) under

Argon atmosphere and allowed to stir at room temperature for 4 h. Reaction mixture was concentrated and residue was purified by column chromatography (silica 230–400 mesh, 2:8 ethyl acetate/petroleum ether) to afford compound **24** (70 mg, 82% yield) as a colorless oil.  $[\alpha]_{\text{D}}^{25} +39.6$  (*c* 1.2,  $\text{CHCl}_3$ ); IR ( $\text{CHCl}_3$ ):  $\tilde{\nu}$  3475, 3018, 2925, 2132, 1454, 1215, 1095, 759, 667  $\text{cm}^{-1}$ ;  $^1\text{H}$  NMR ( $\text{CDCl}_3$ , 200 MHz):  $\delta$  0.88 (t,  $J = 6.7$  Hz, 3H), 1.25 (bs, 16H), 1.57–1.70 (m, 2H), 2.43 (bs, 1H), 2.61 (dt,  $J = 1.8, 7.2$  Hz, 2H), 3.54–3.59 (m, 1H), 3.62 (t,  $J = 7.1$  Hz, 2H), 3.76 (d,  $J = 2.5, 8.7$  Hz, 1H), 3.82–3.88 (m, 1H), 4.21 (d,  $J = 11.3$  Hz, 1H), 4.46–4.54 (m, 5H), 4.67–4.70 (m, 1H), 4.93 (d,  $J = 11.5$  Hz, 1H), 4.98 (d,  $J = 11.7$



Hz, 1H), 7.21–7.34 (m, 20H);  $^{13}\text{C}$  NMR ( $\text{CDCl}_3$ , 50 MHz):  $\delta$  14.1 (q), 20.4 (t), 22.67 (t, 2C), 24.5 (t), 29.3 (t), 29.56 (t, 2C), 29.8 (t), 31.89 (t, 2C), 68.5 (t), 70.4(t), 70.8 (t), 71.1 (d), 71.9 (d), 73.0 (t), 74.3 (t), 76.8 (s), 80.2 (d), 83.2 (d), 84.7 (s), 127.5 (d), 127.54 (d, 2C), 127.65 (d), 127.74 (d), 127.81 (d, 2C), 128.19 (d, 2C), 128.3 (d), 128.35 (d, 3C), 128.40 (d, 4C), 128.52 (d, 3C), 137.9 (s), 138.02 (s), 138.05 (s), 138.5 (s) ppm; ESI–MS ( $m/z$ ): 691.33 (9%  $[\text{M}+1]^+$ ), 713.47 (100%  $[\text{M}+\text{Na}]^+$ ); HRMS: 729.3921 ( $[\text{M}+\text{K}]^+$ ) calculated, 729.3822 ( $[\text{M}+\text{K}]^+$ ) observed; Anal. Calcd for  $\text{C}_{46}\text{H}_{58}\text{O}_5$ : C, 79.96; H, 8.46; Found: C, 79.84; H, 8.48.

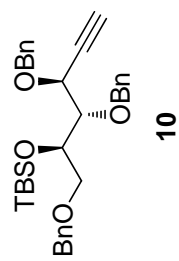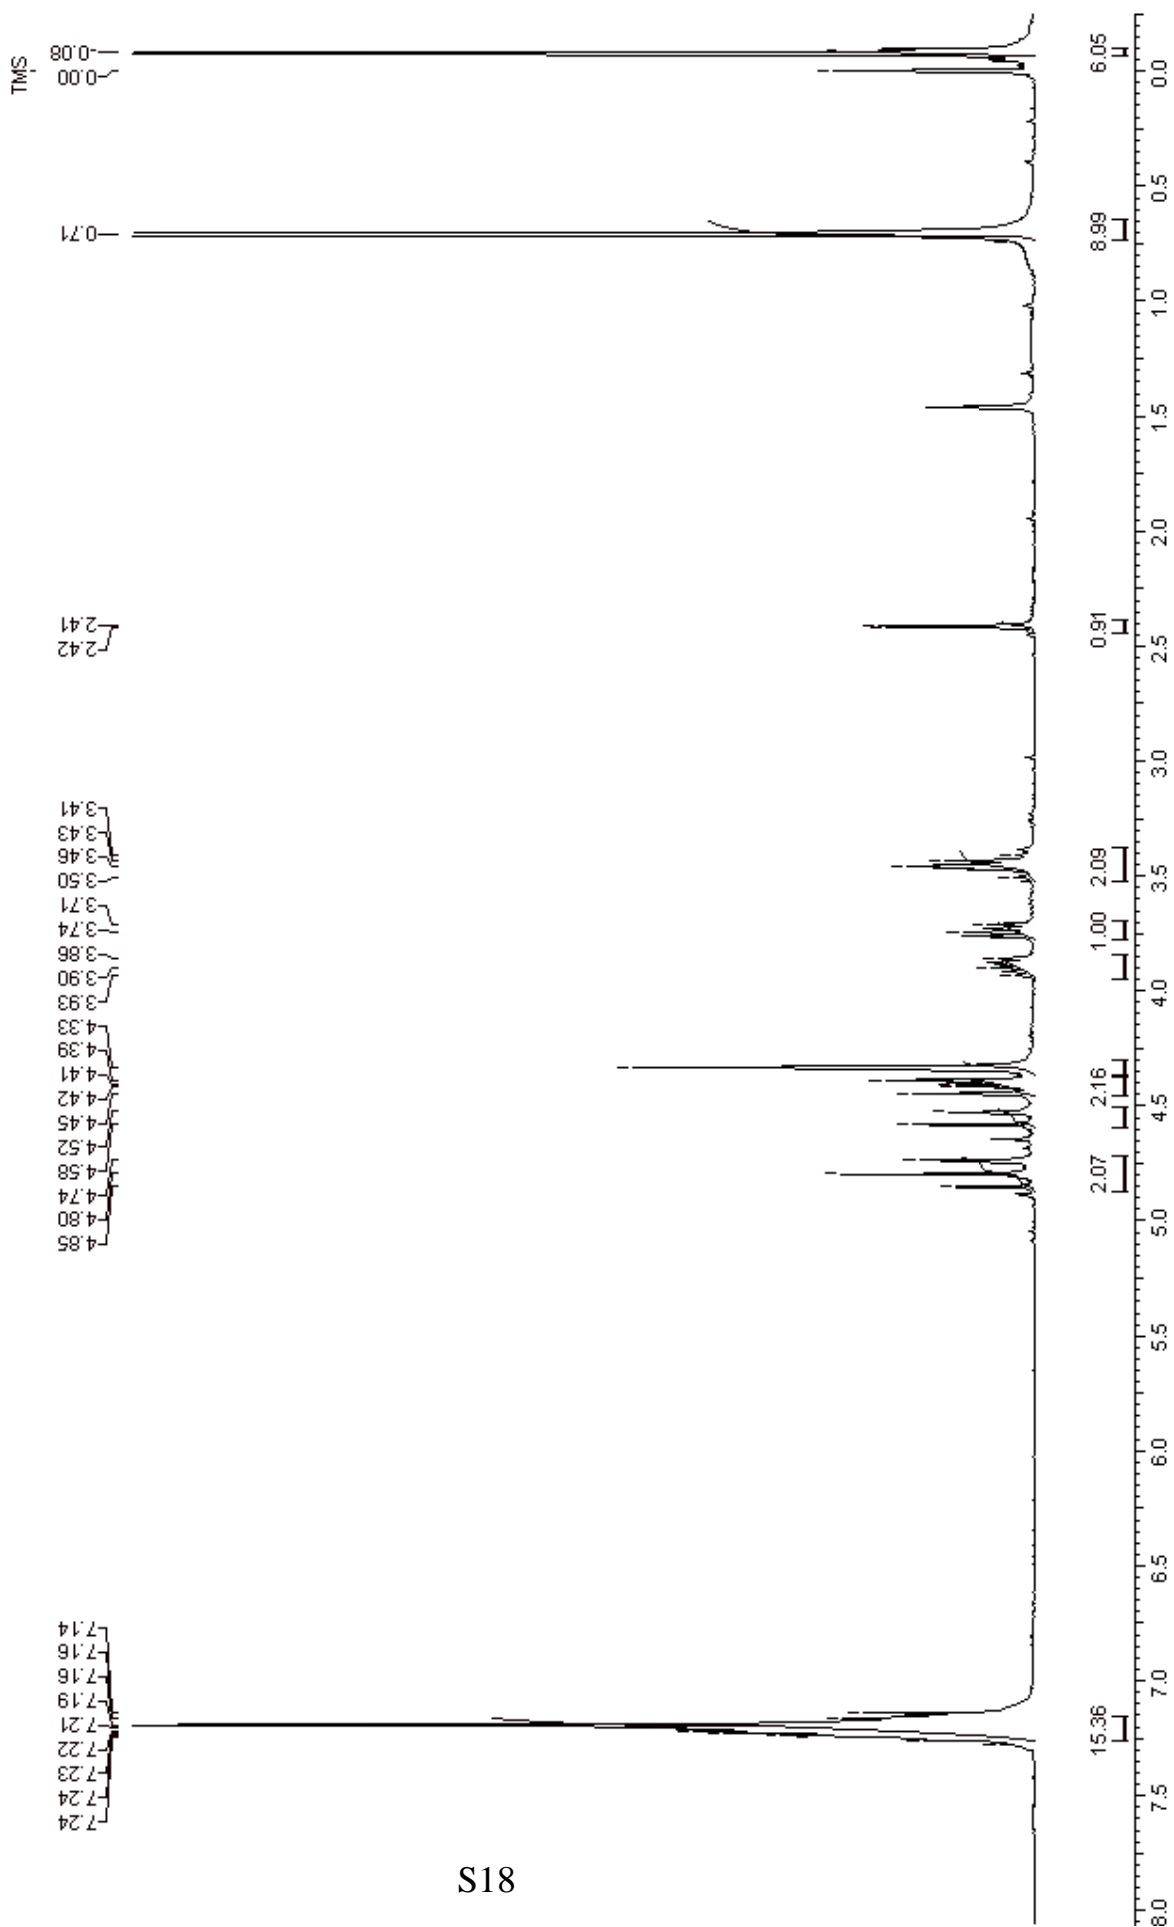

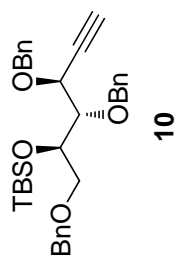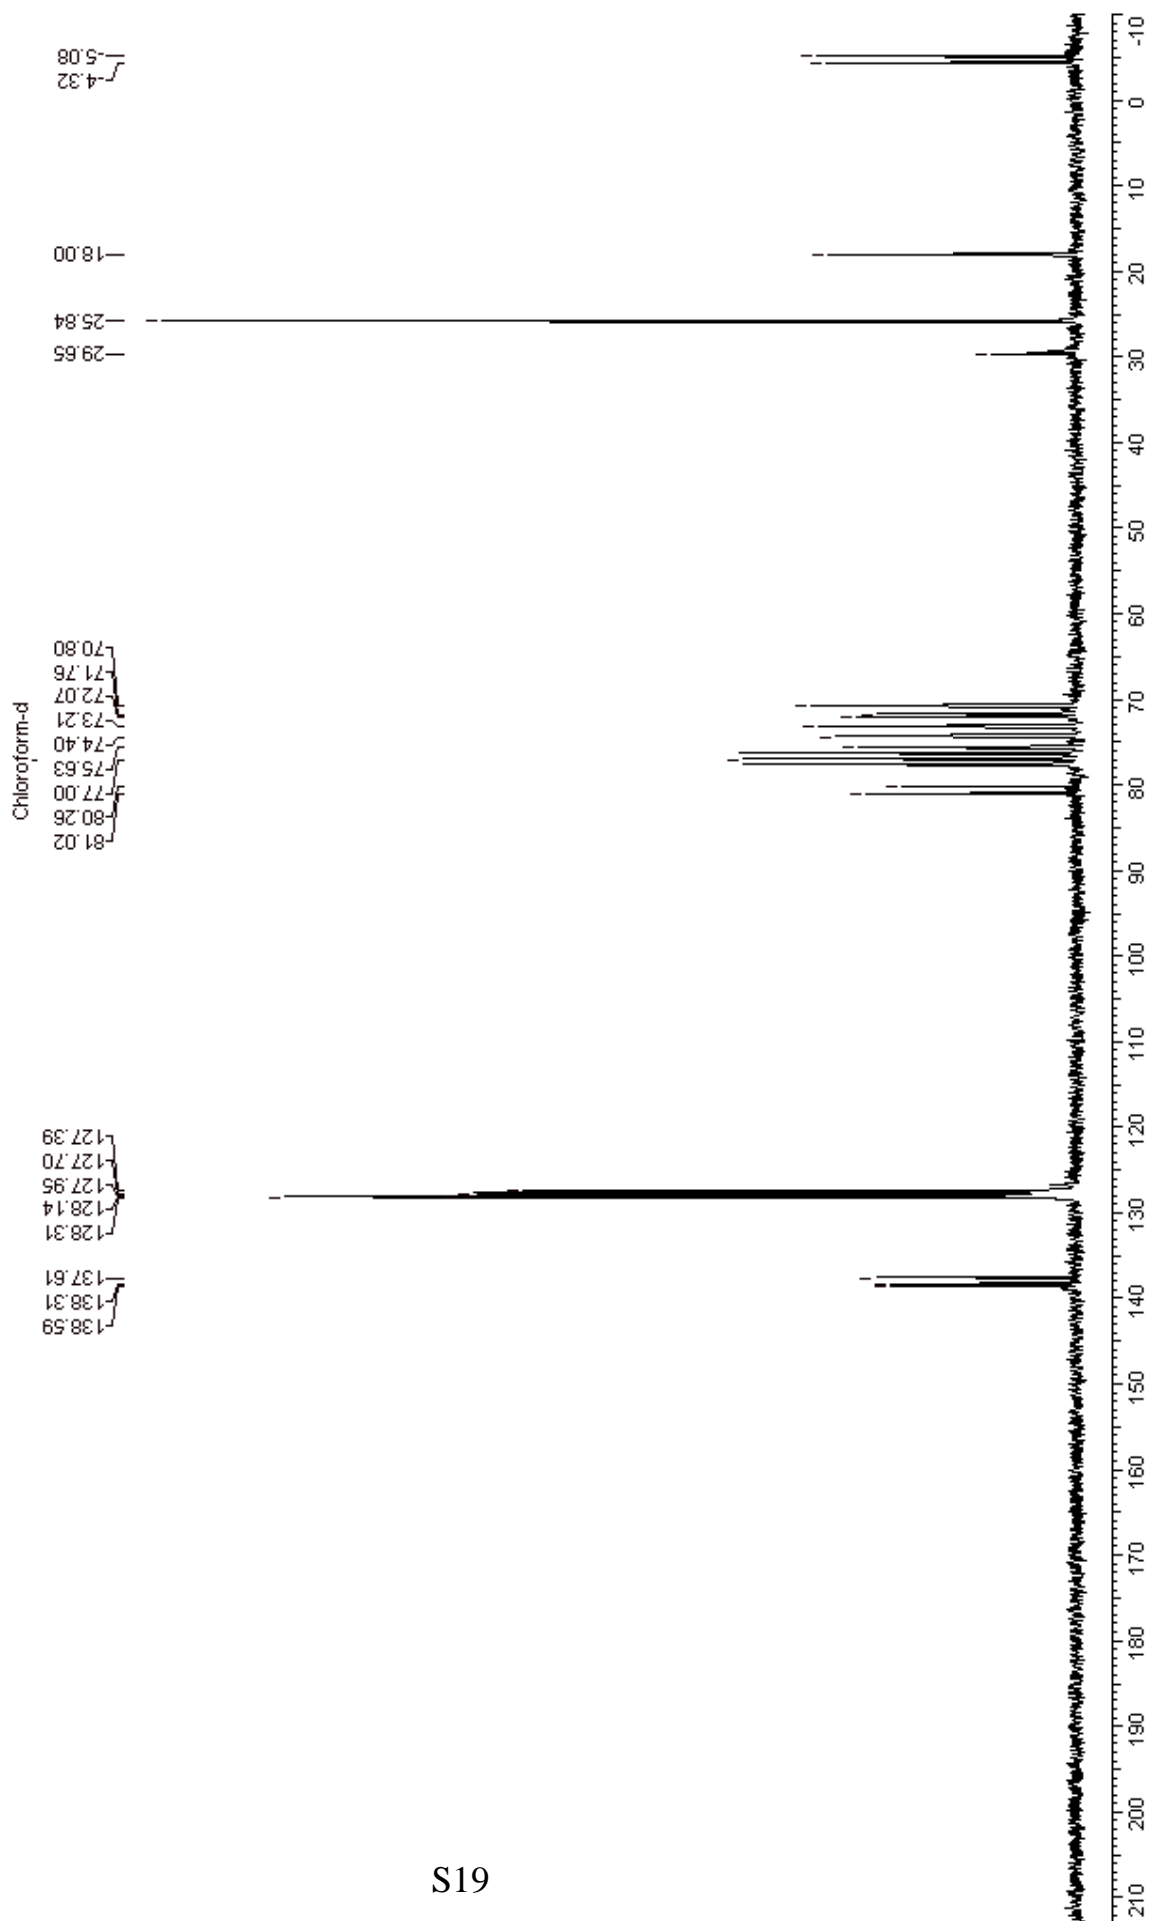

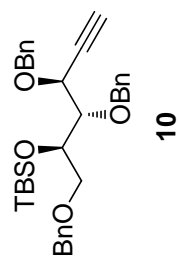

10

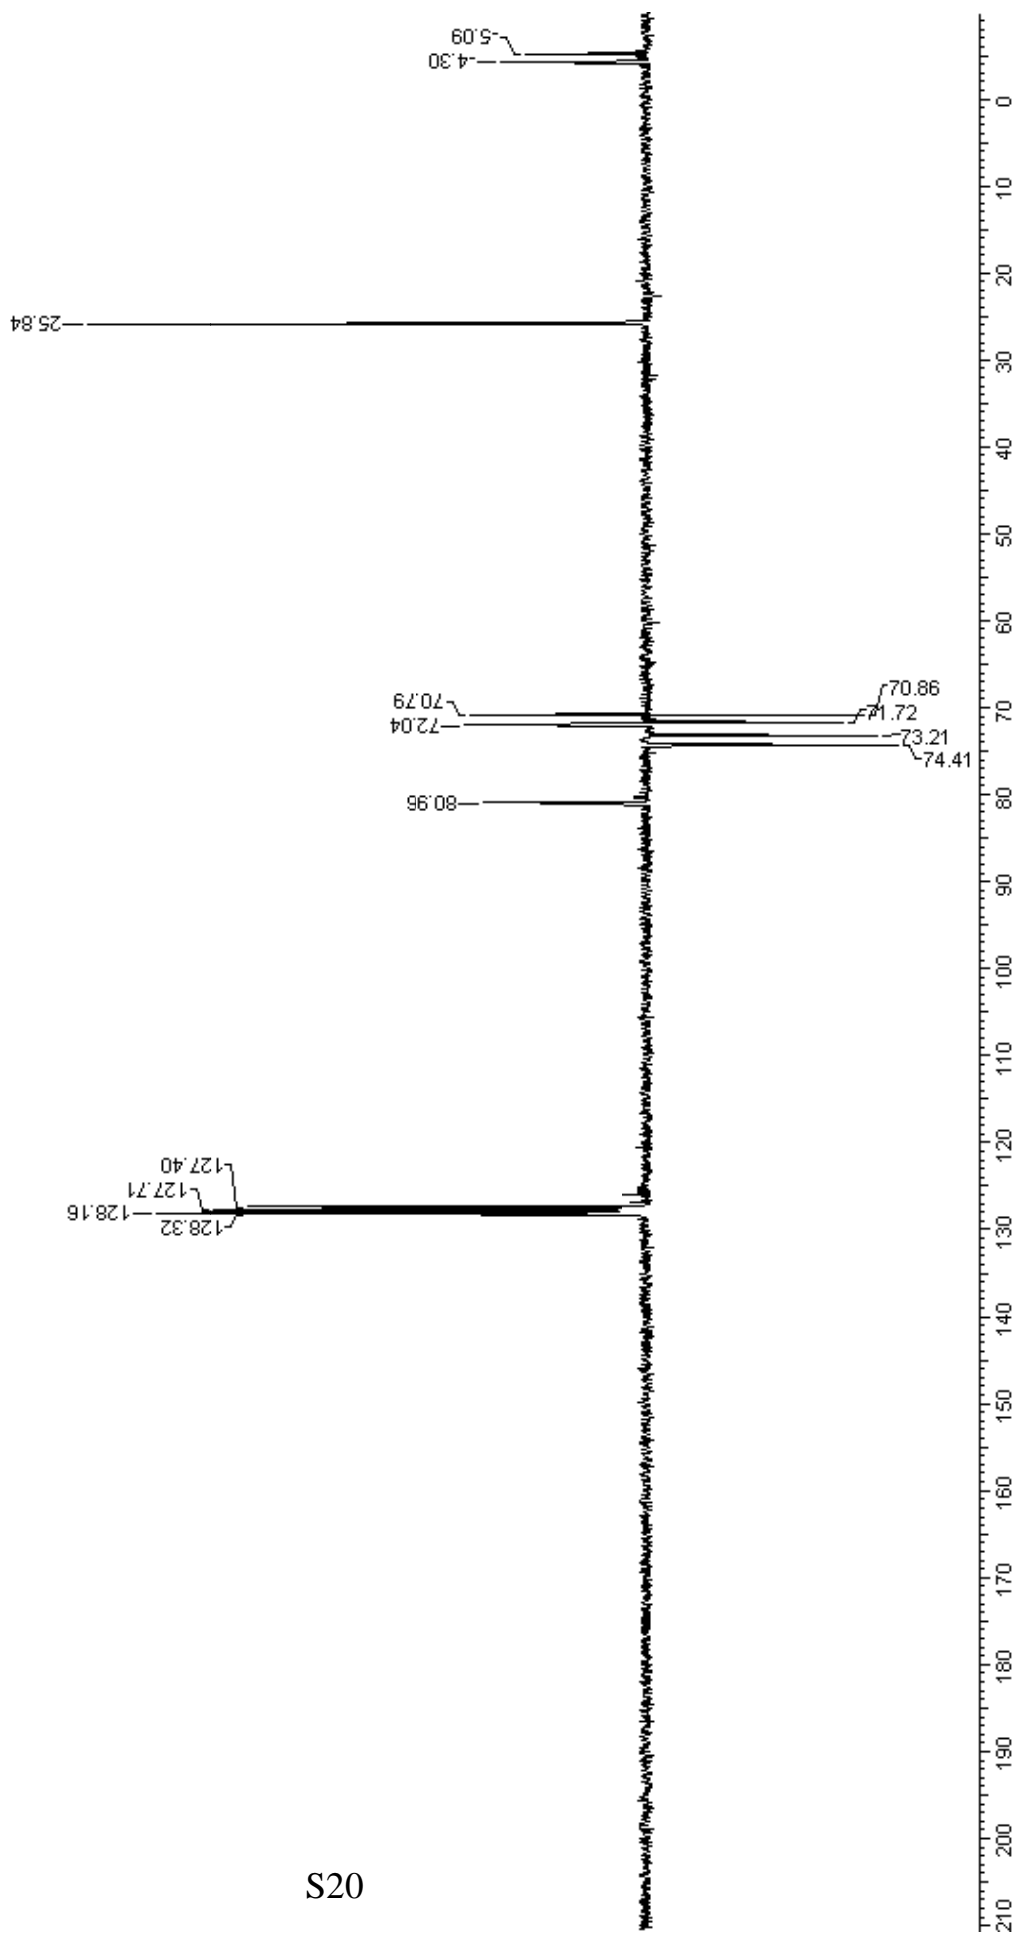

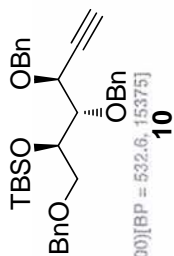

**Applied Biosystems Voyager System 4383**

Voyager Spec #1=>AdvBC(32.0,5.0,1)=>NR(2.00)[BP = 532.6, 15375]

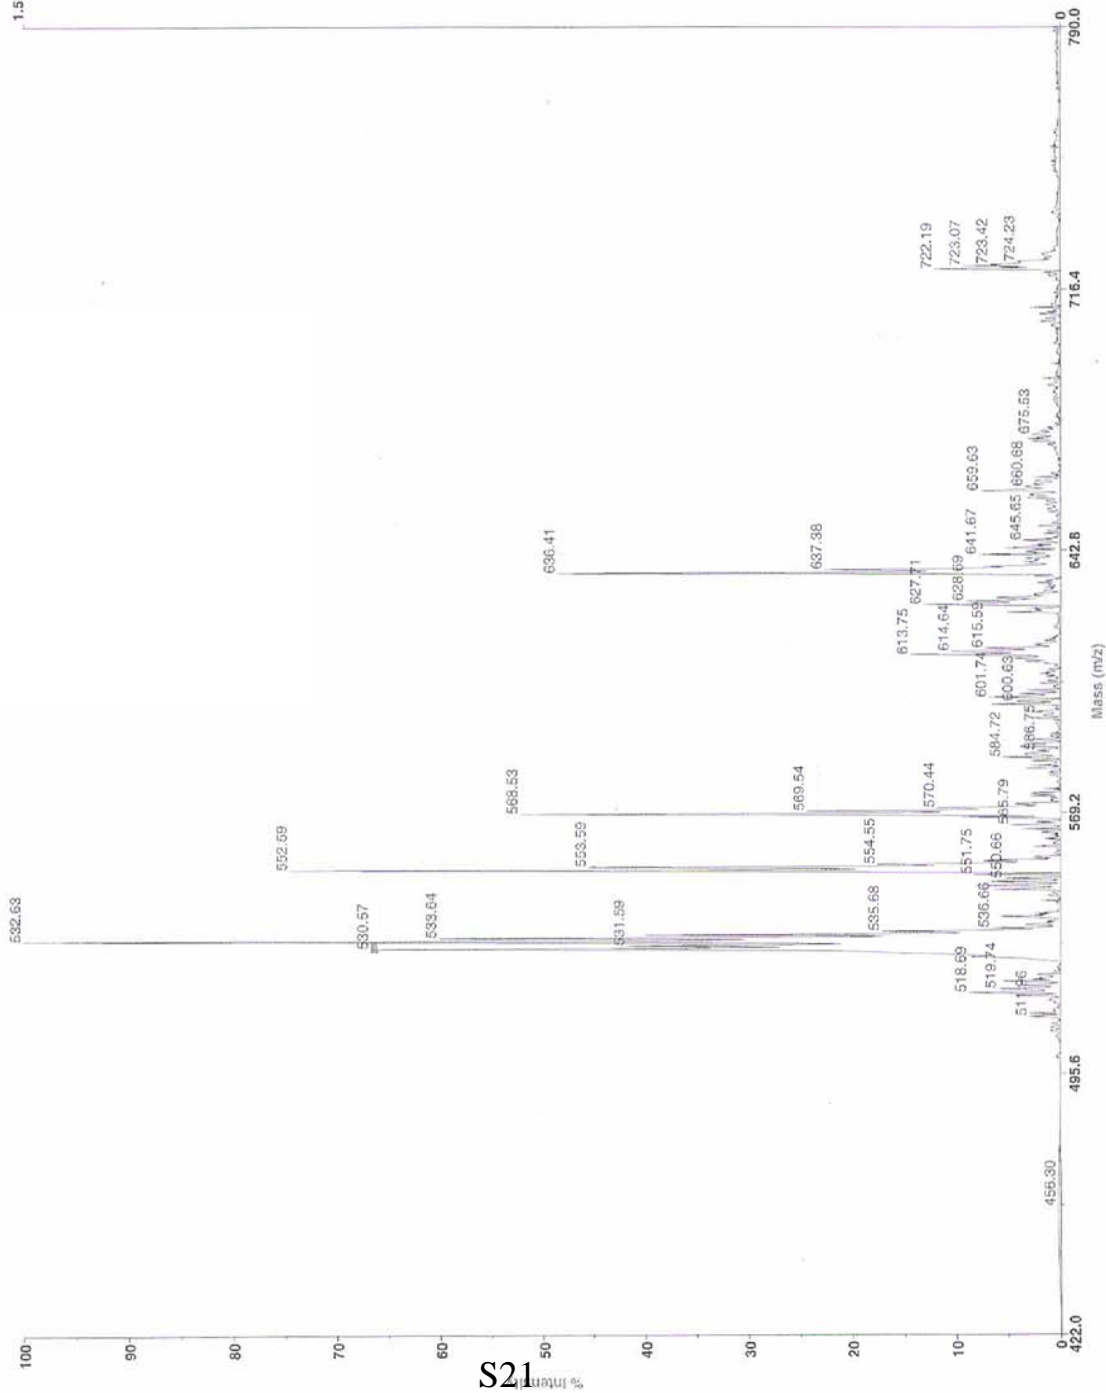

Mode of operation: Linear  
 Extraction mode: Delayed  
 Polarity: Positive  
 Acquisition control: Manual  
 Accelerating voltage: 20000 V  
 Grid voltage: 94%  
 Guide wire O: 0.05%  
 Extraction delay time: 100 nsec

Acquisition mass range: 100 -- 3000 Da  
 Number of laser shots: 100/spectrum  
 Laser intensity: 2402  
 Laser Rep Rate: 20.0 Hz  
 Calibration type: Default  
 Calibration matrix: 2,5-Dihydroxybenzoic acid  
 Low mass gate: 500 Da

Digitizer start time: 10.042  
 Bin size: 2 nsec  
 Number of data points: 22235  
 Vertical scale: 500 mV  
 Vertical offset: 0%  
 Input bandwidth: 500 MHz

Sample well: 12  
 Plate ID: 100 WELL NUMBER PLATE  
 Serial number: 4383  
 Instrument name: Voyager-DE STR  
 Plate type filename: C:\VOYAGER\100 well plate.plt  
 Lab name: PE Biosystems

Absolute x-position: 6965.62  
 Absolute y-position: 42272.1  
 Relative x-position: -301.883  
 Relative y-position: 44.5895  
 Shots in spectrum: 100  
 Source pressure: 1.961e-007  
 Mirror pressure: 4.312e-008  
 TC2 pressure: 0.001  
 TIS gate width: 8  
 TIS flight length: 1189

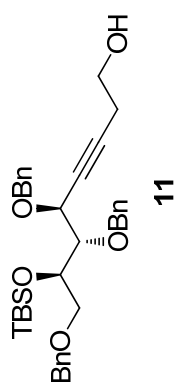

11

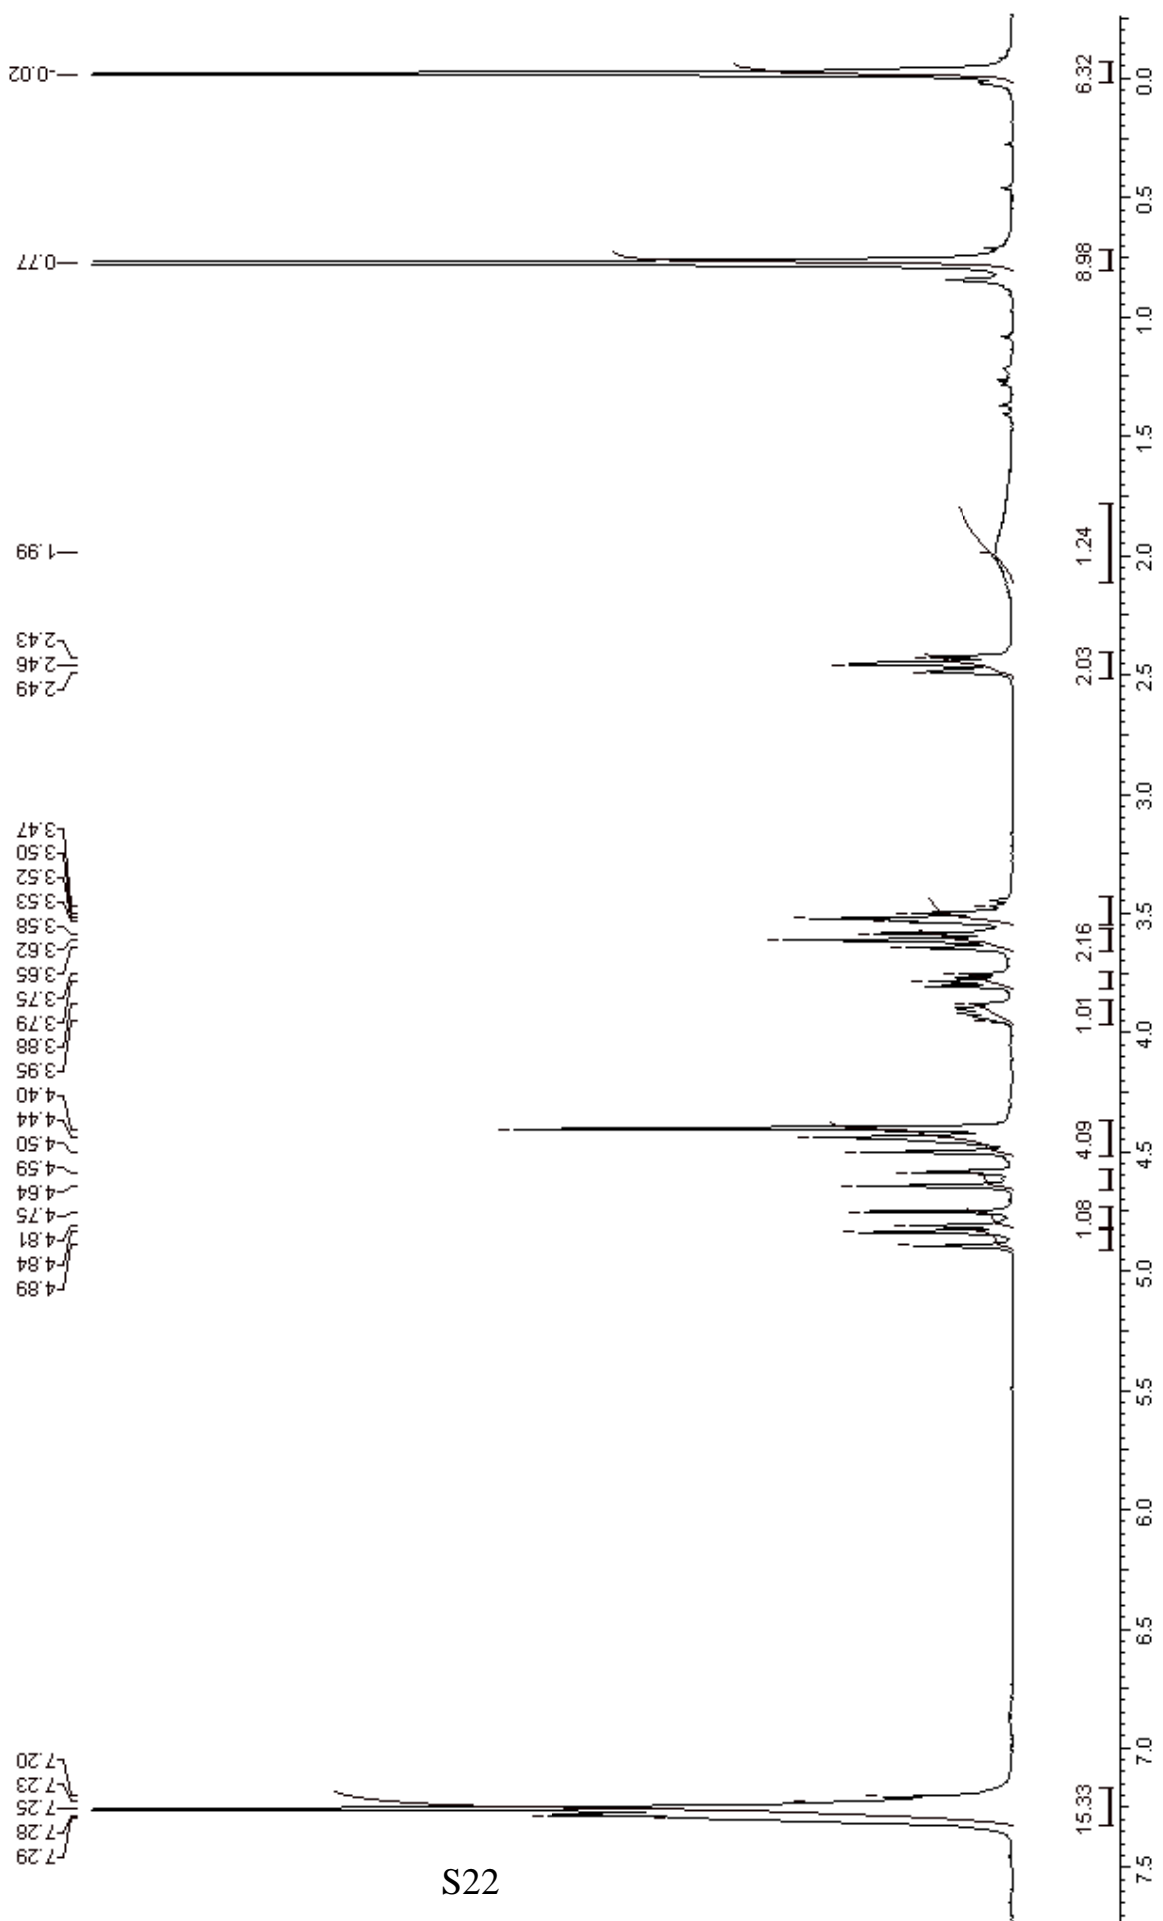

S22

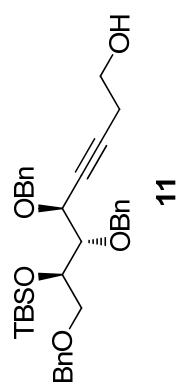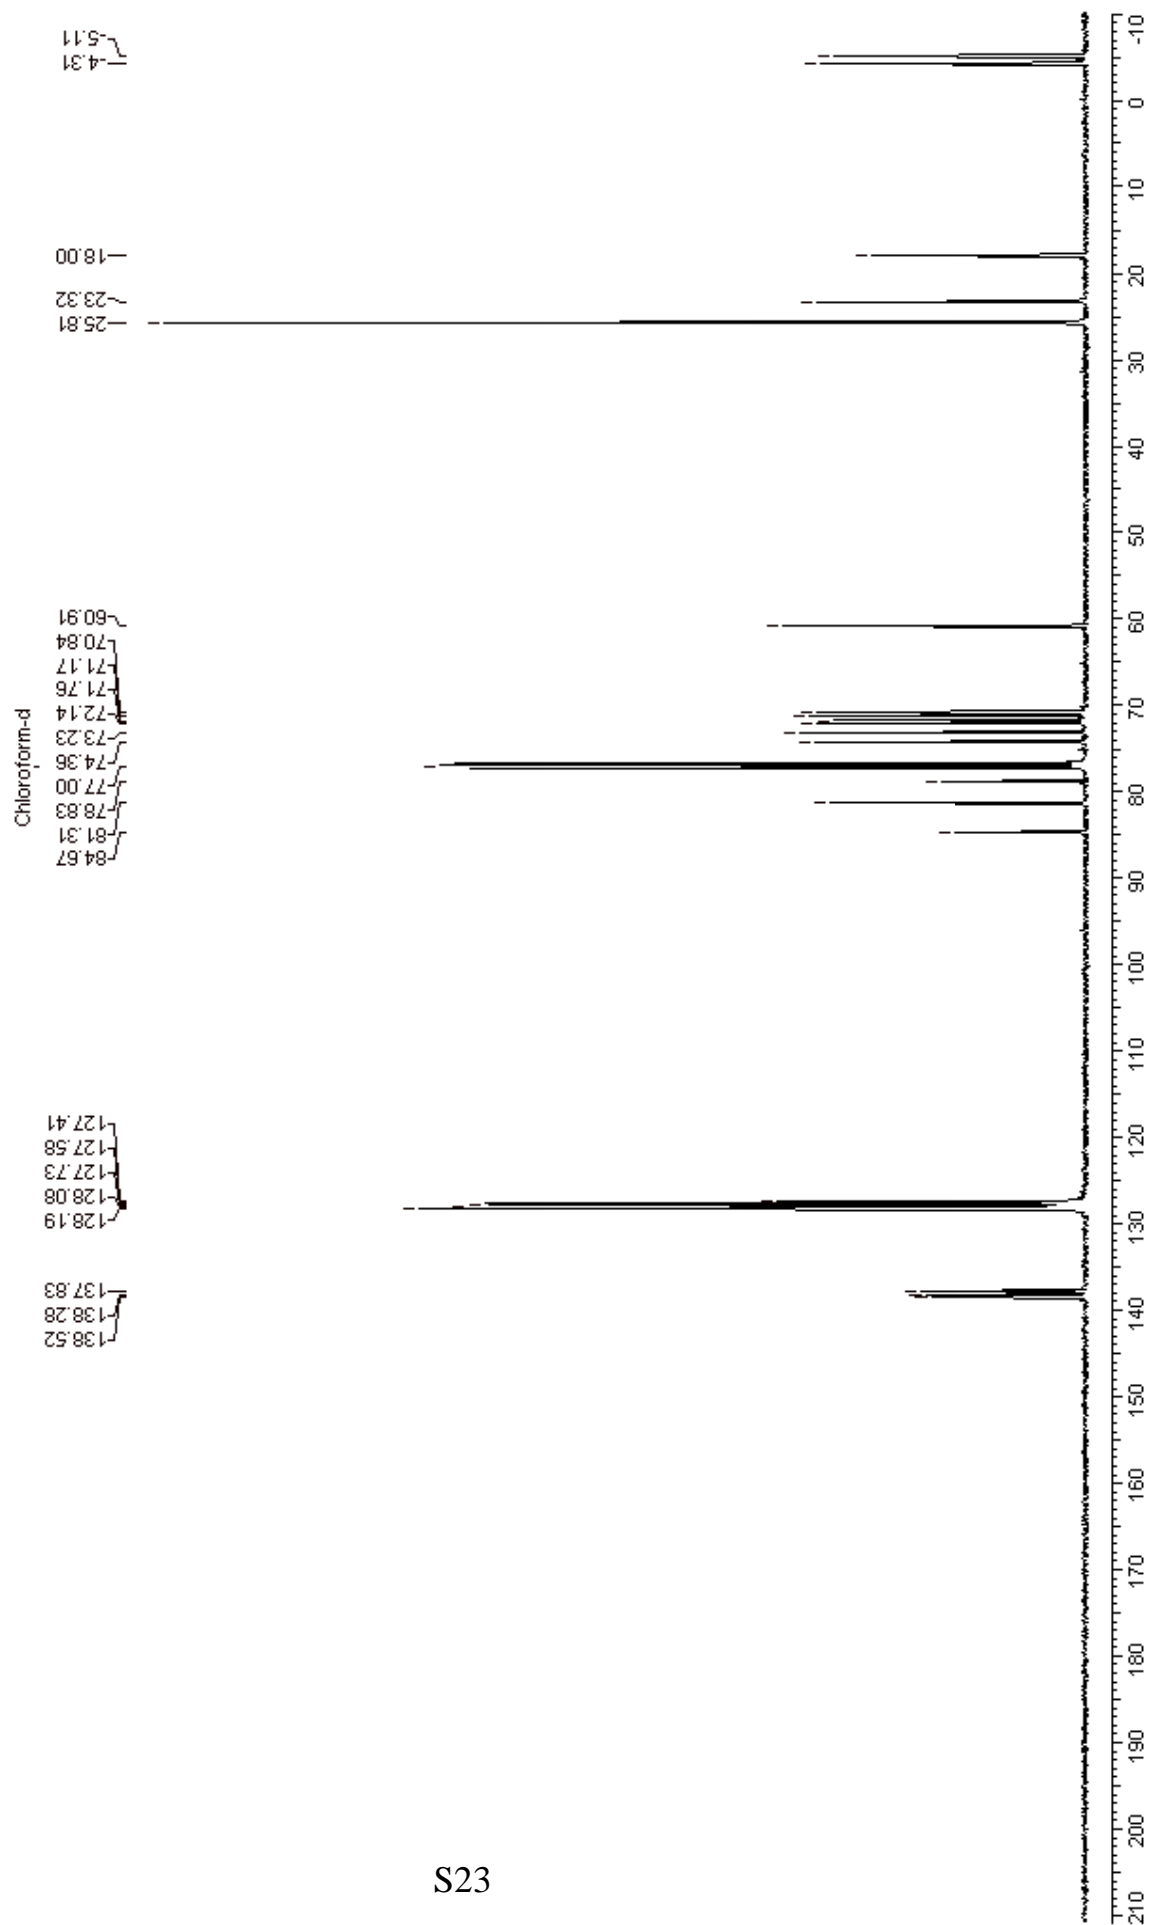

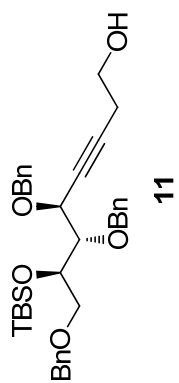

11

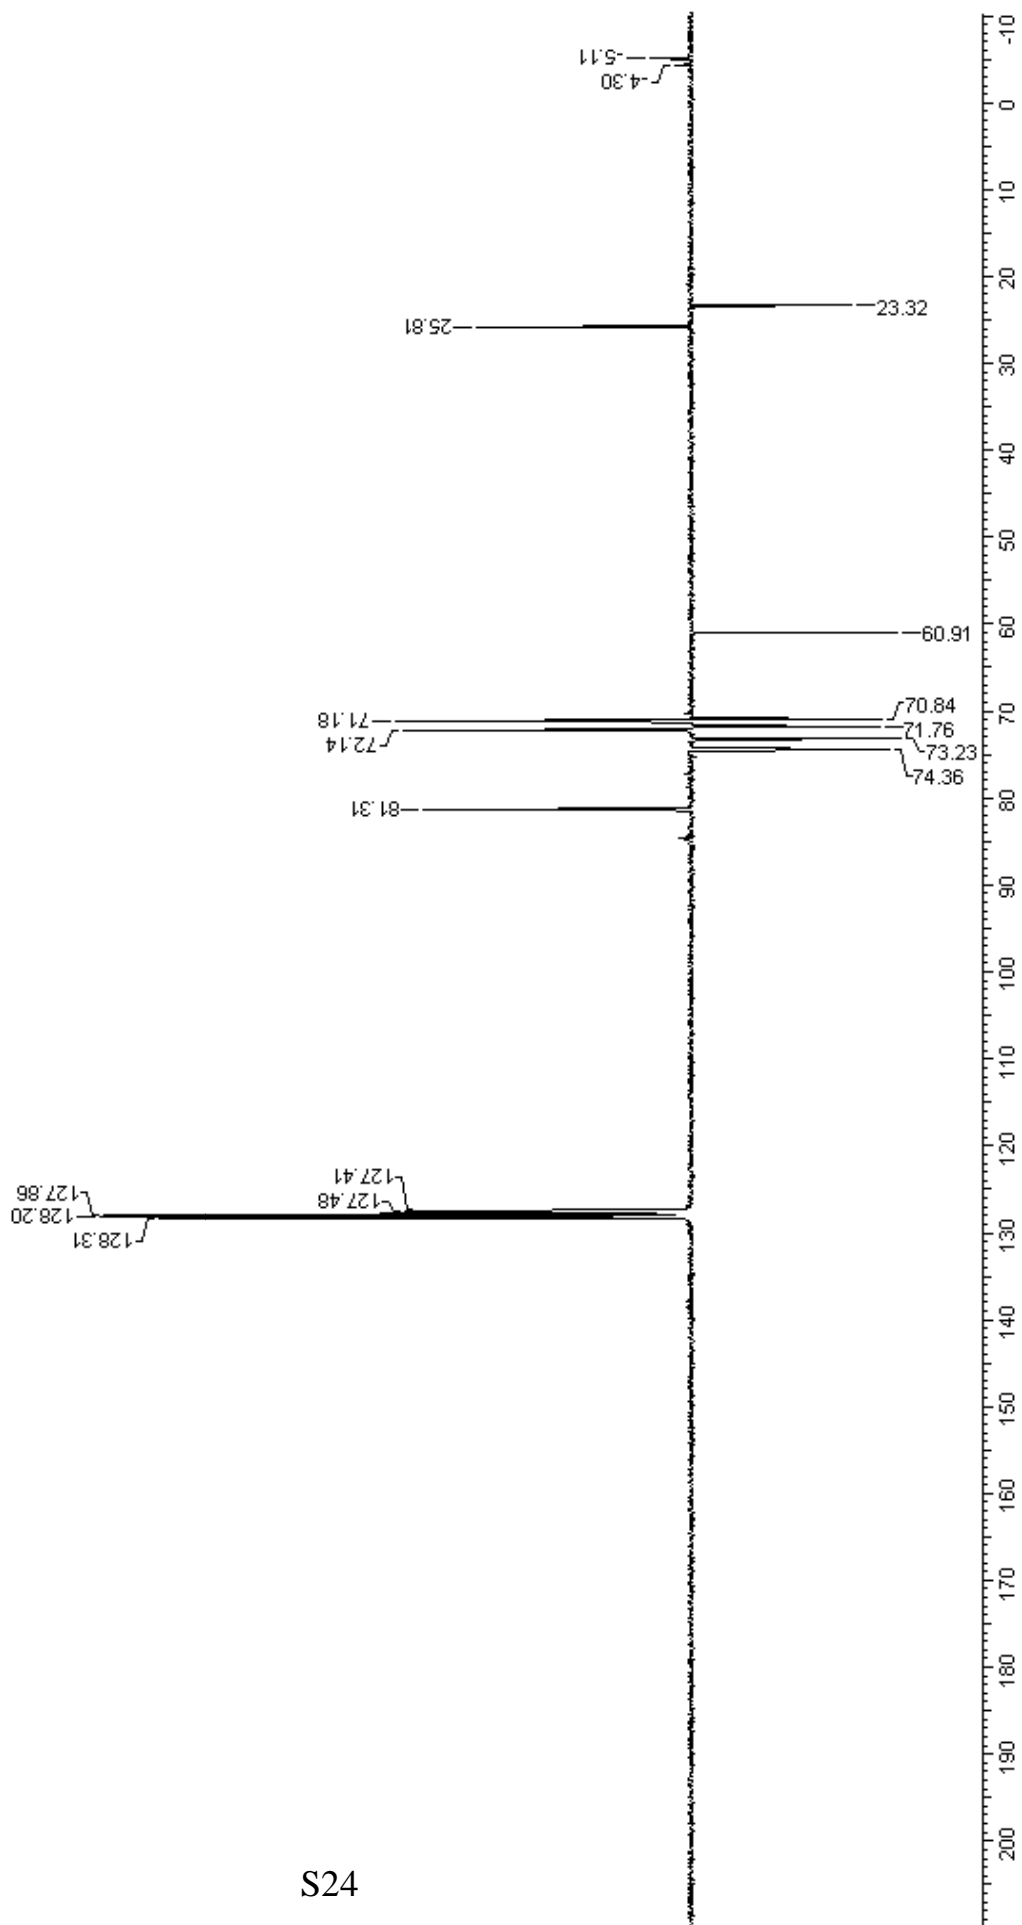



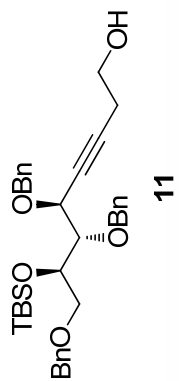

11

SN\_469/10

\*LCMSMS - 0 STAR PULSAR

576.03 - 170.35

+TOF MS: 0.033 to 1.917 min from SN\_469.wiff  
a=3.29449504724565420e-004, t0=-3.49418683411422530e+001 R;

Max. 0.7 counts

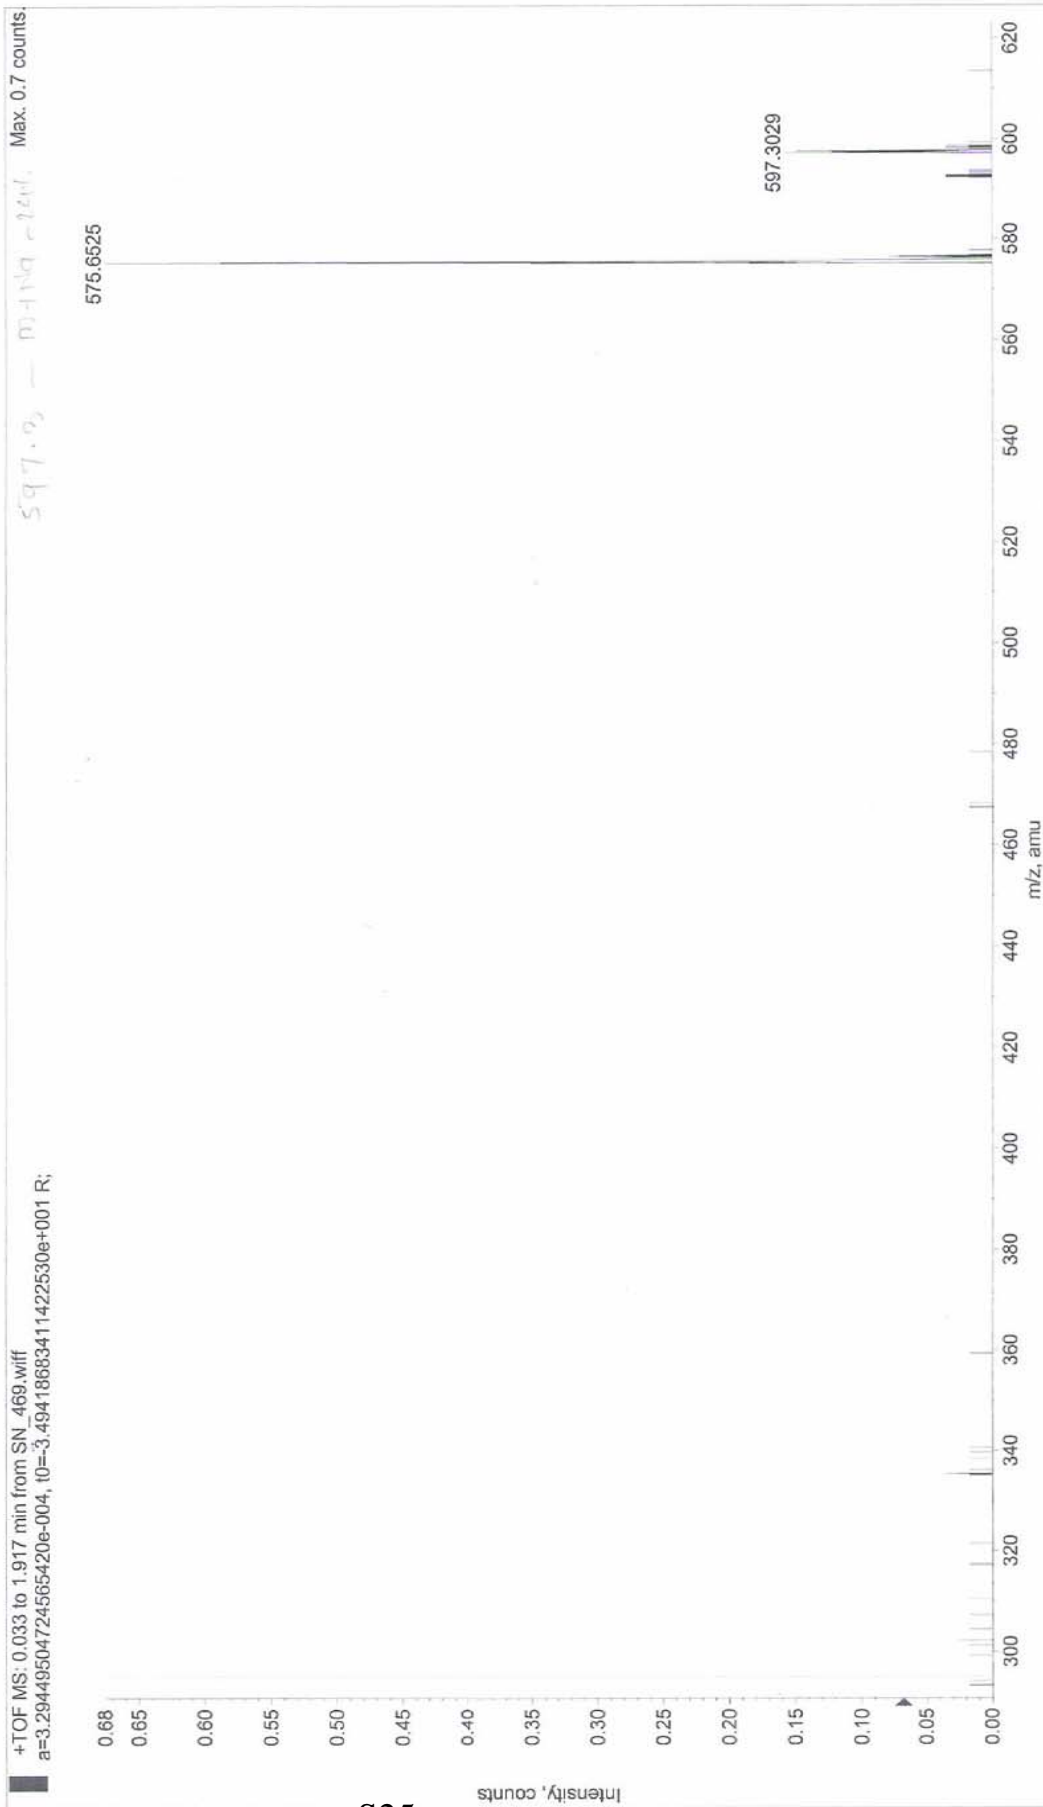

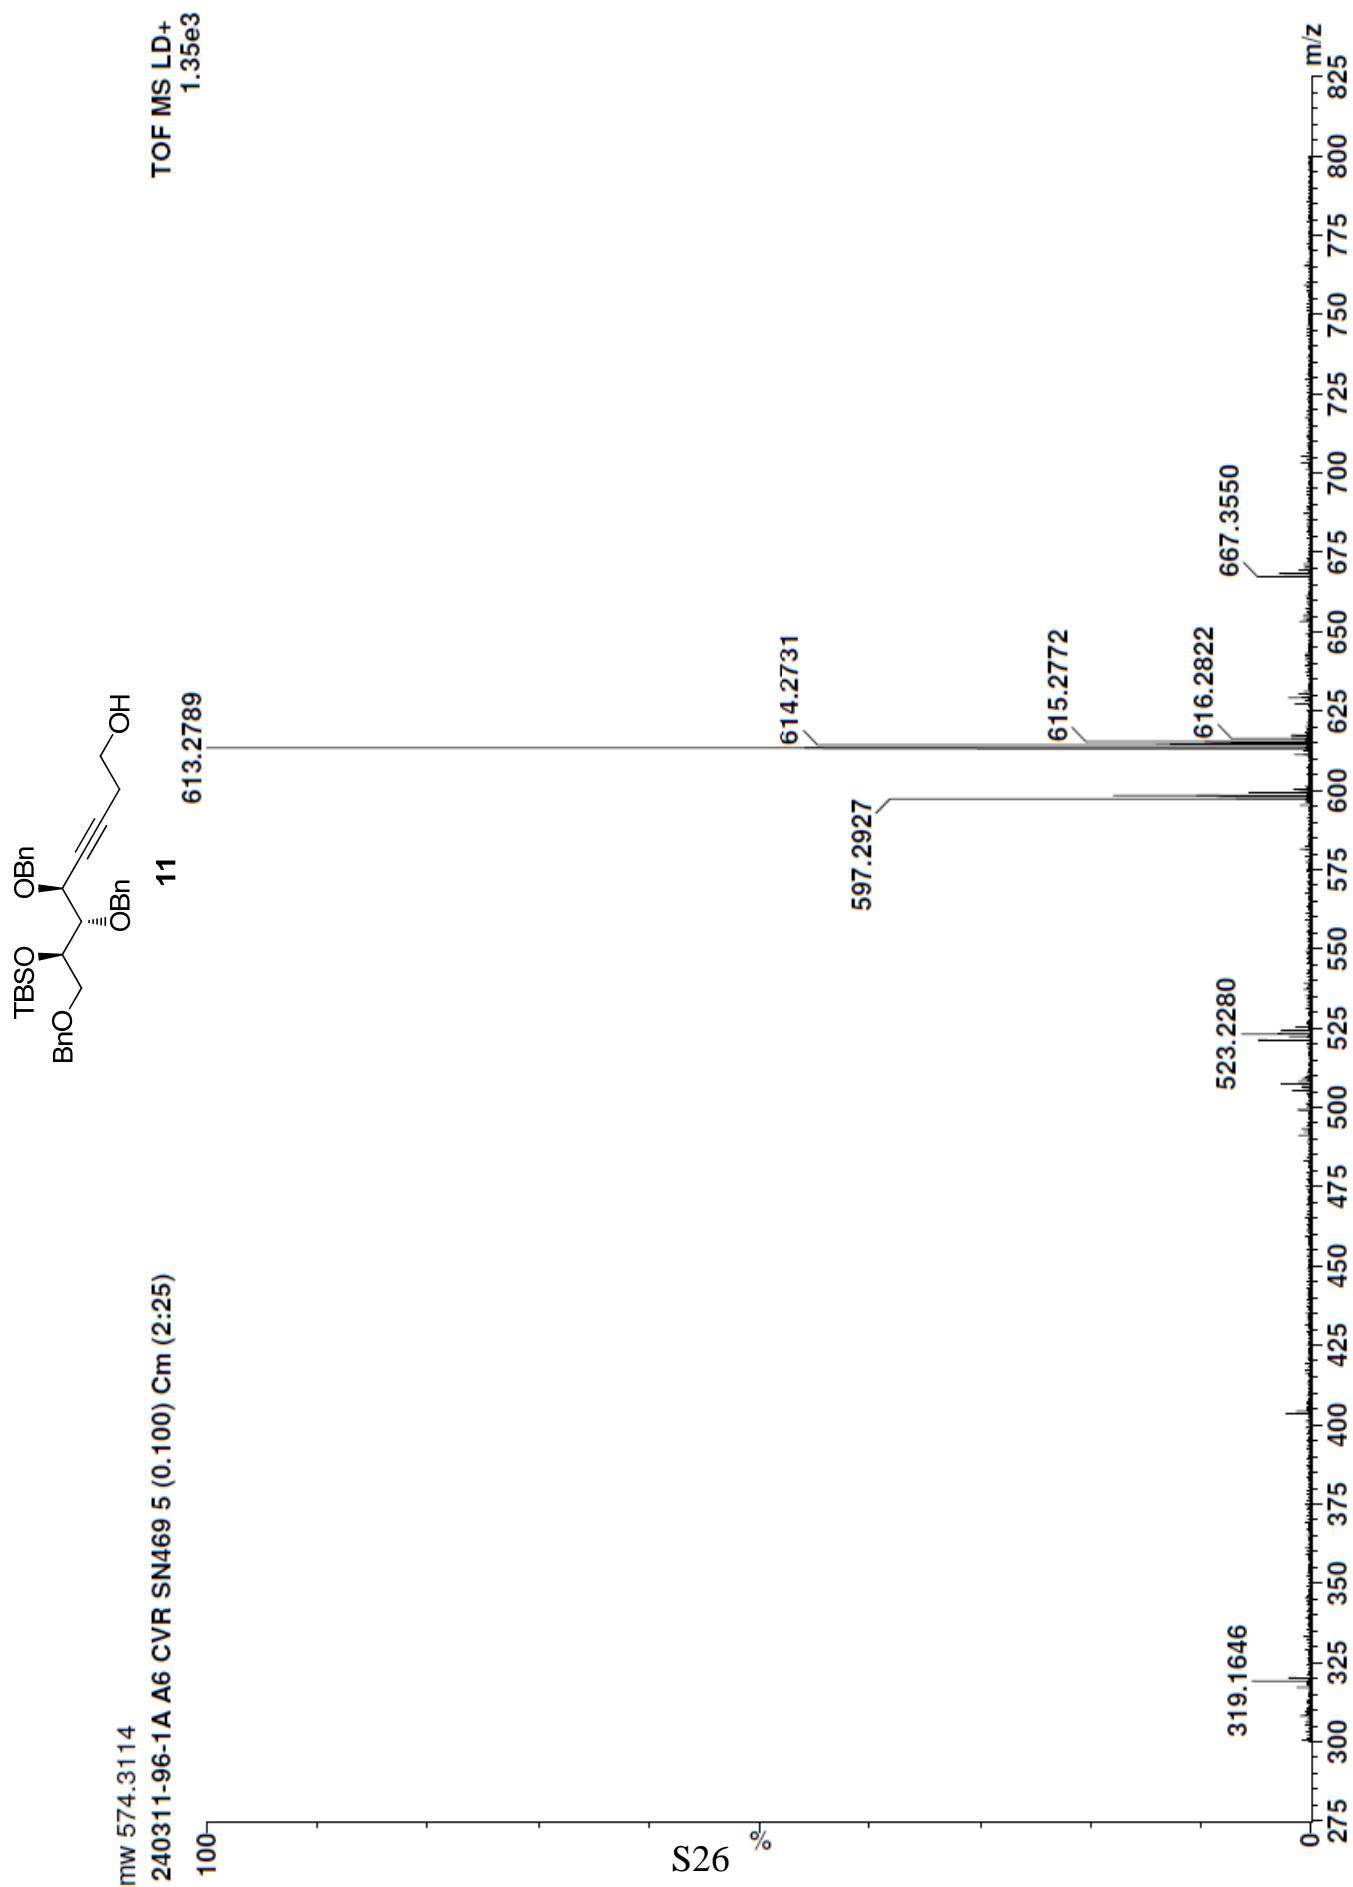

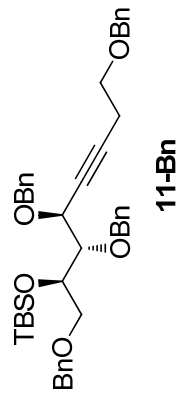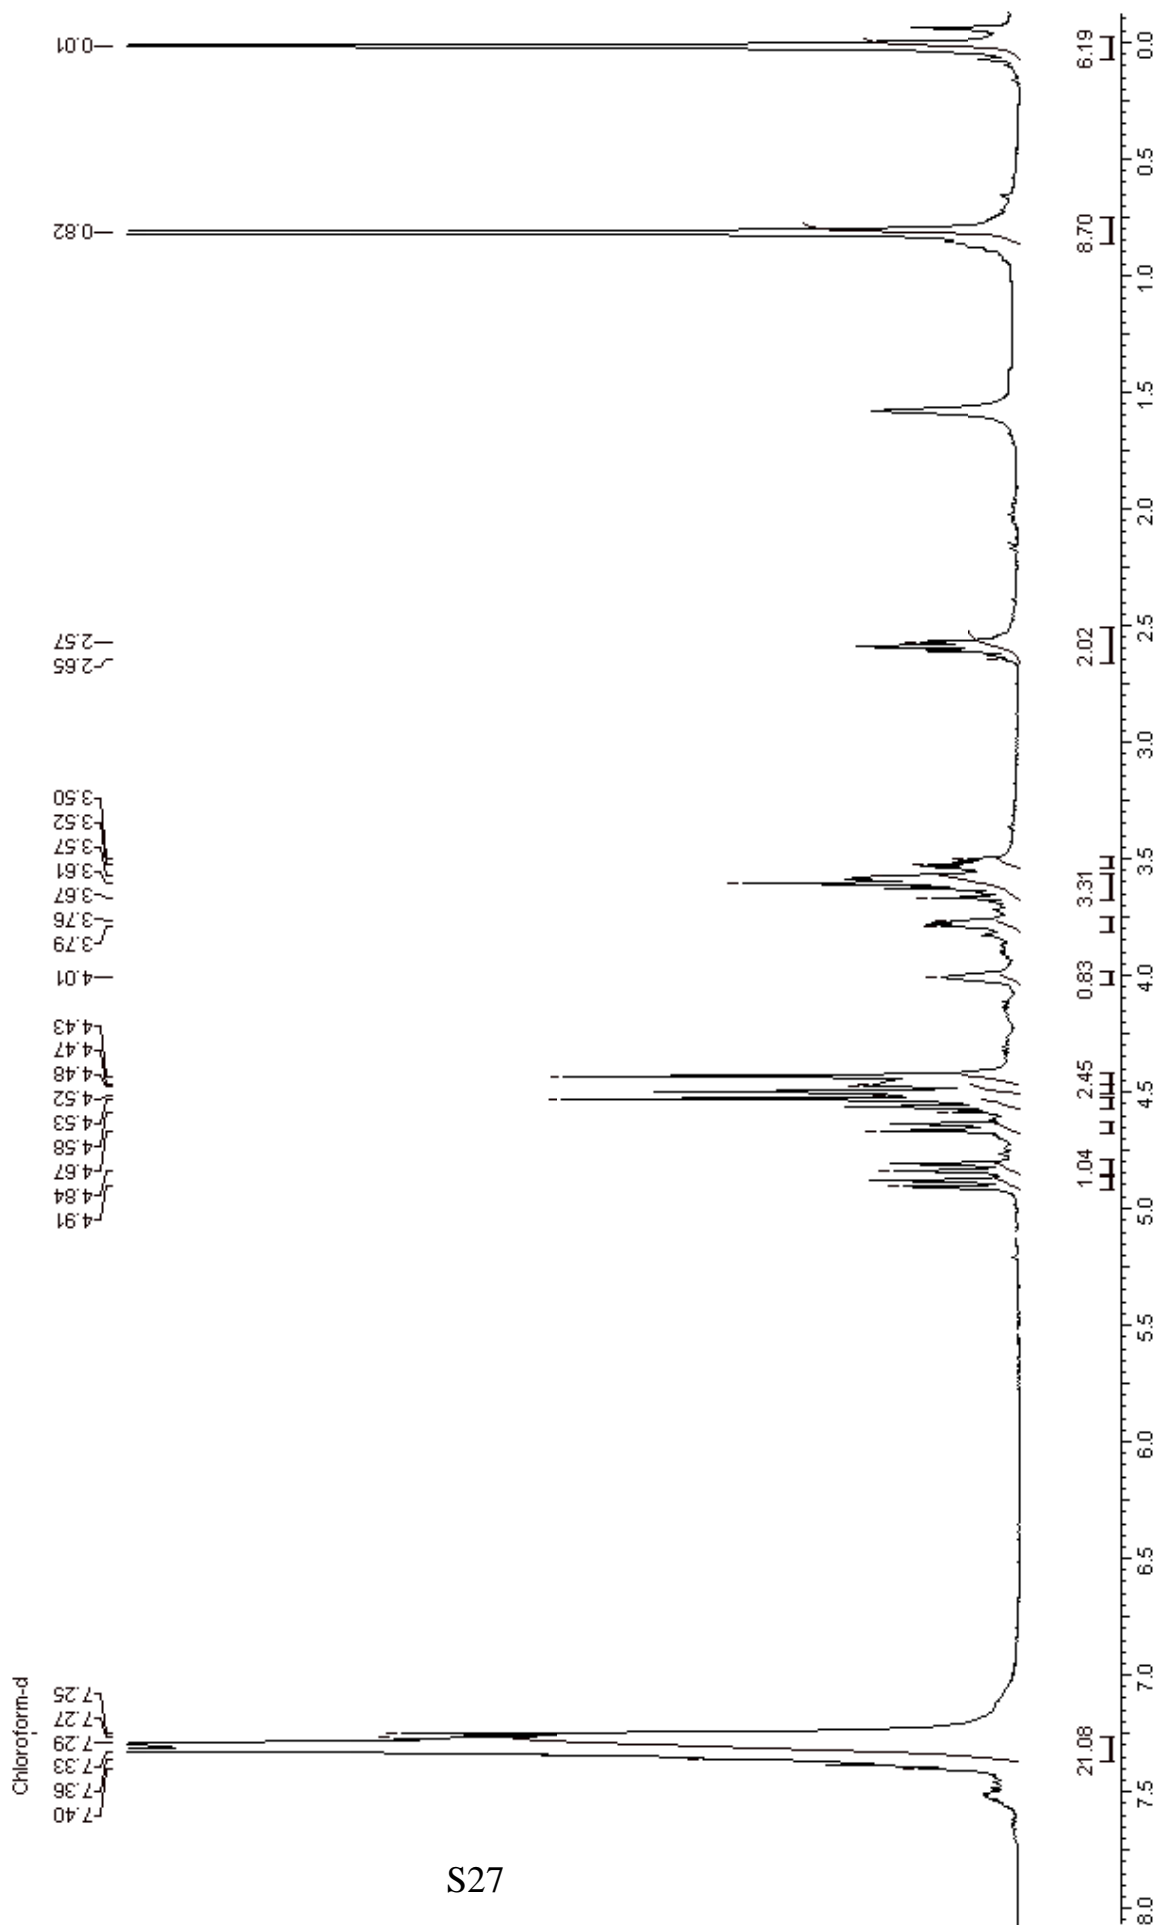

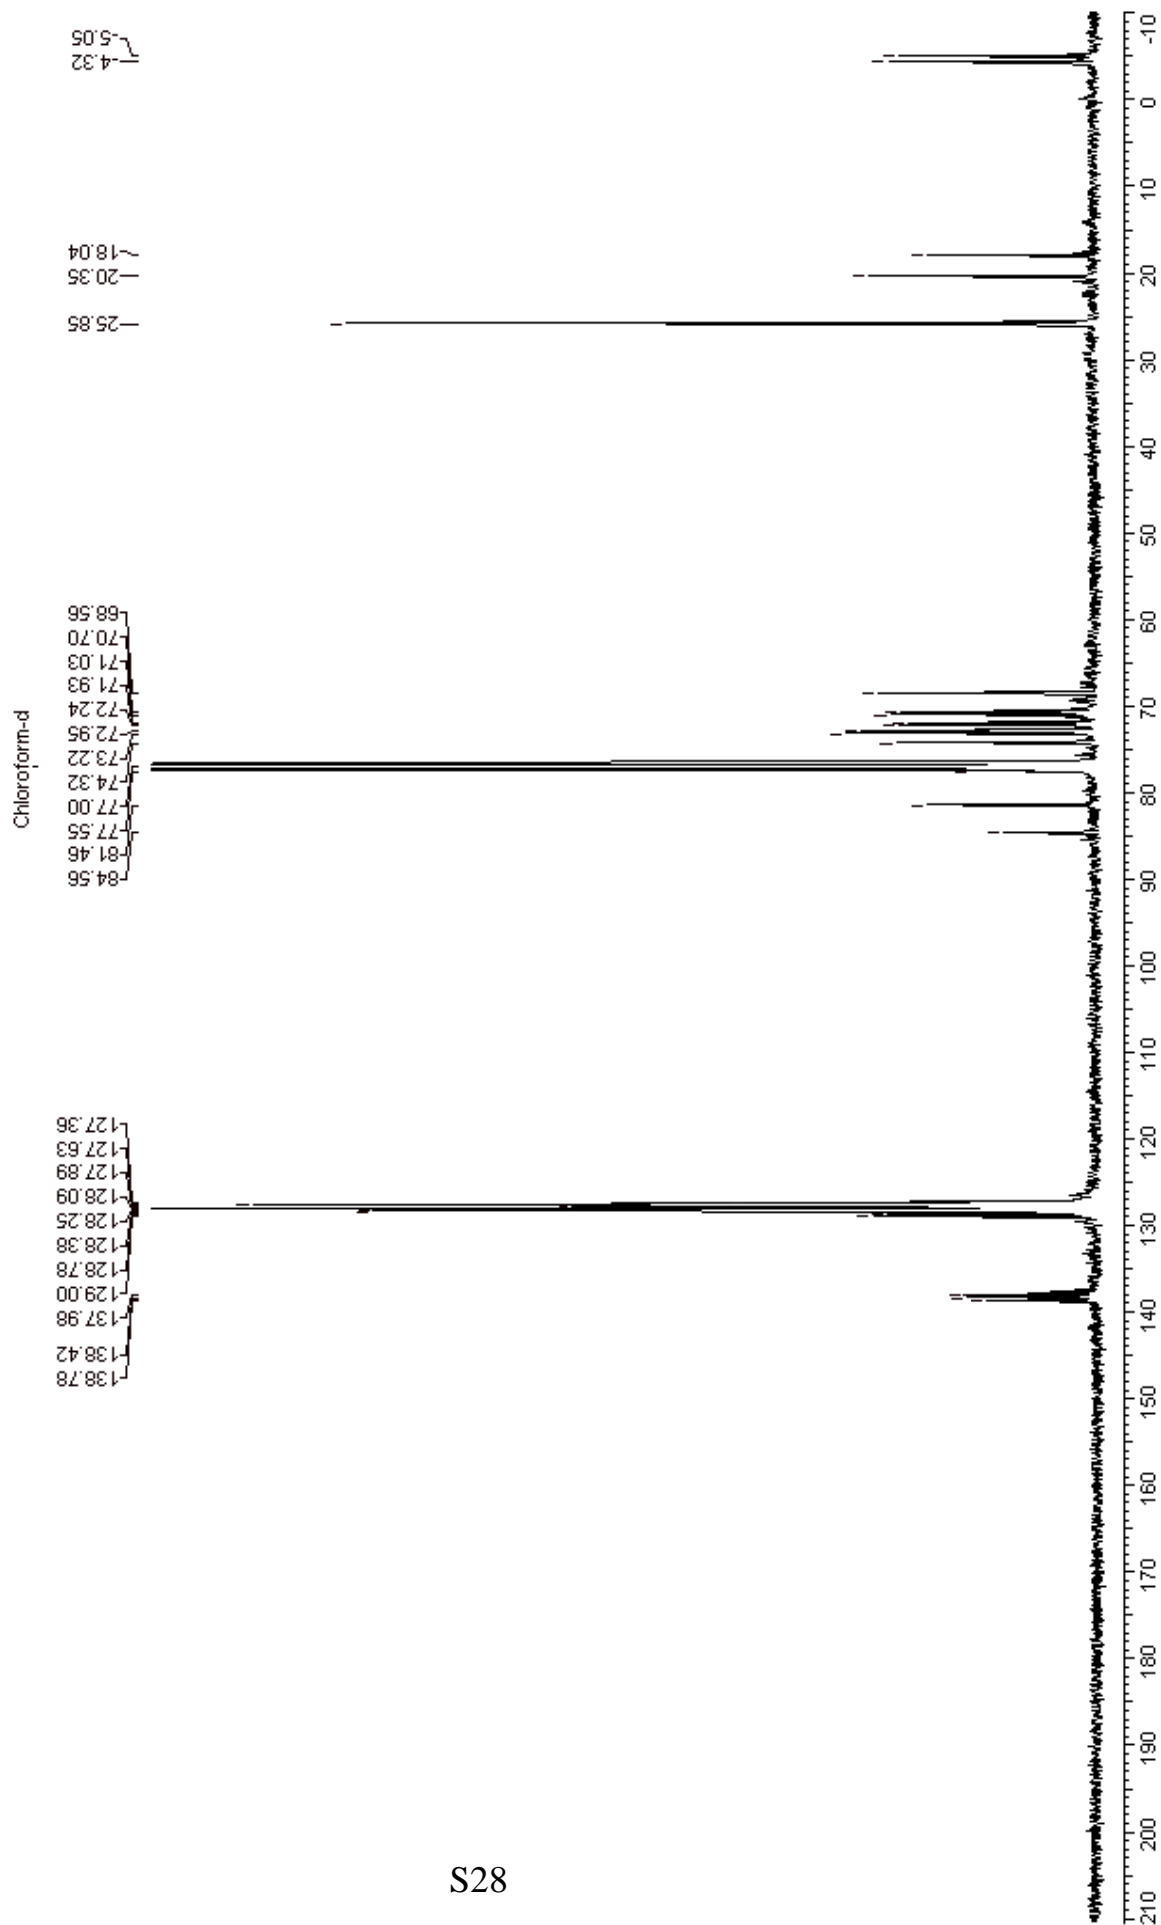

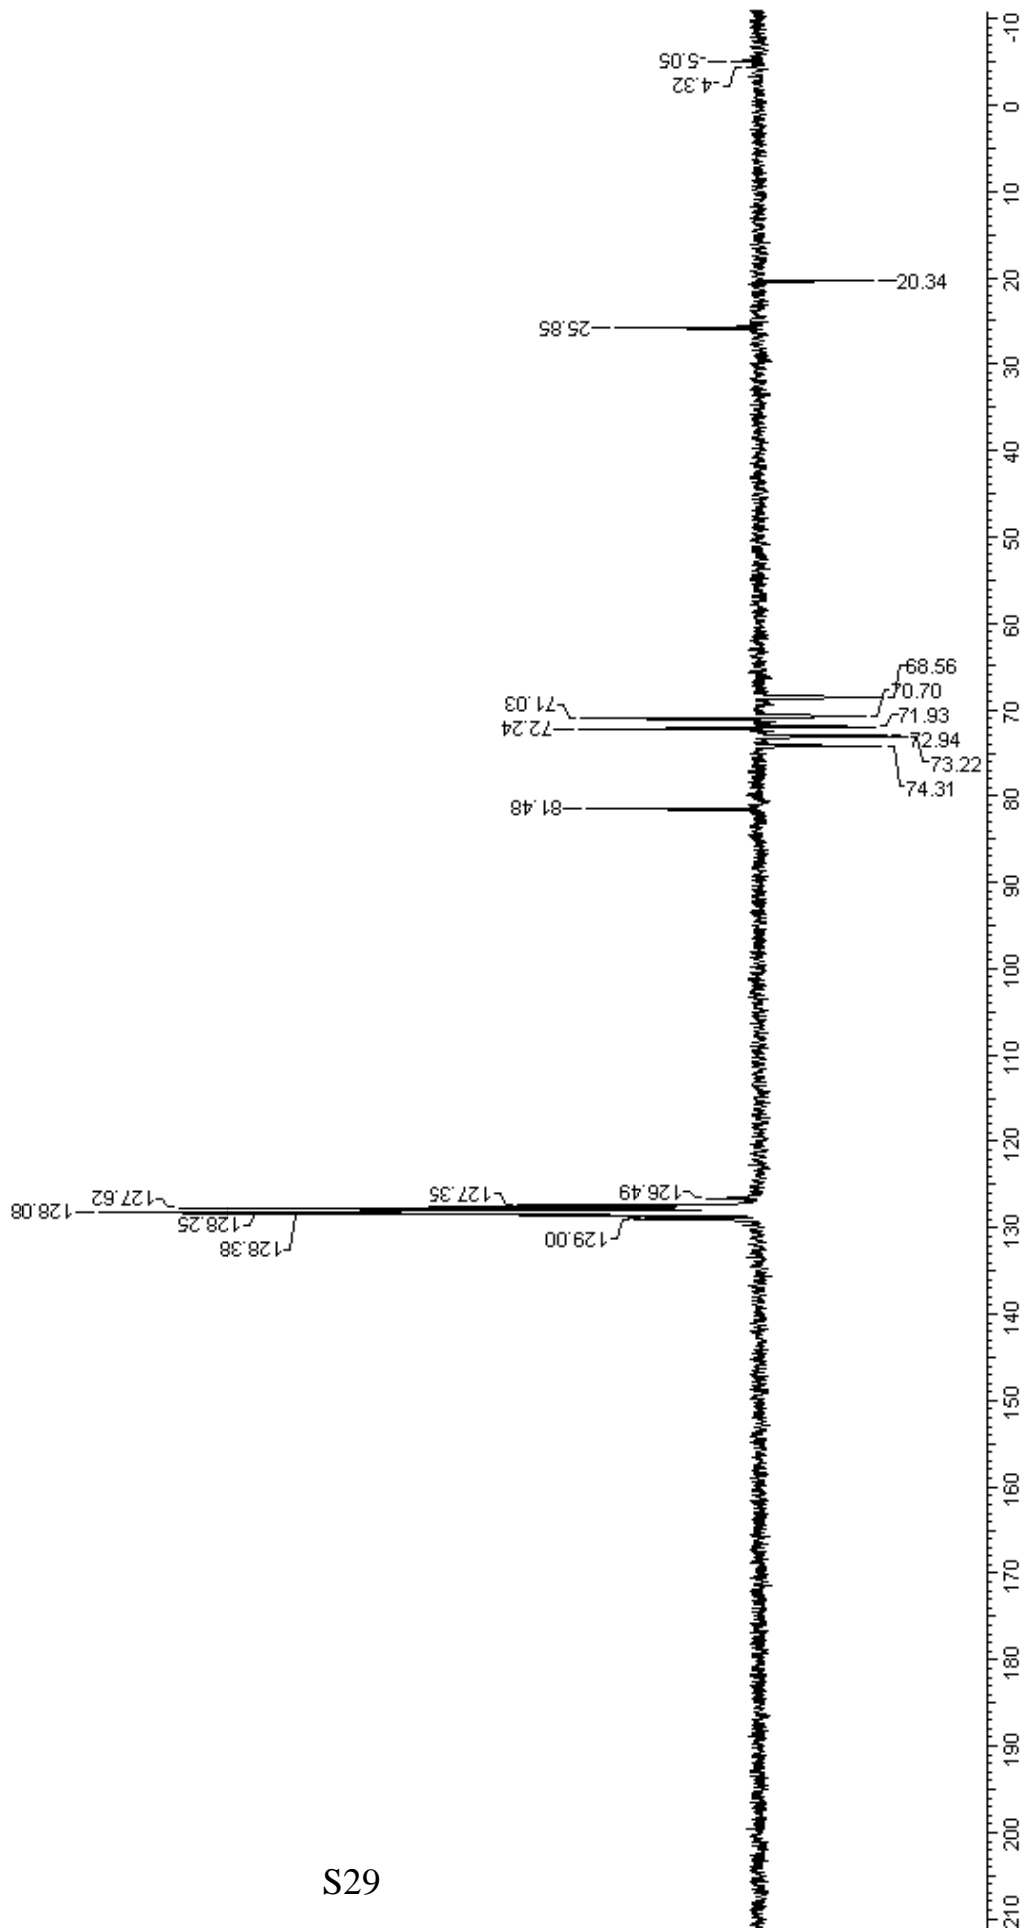

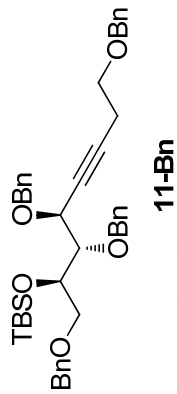

8/10/2010 4:35:49 PM

F:\DATA\RAMANA\SN\_470 / 10 q

SN\_470 #15-44 RT: 0.12-0.38 AV: 30 SB: 39 0.01-0.10, 0.94-1.18 NL: 3.79E6  
I: {0,0} + c ESI corona sid=80.00 det=1200.00 Full ms [200.00-800.00]

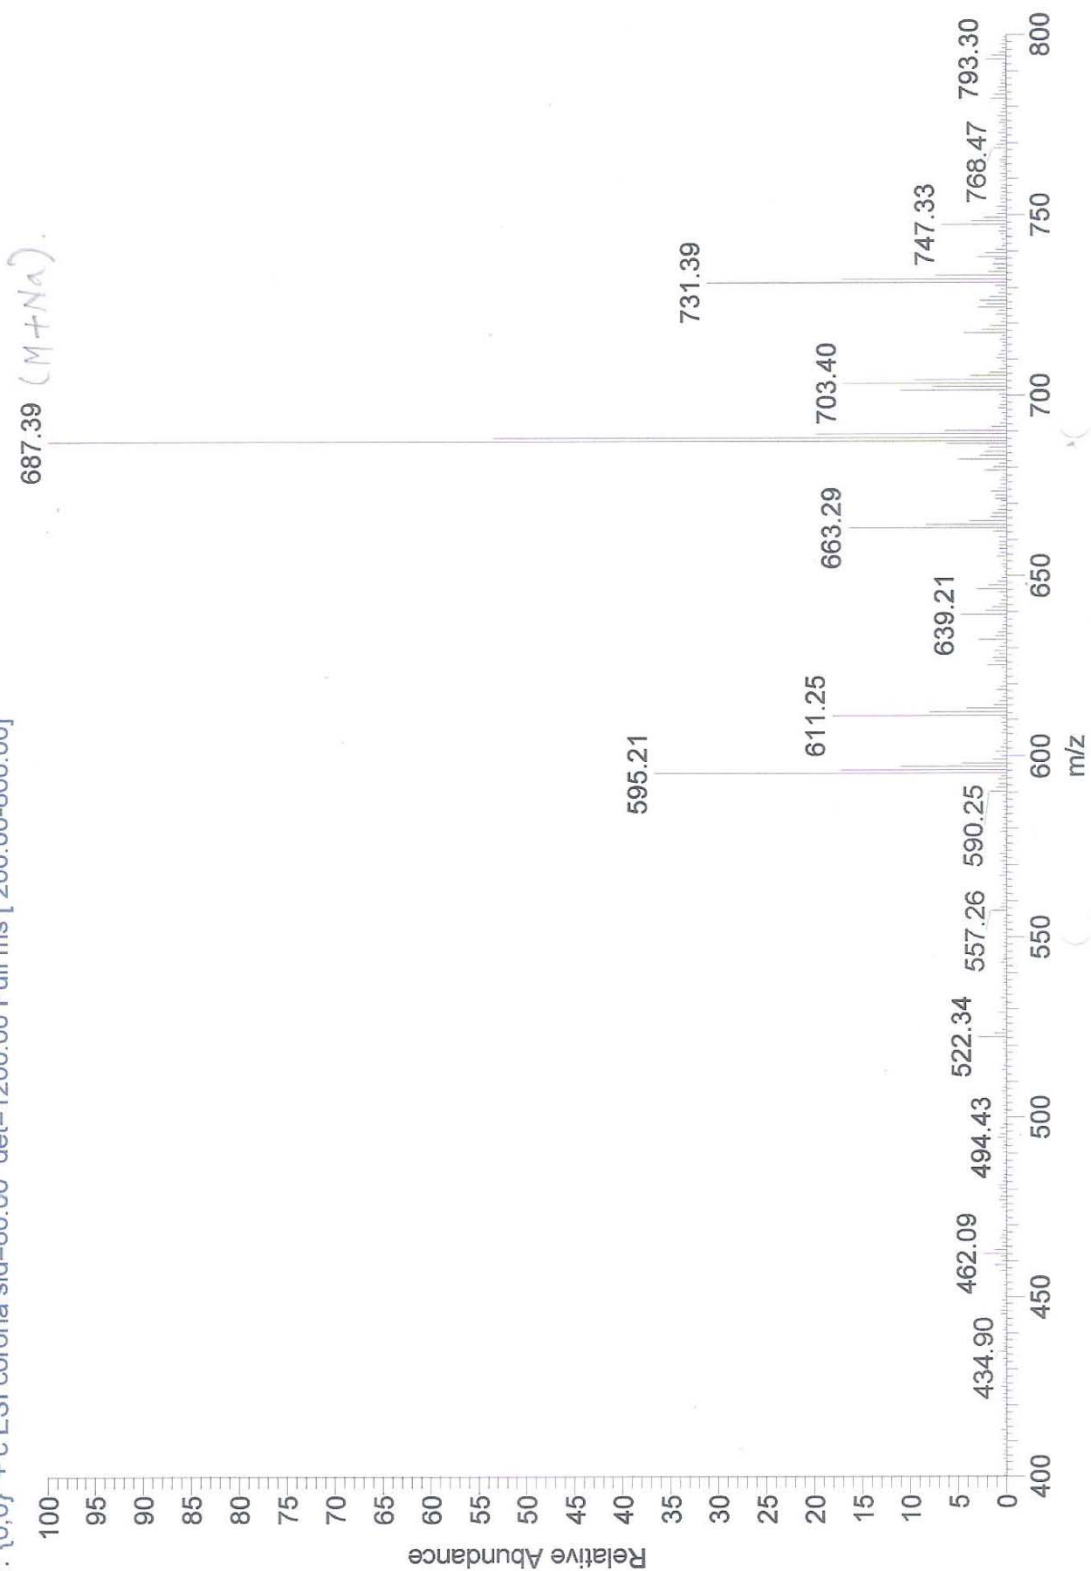

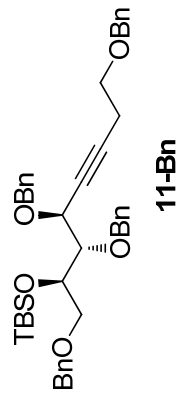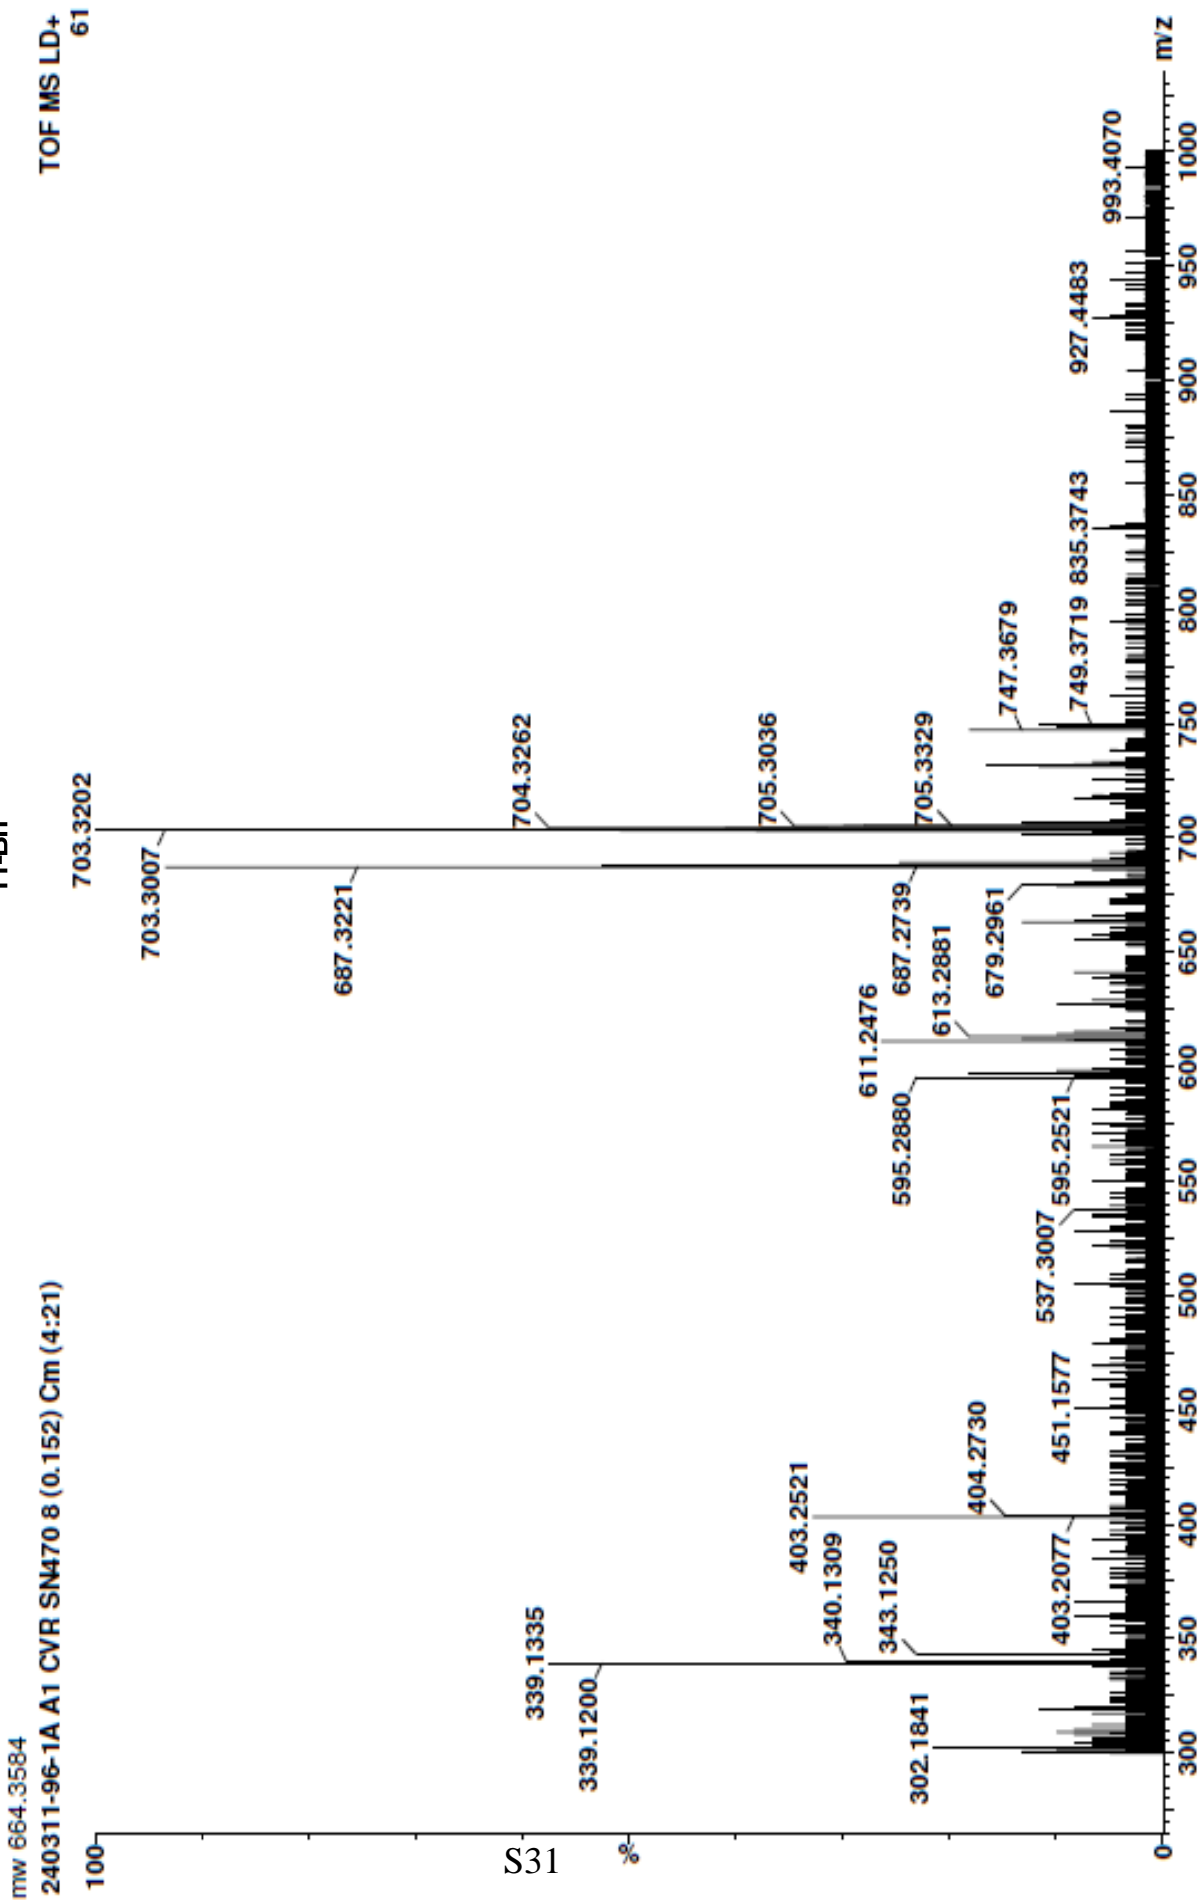

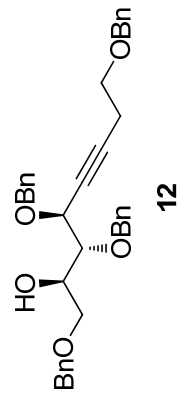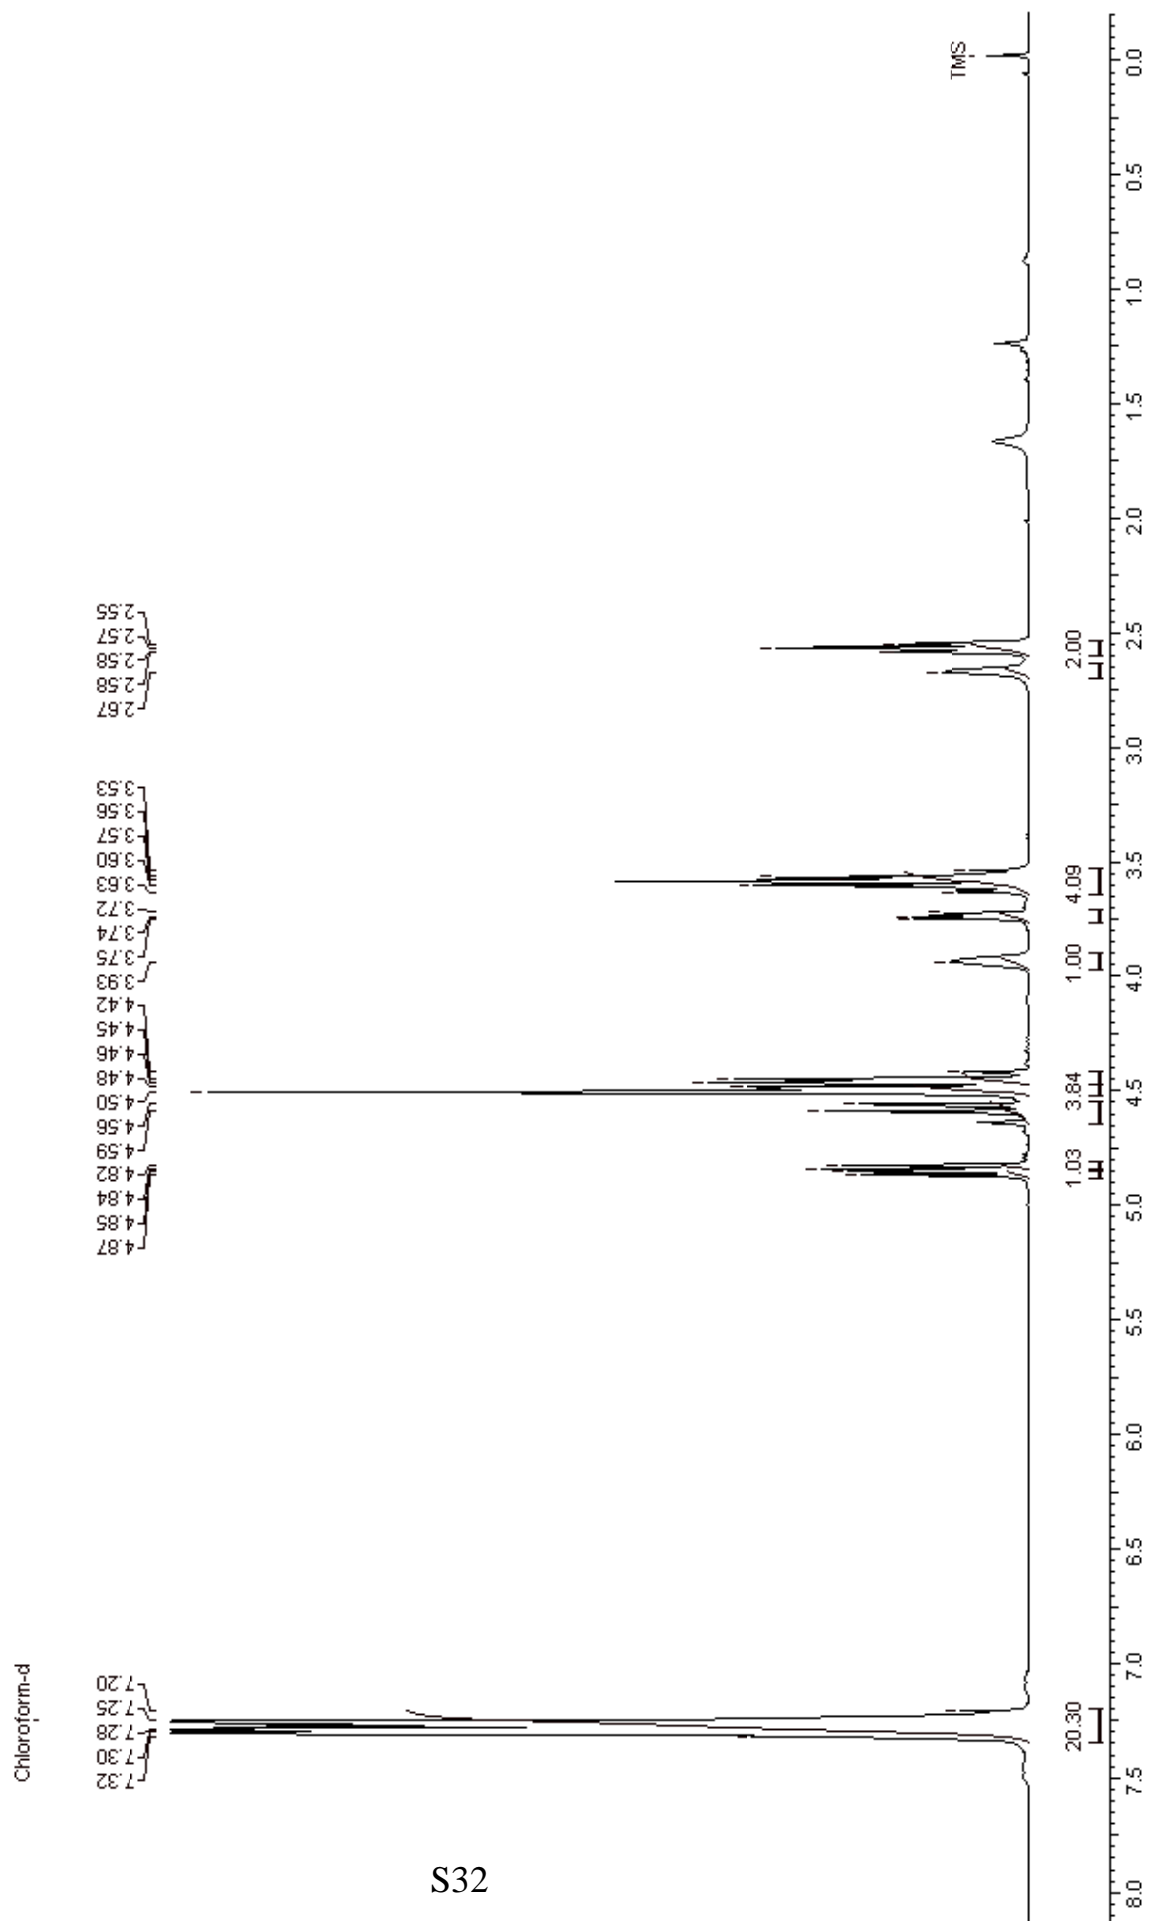



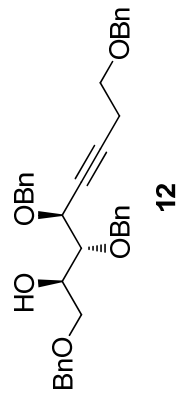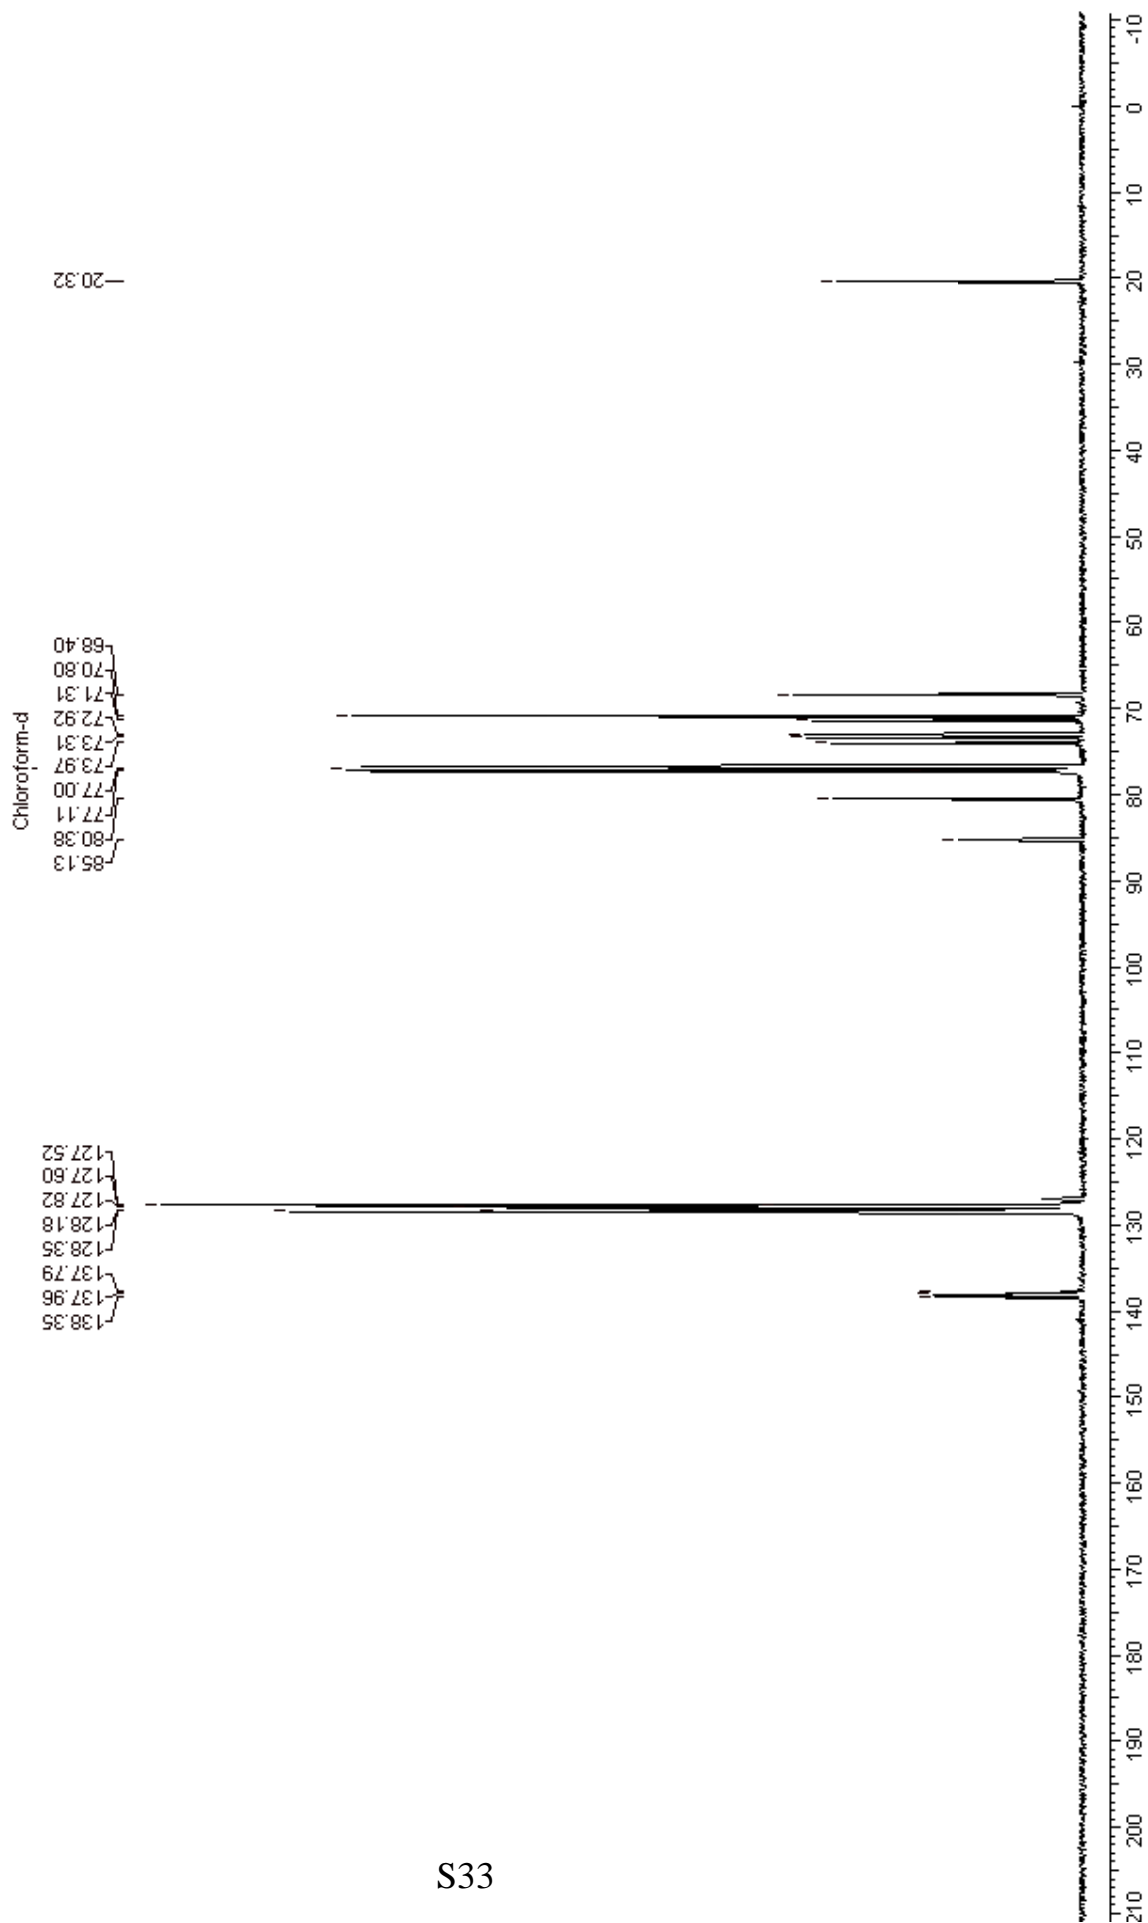

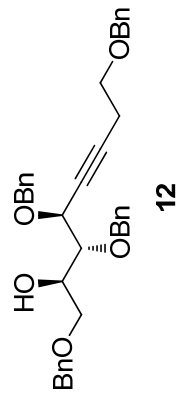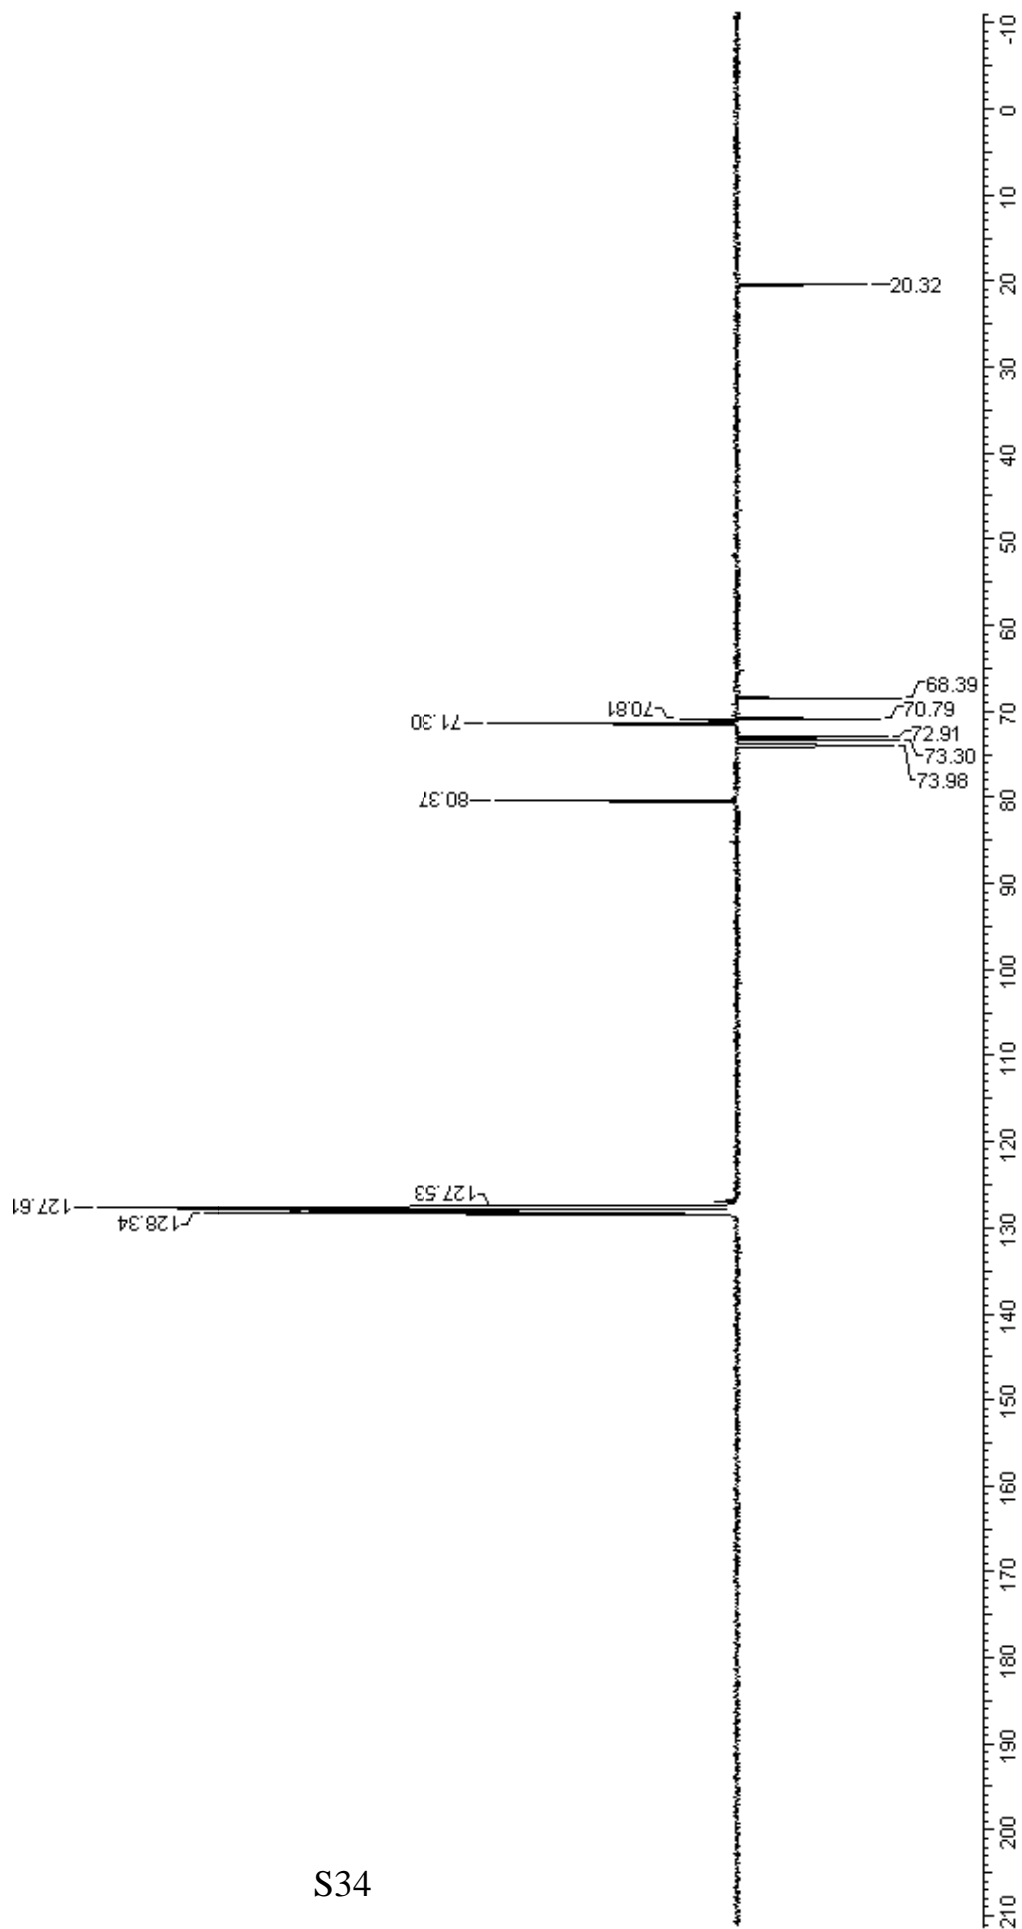

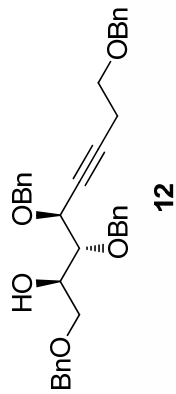

SN\_472 / 11

\*LCMSMS - Q STAR PULSAR

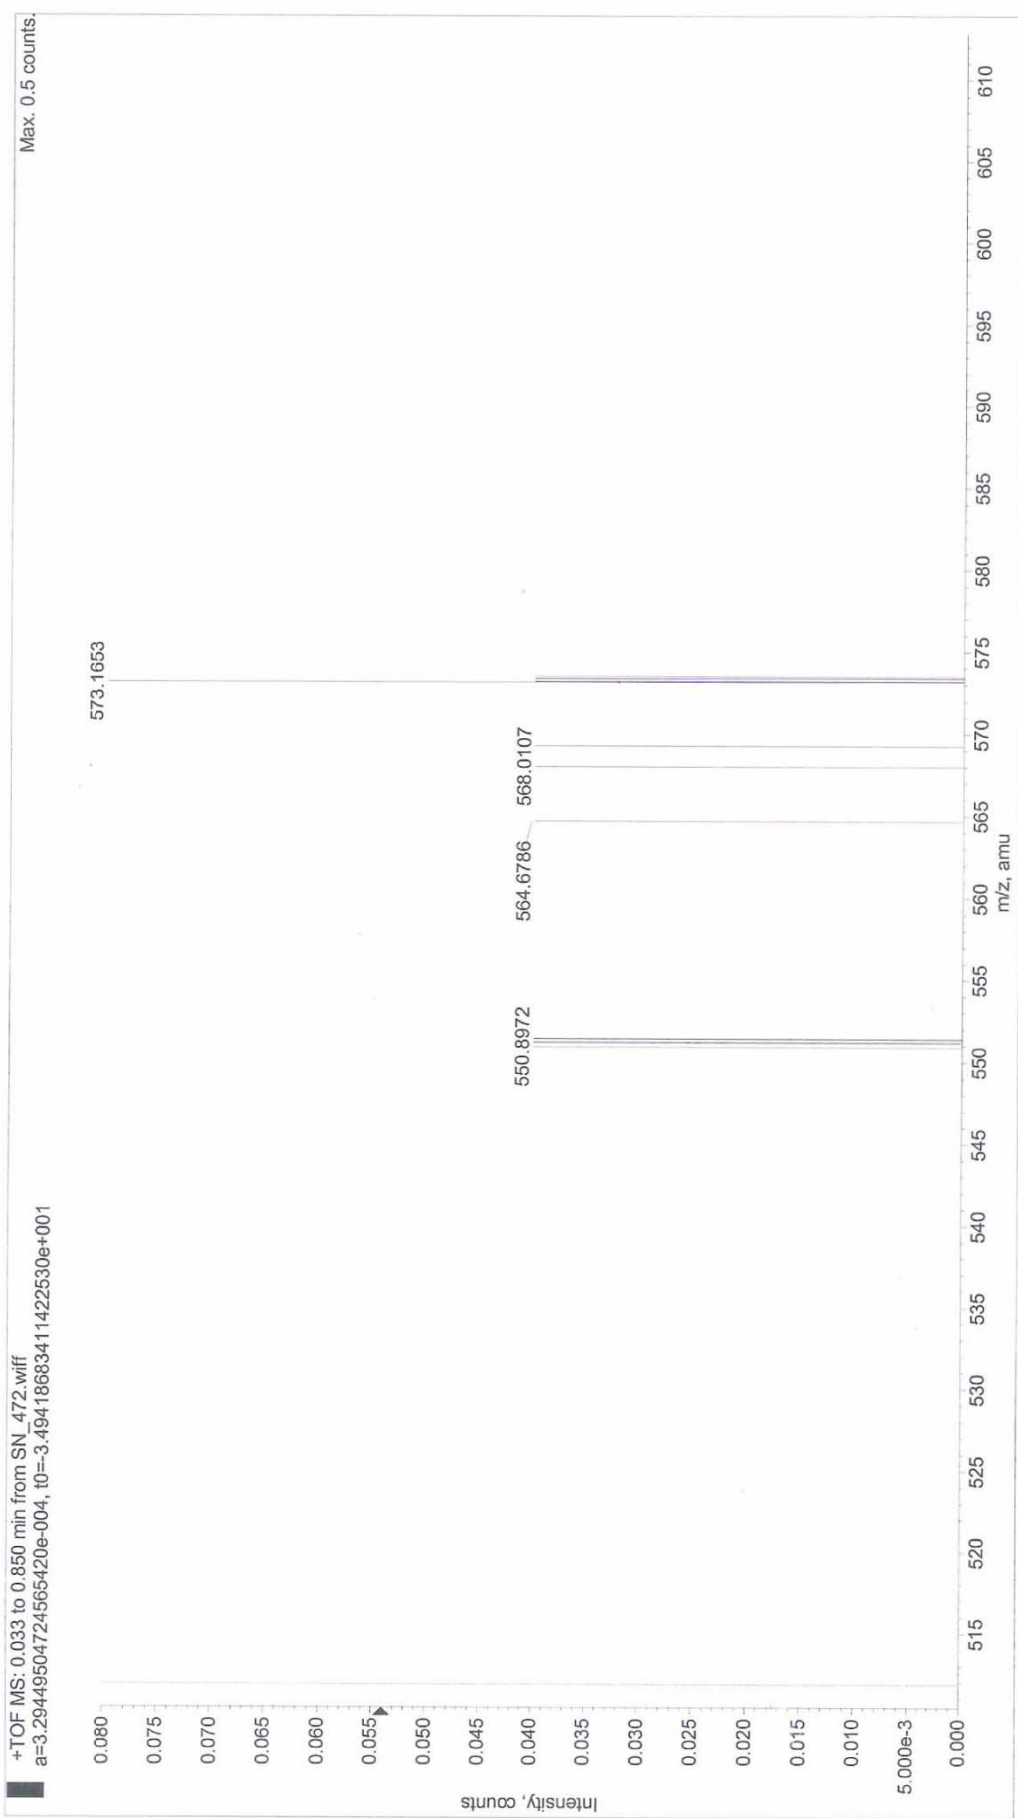

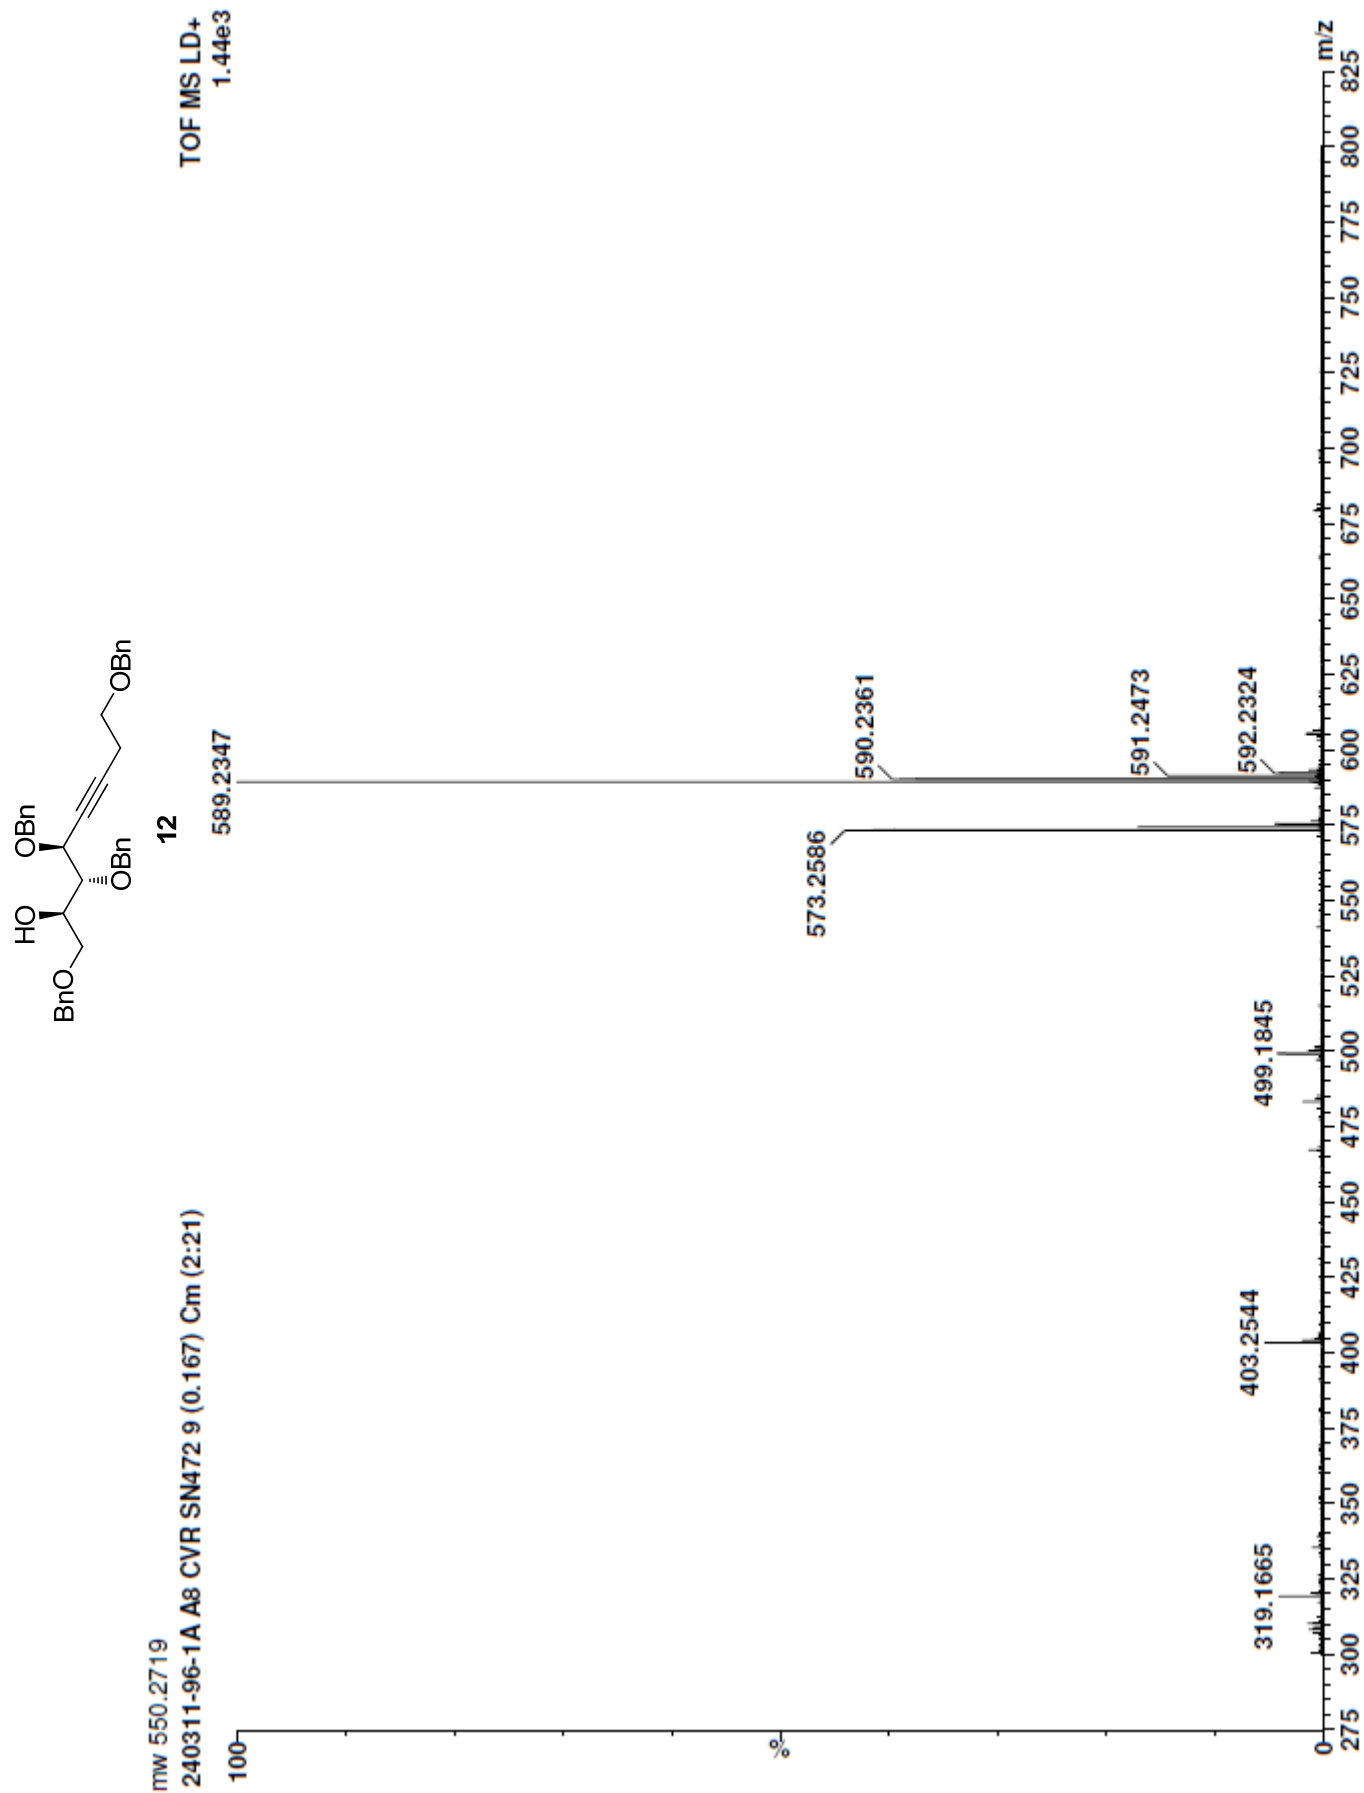

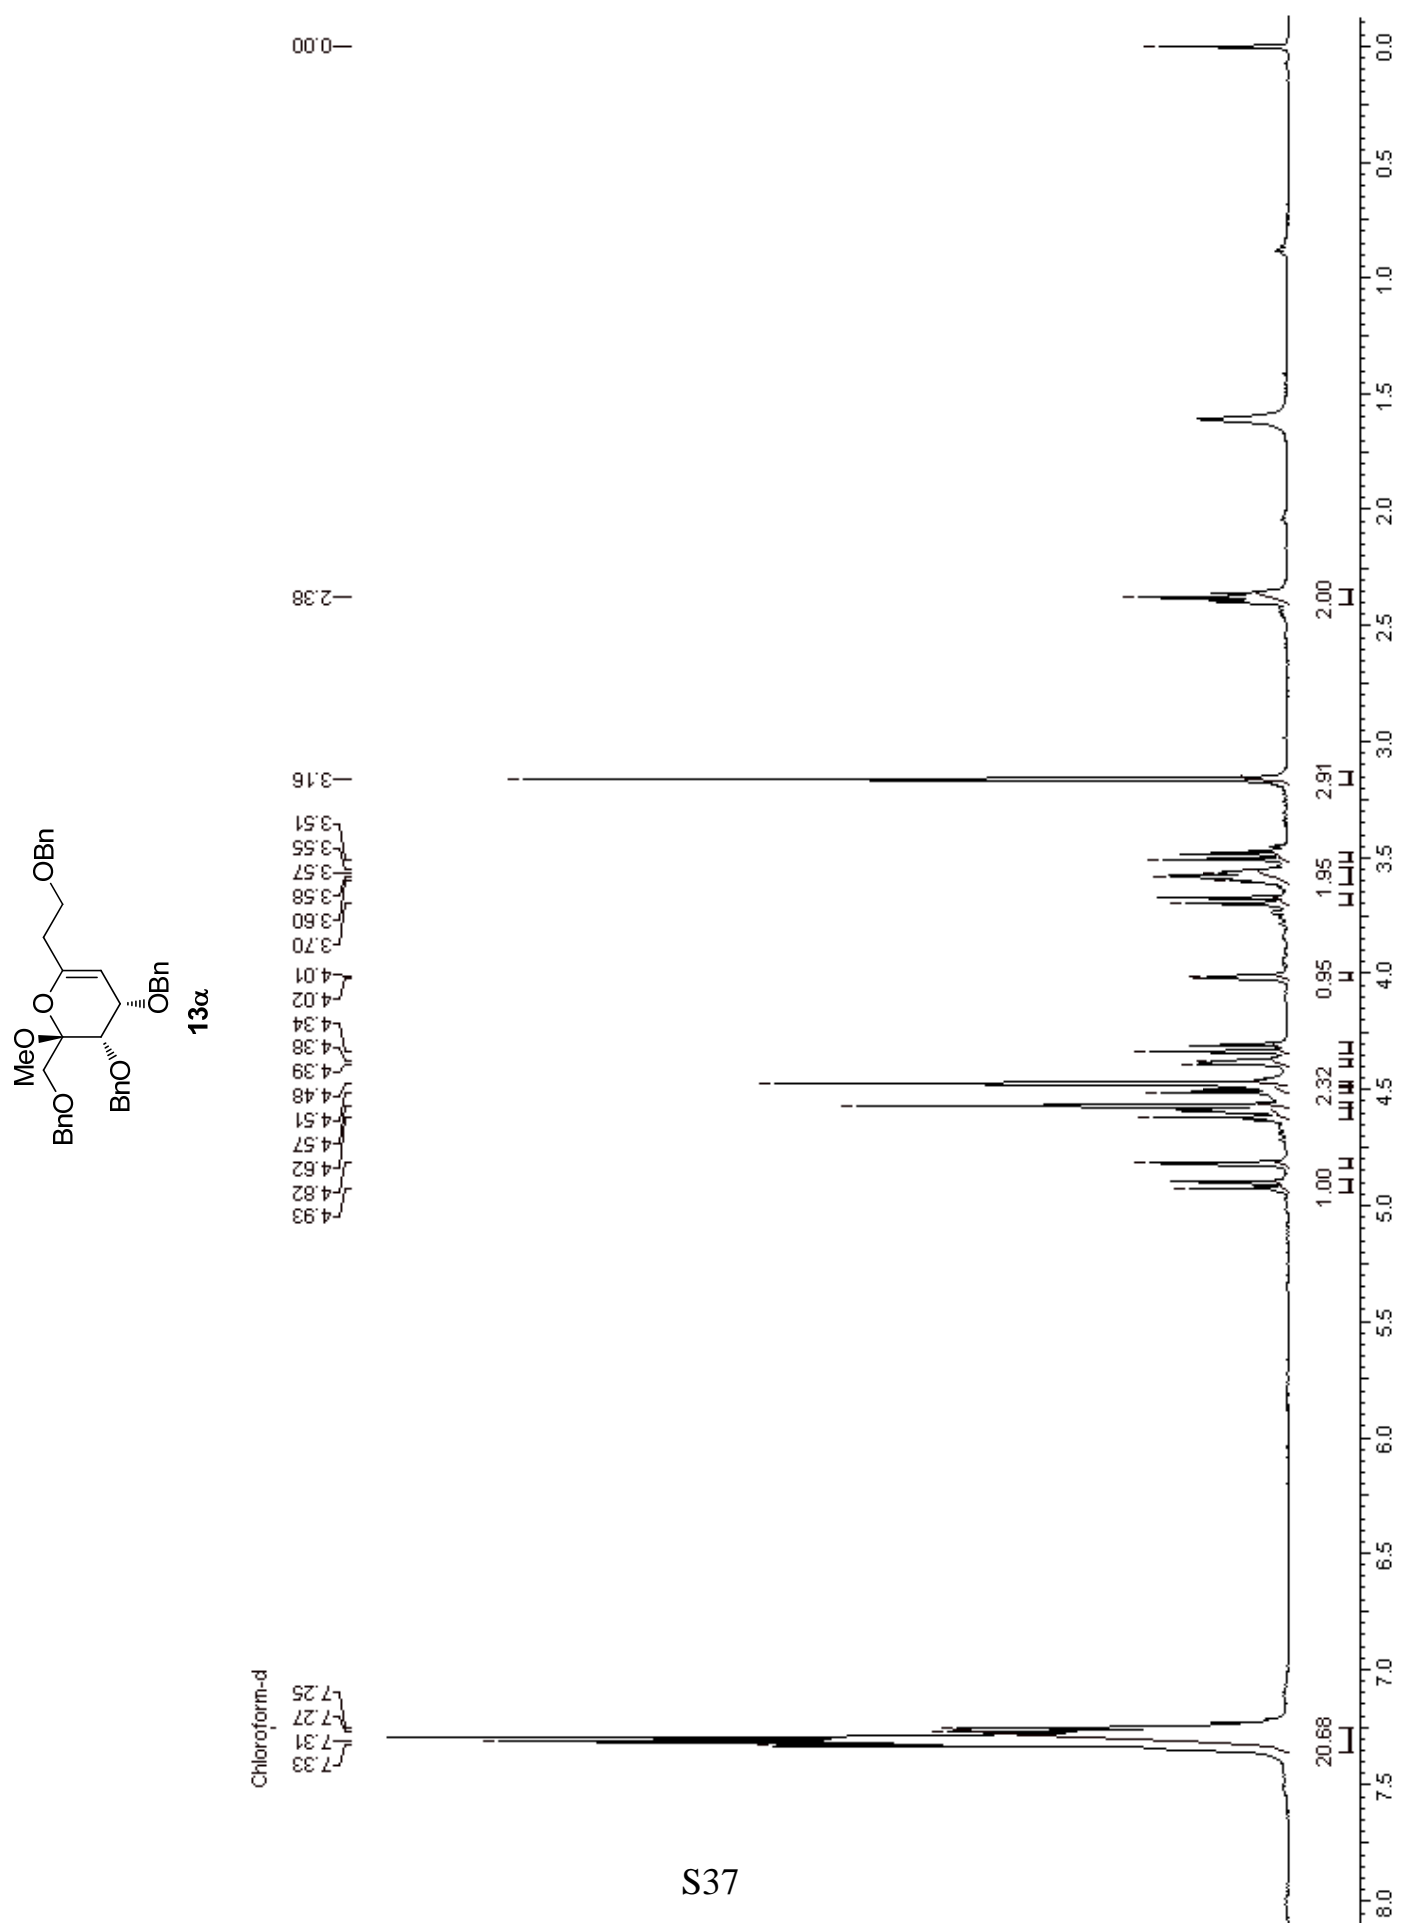

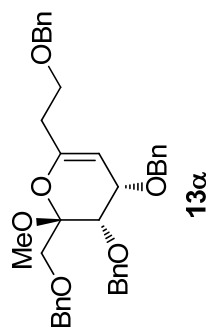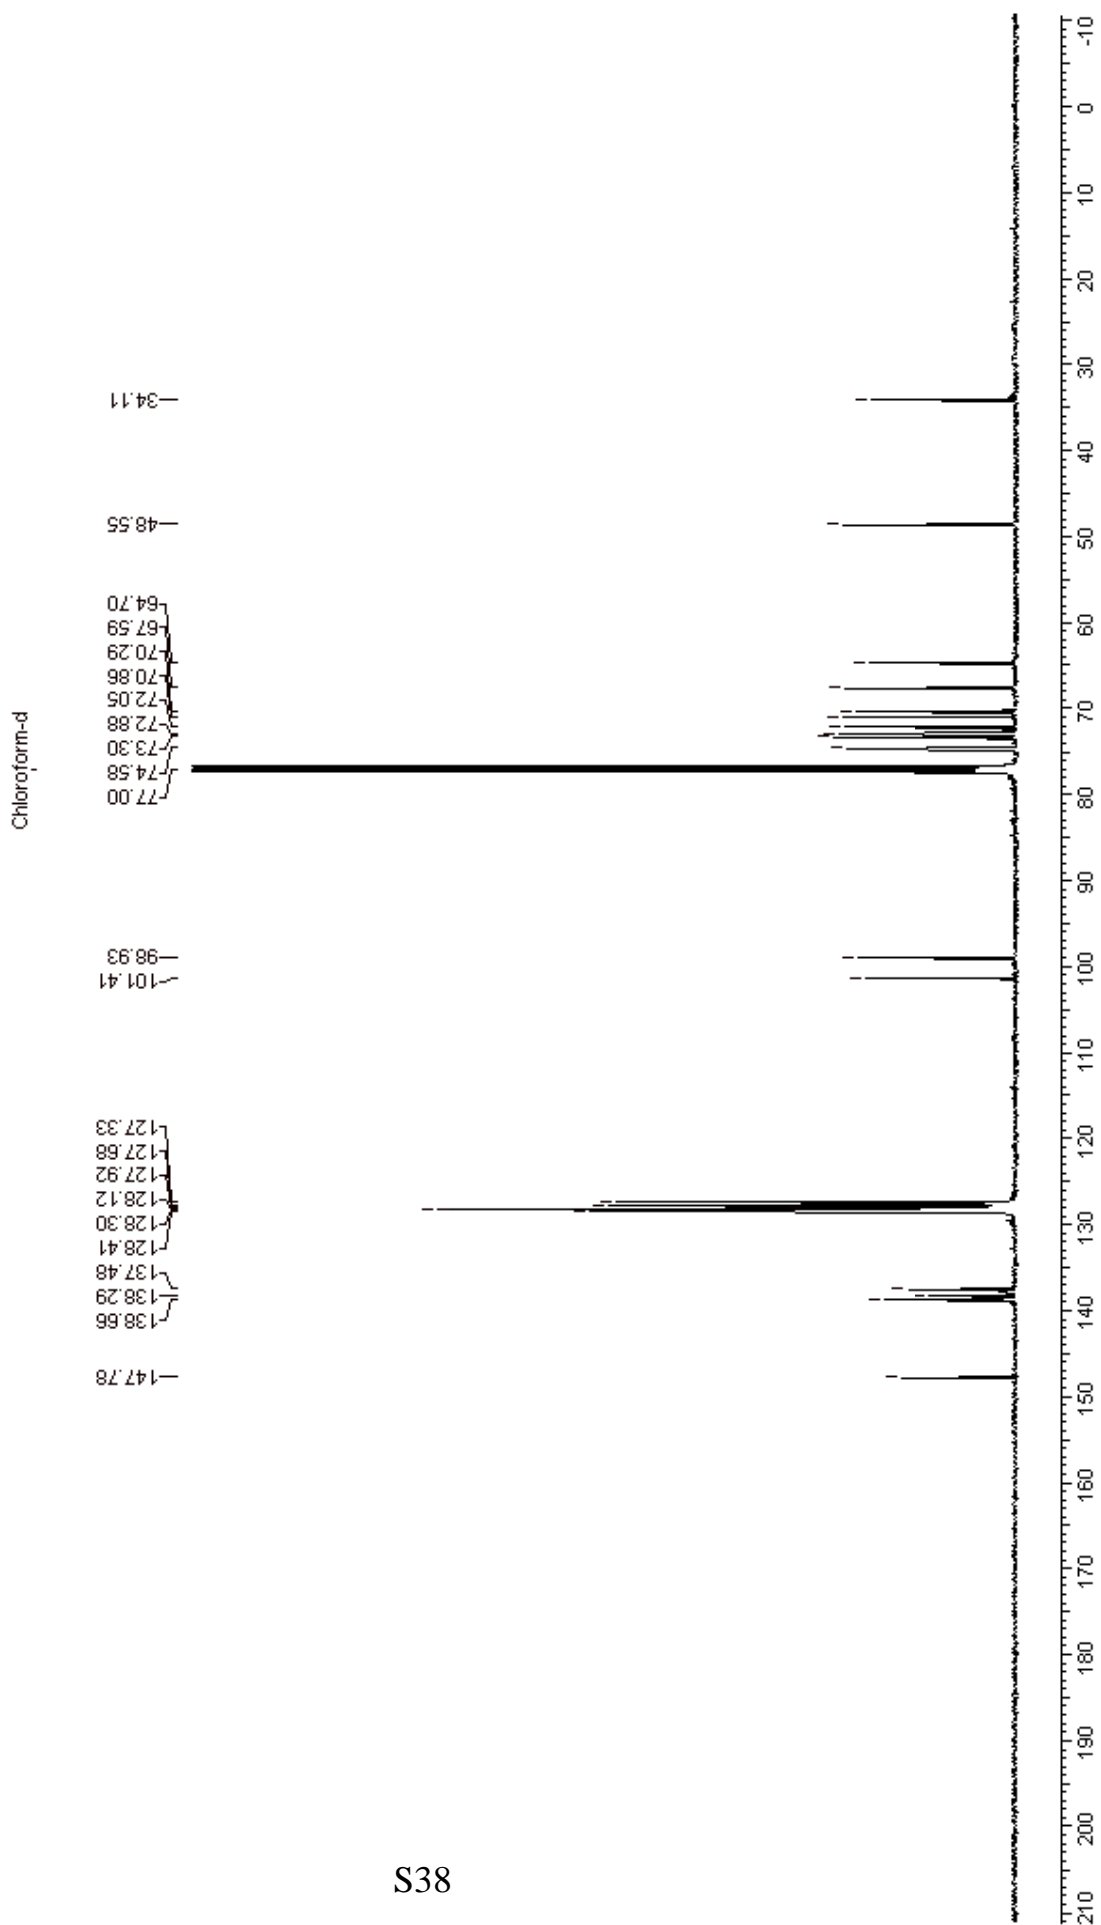

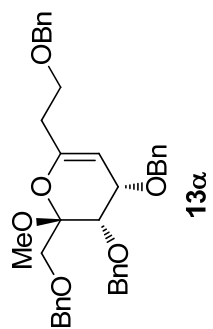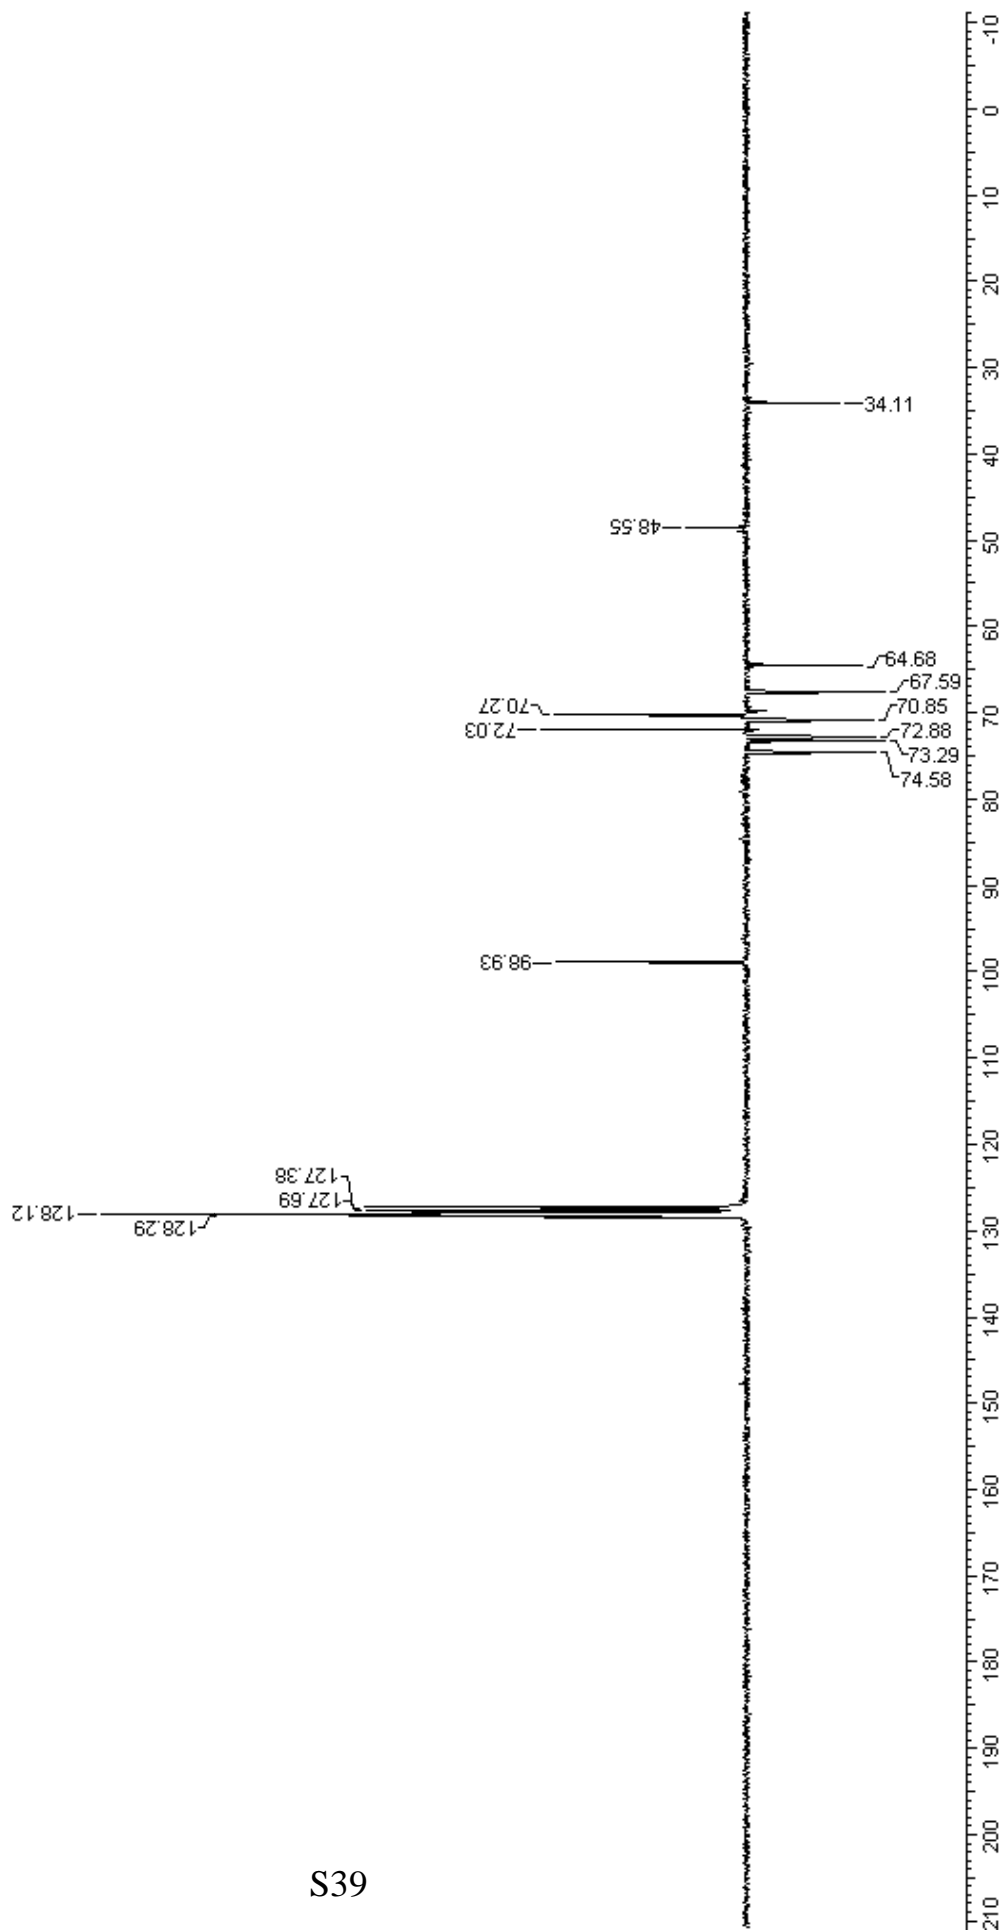

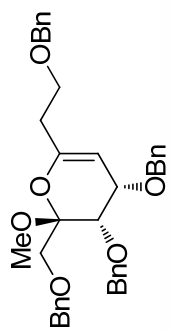

Final - Shots 750 **13a**; Run #90; Label O8

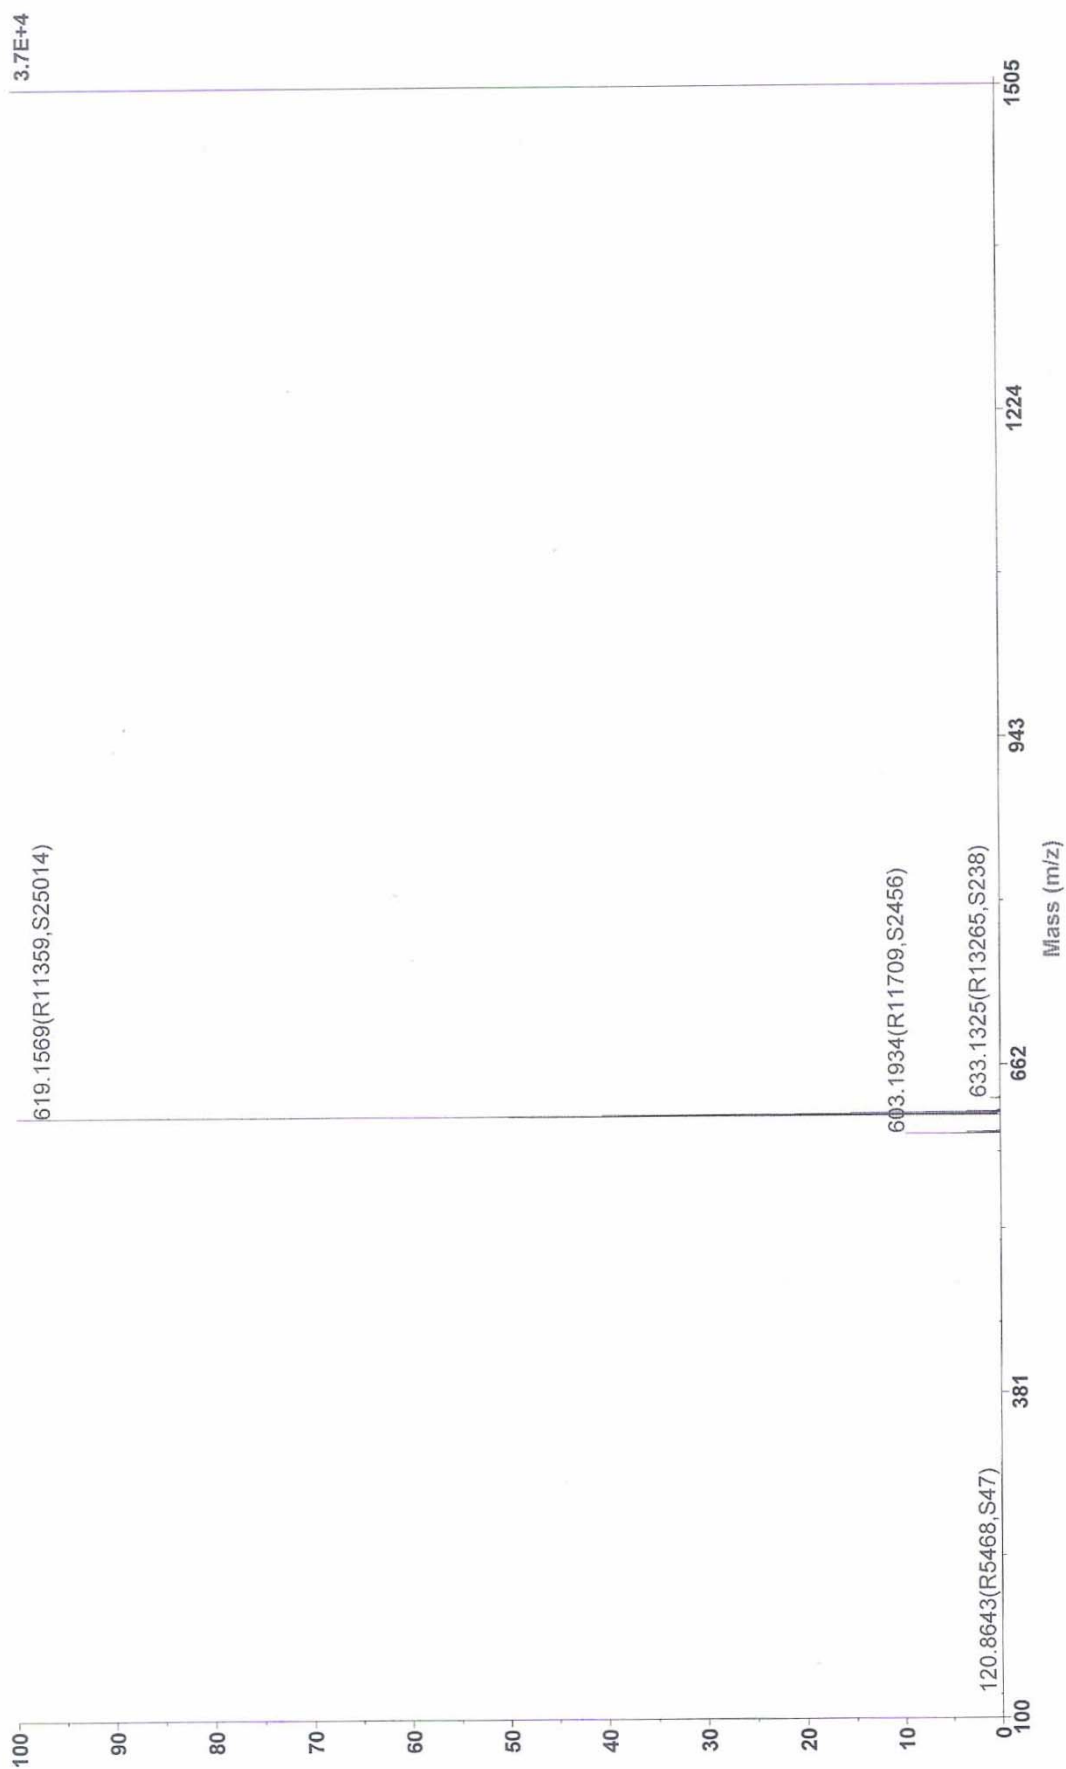



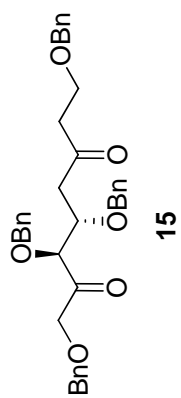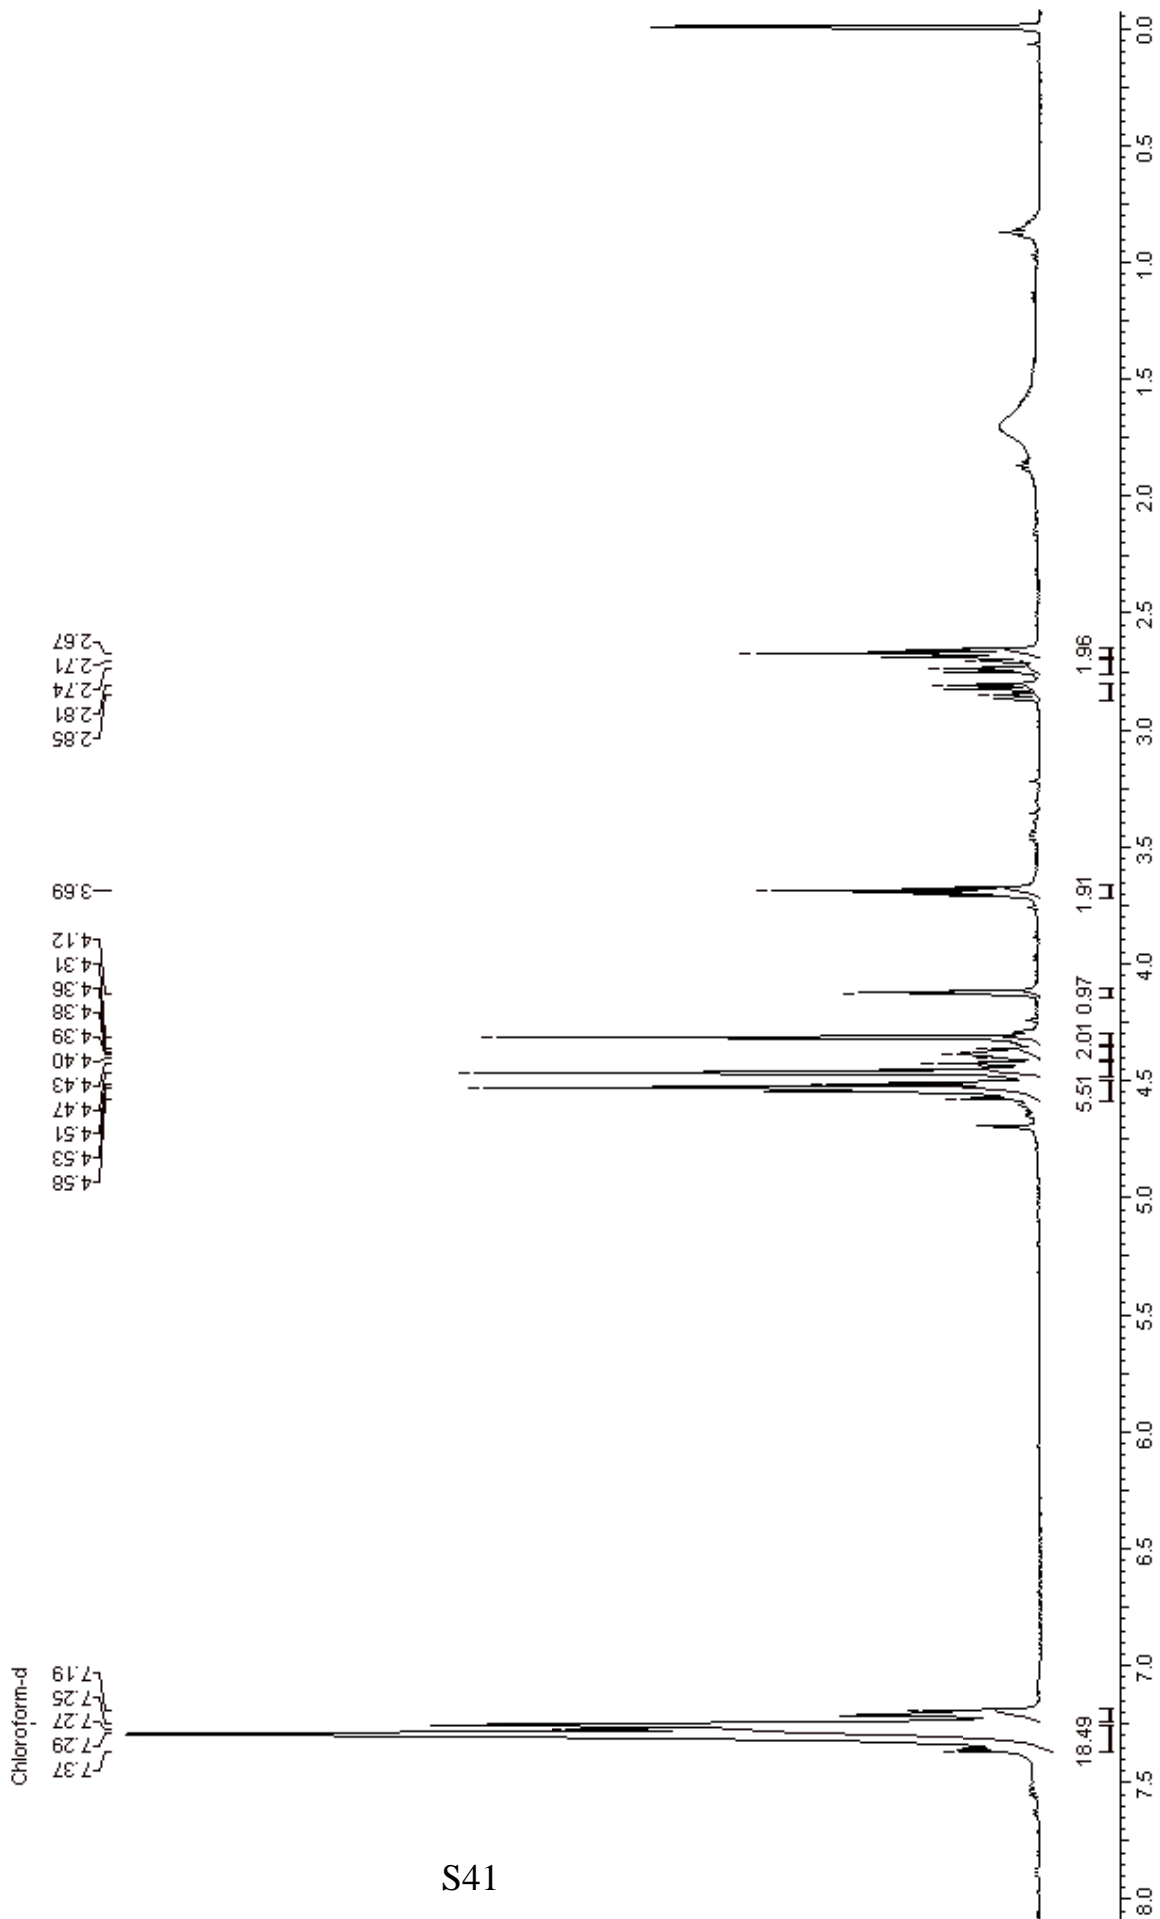

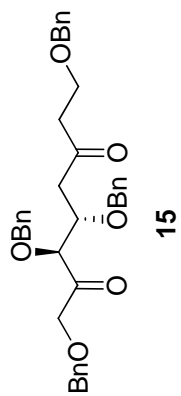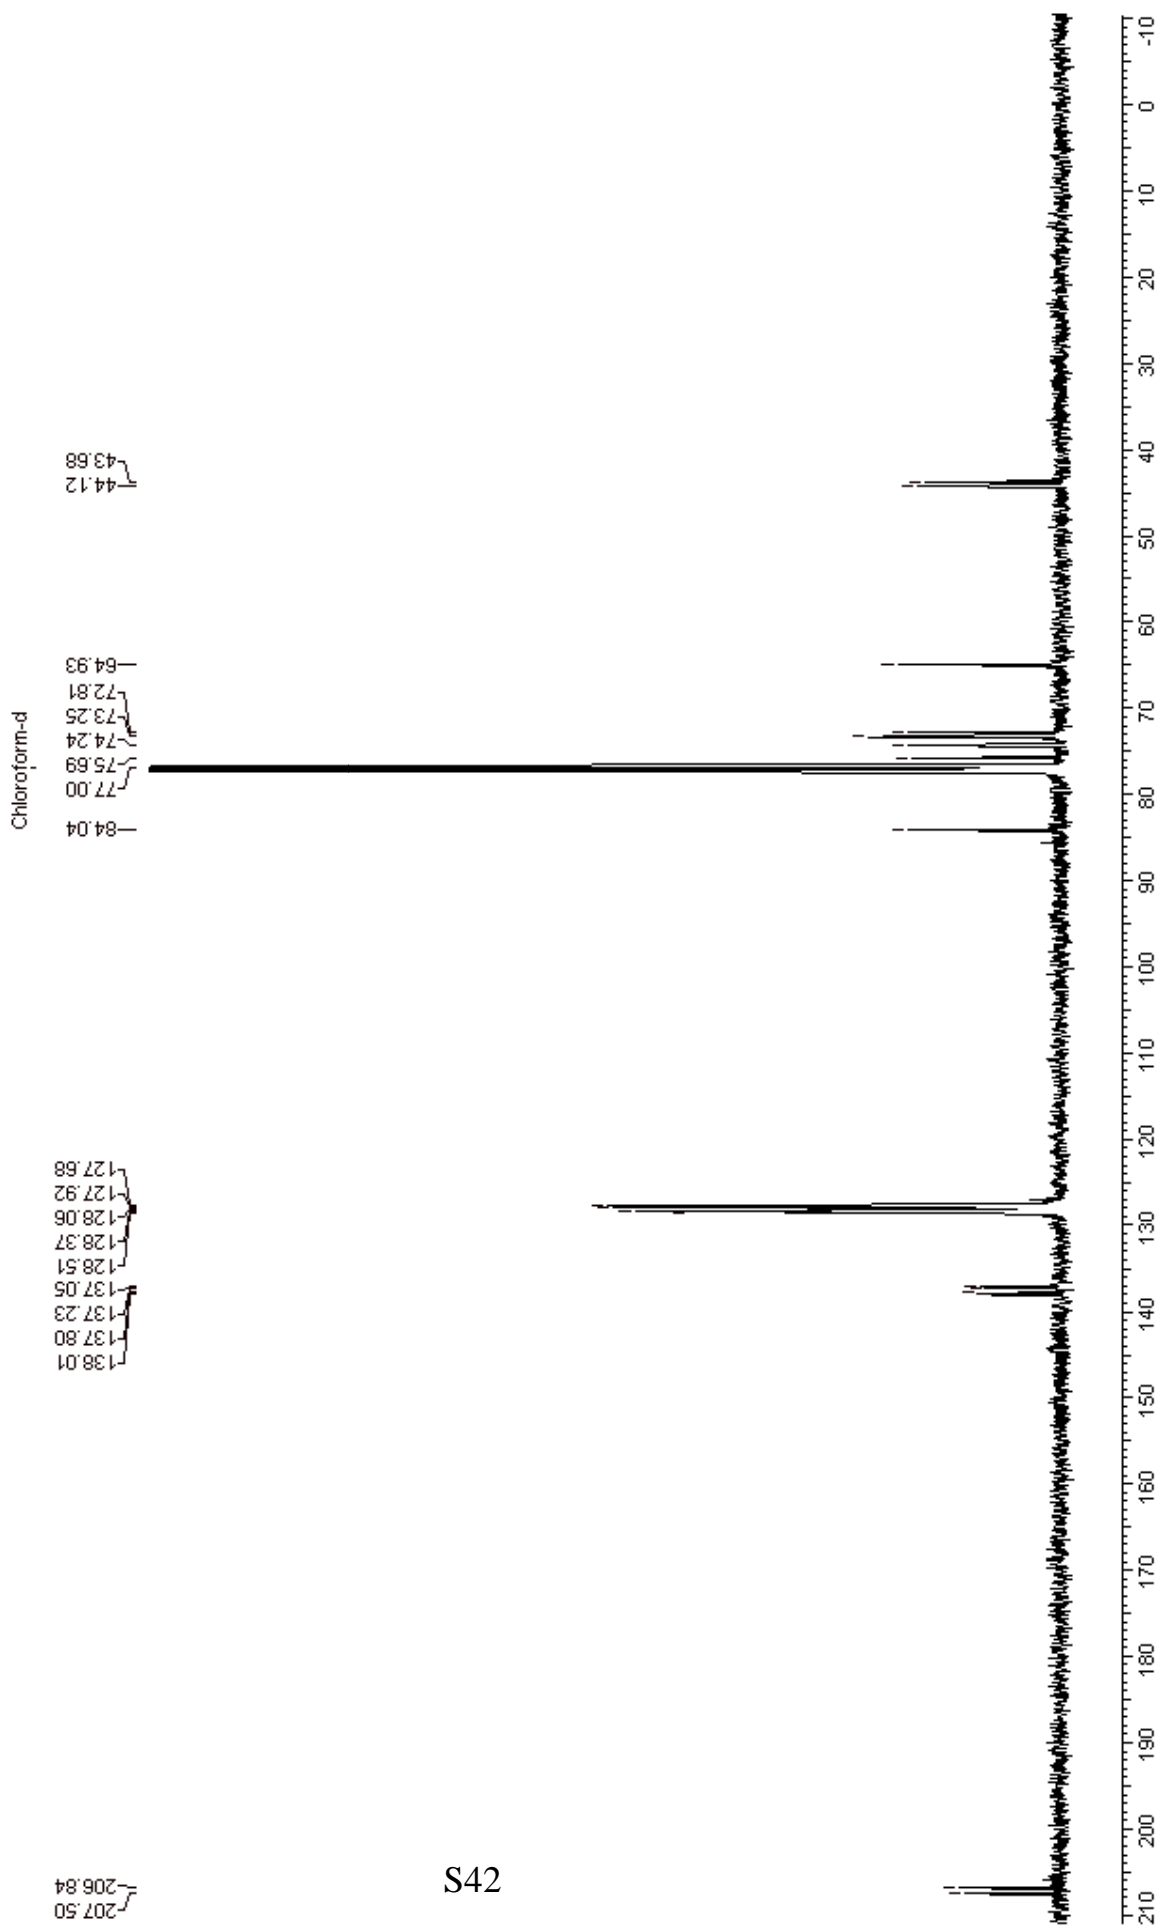

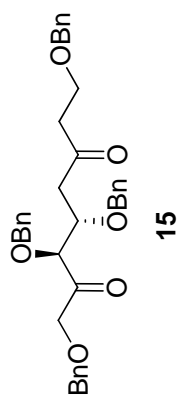

15

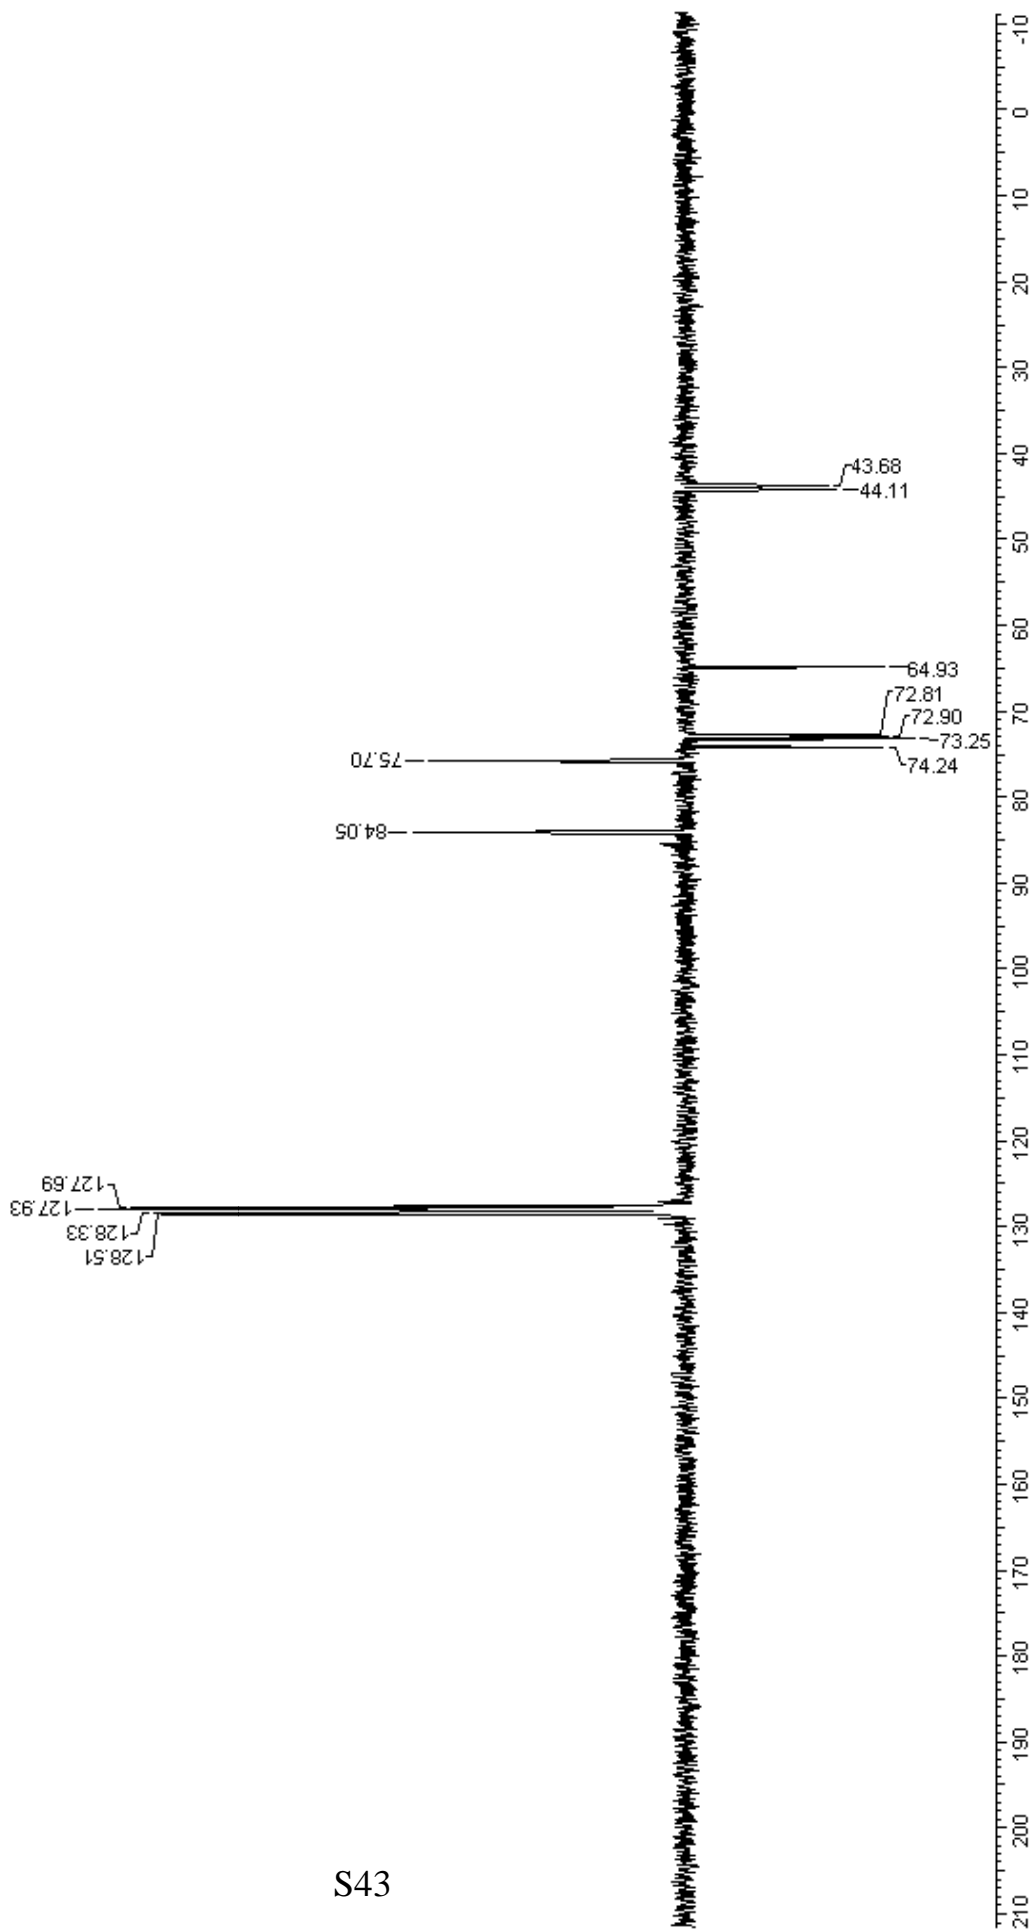

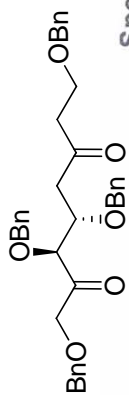

15

### Spectrum Report

Final - Shots 750 - IISER; Run #90; Label O7

SN-476 (A) /  
Reamanged

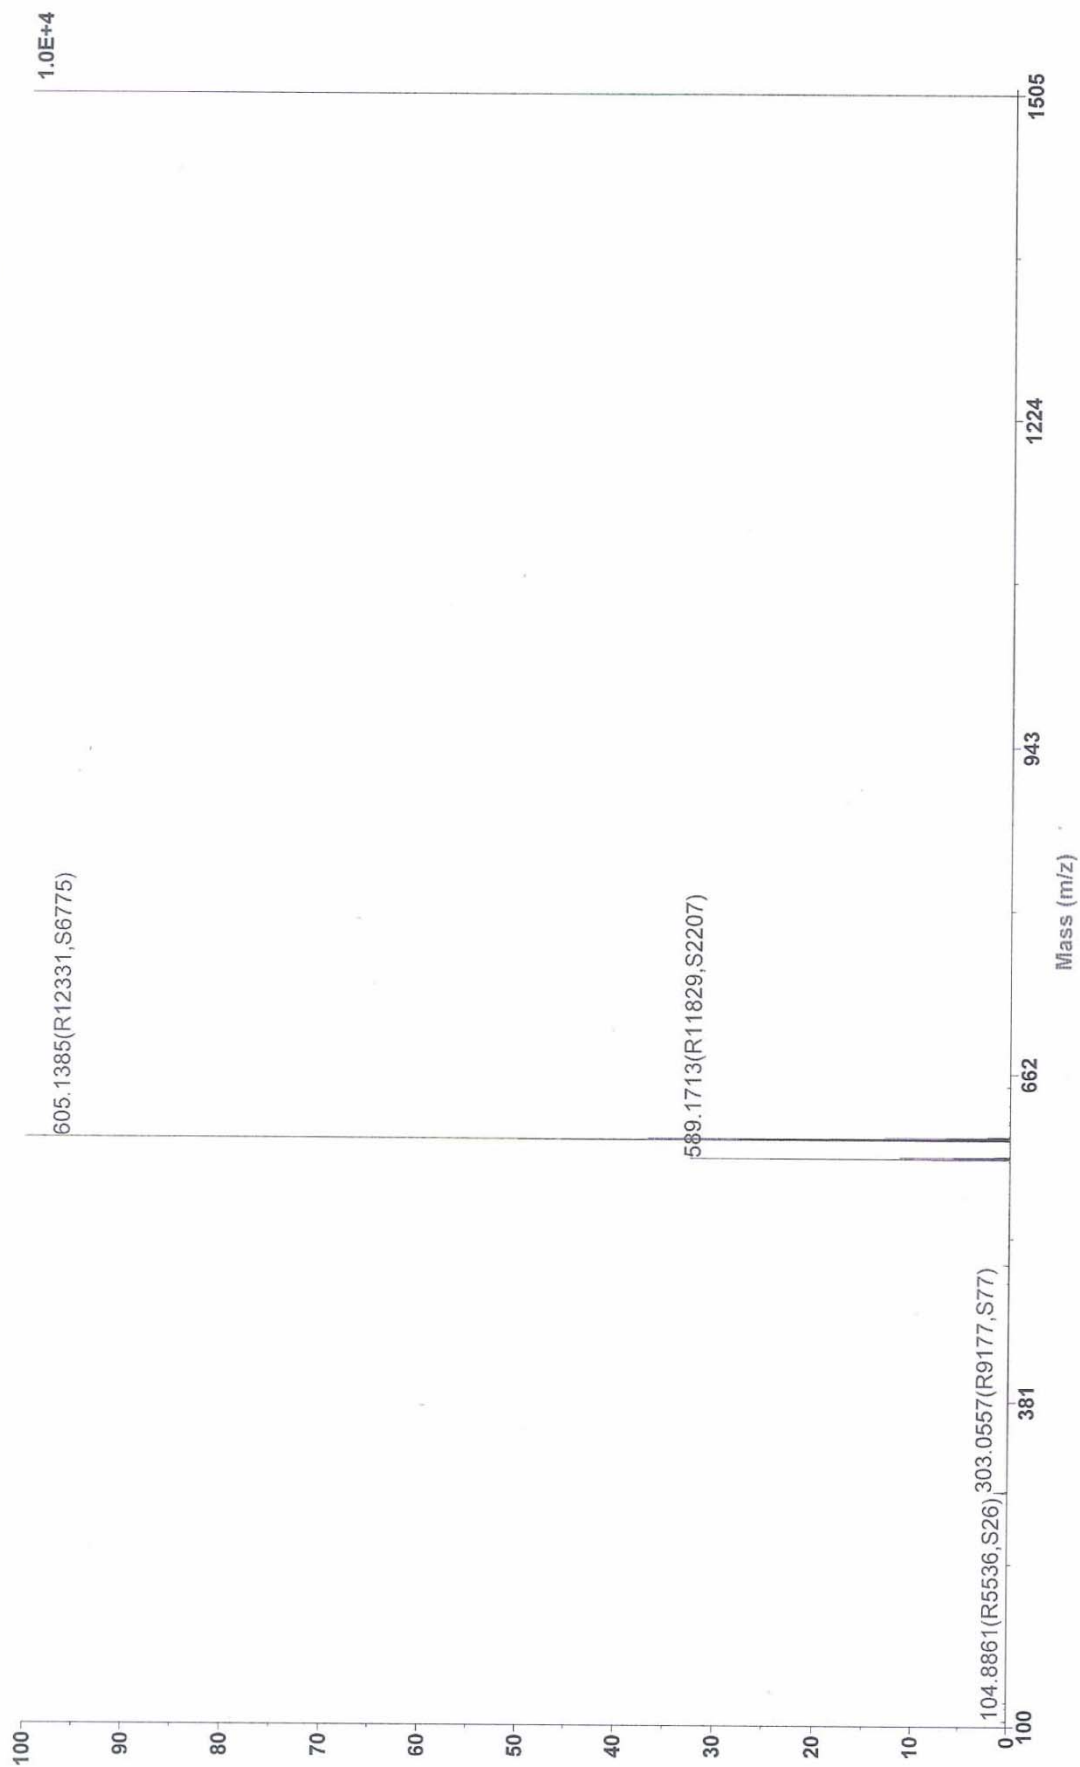

S44

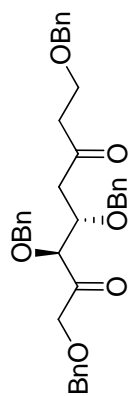

15

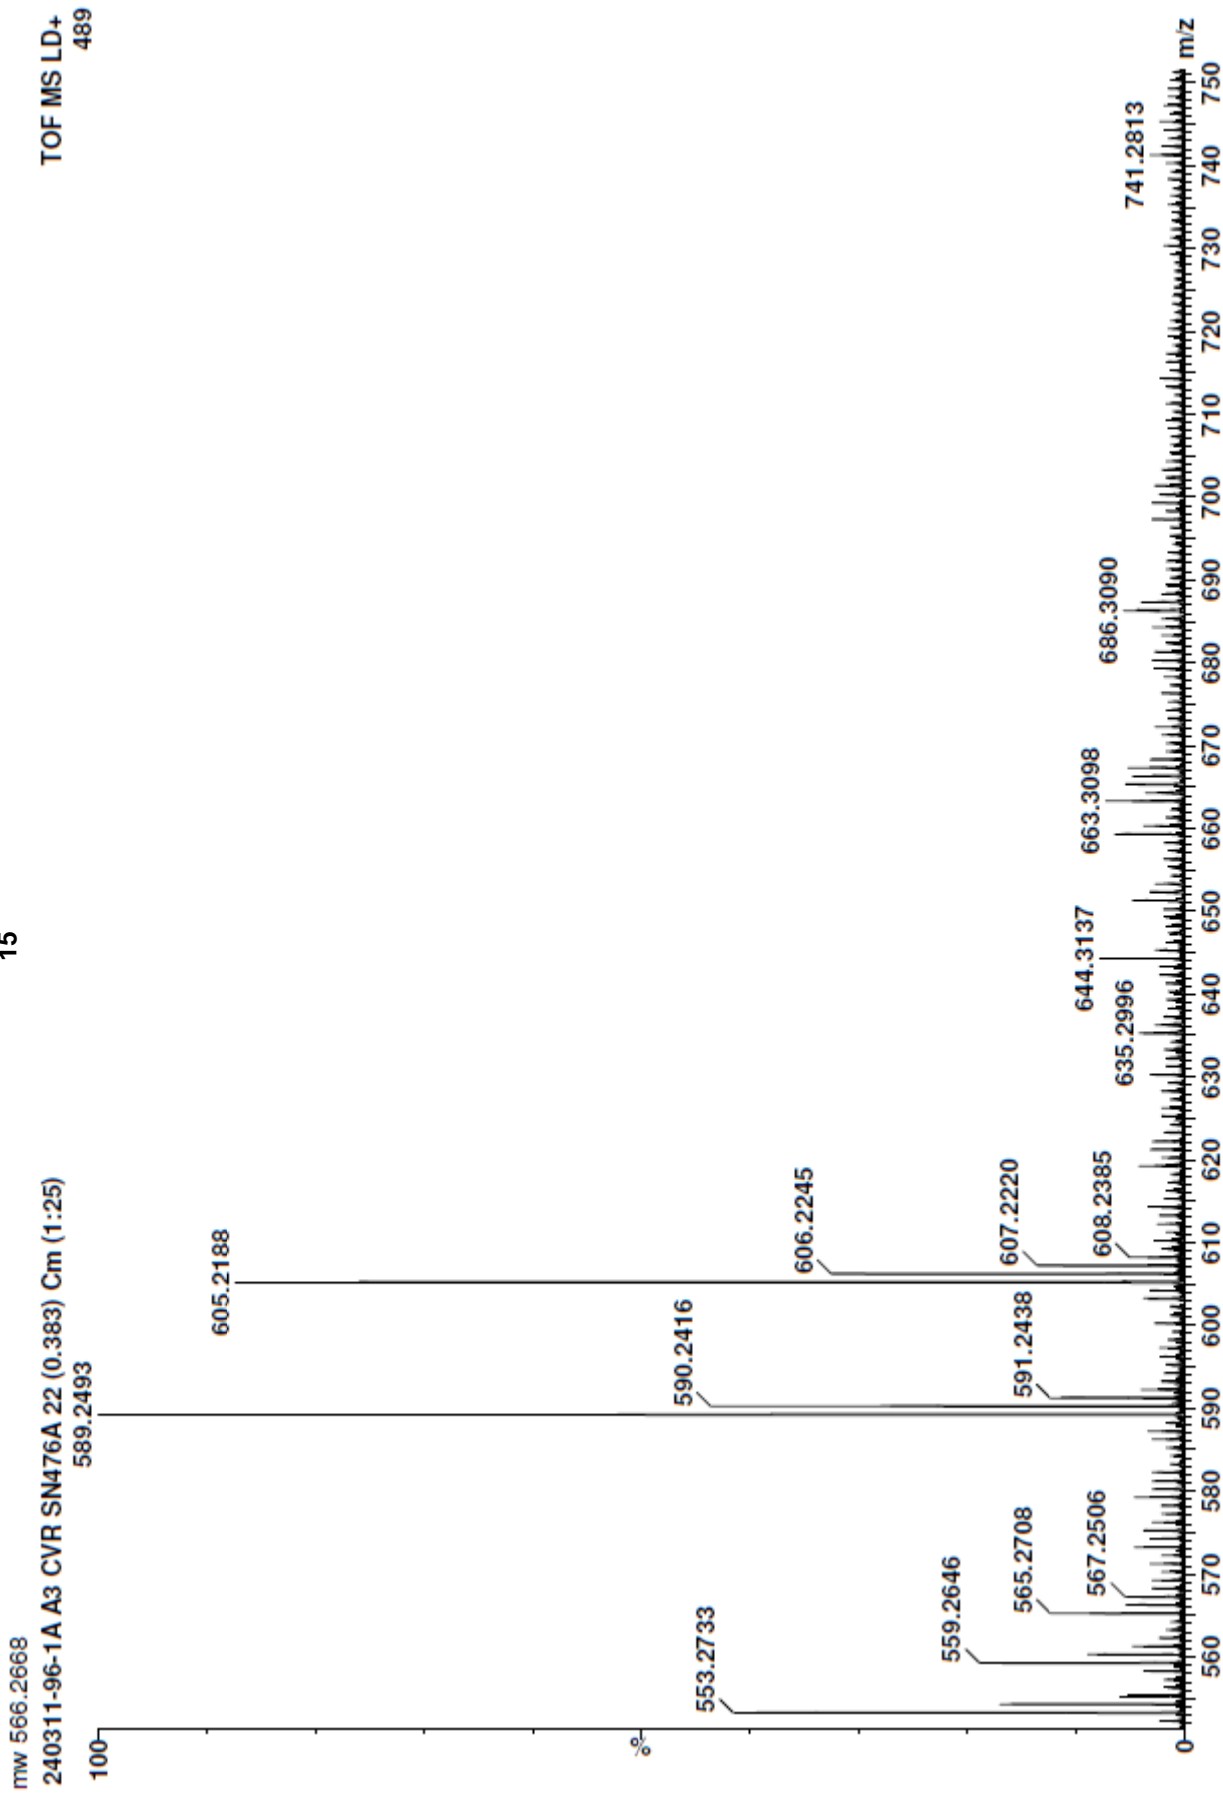

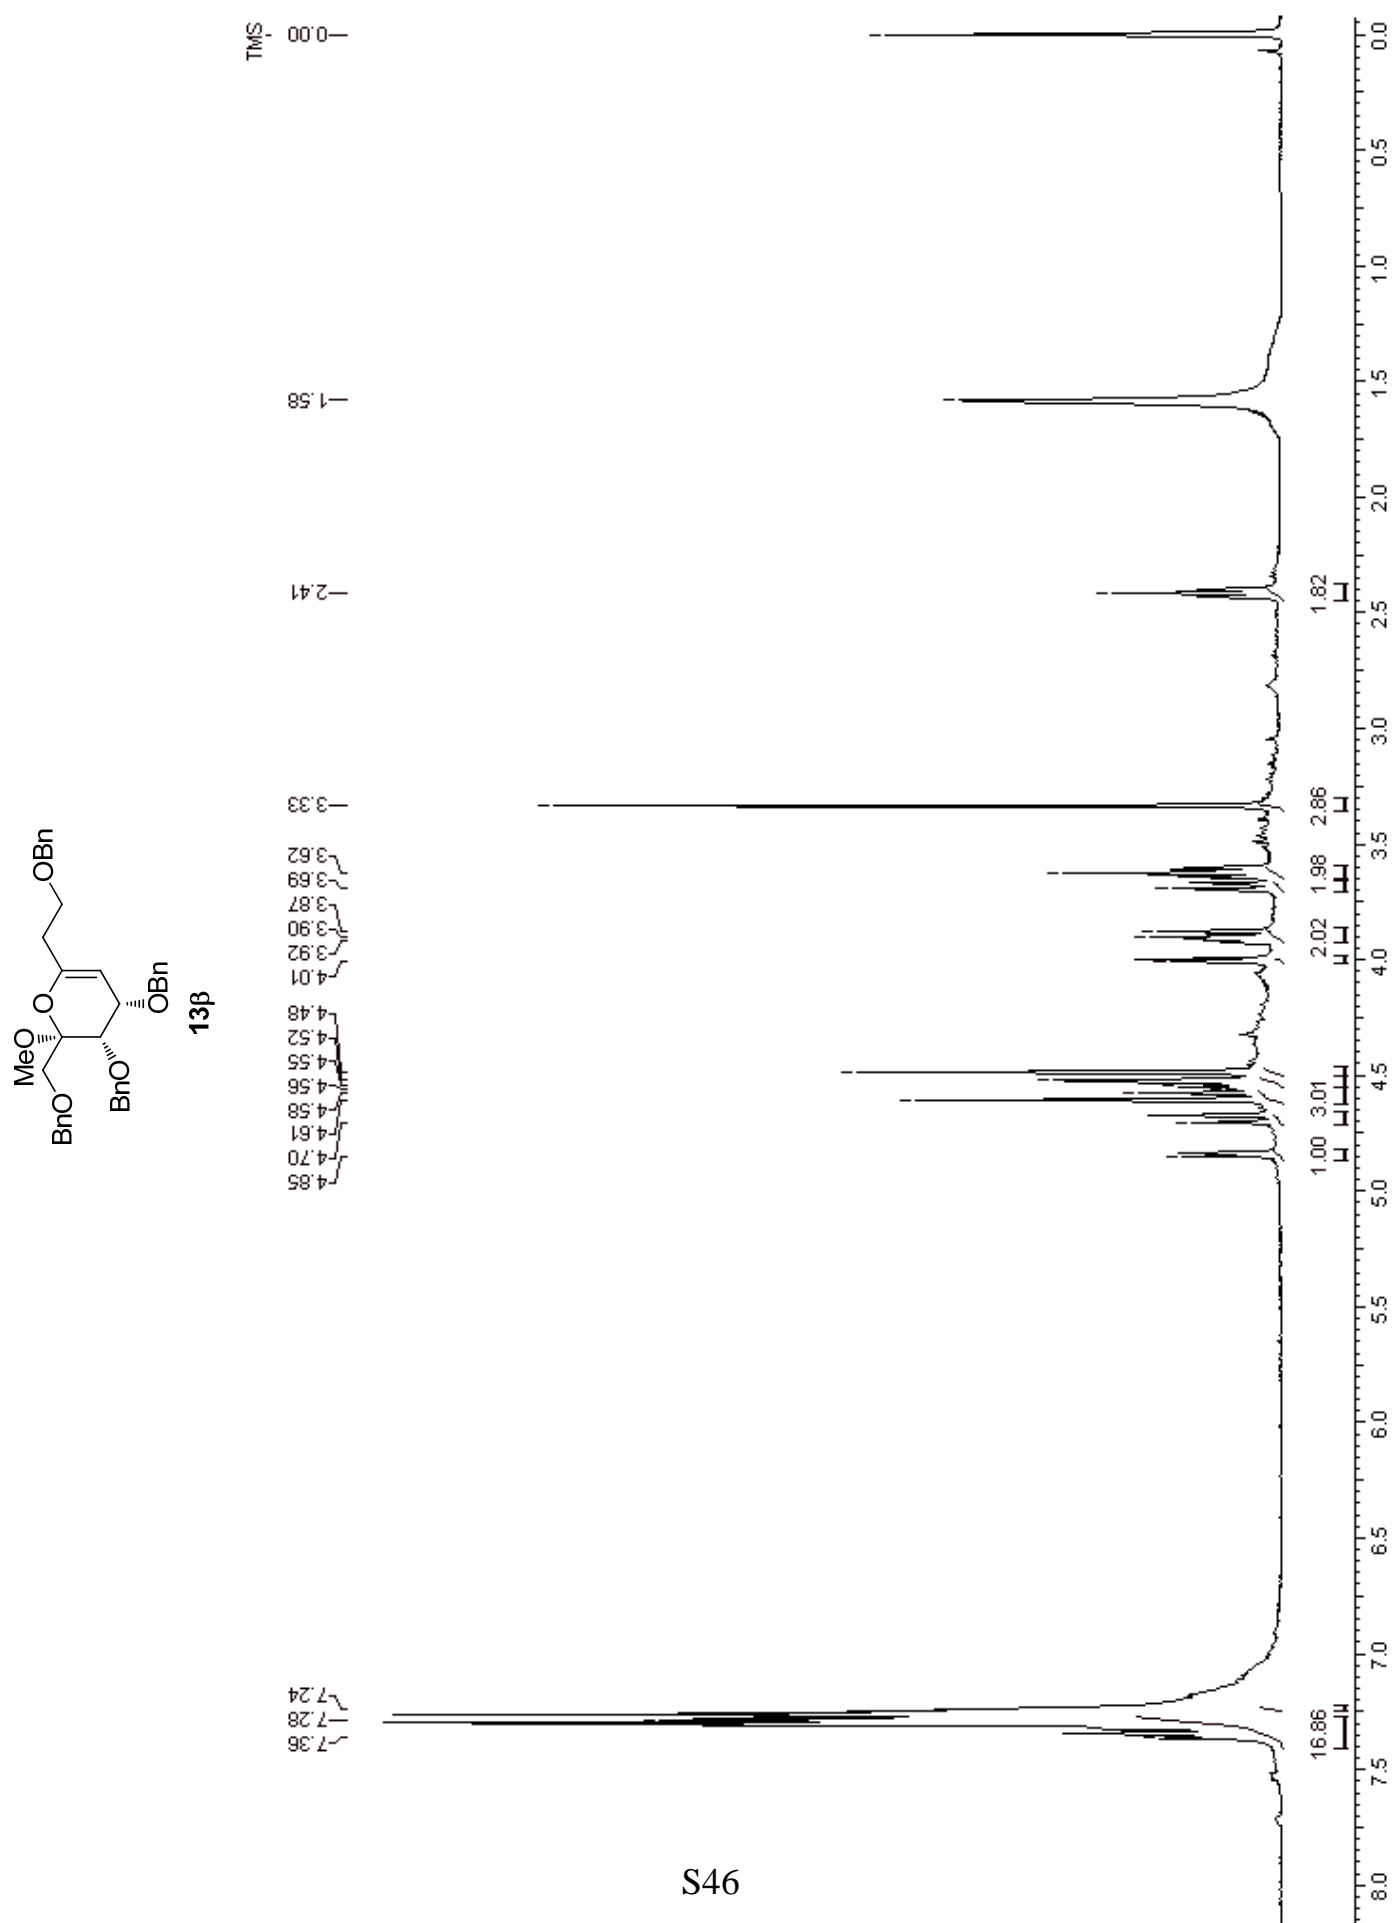

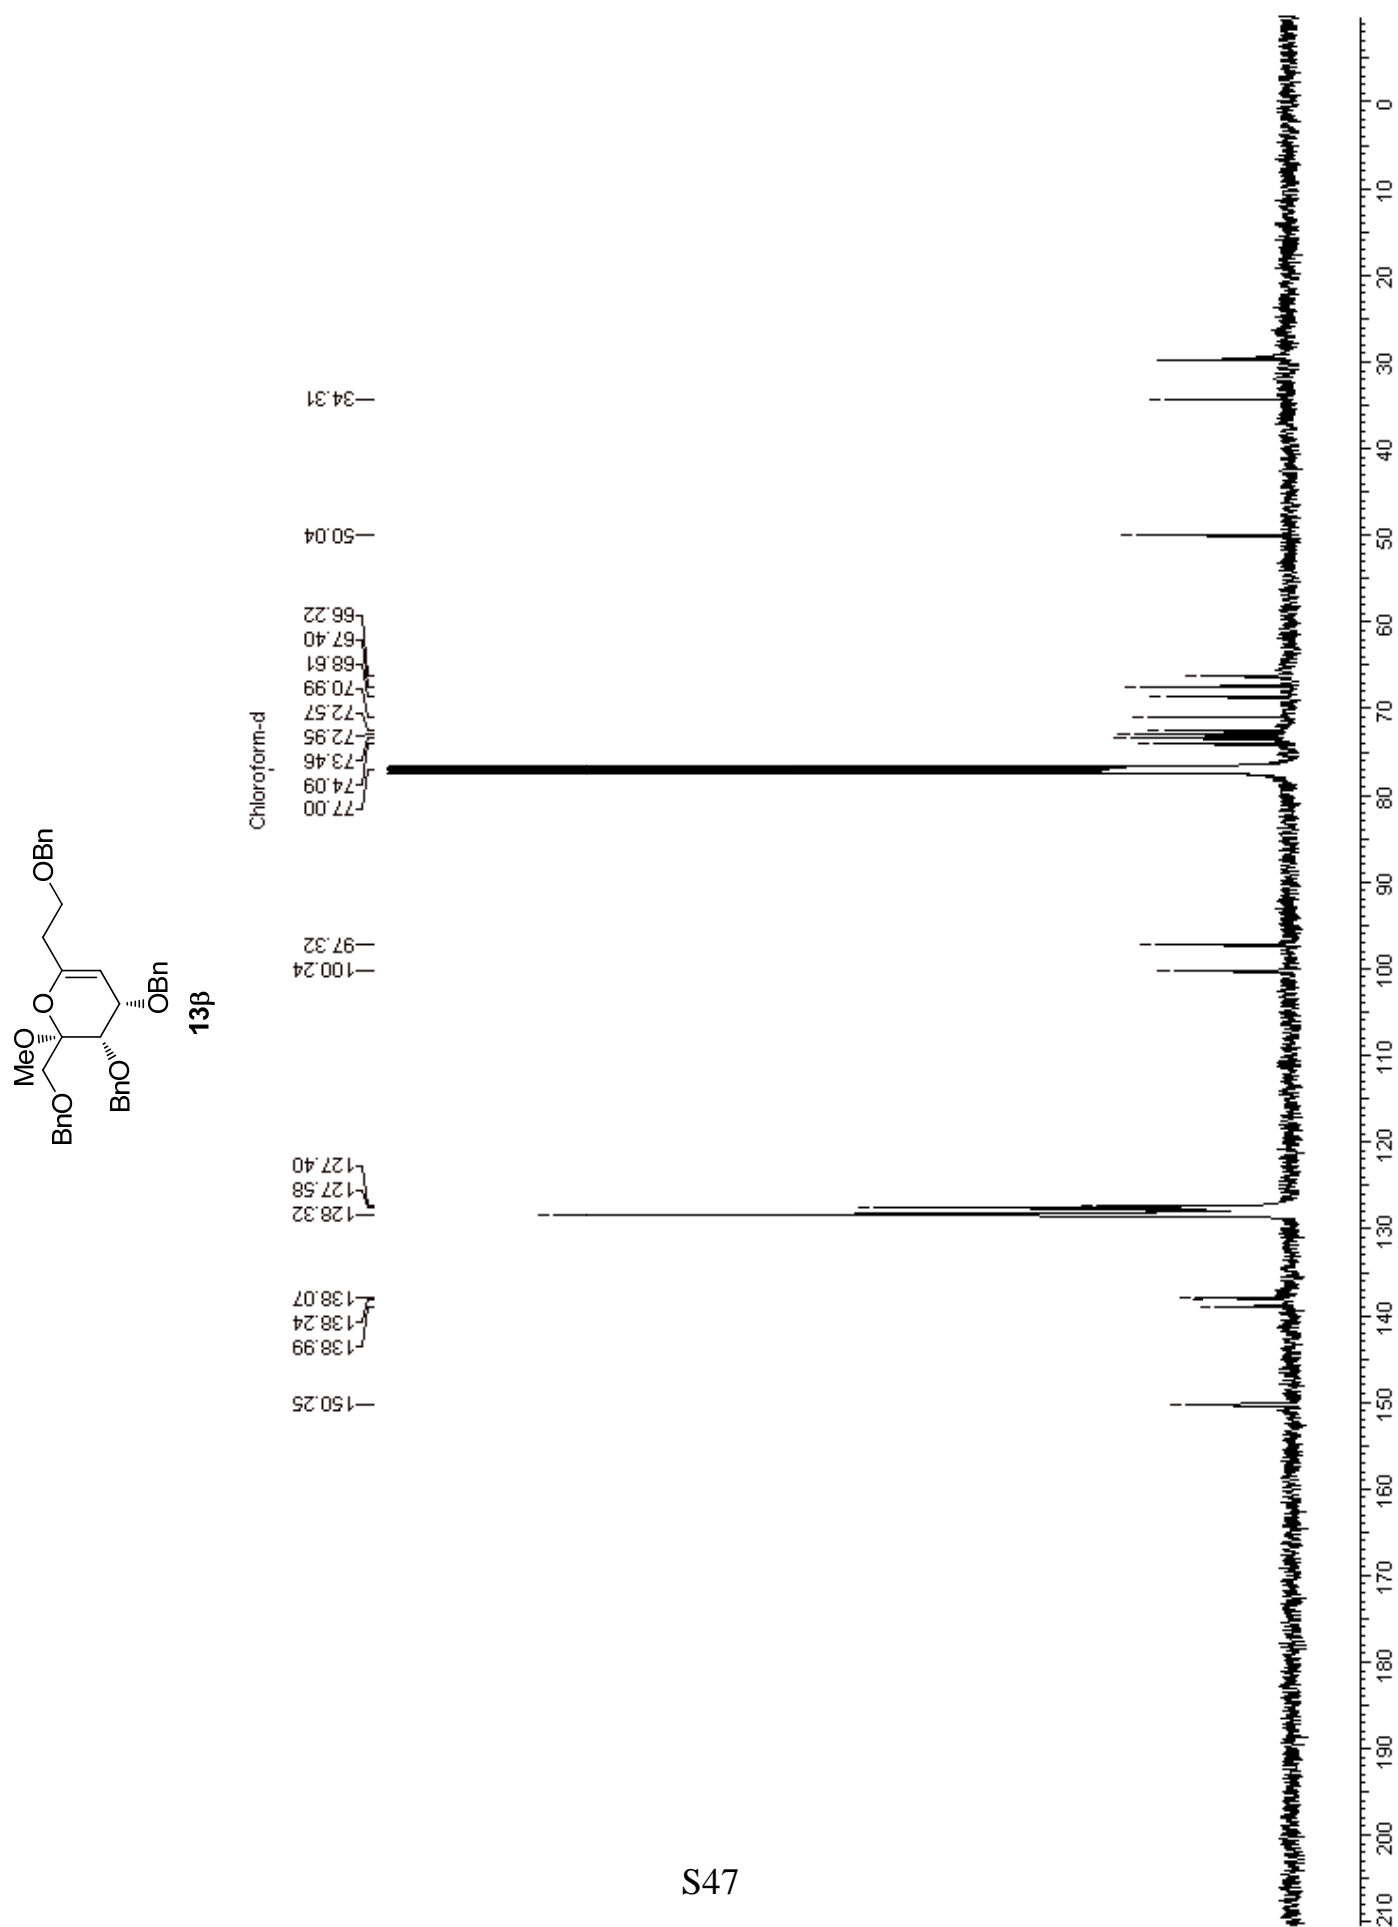

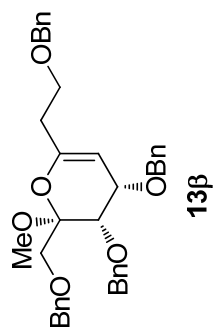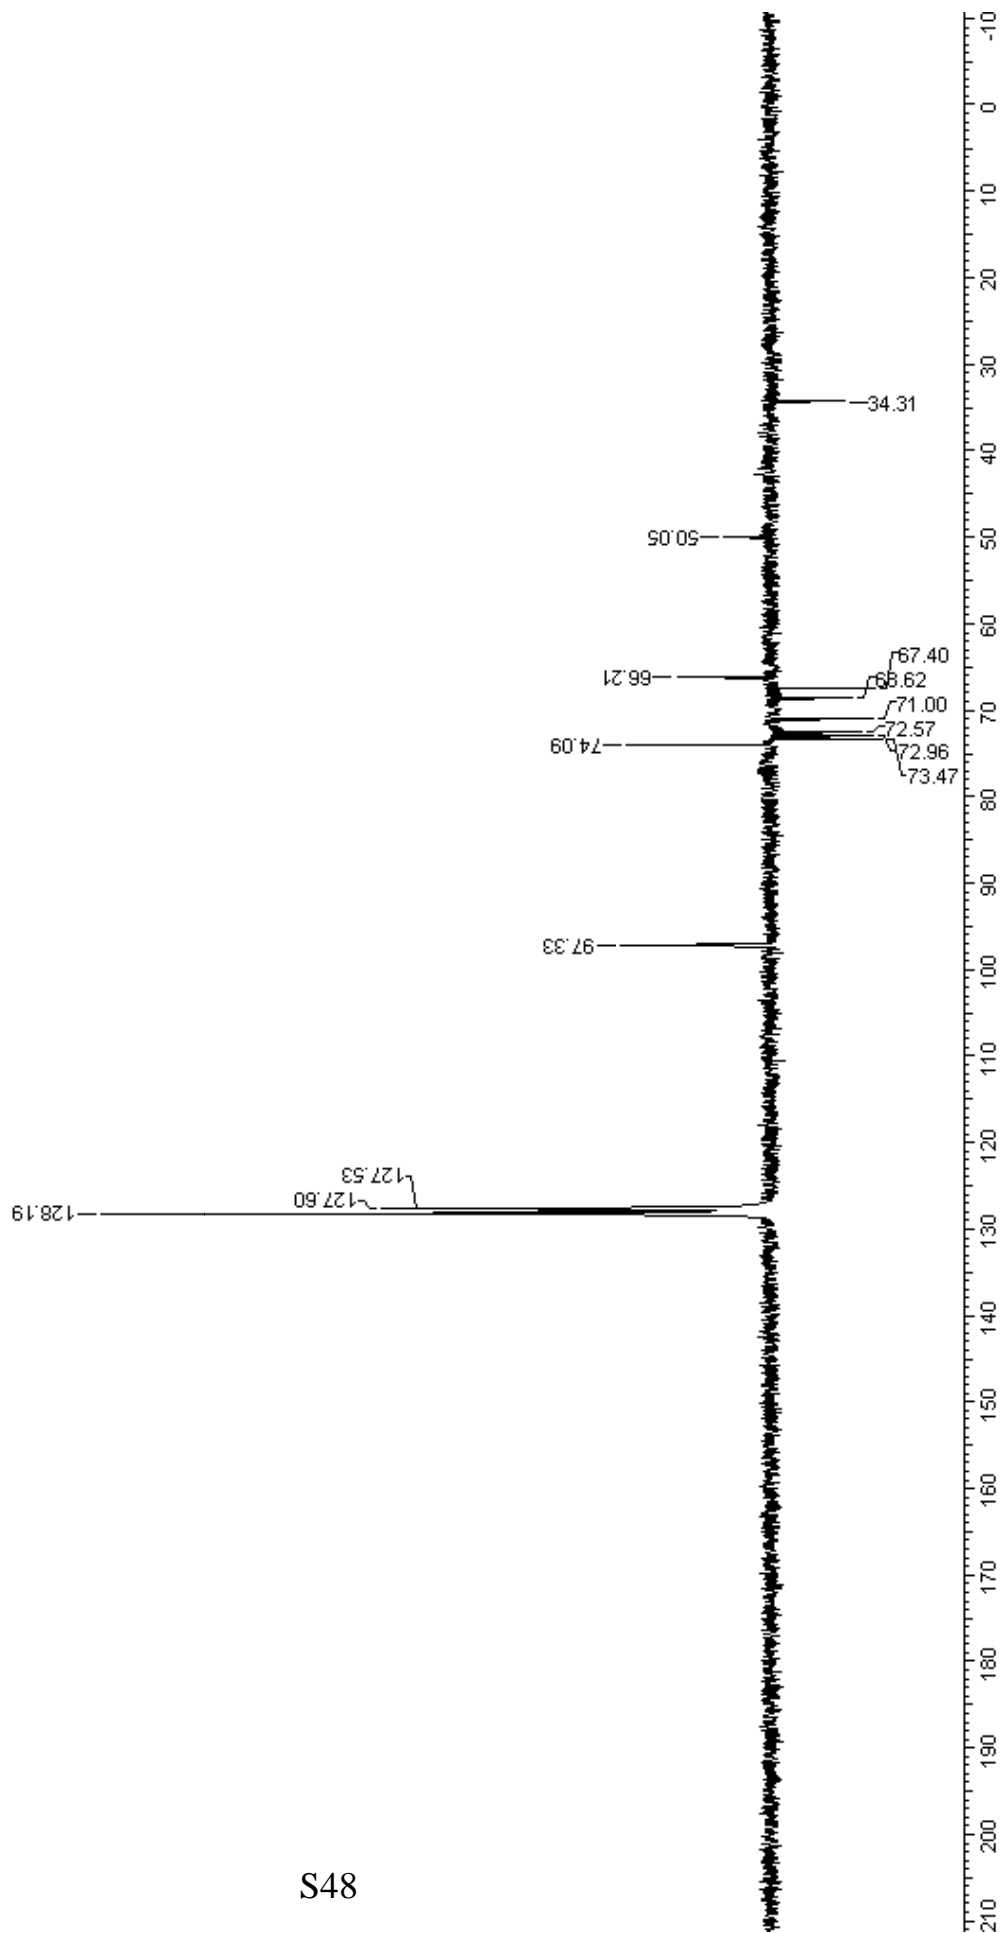



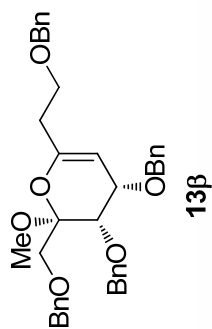

**13β**

SN\_476(B) / 12 β

\*LCKSMS - 0 STAR PULSAR

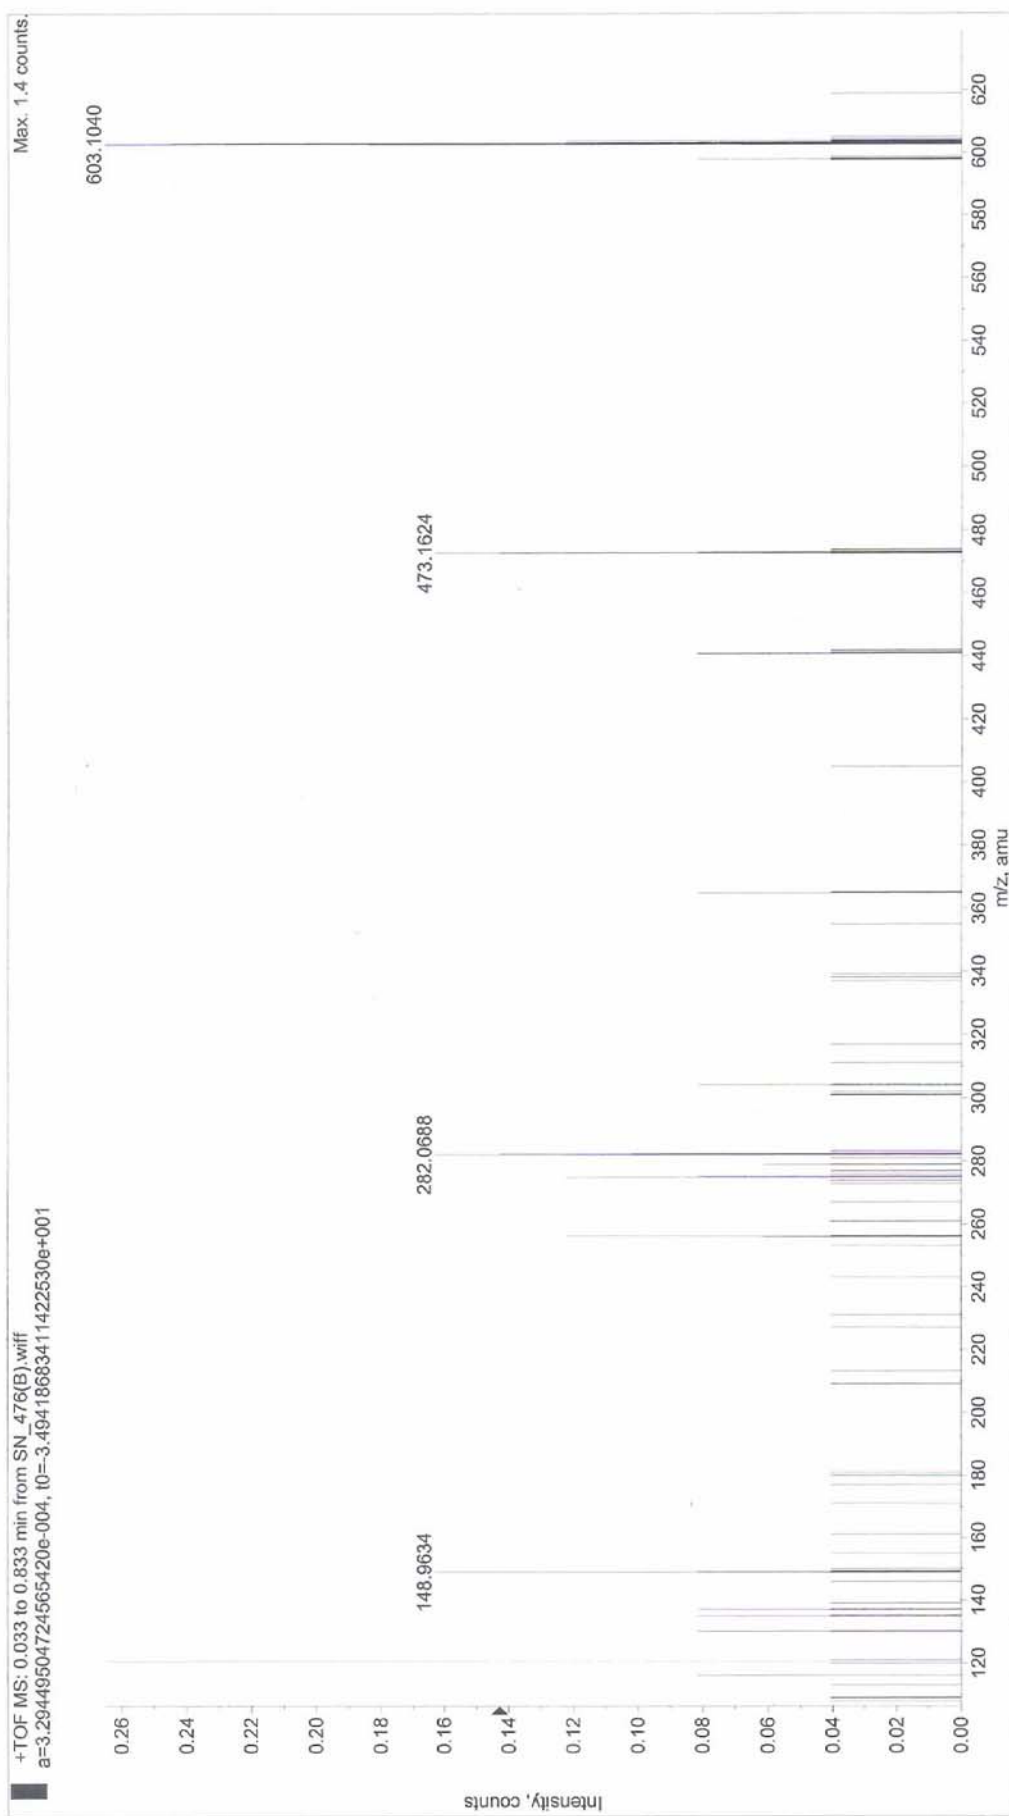

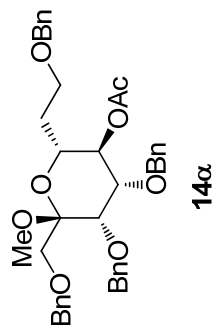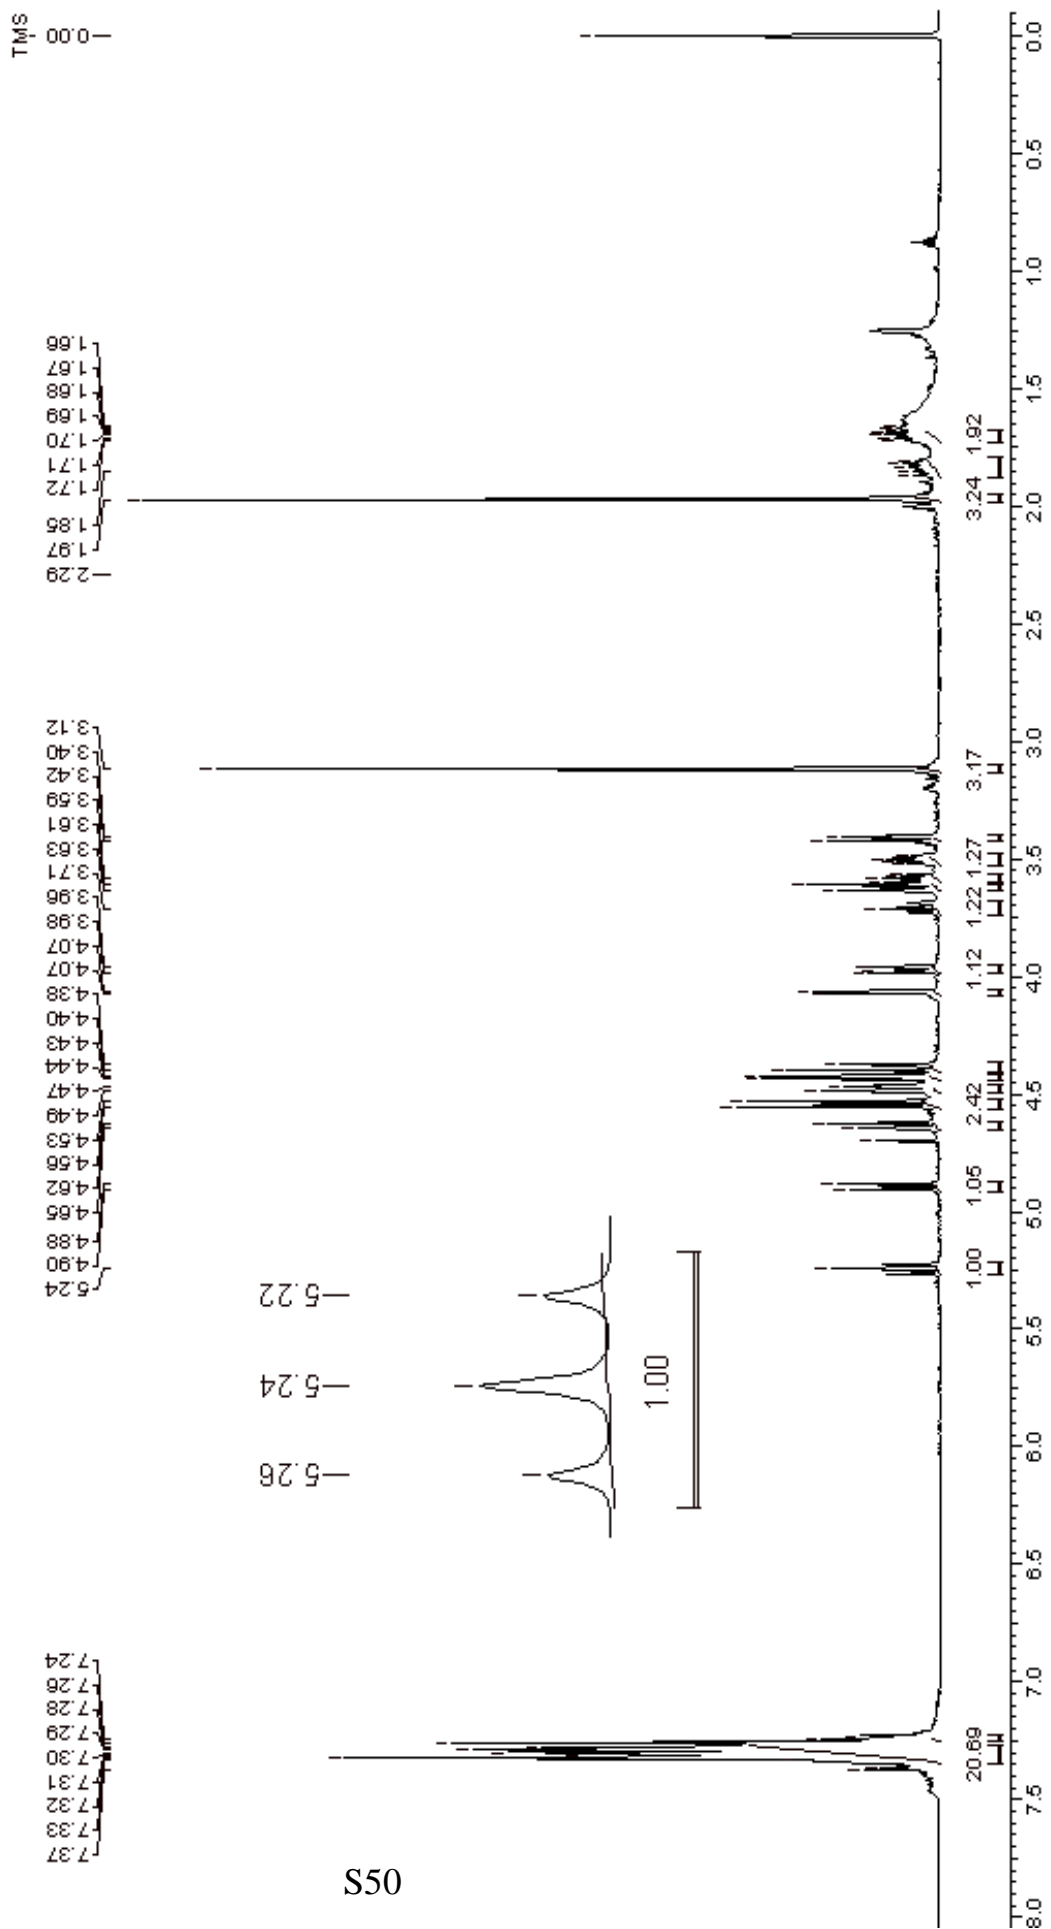

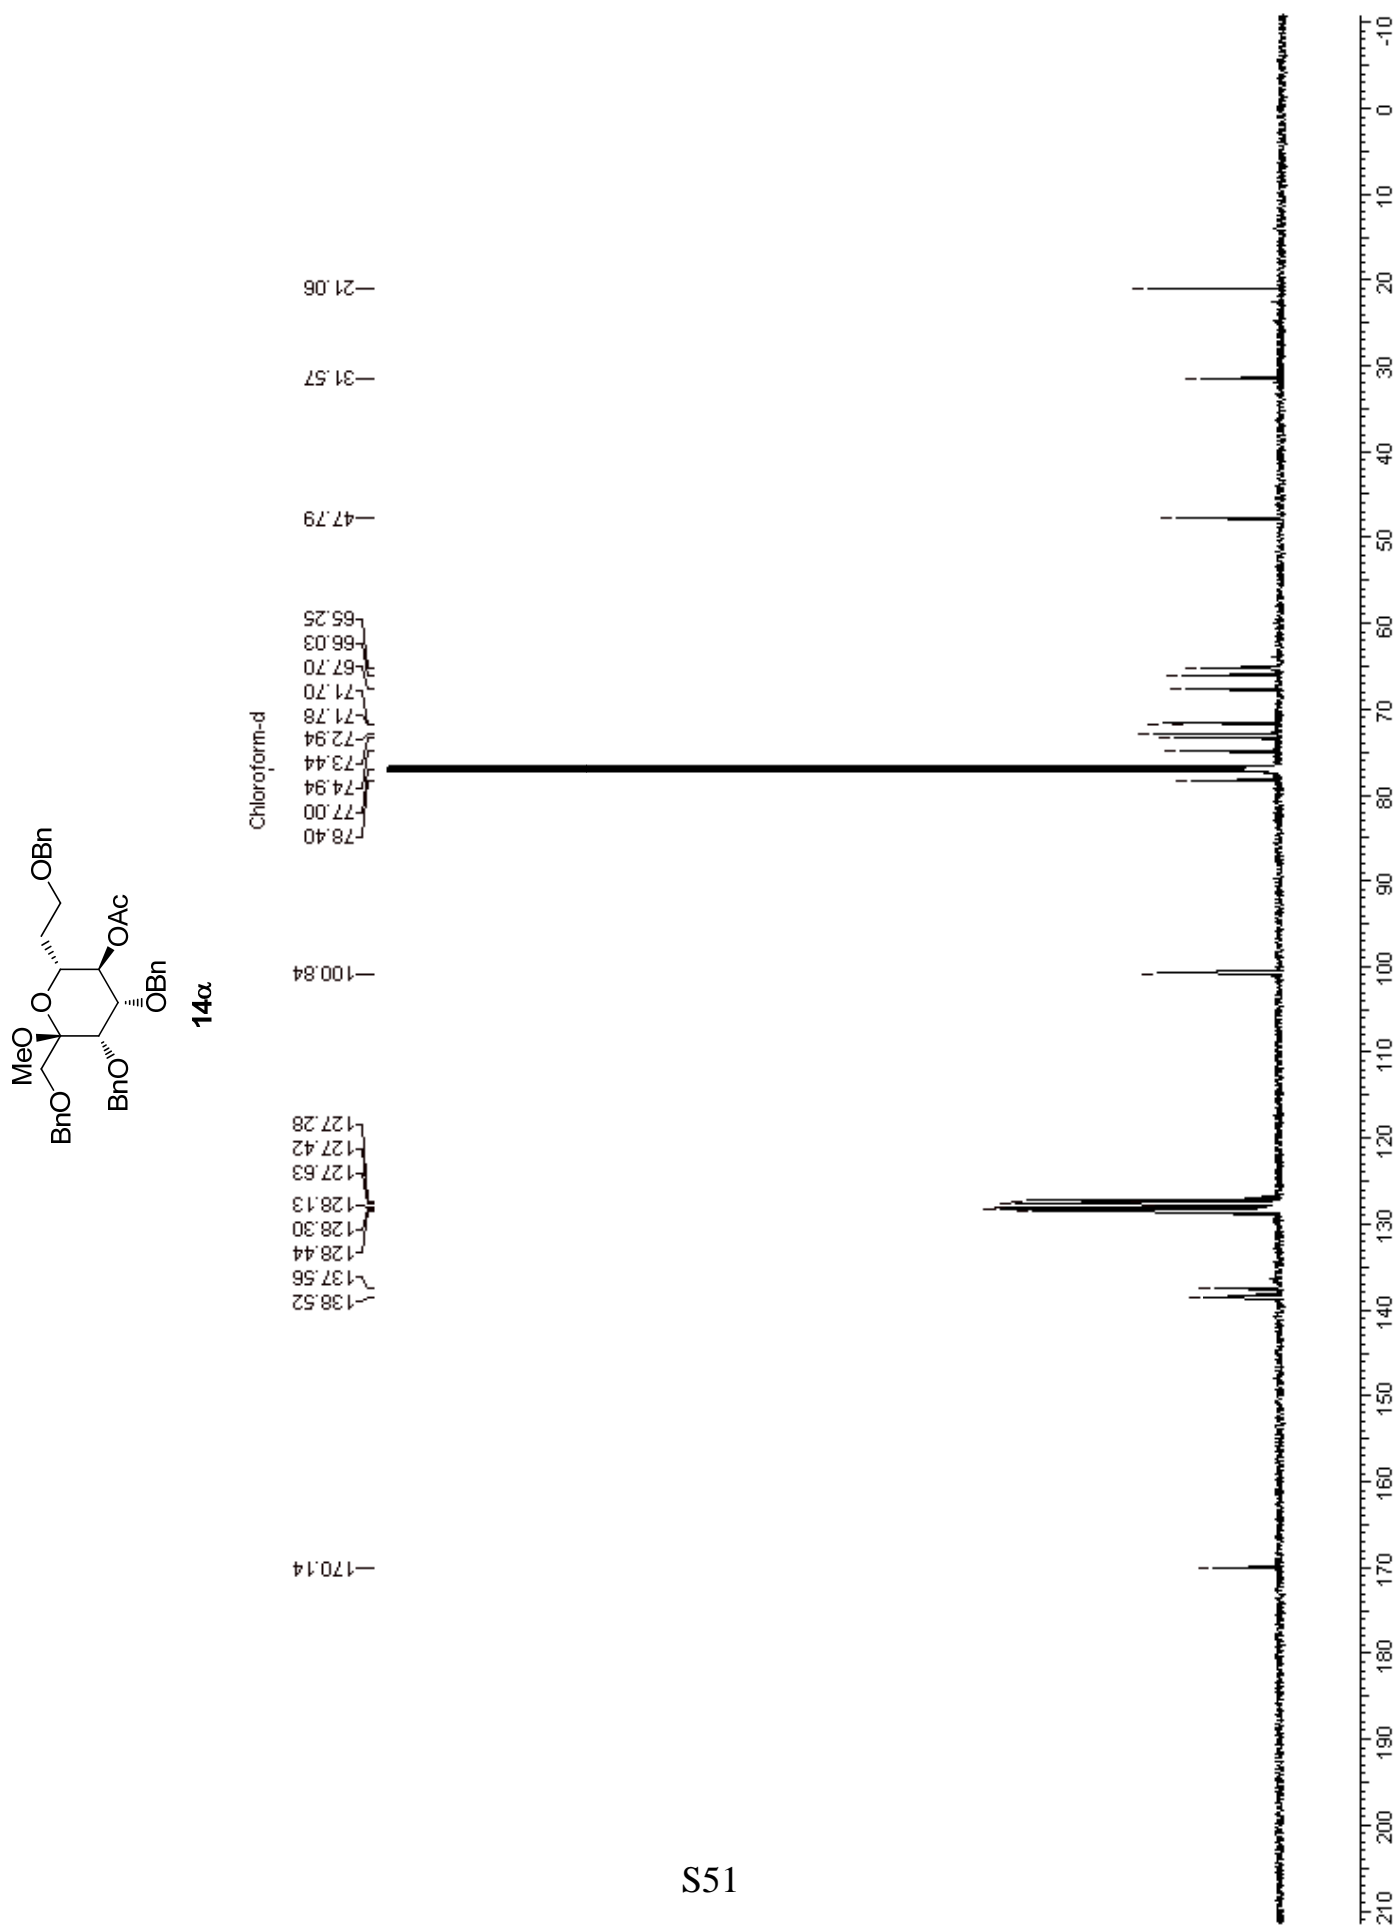

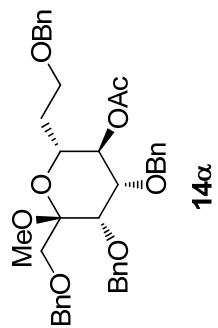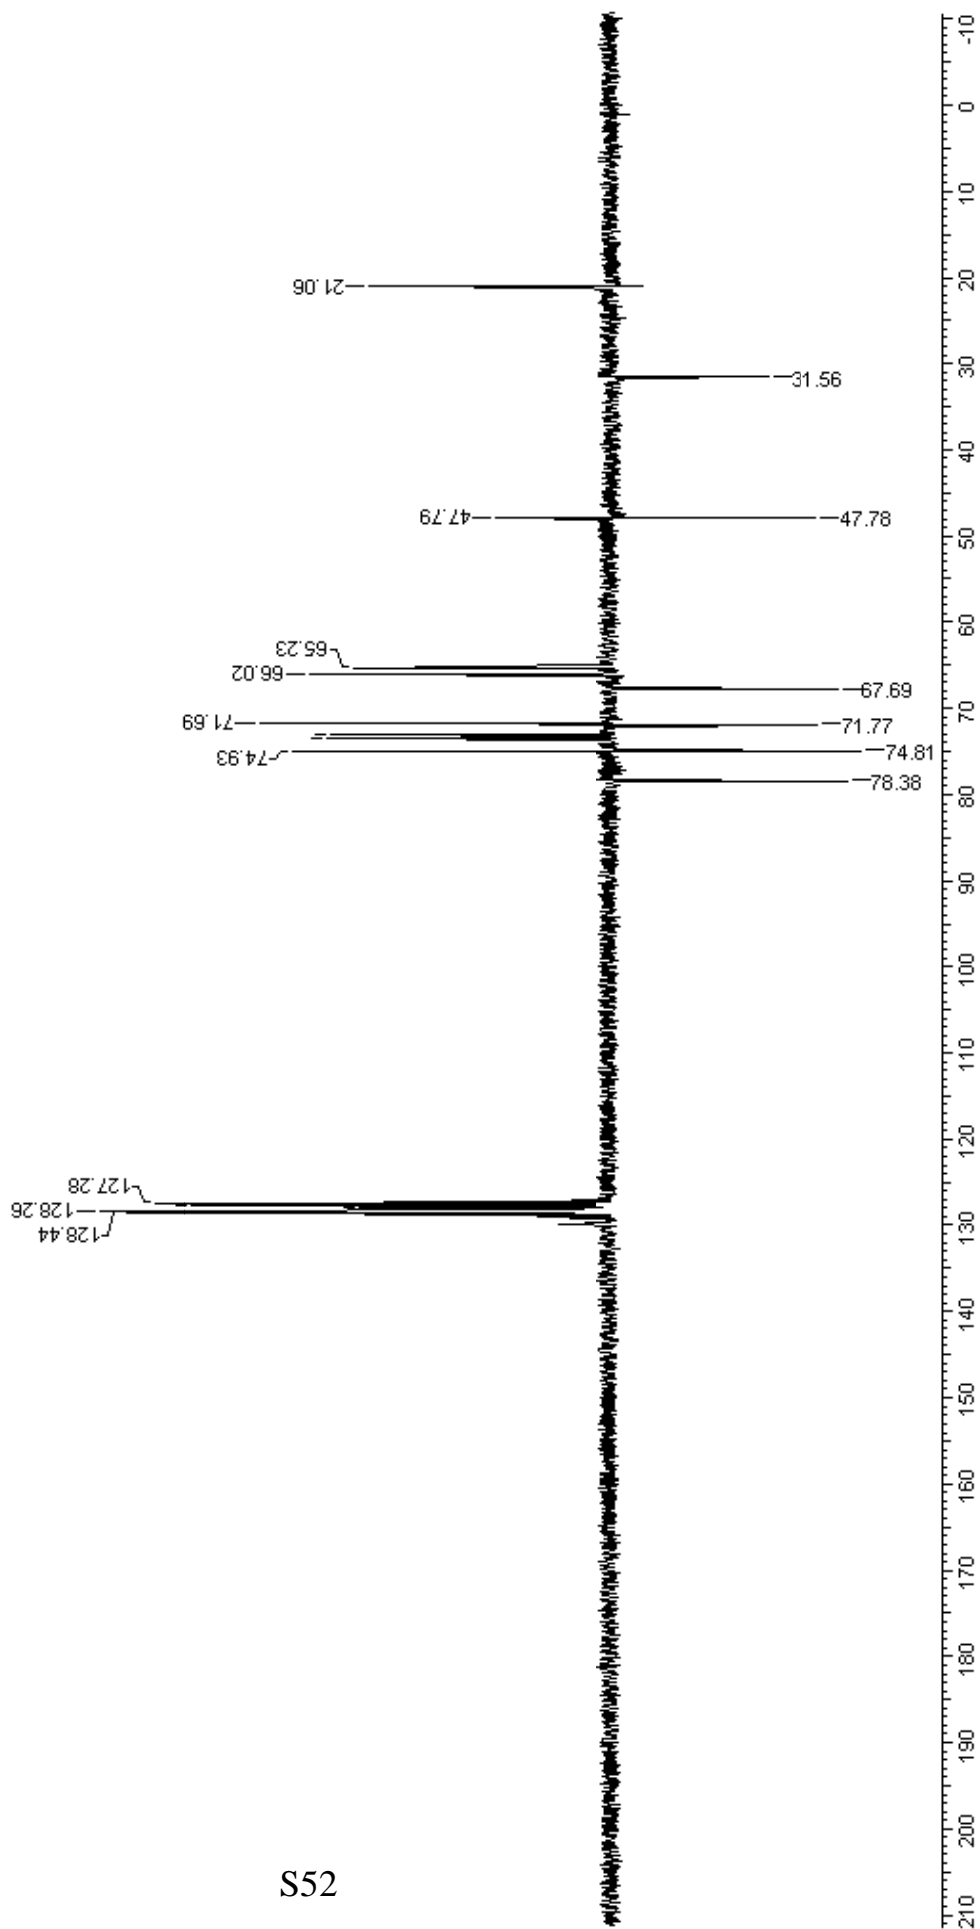

# COSY-14 $\alpha$

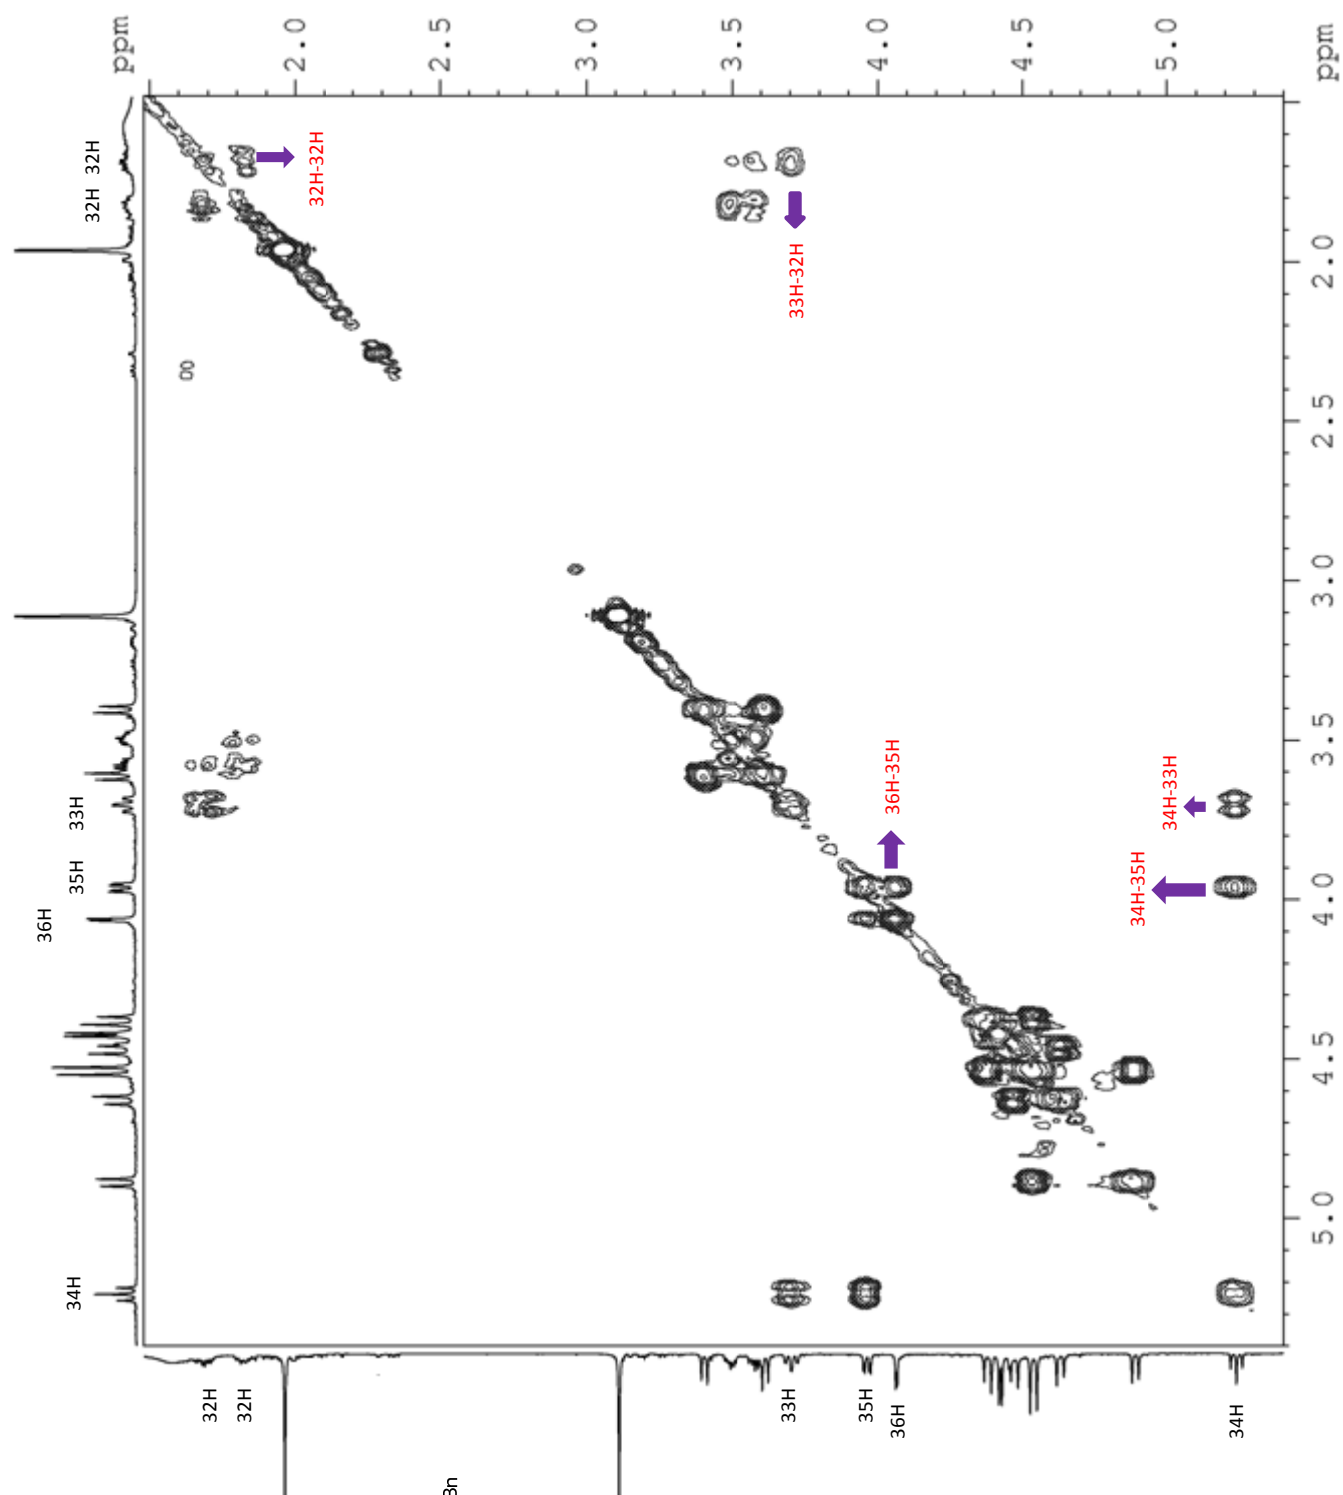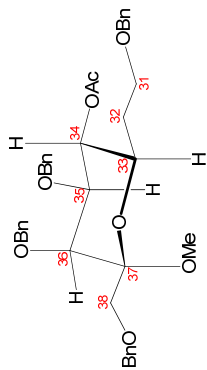

# NOESY-14 $\alpha$

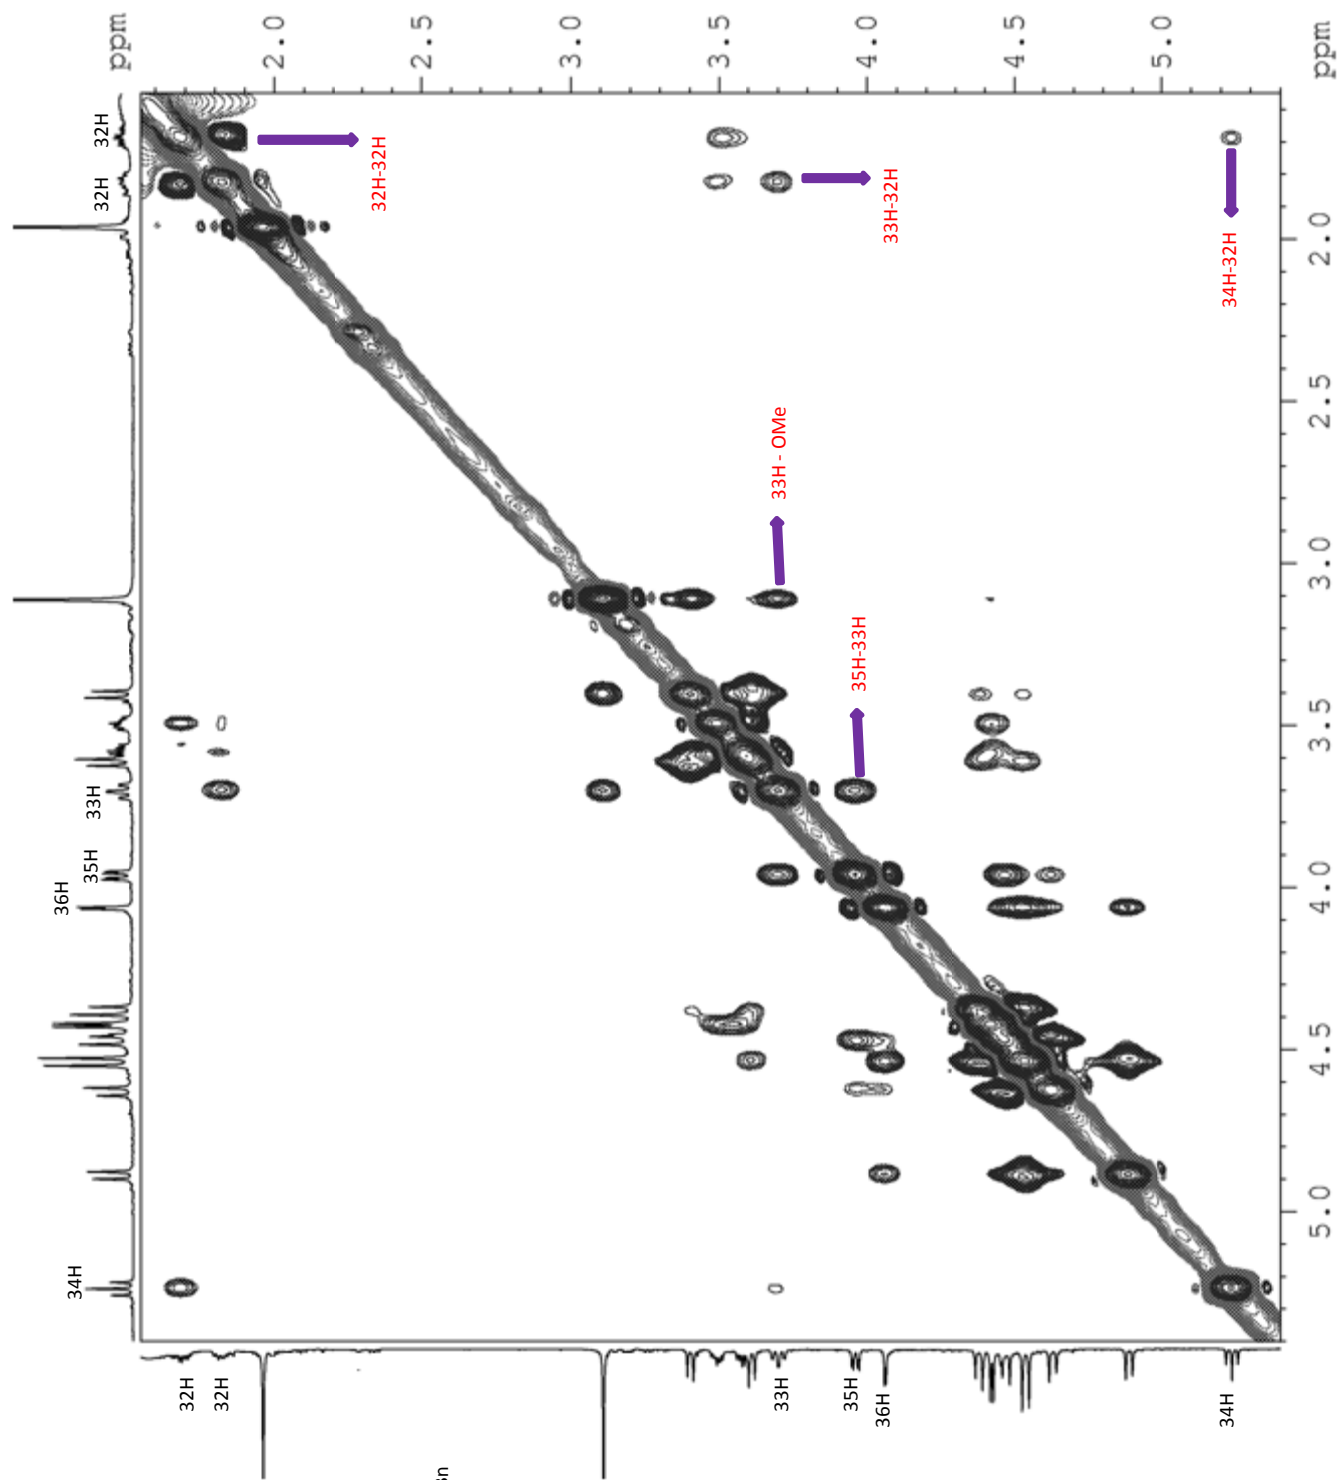

NOESY-14 $\alpha$  (Expansion)

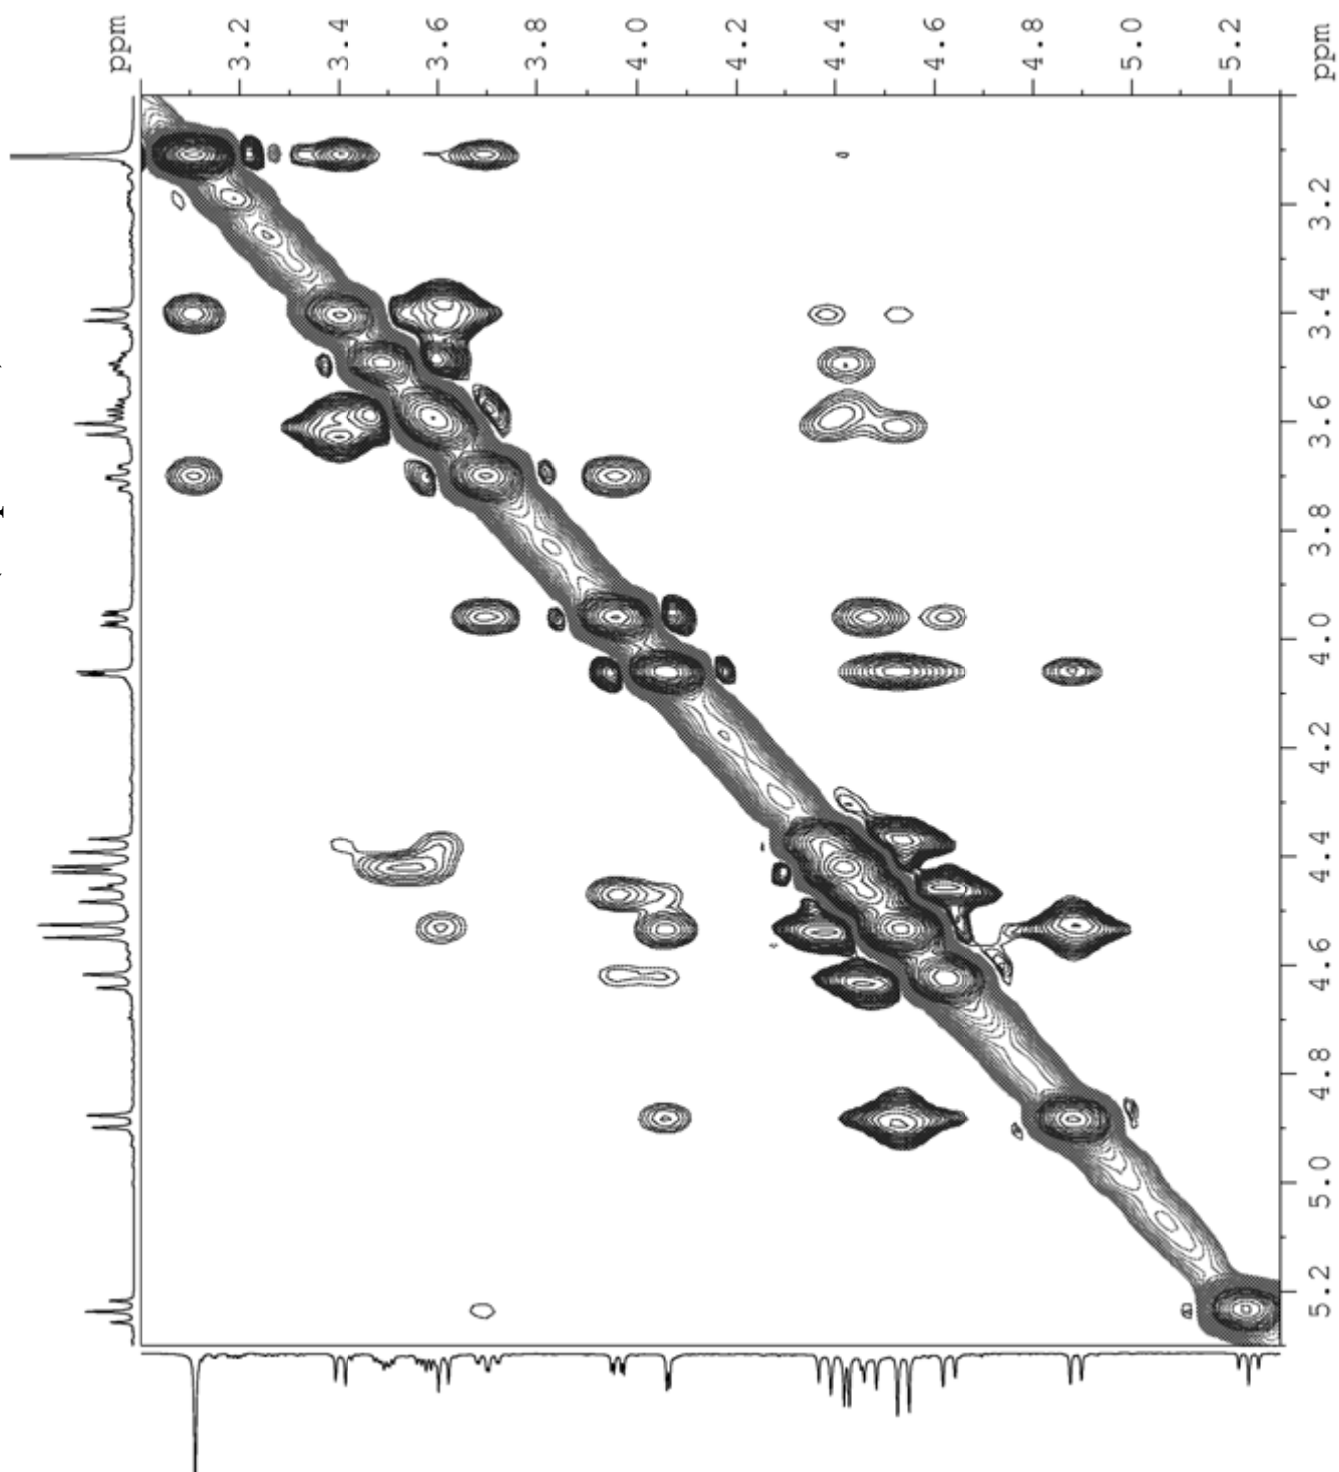

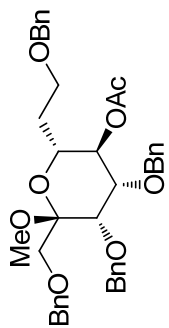

**14 $\alpha$**

**Spectrum Report**

*SN-494 (major) / 13d*

Final - Shots 750 - IISER; Run #90; Label O5

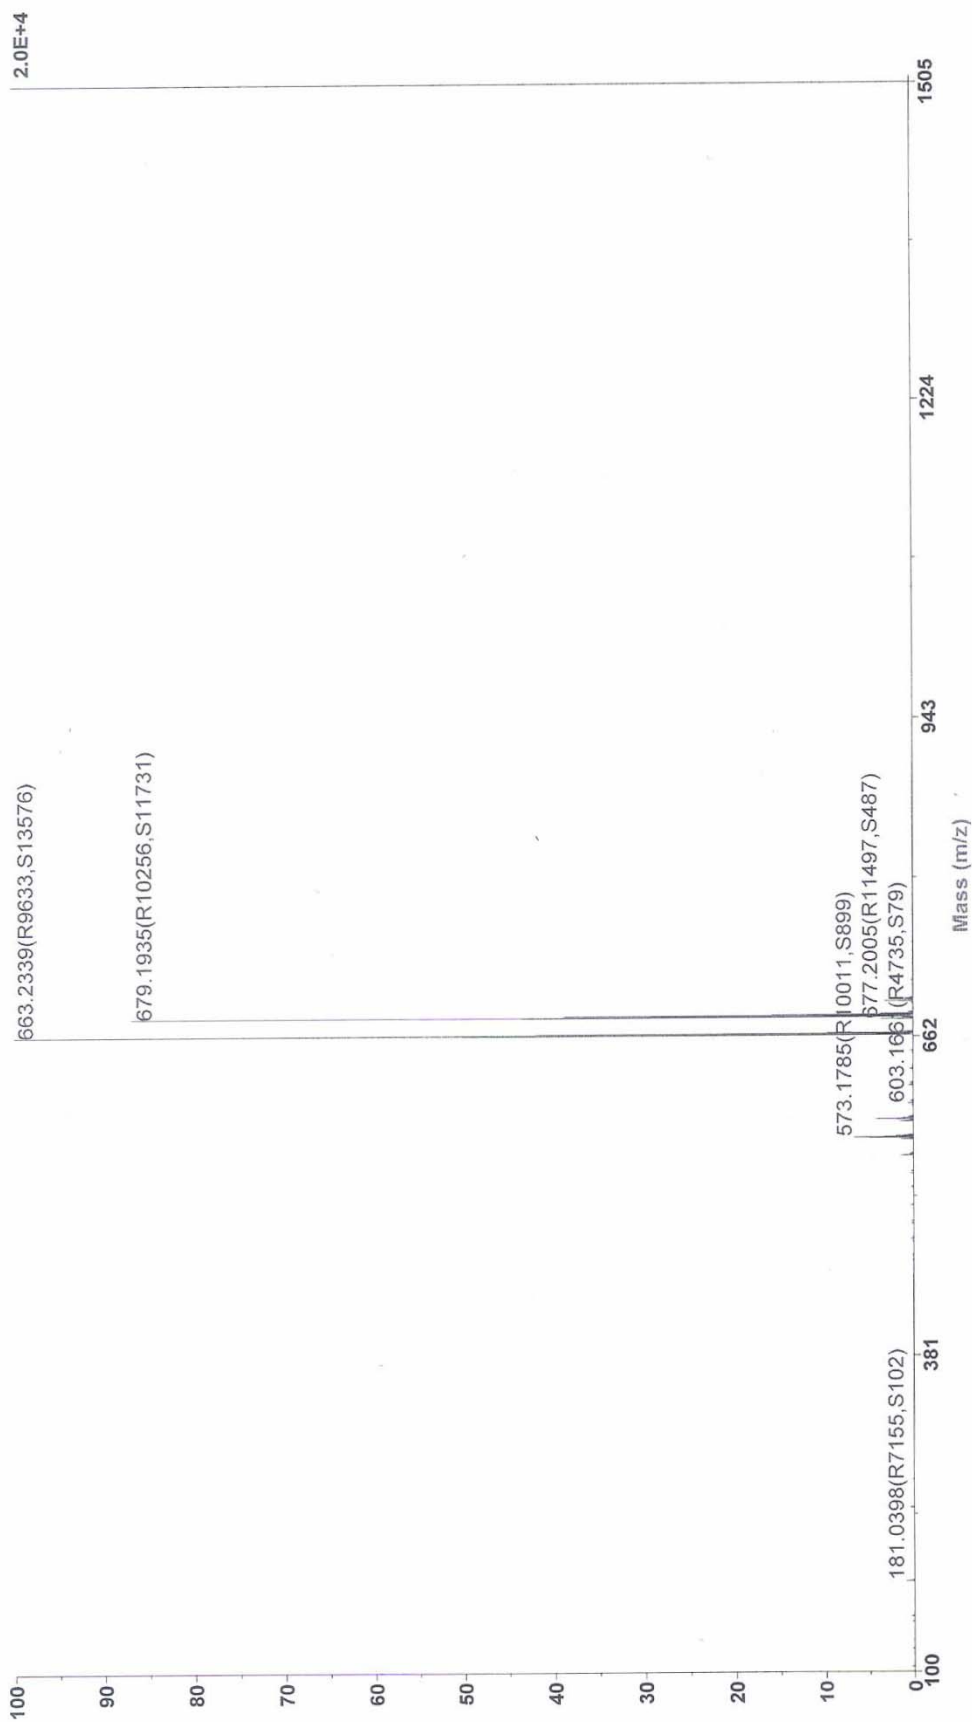



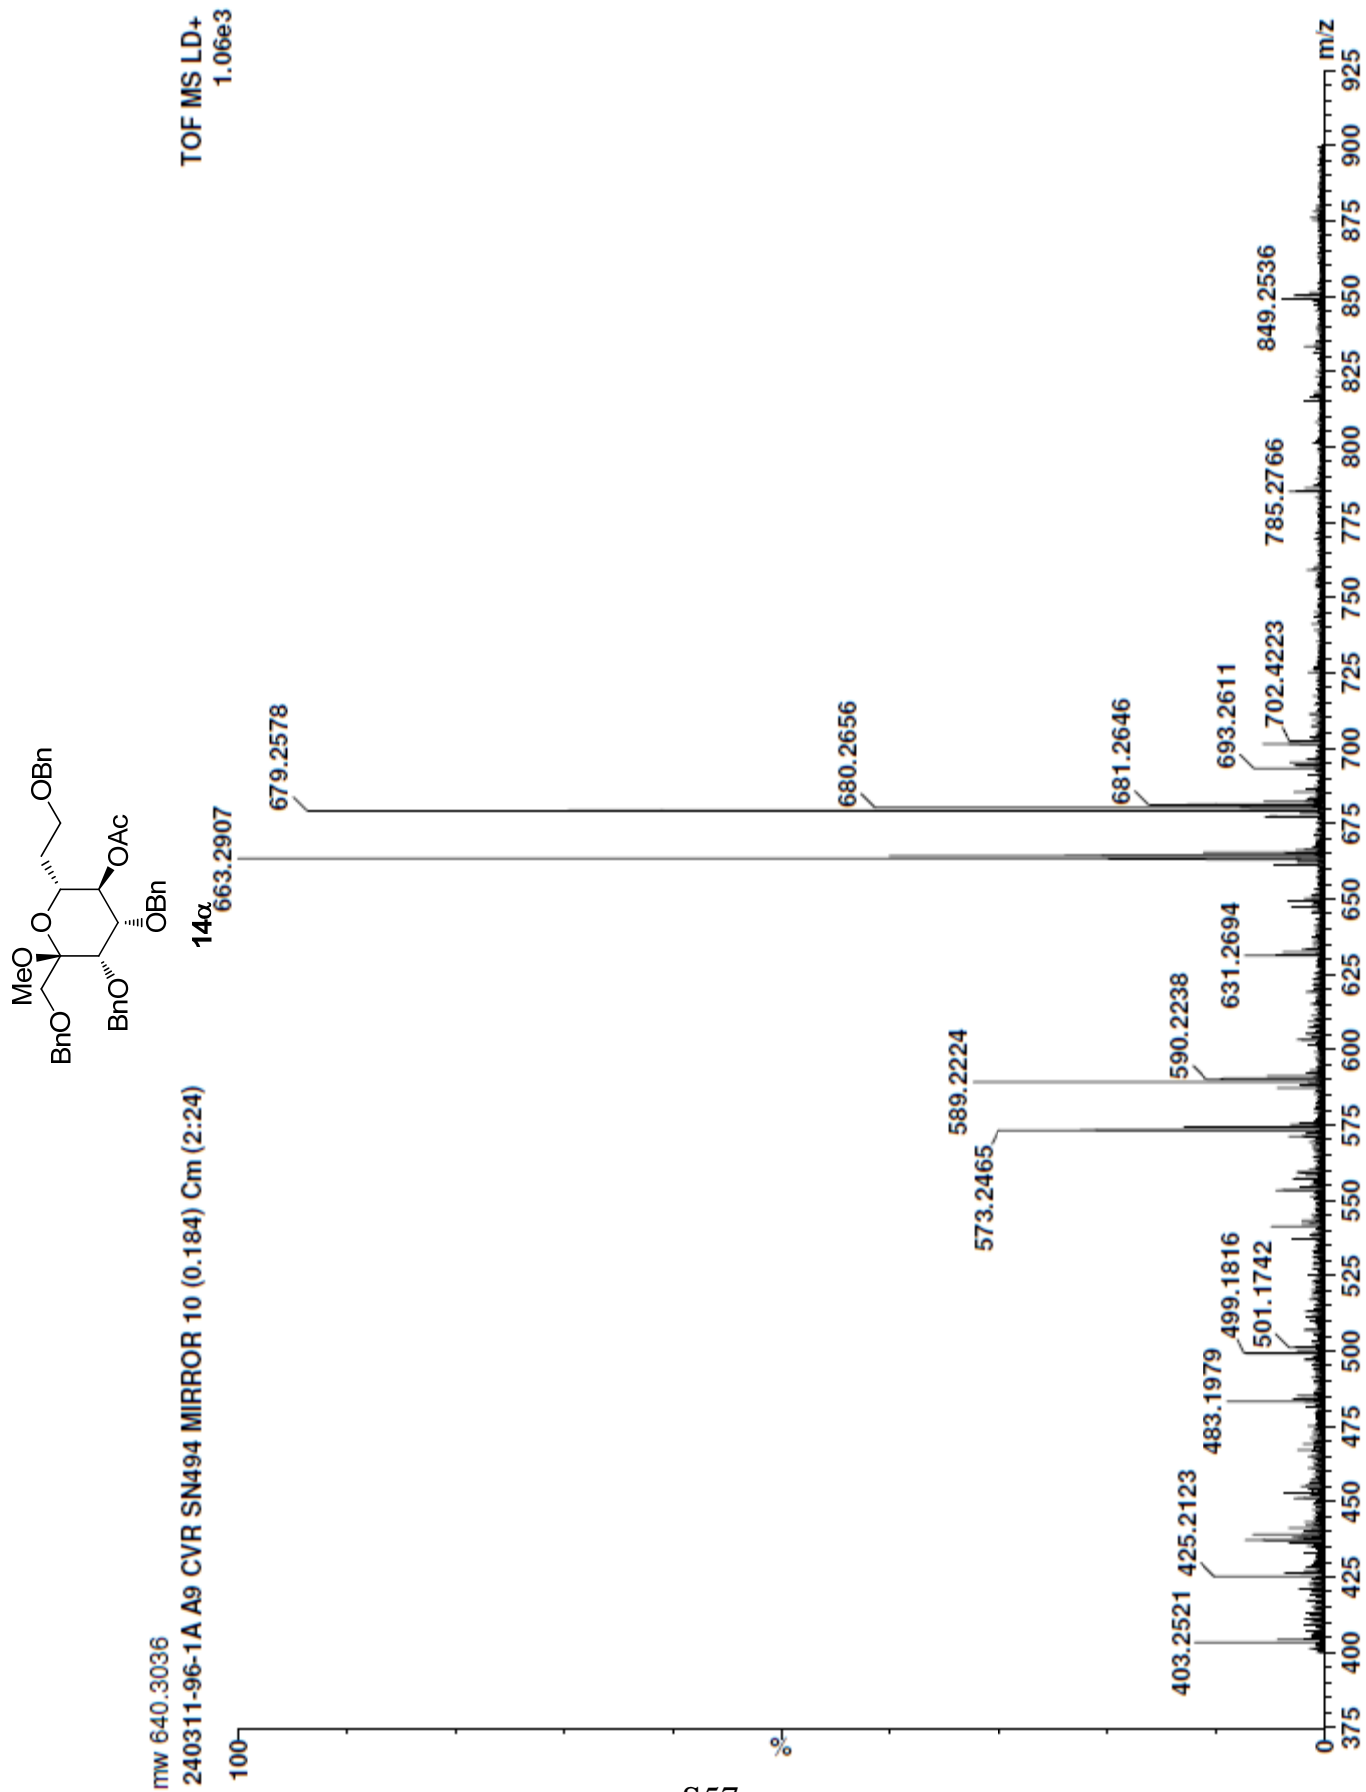

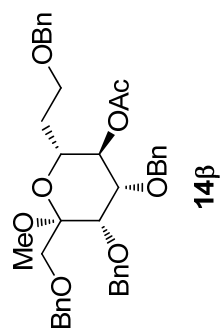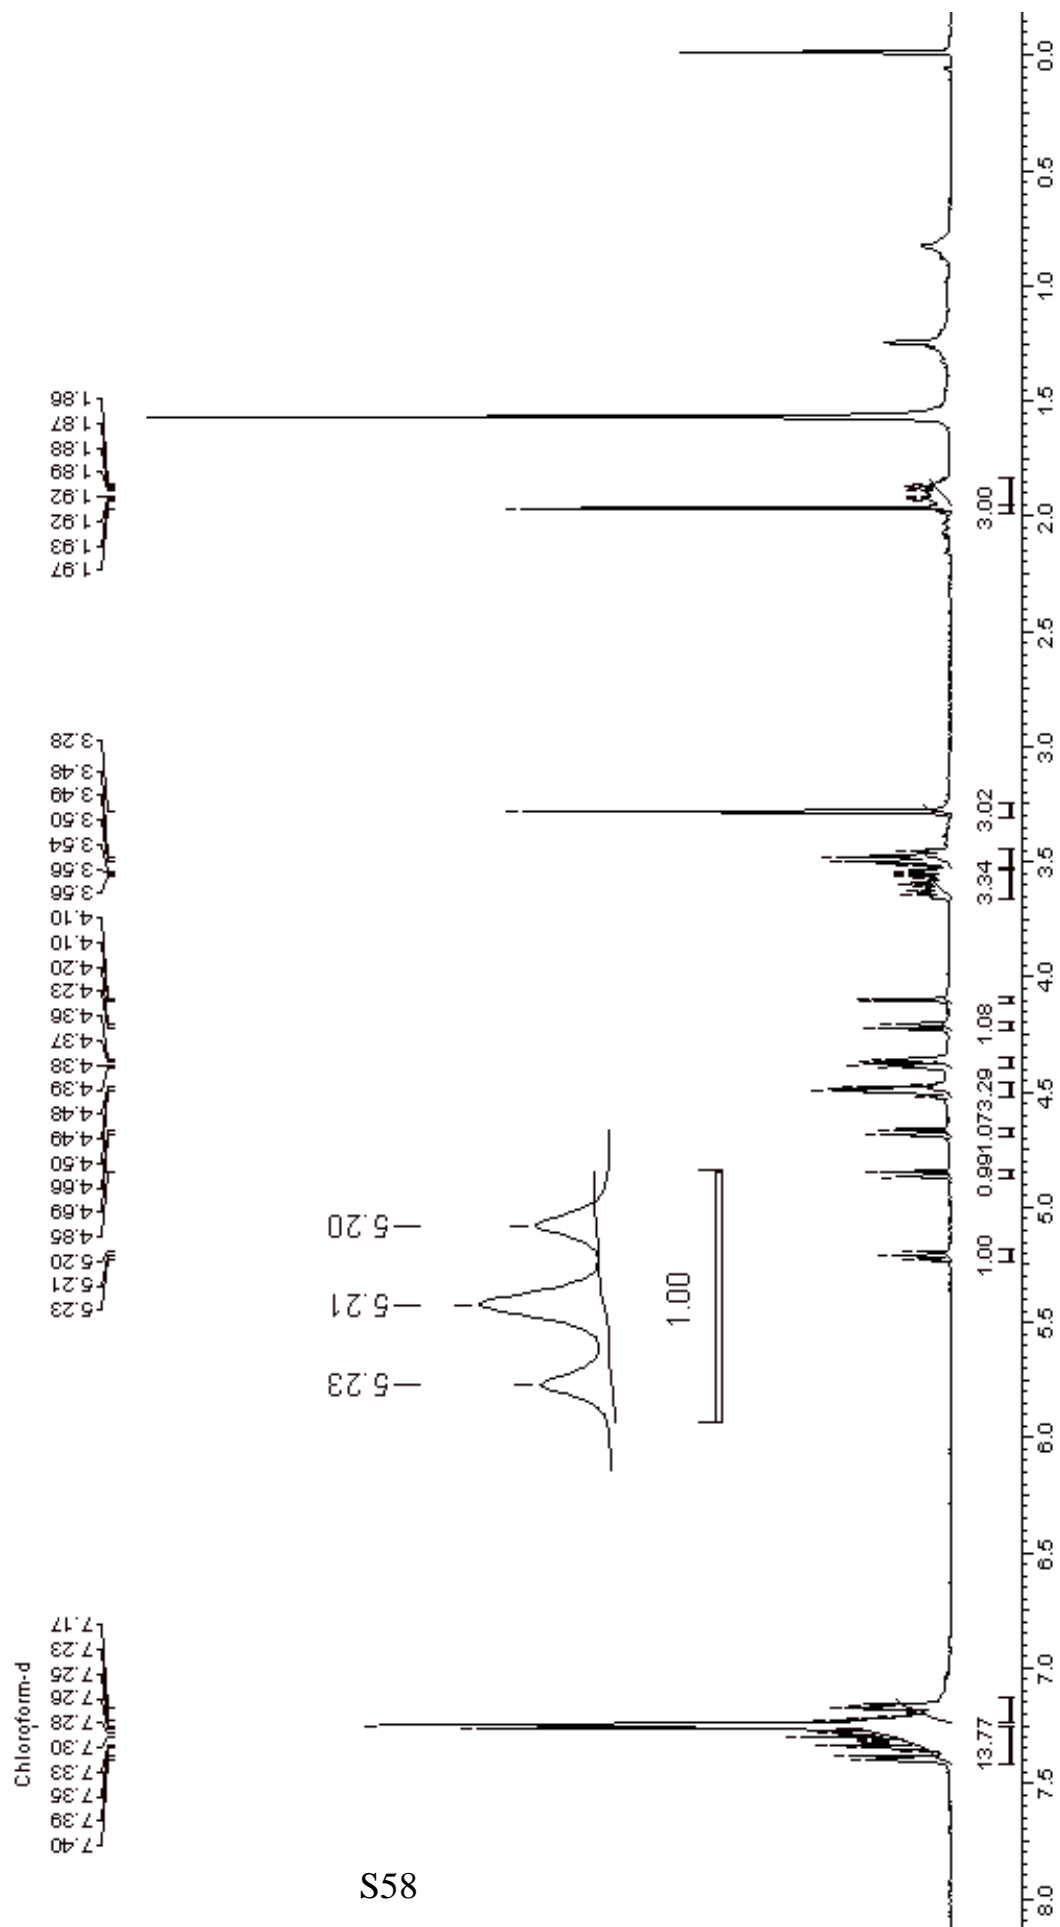

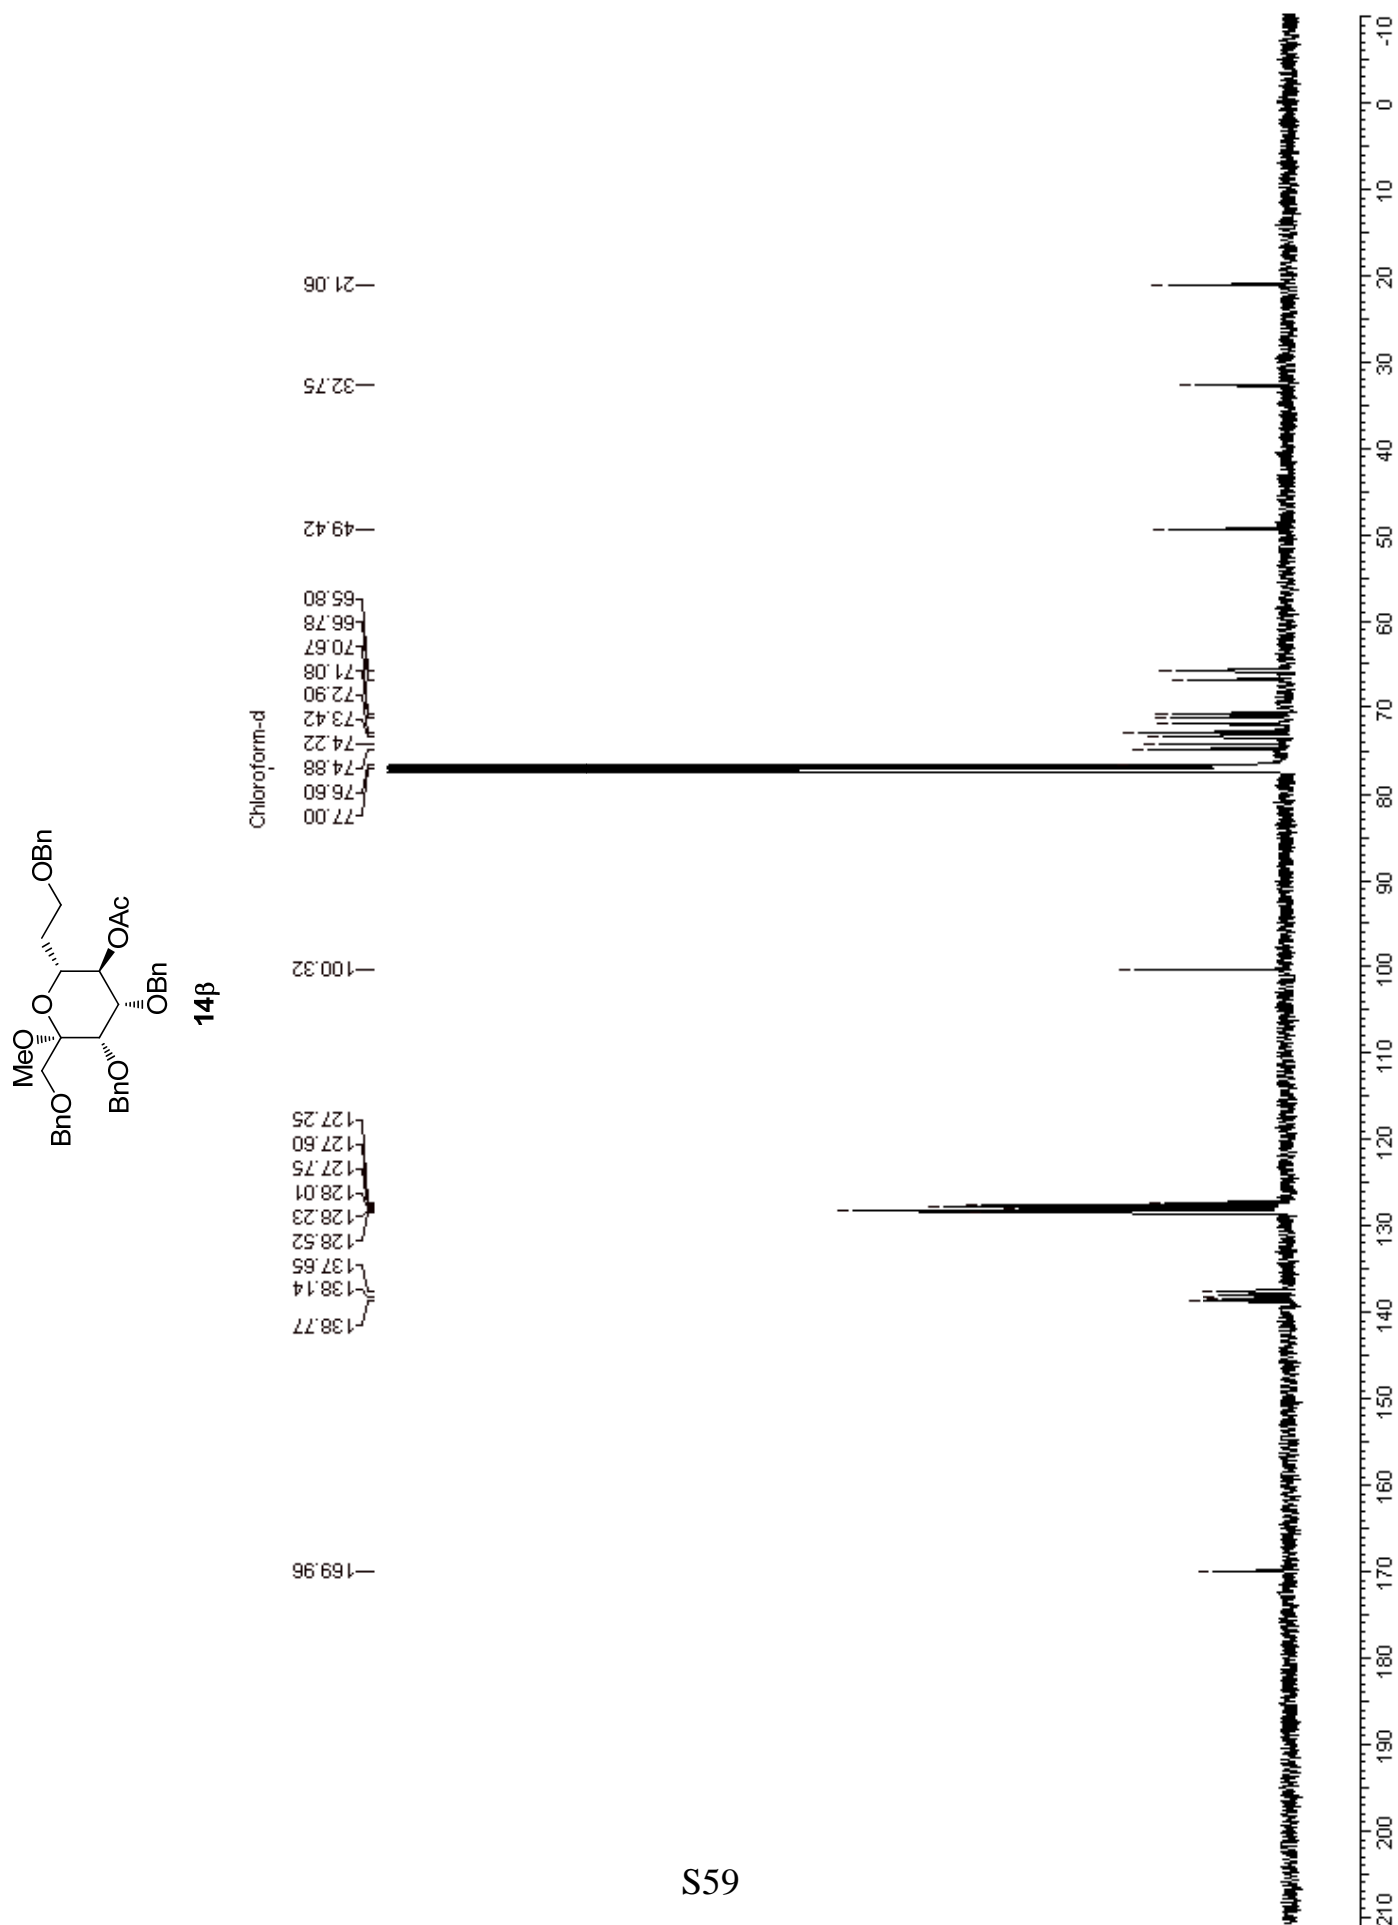

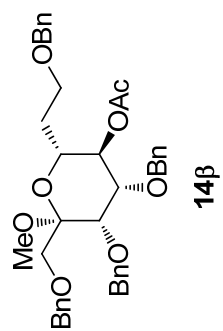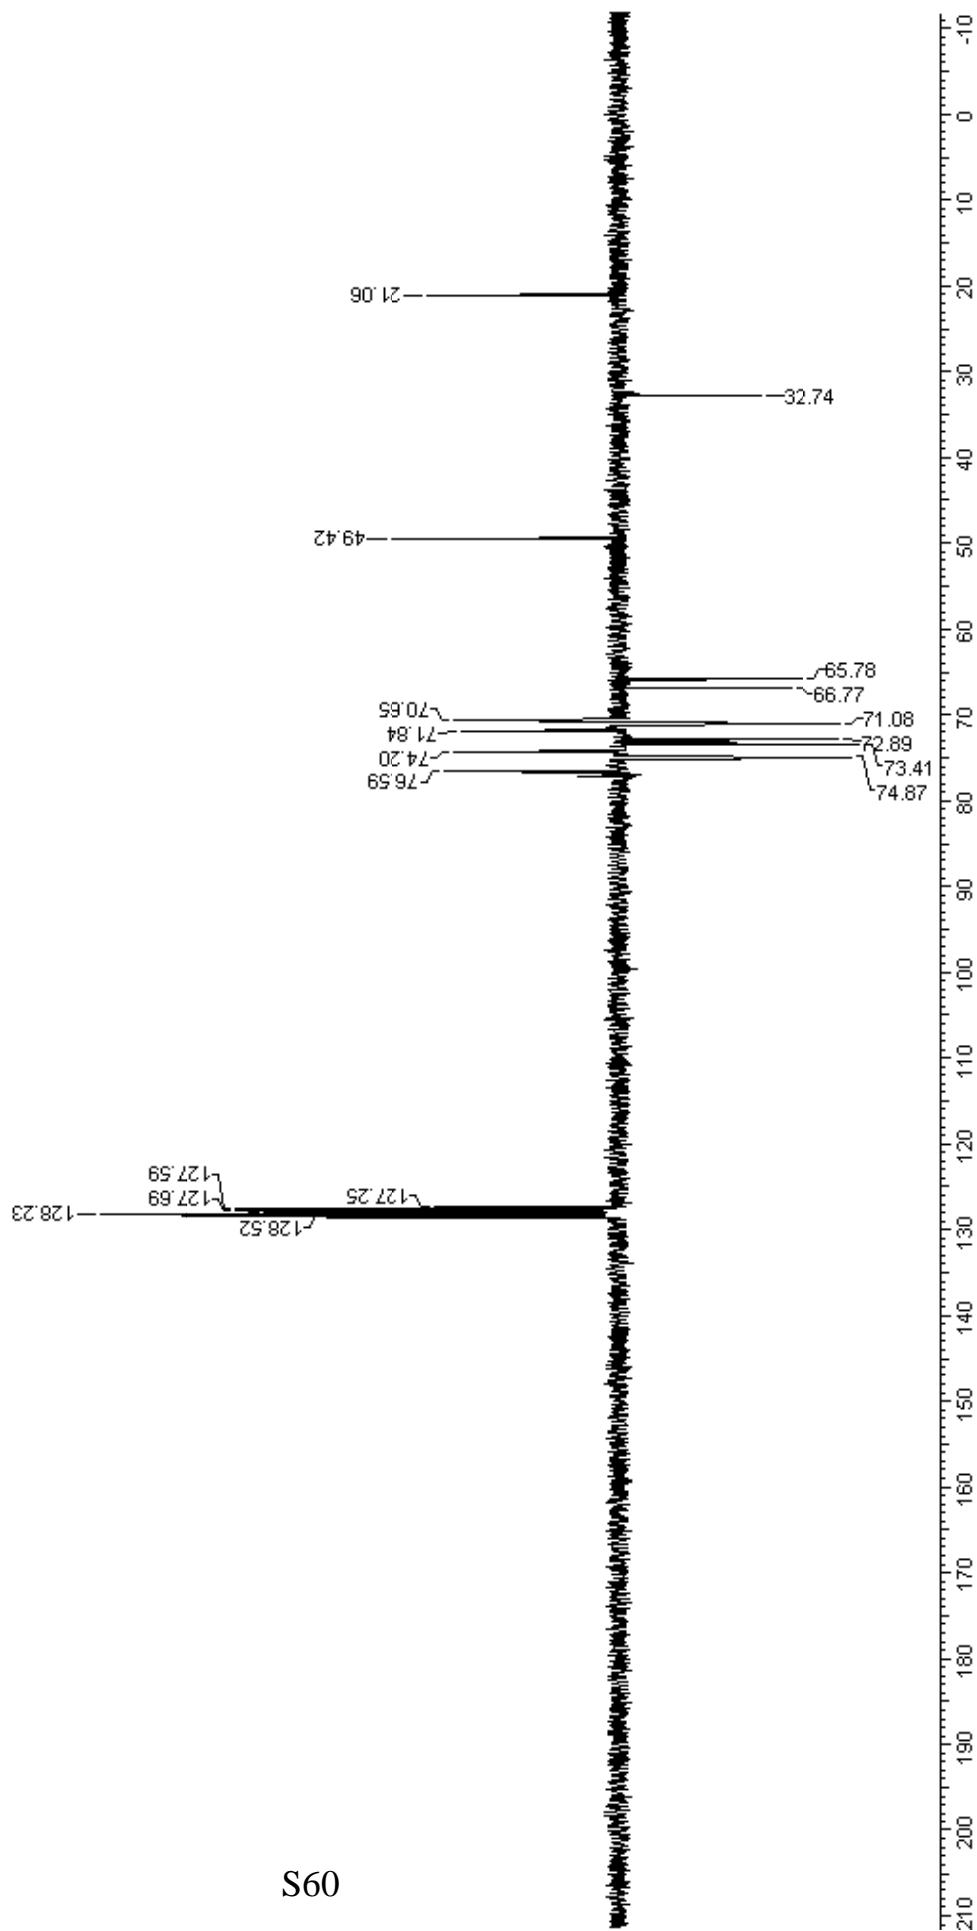

# COSY-14β

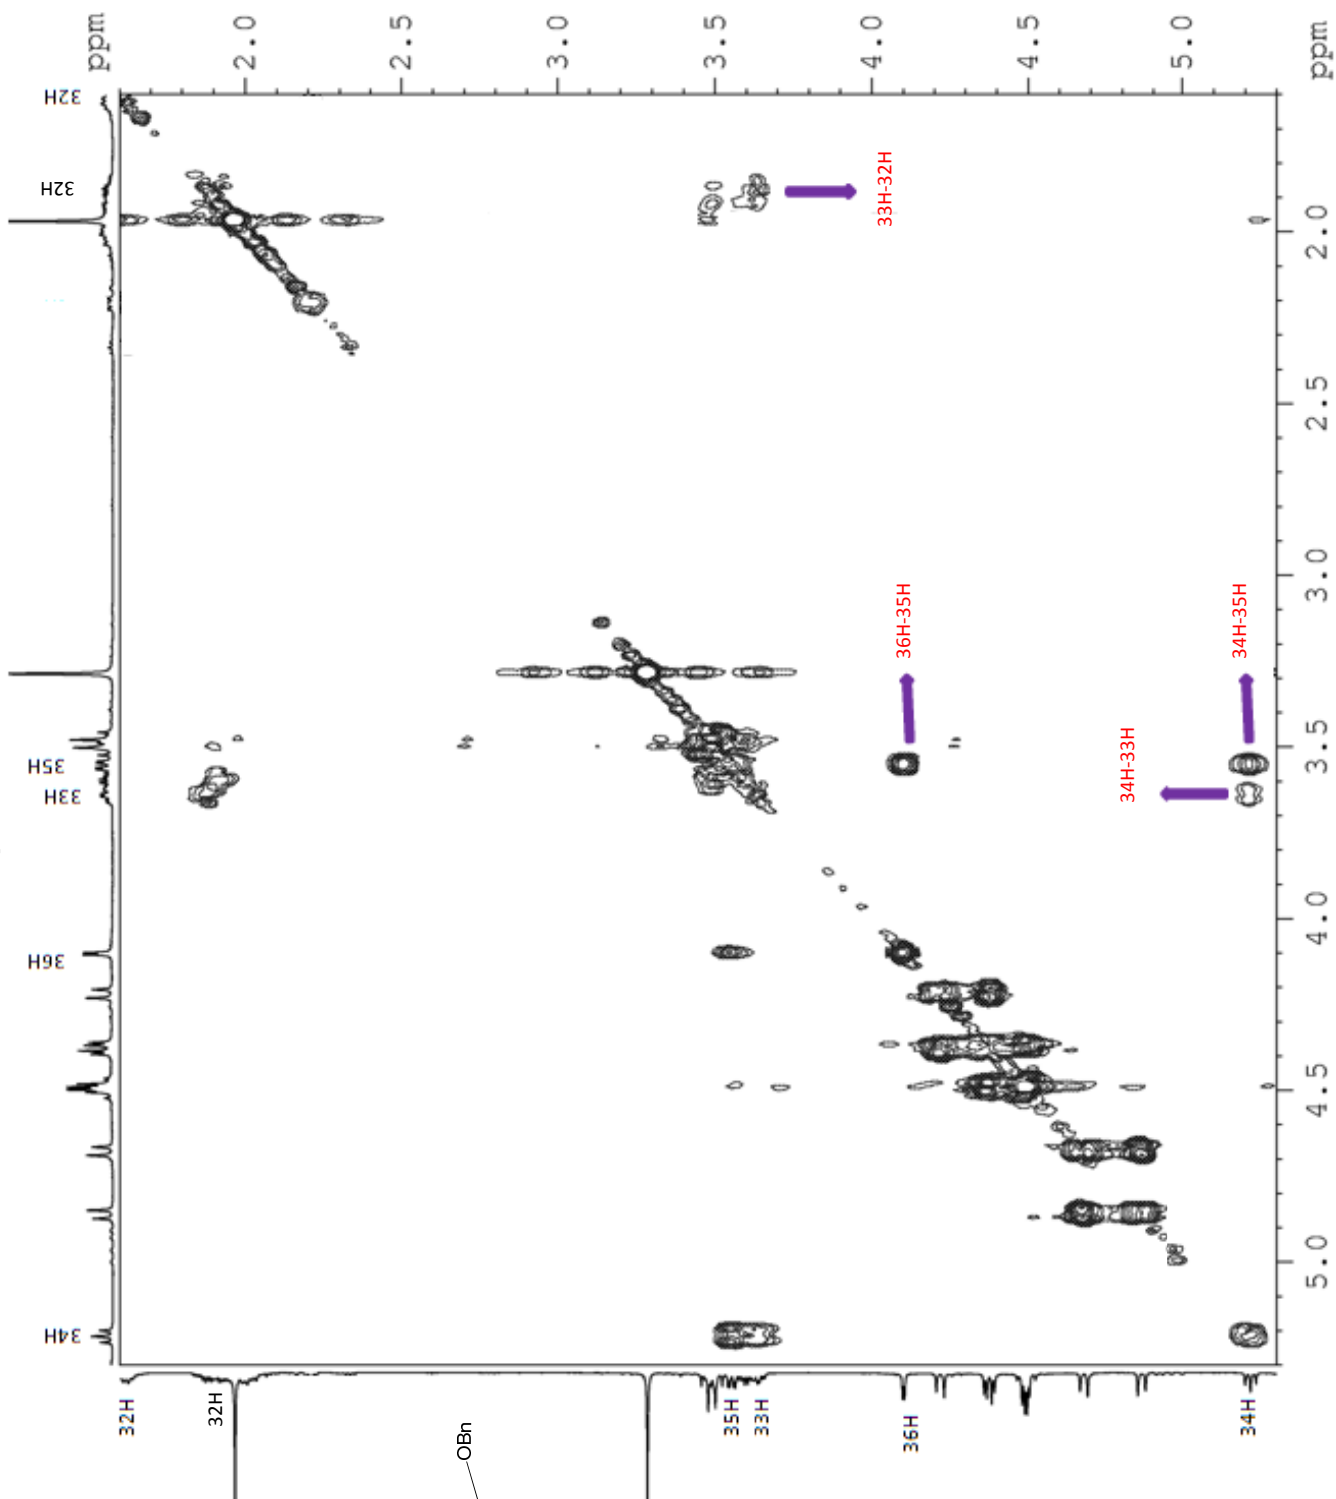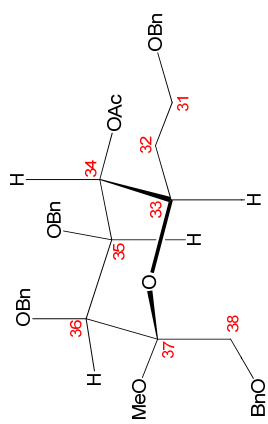

# NOESY-14β

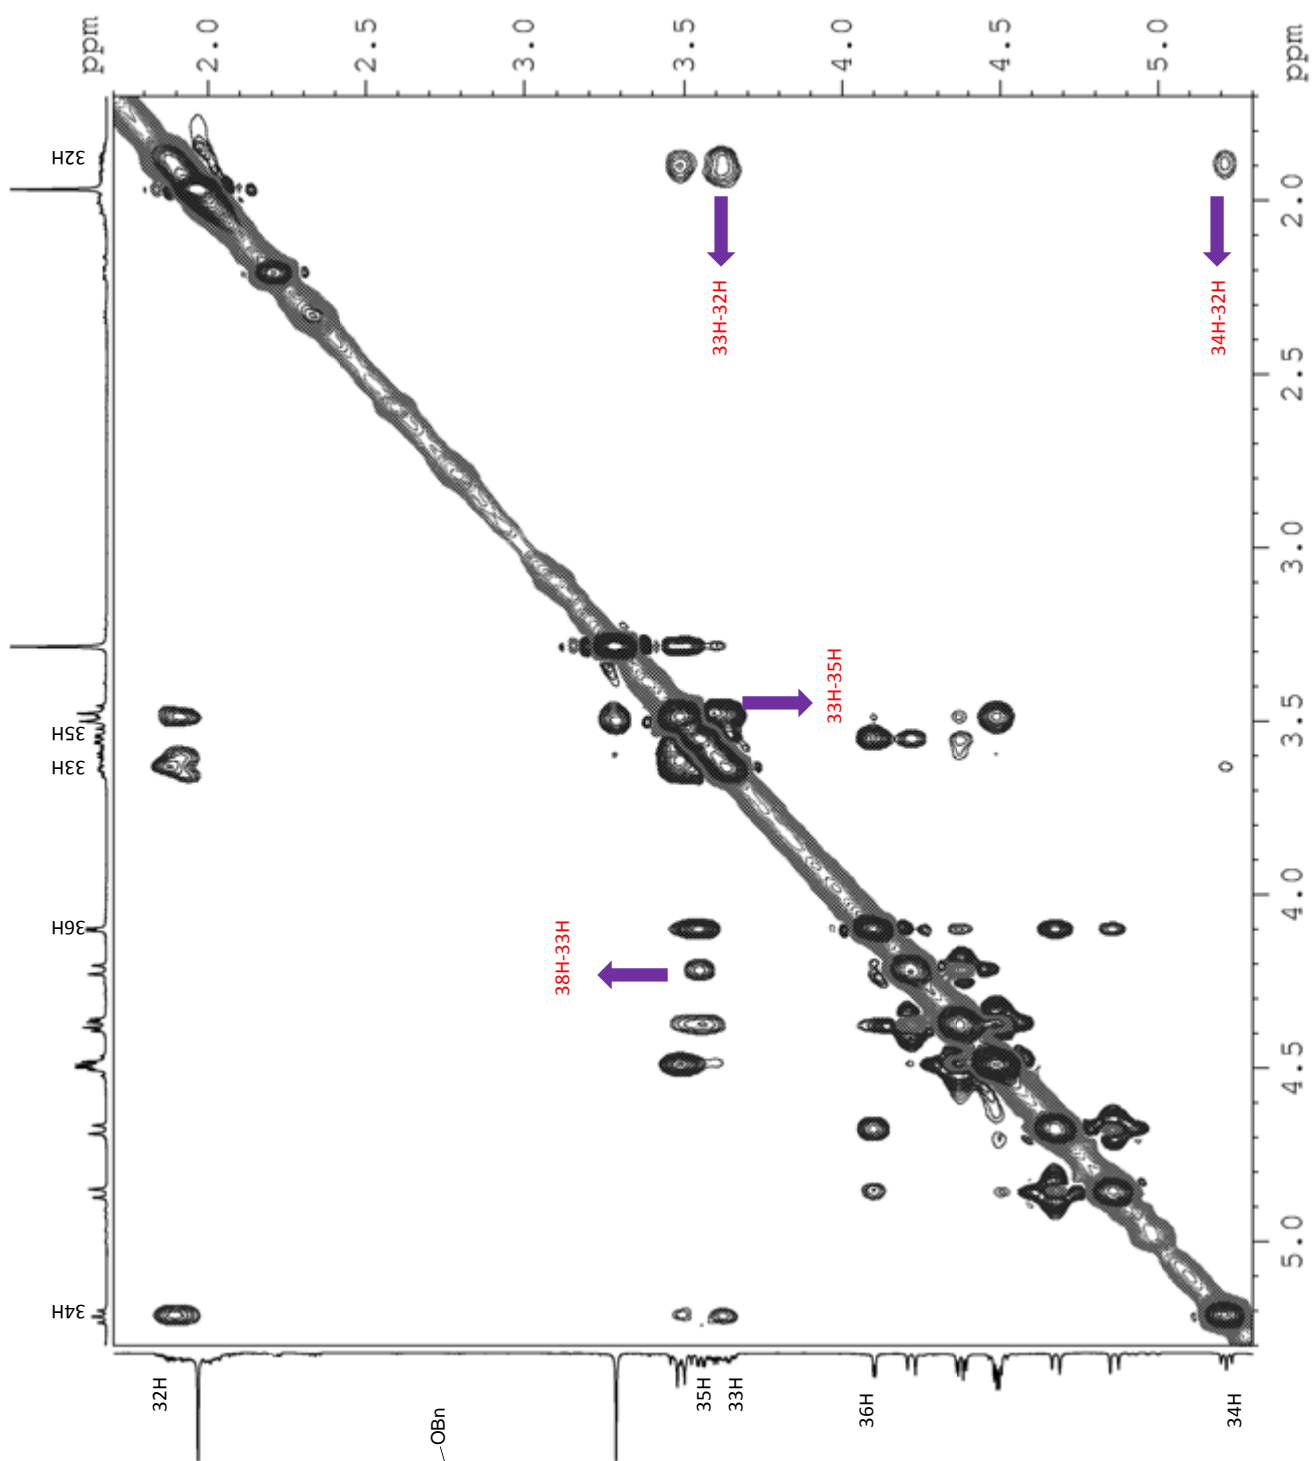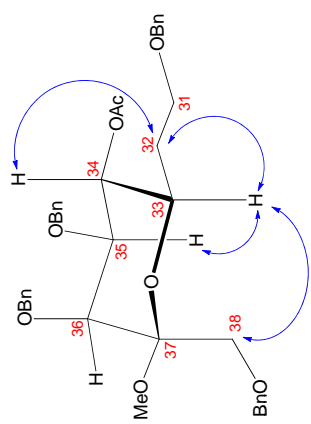

NOESY-14 $\beta$  (Expansion)

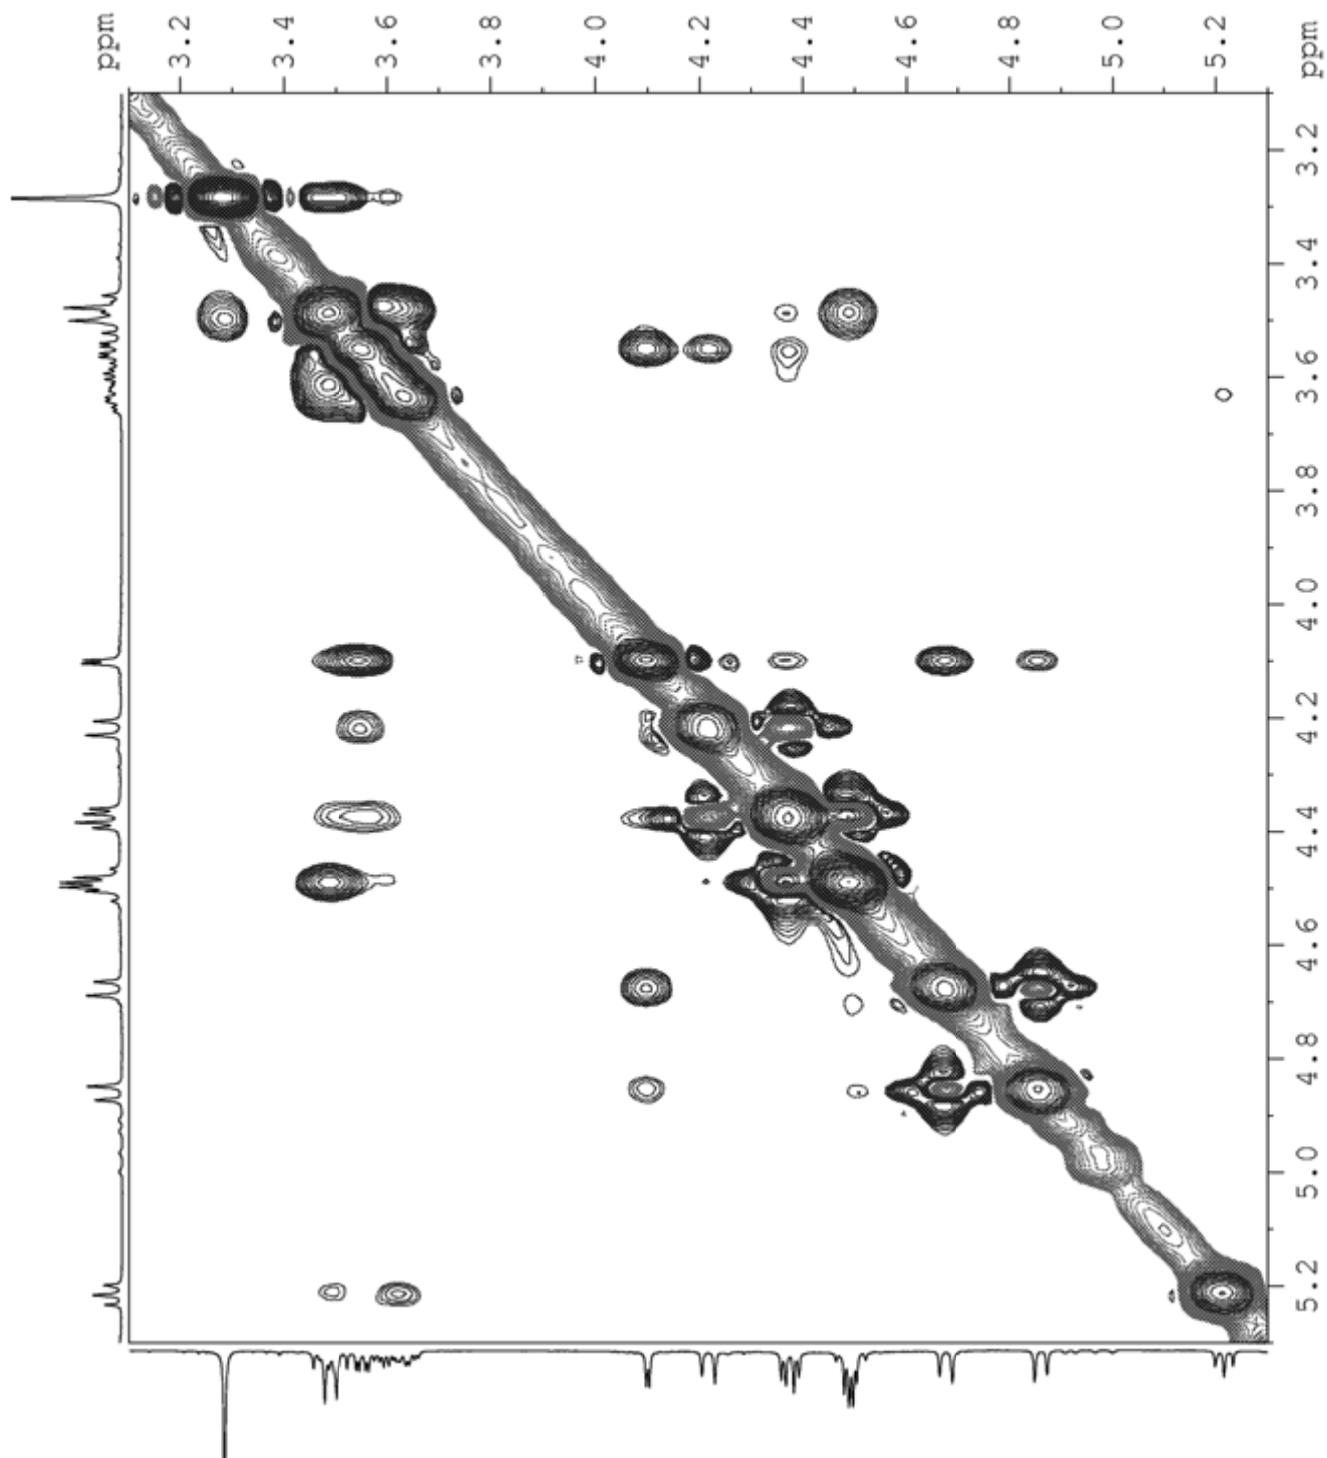

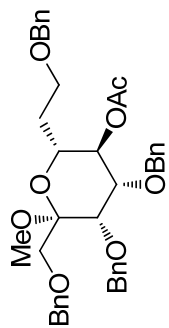

**14β**

9N-494 / 13β

\*LCMSMS - Q STAR PULSAR

+TOF MS: 0.567 to 0.983 min from sn\_494.wiff  
a=3.28594663340941780e-004, t0=-3.49418683411422530e+001

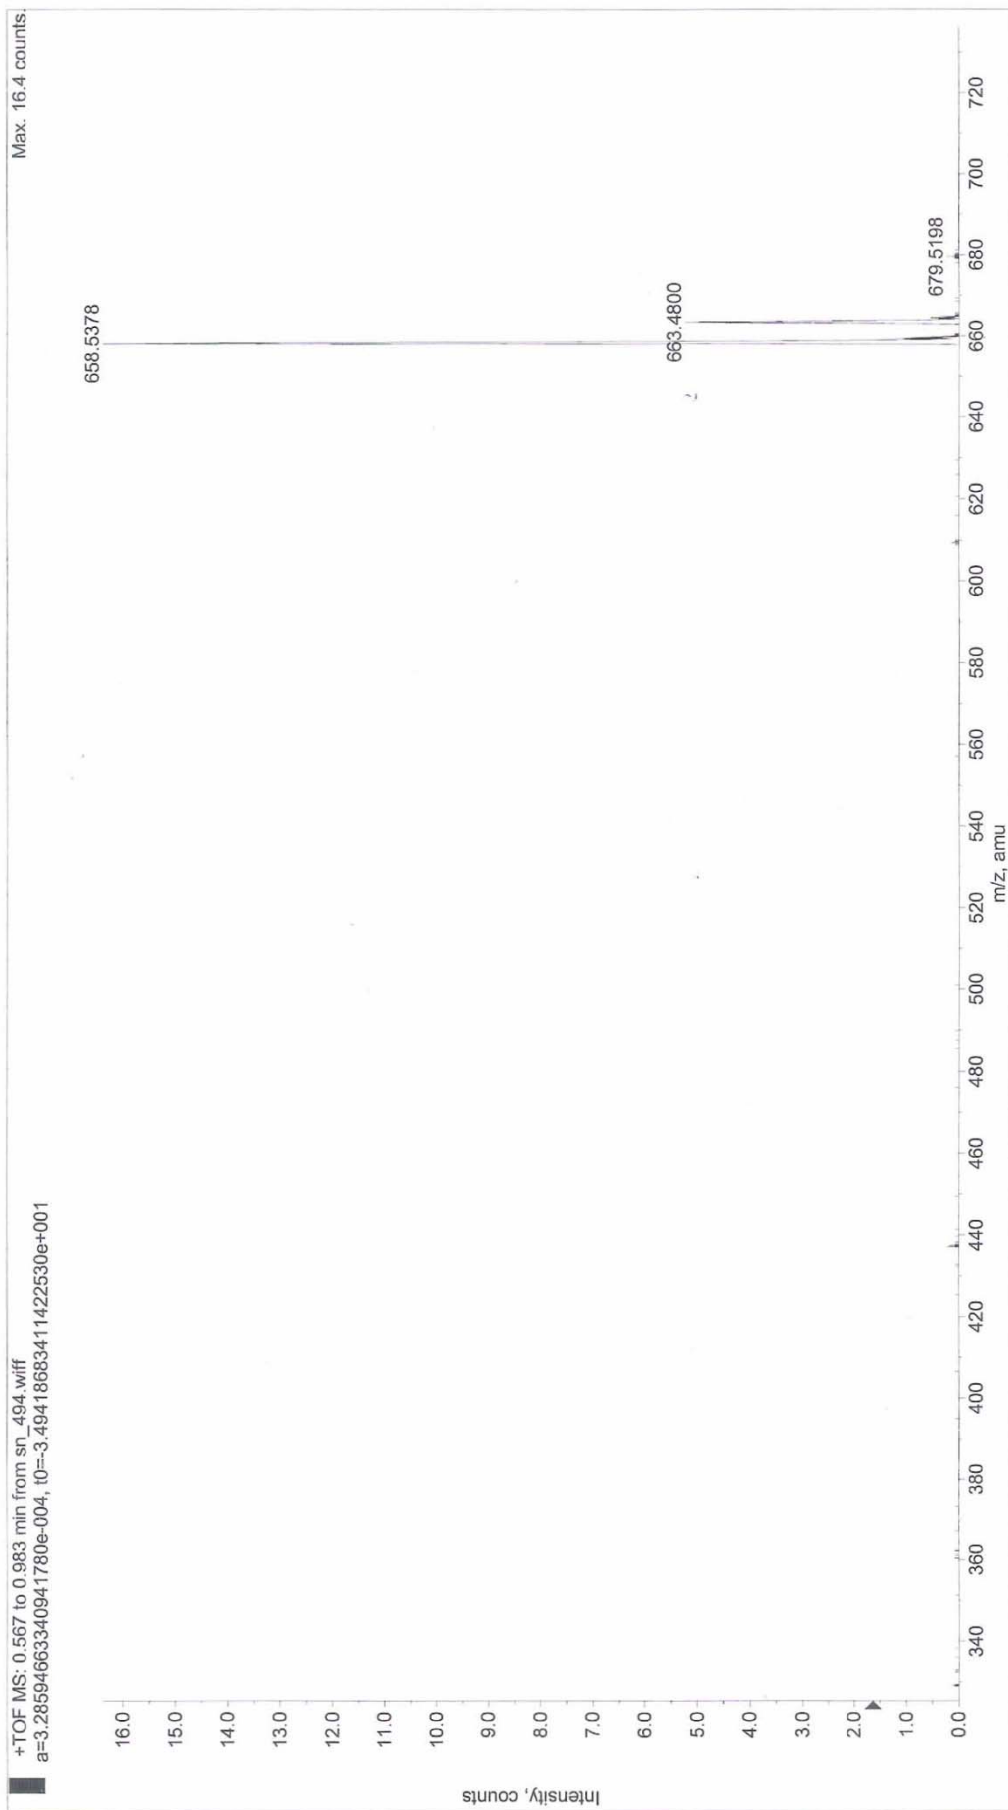



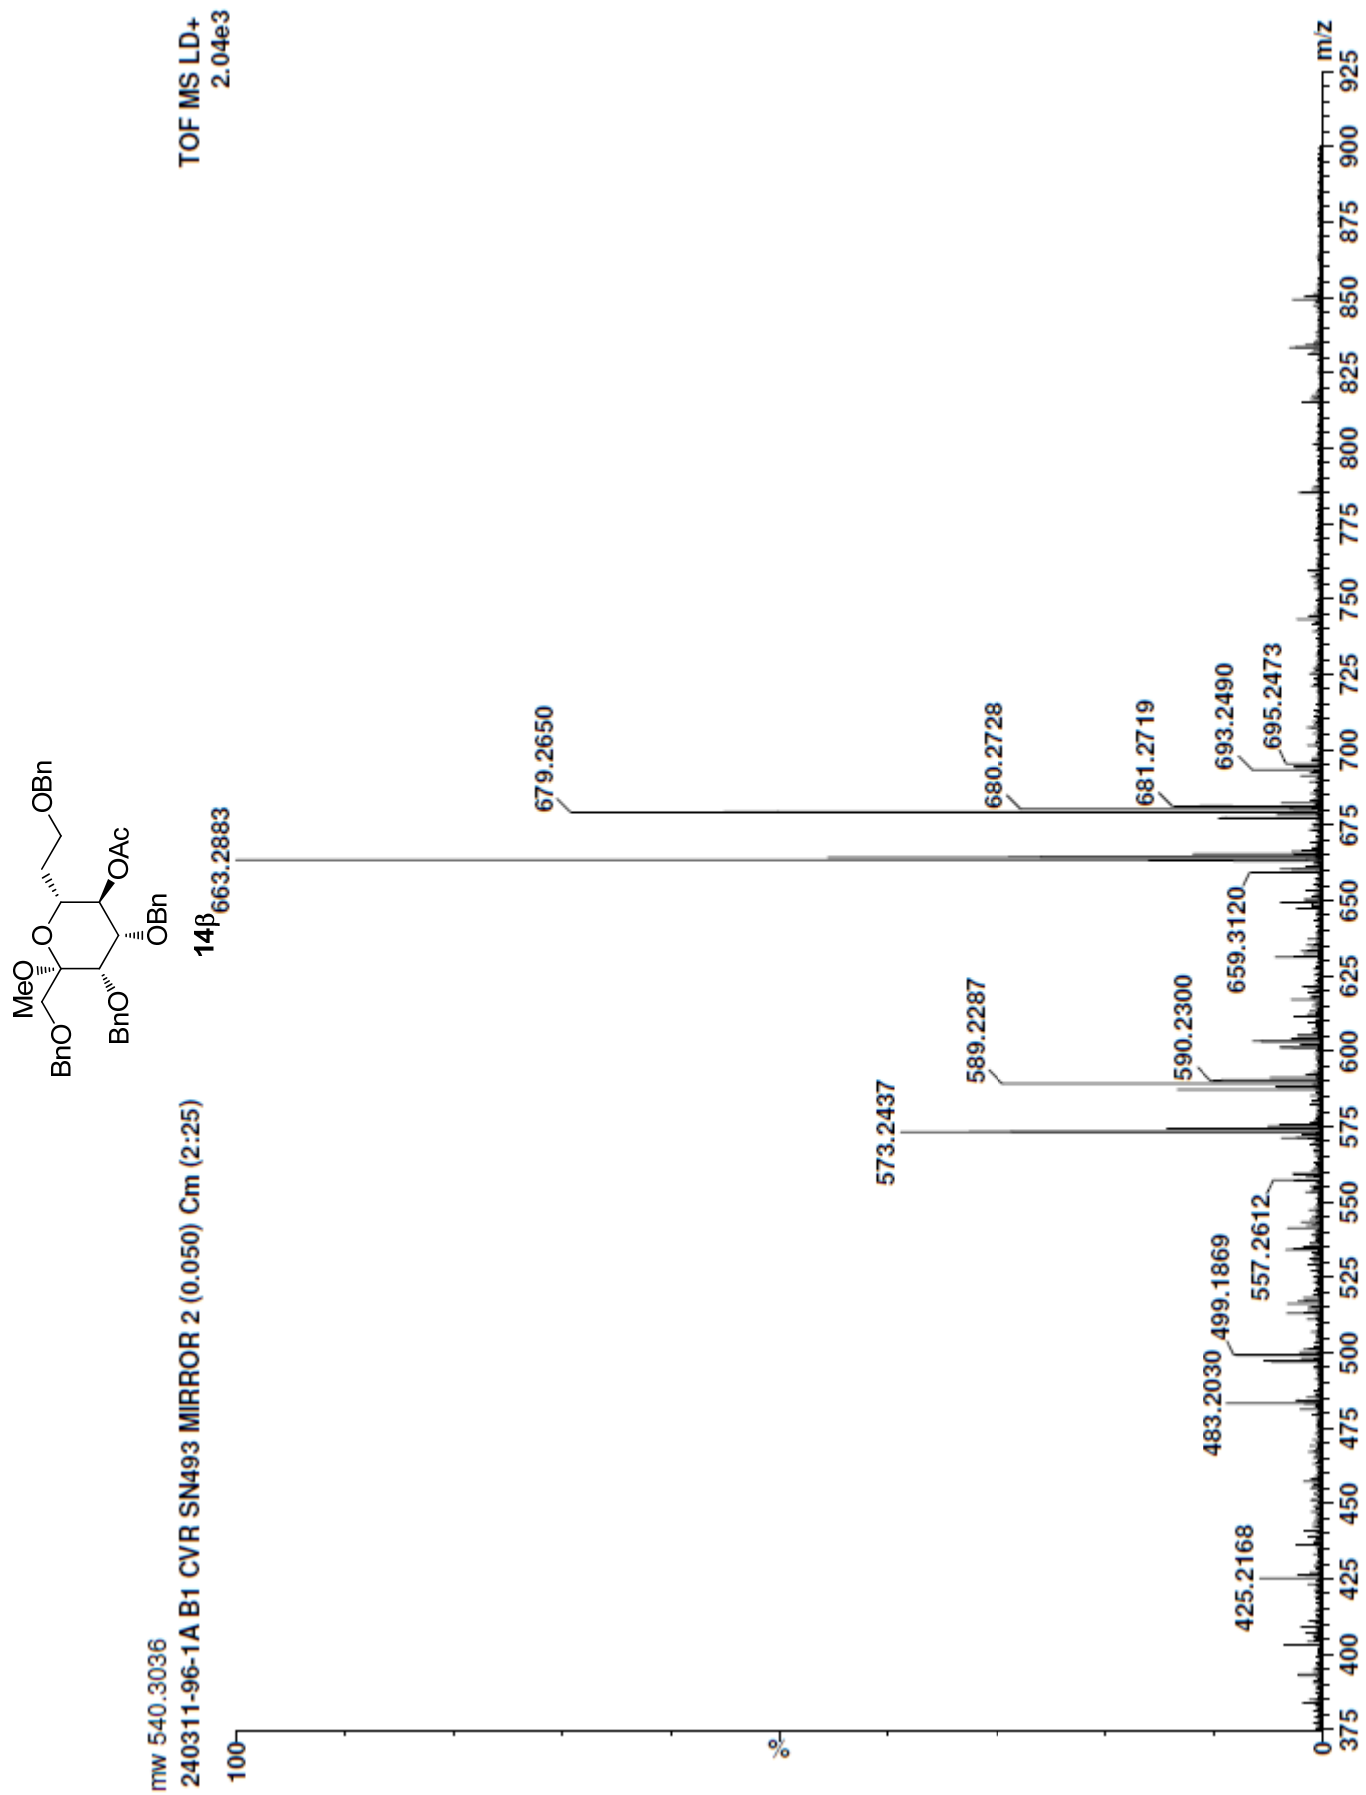

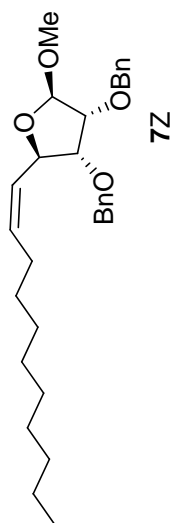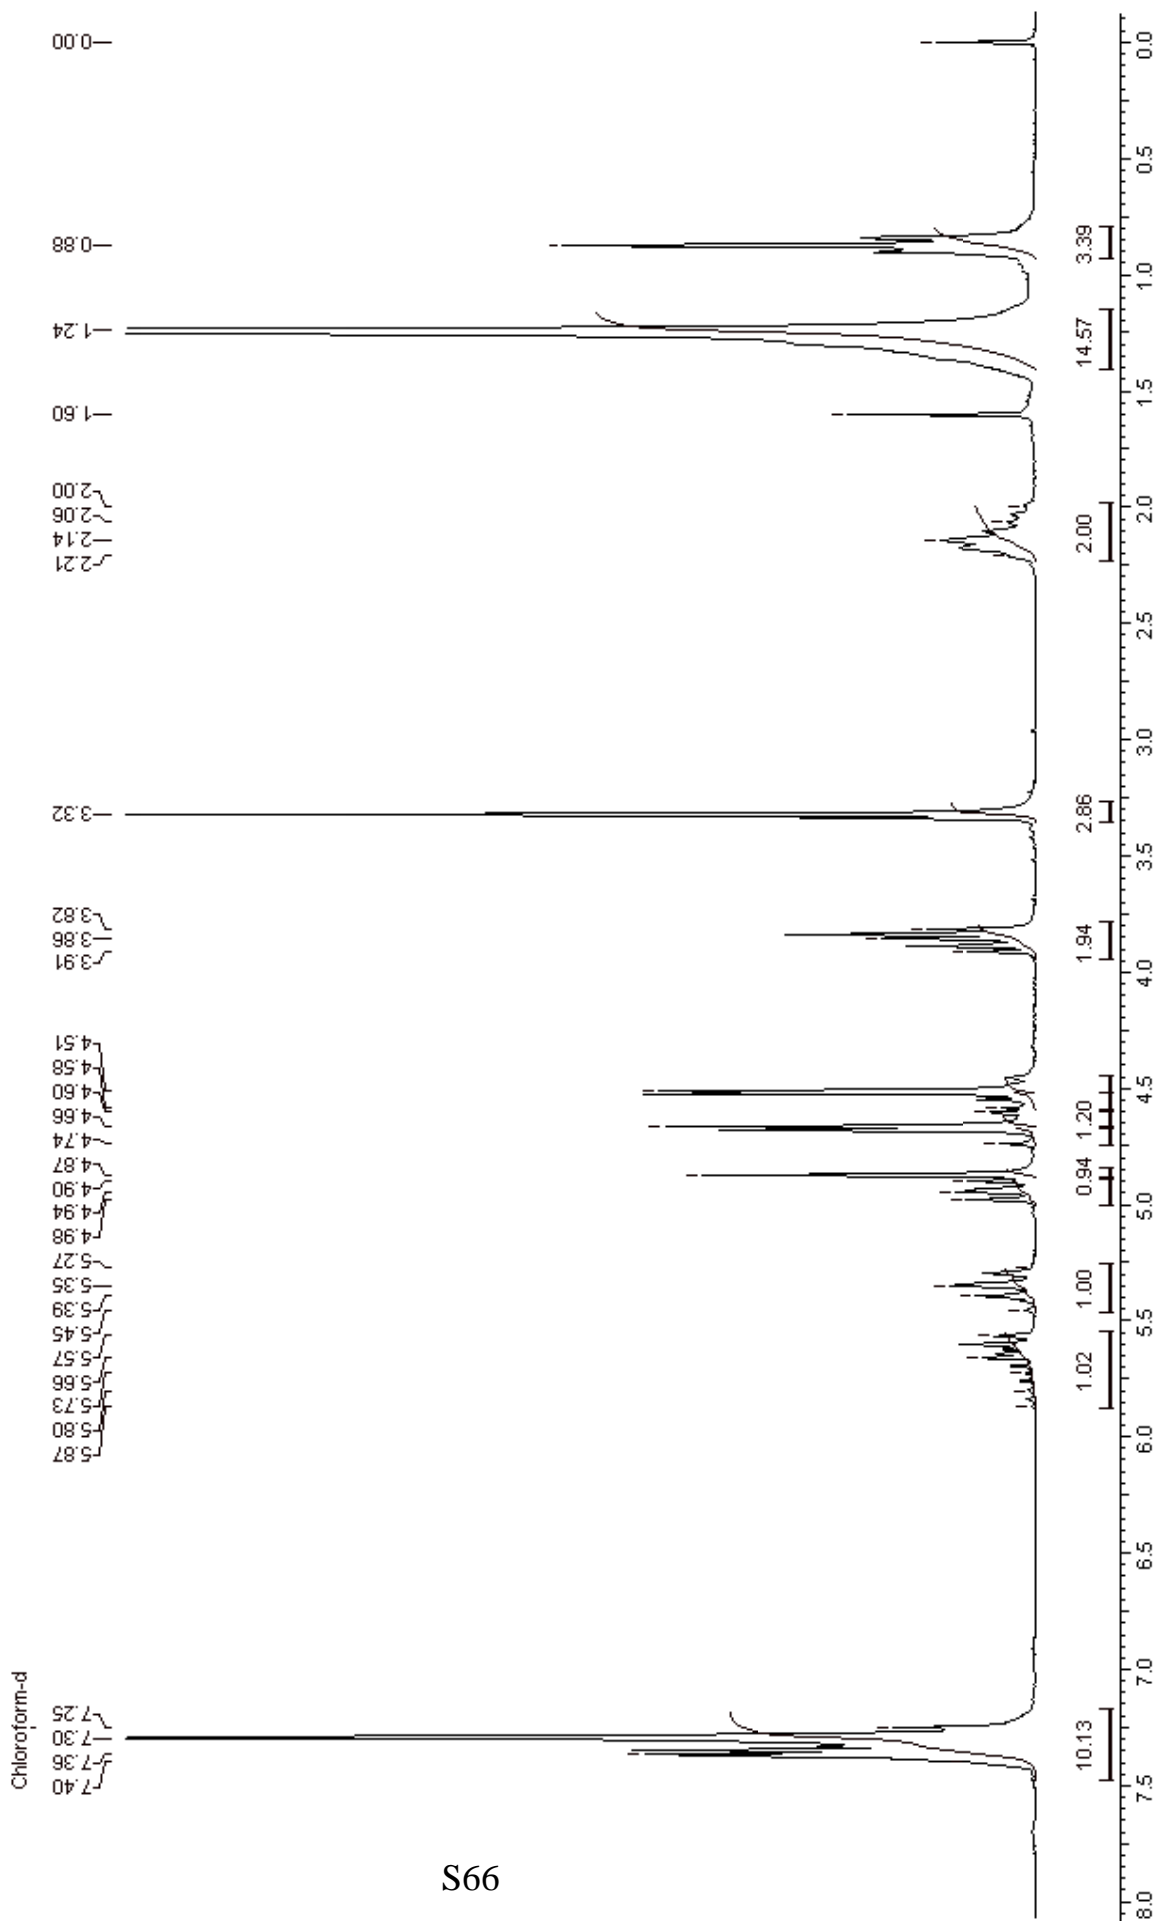

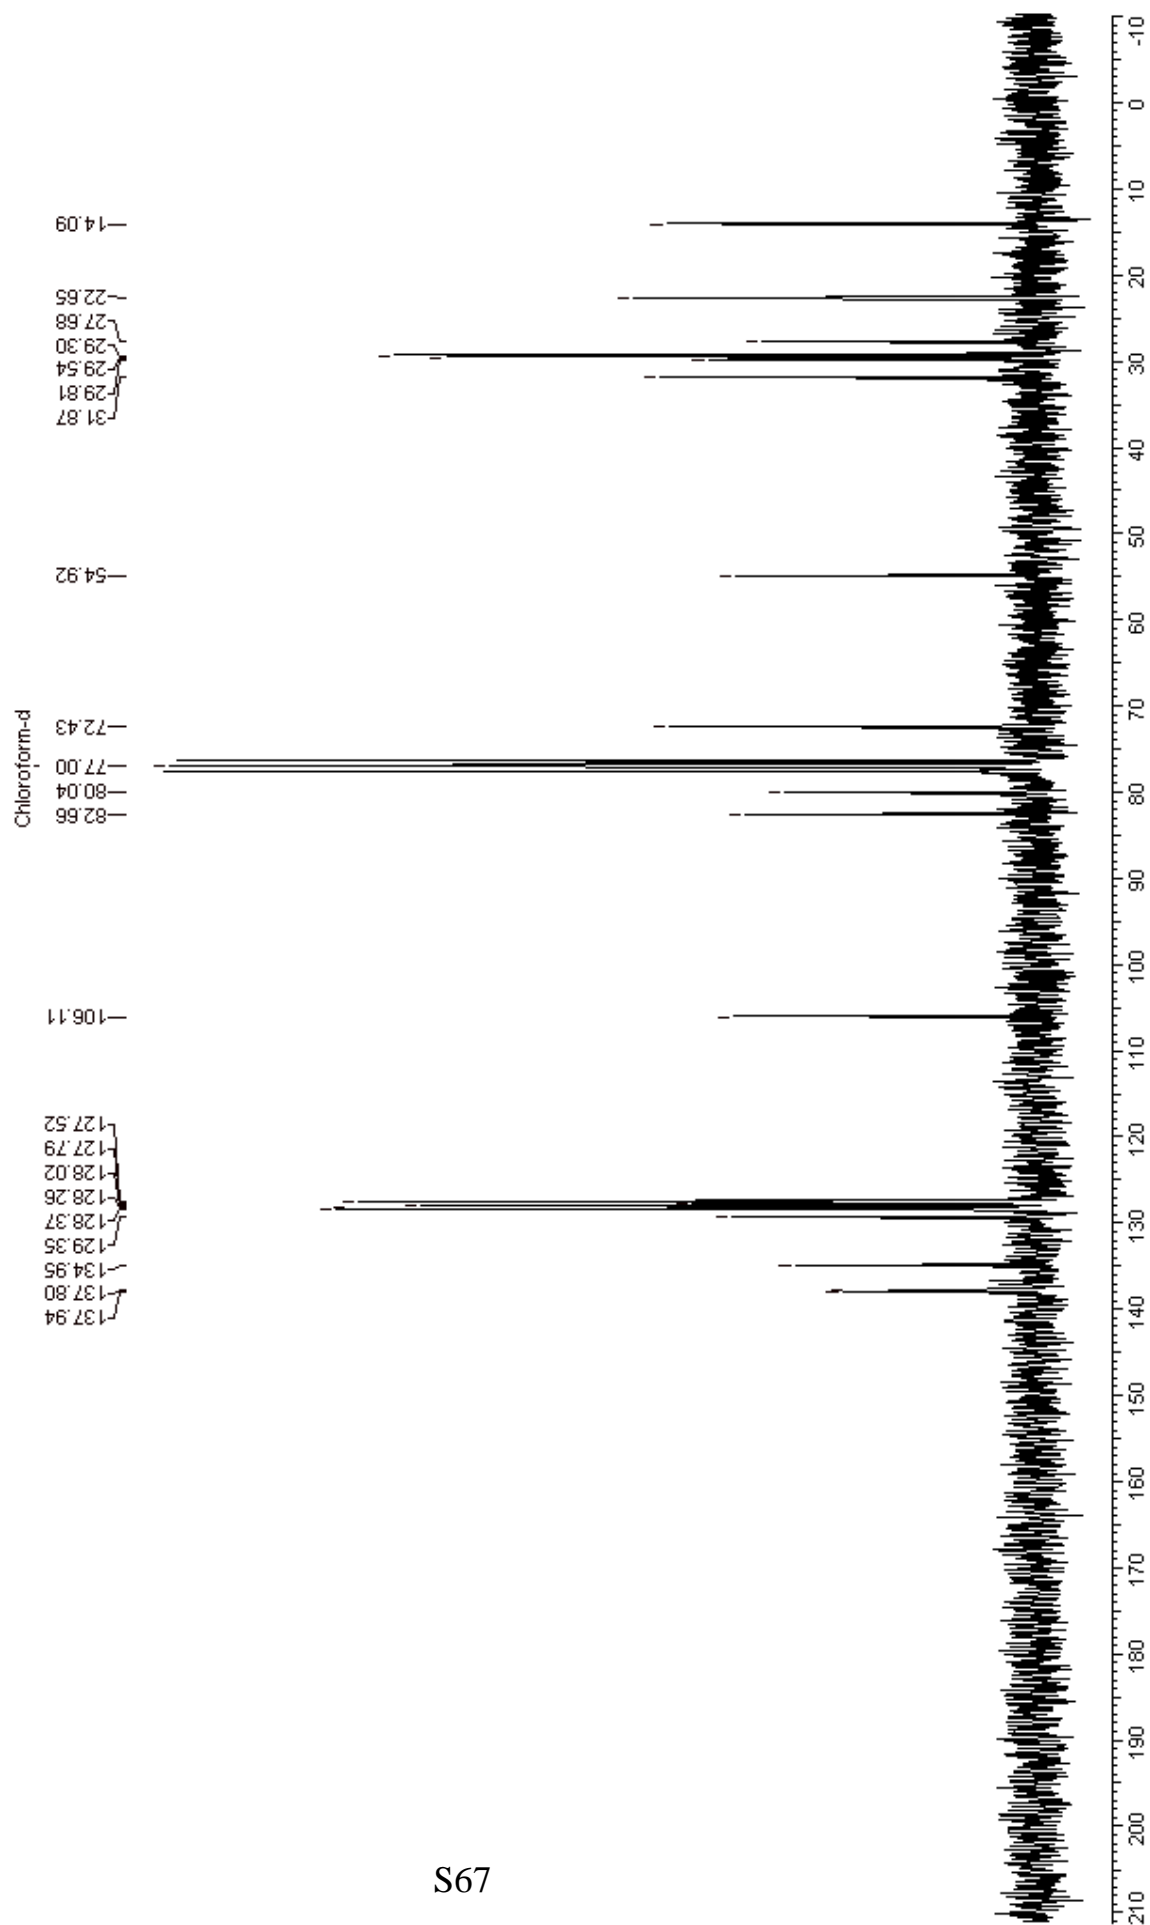

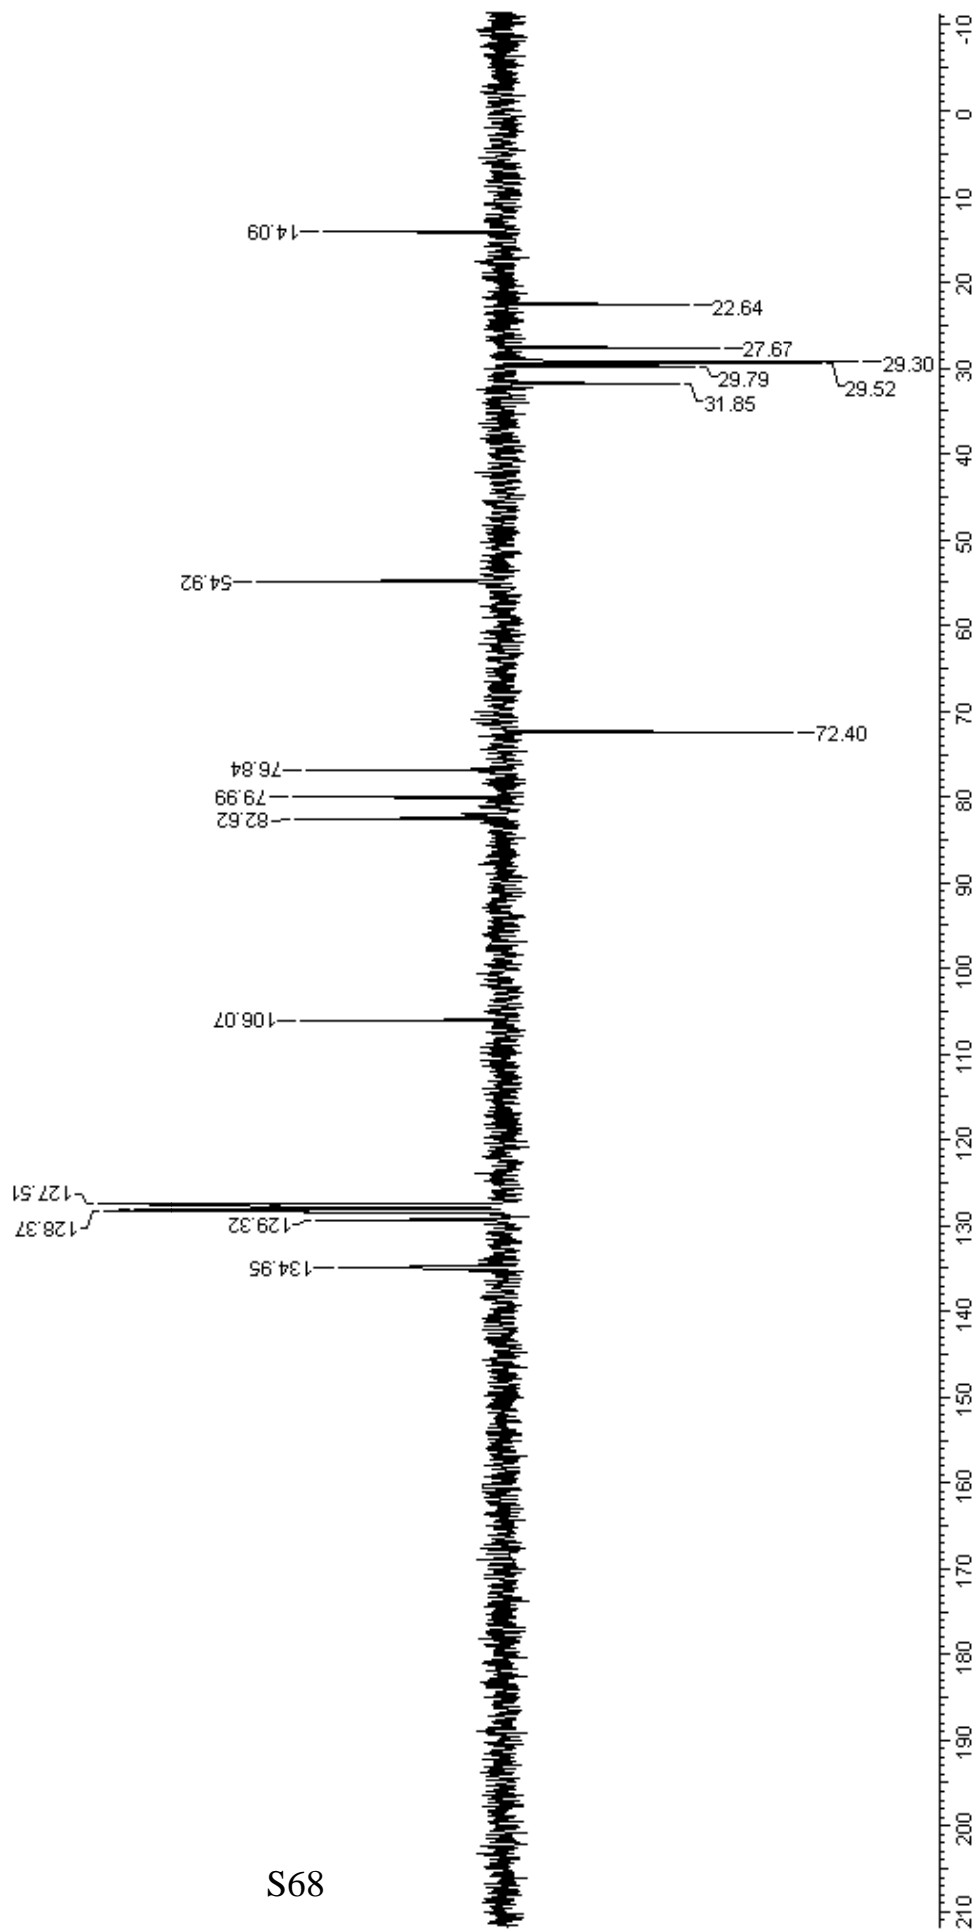

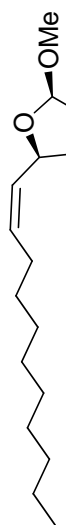

**Spectrum Report**  
7Z

SN-406 / 7

Final - Shots 750 - IISER; Run #90; Label O4

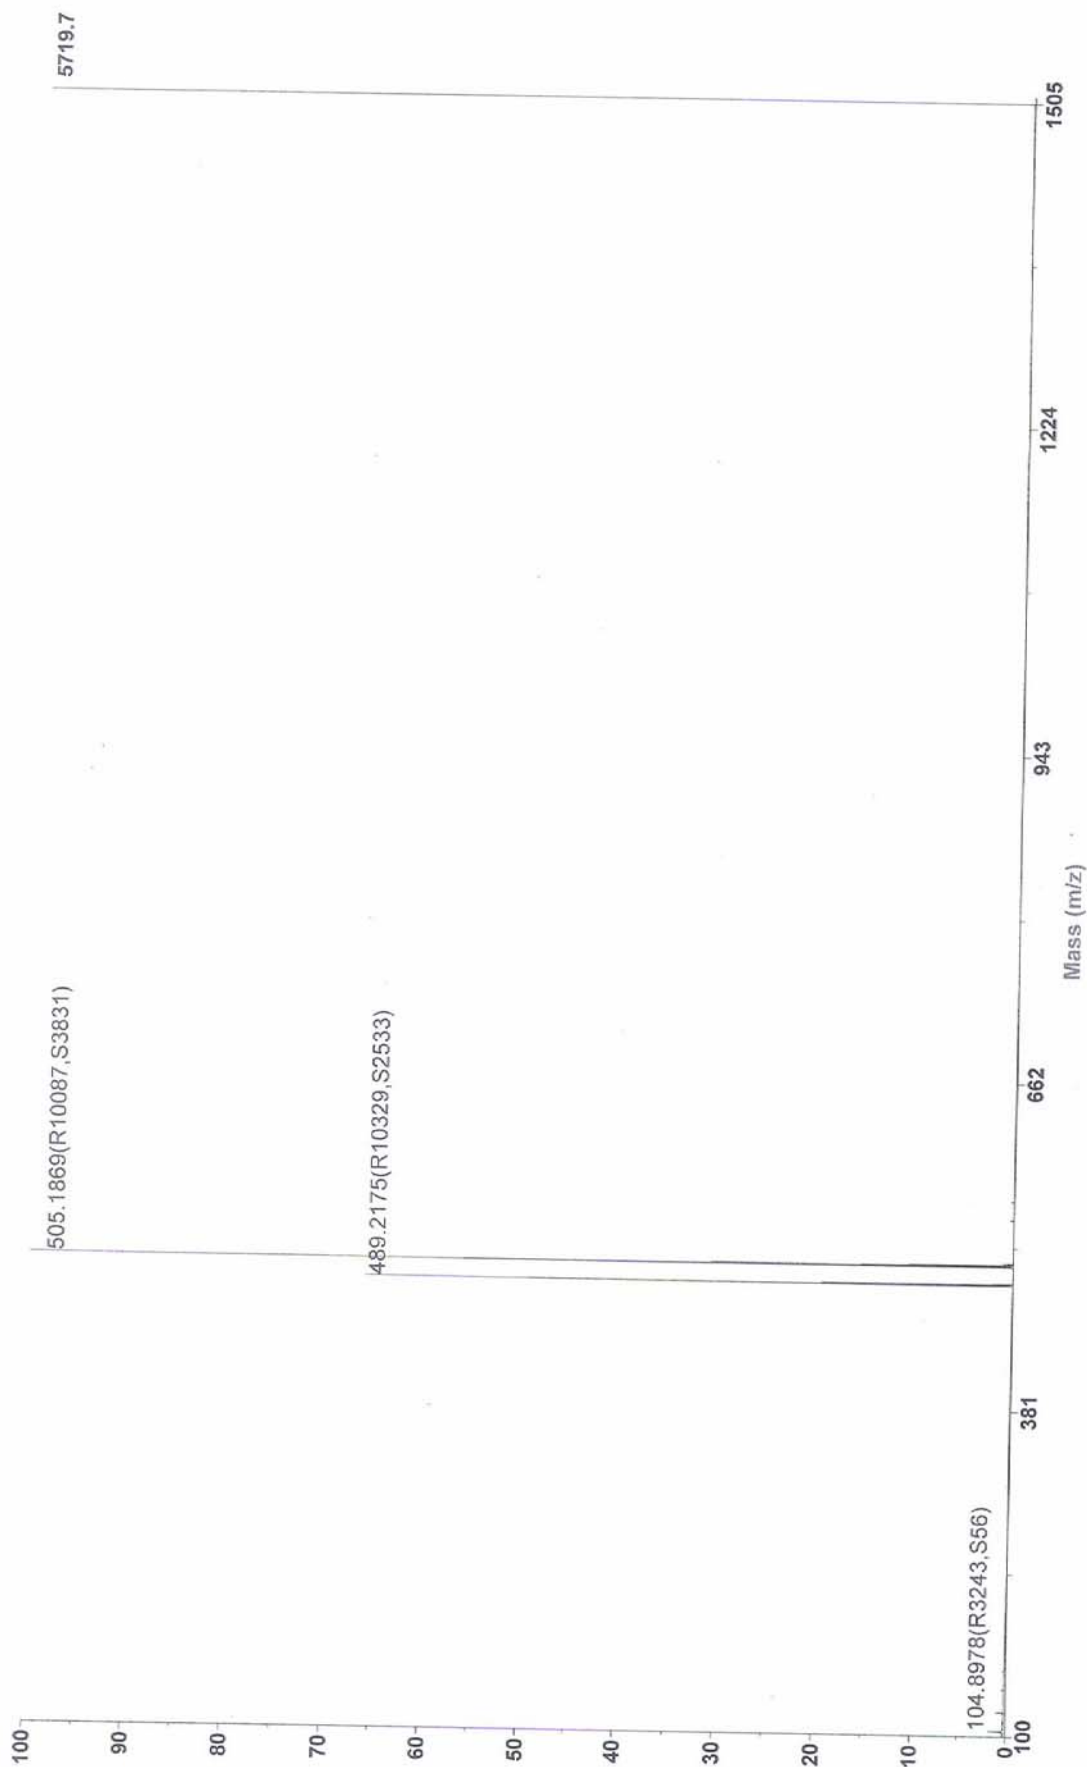

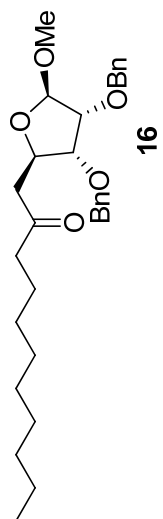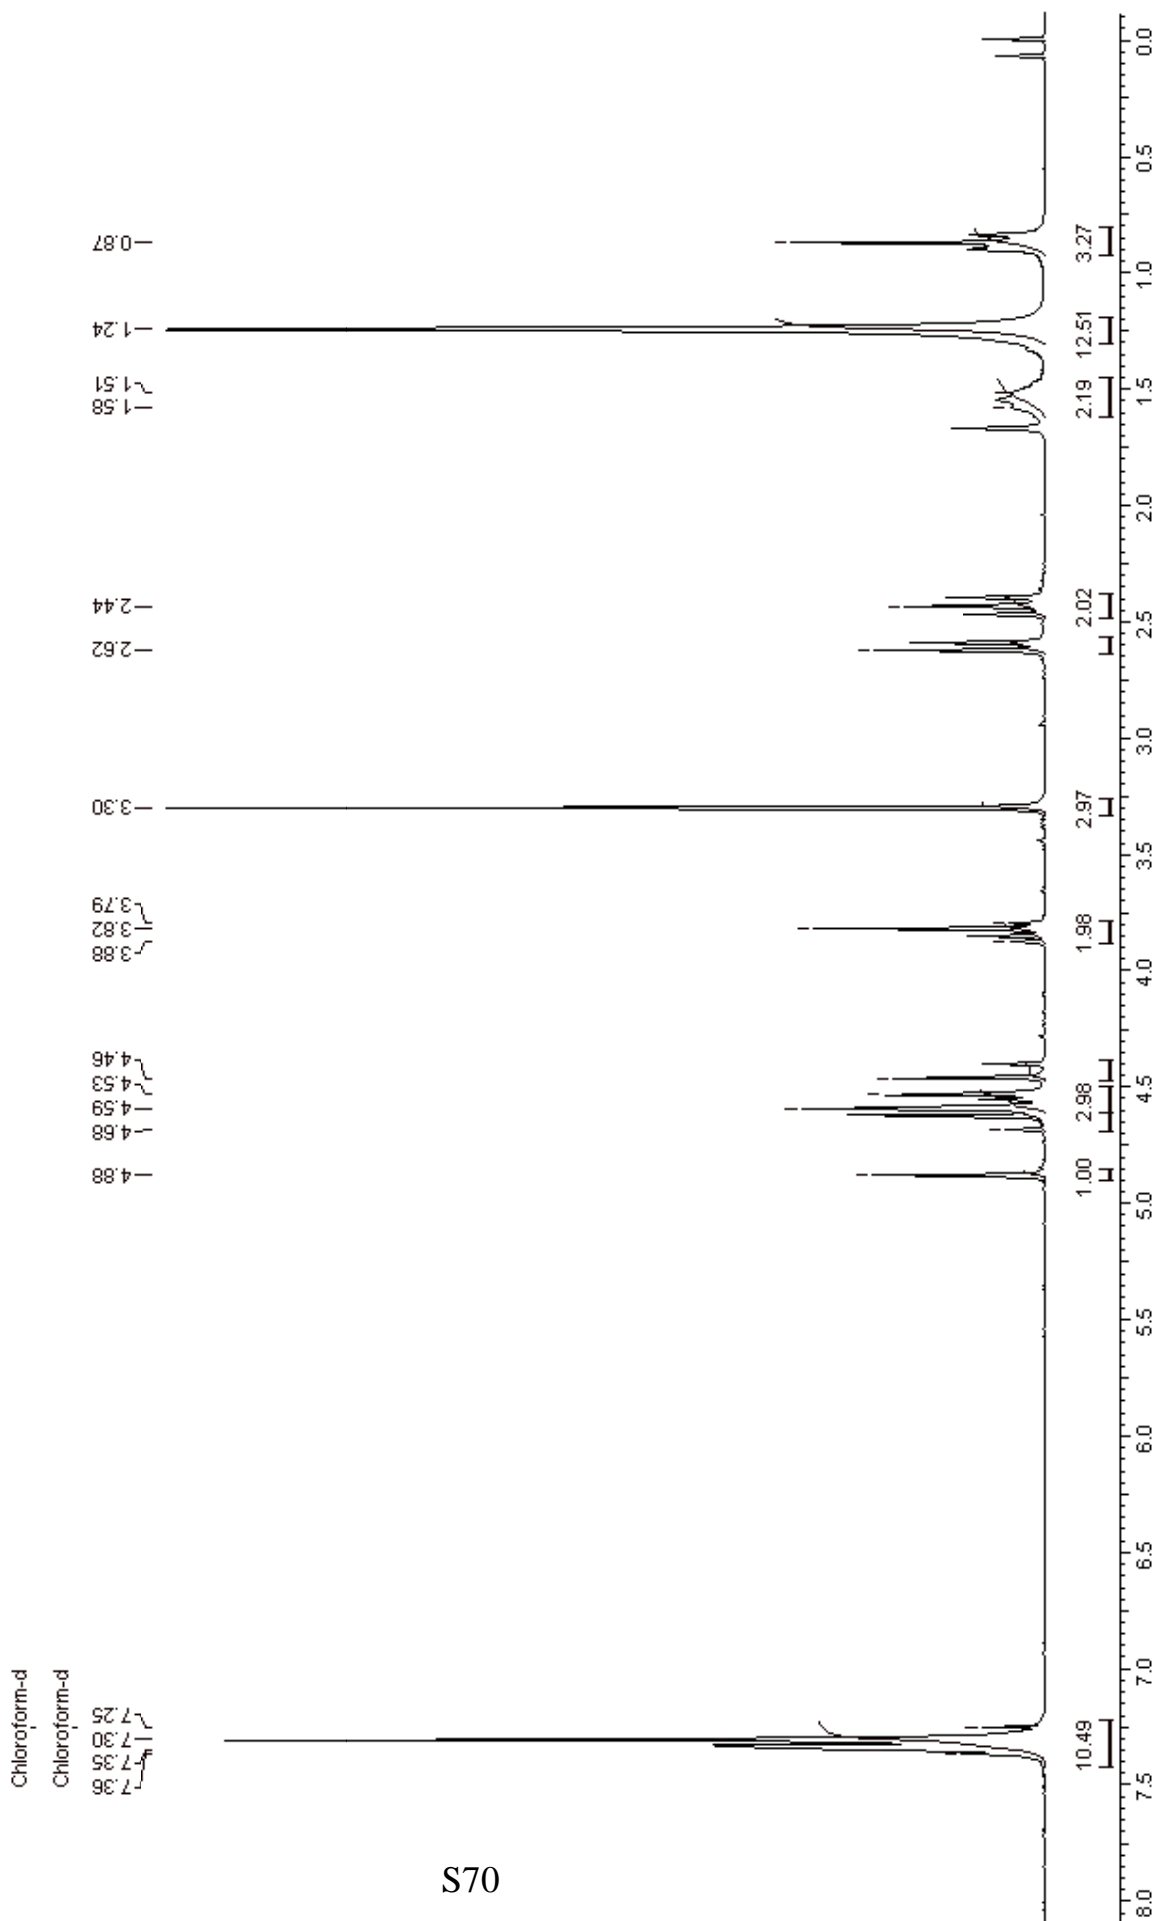

S70

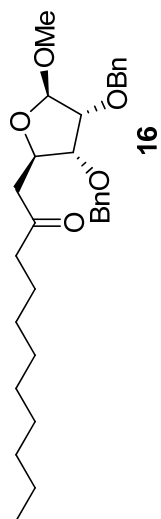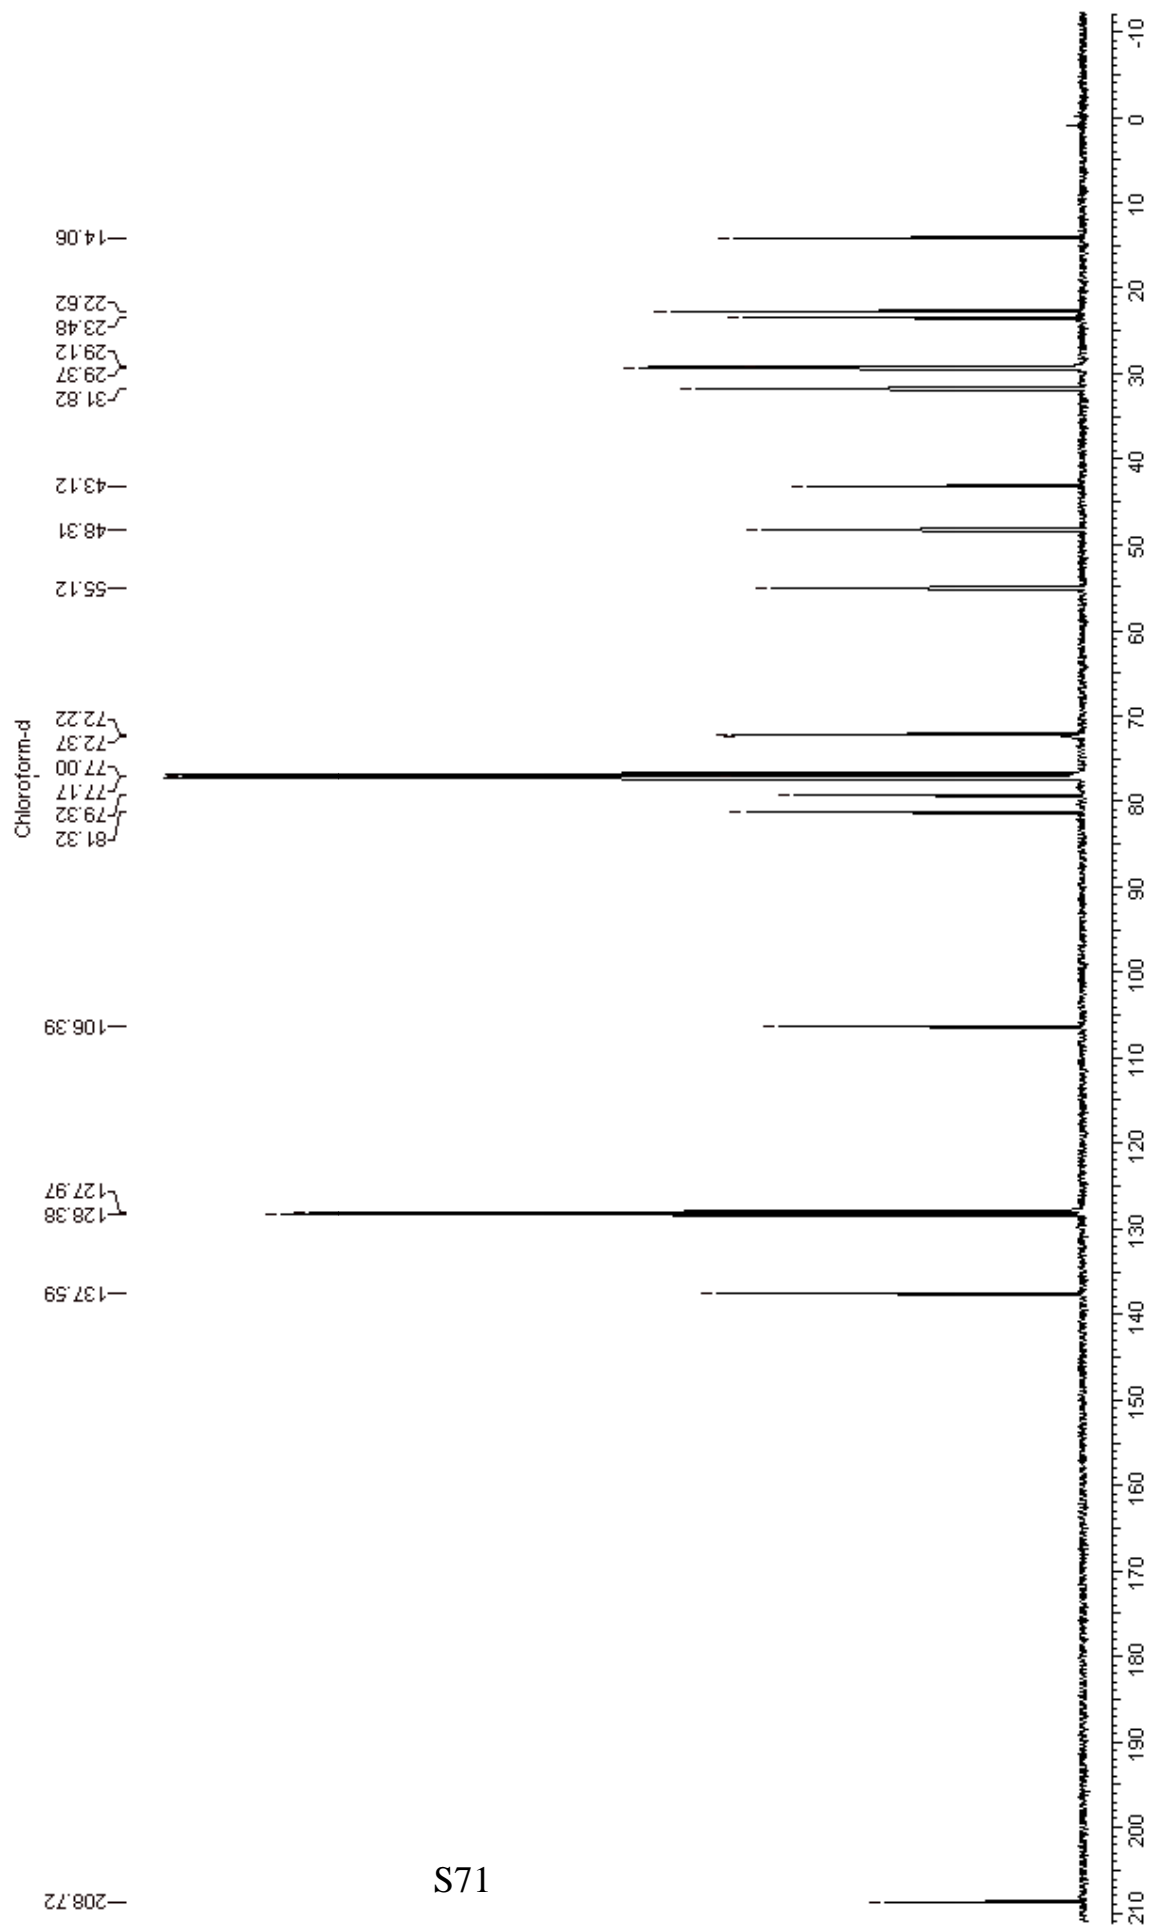

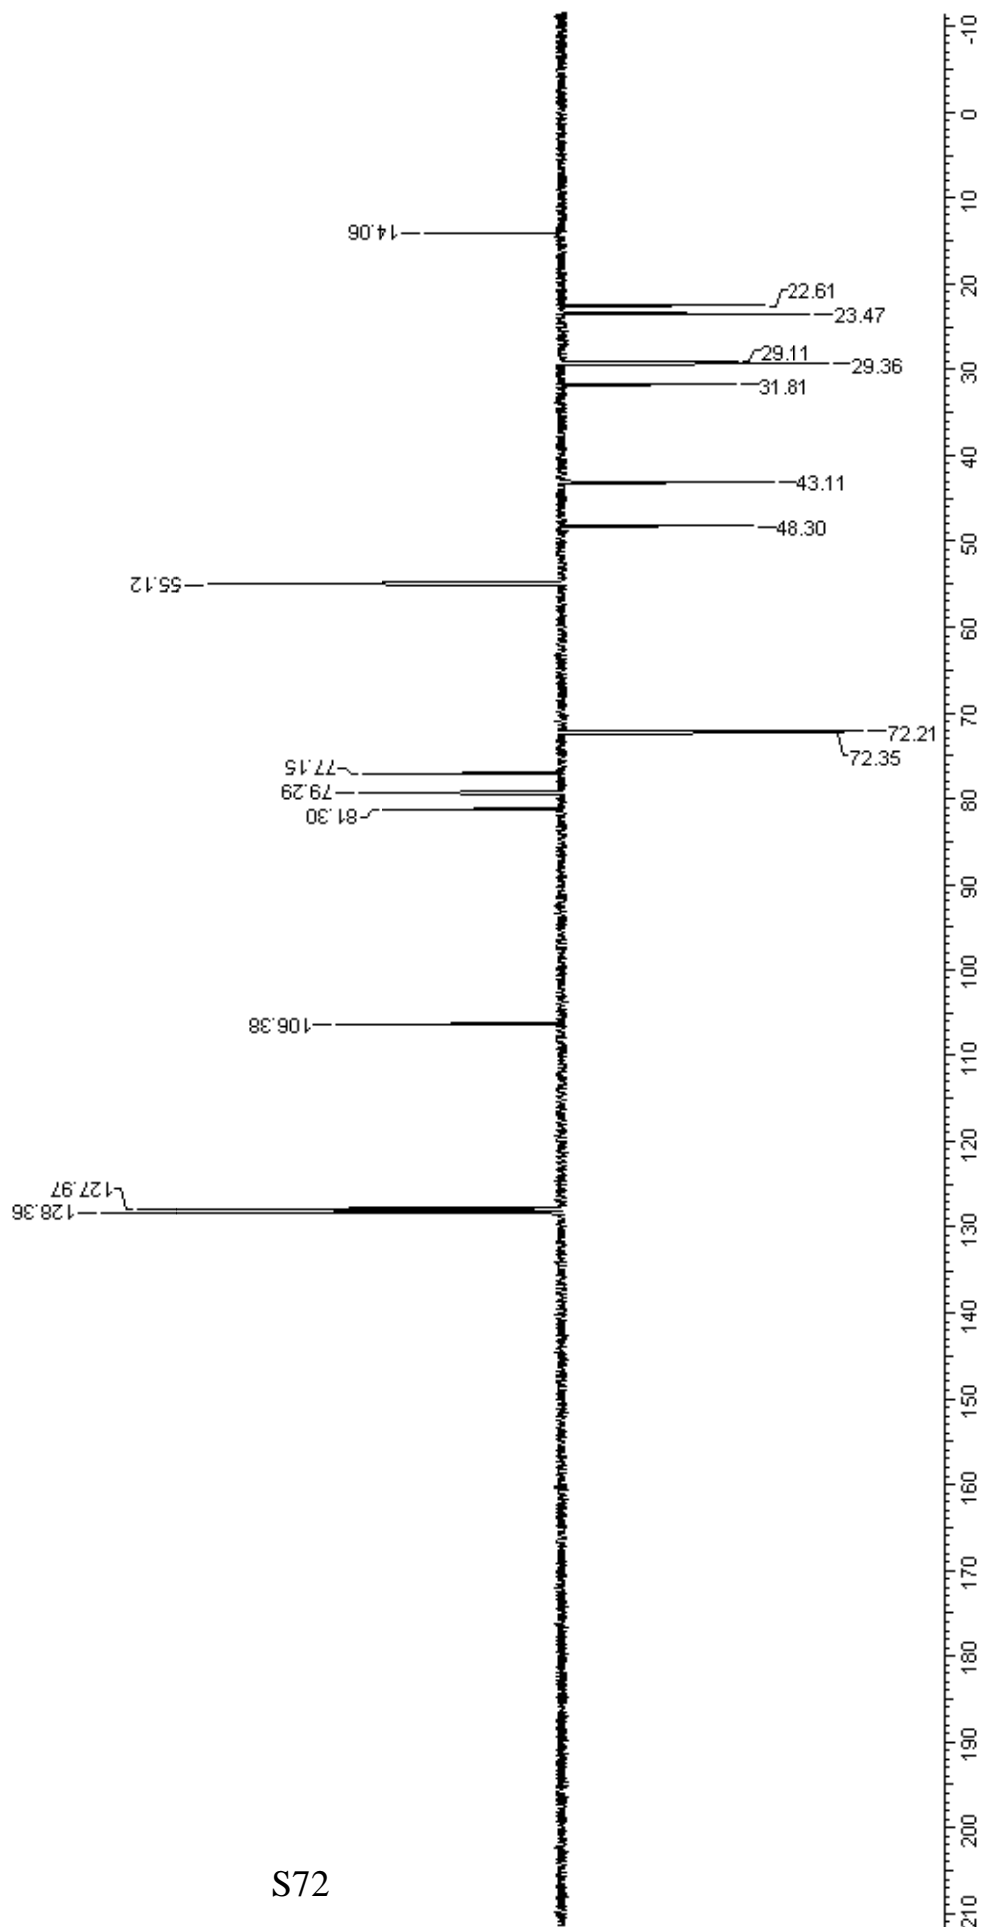



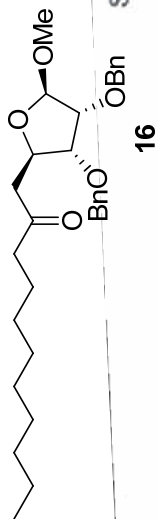

Spectrum Report

SN-495/14

Final - Shots 750 - IISER; Run #90; Label O9

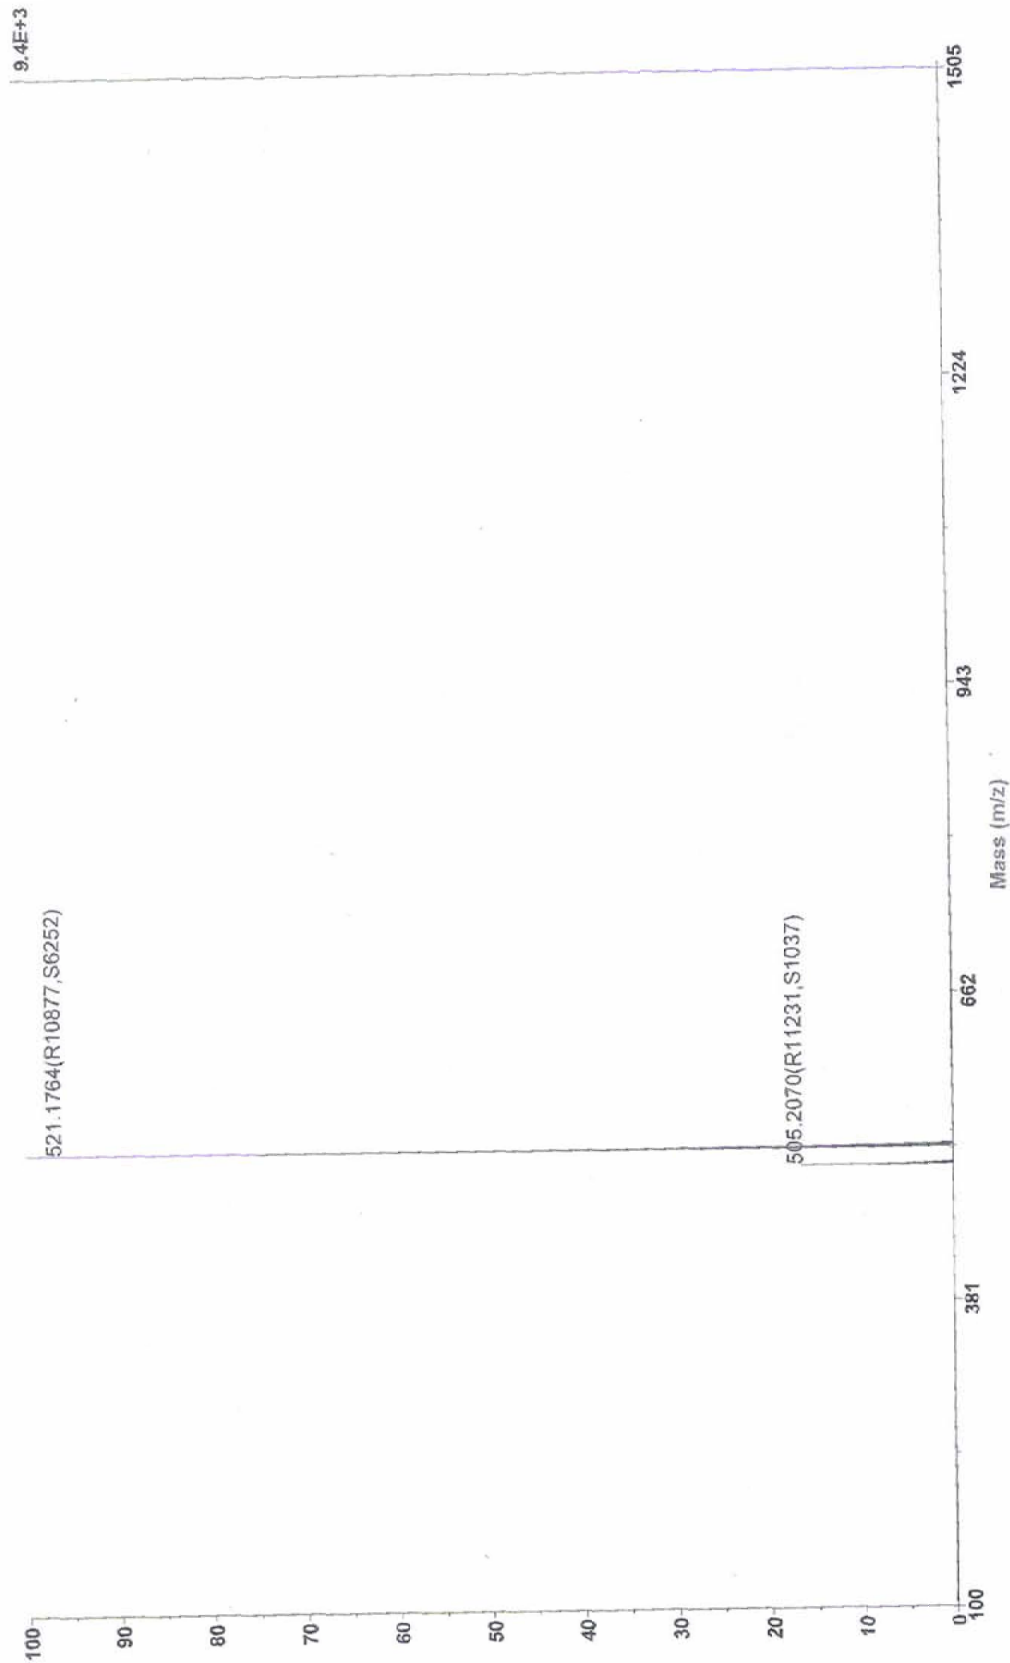

9/9/2010 3:37:15 PM

Page 1

mayurathiser Label O9 Run # 90

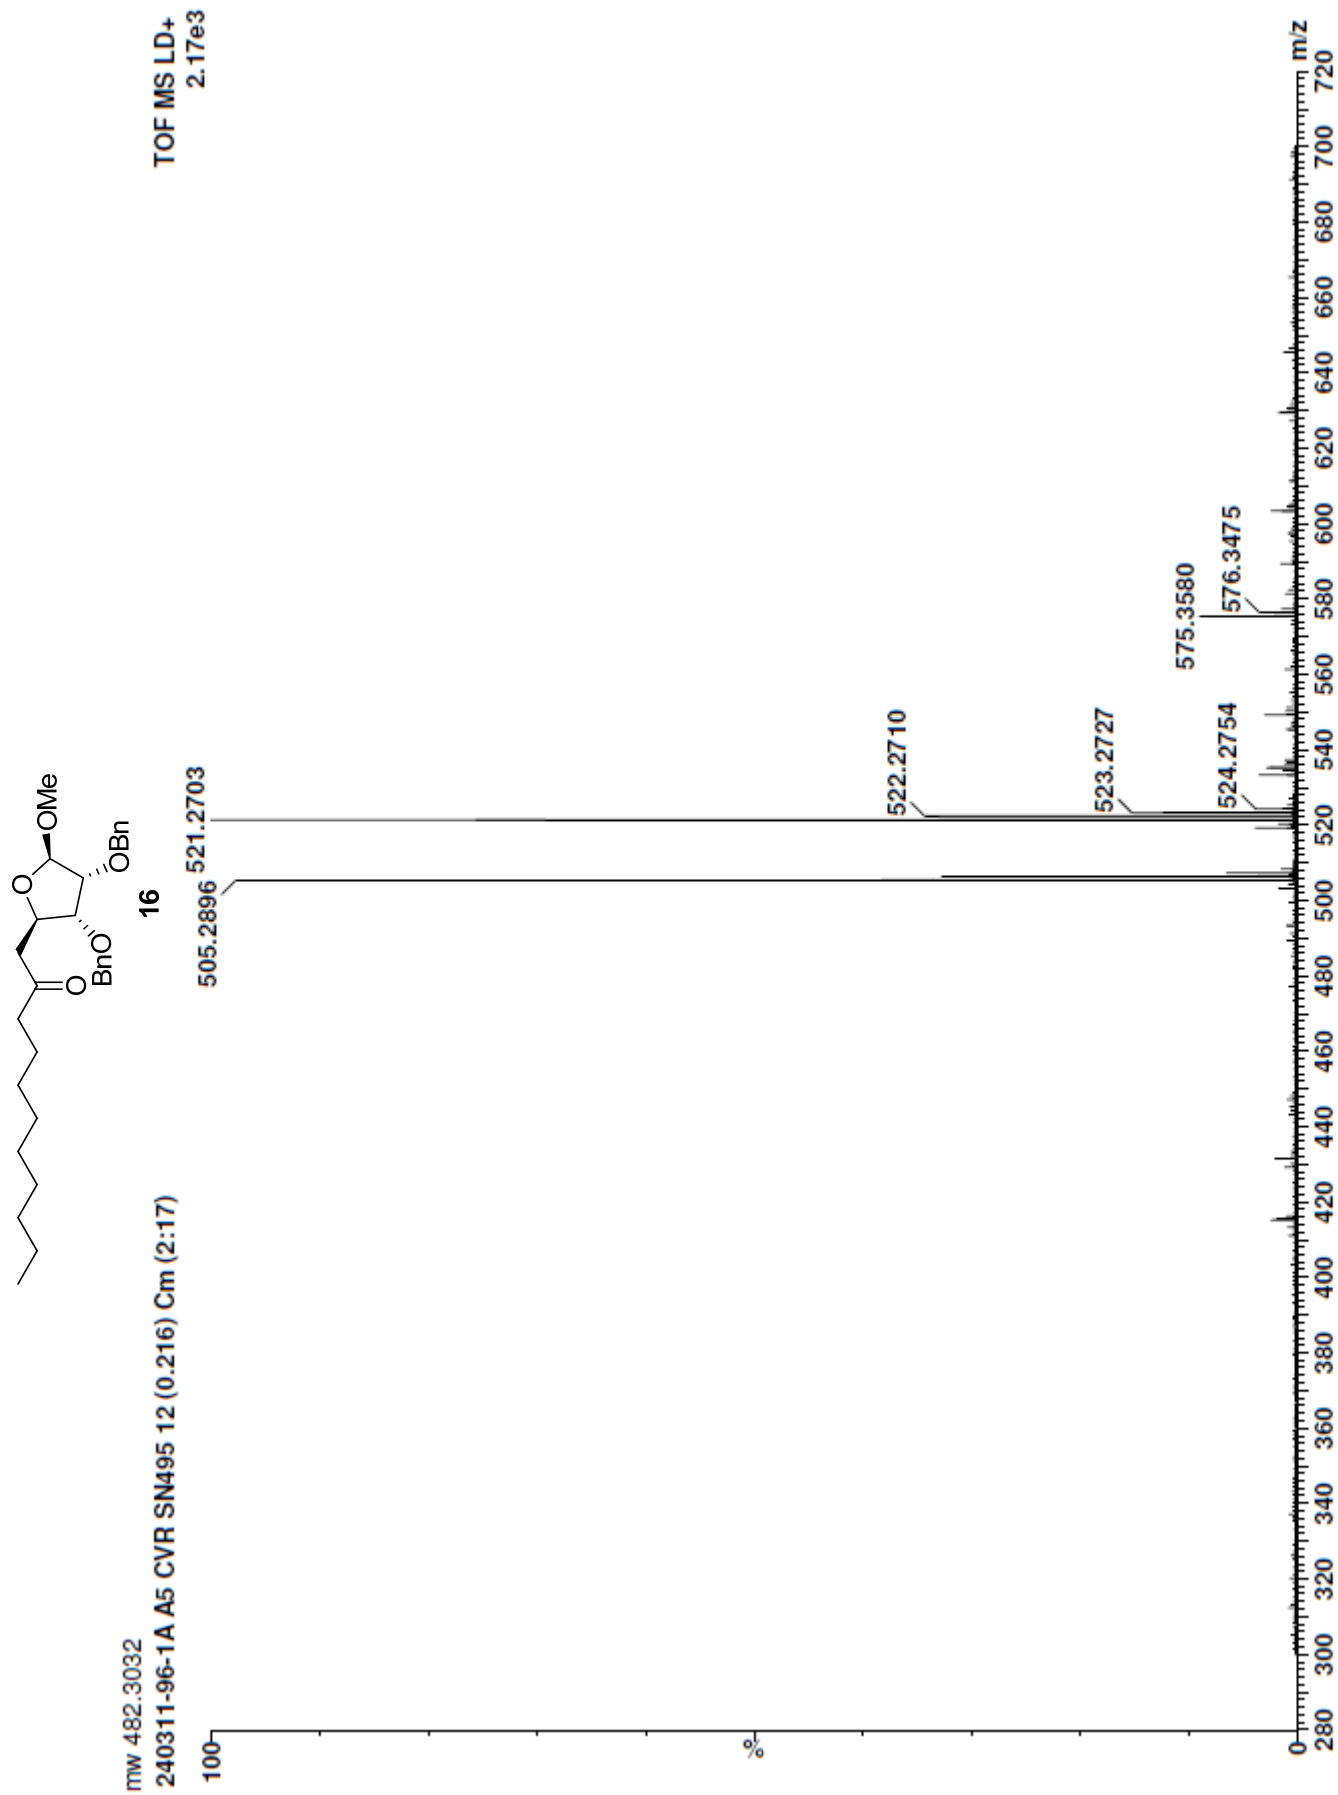

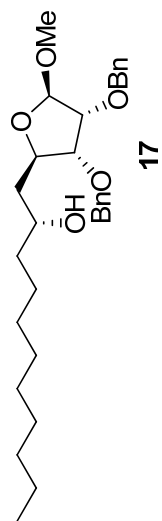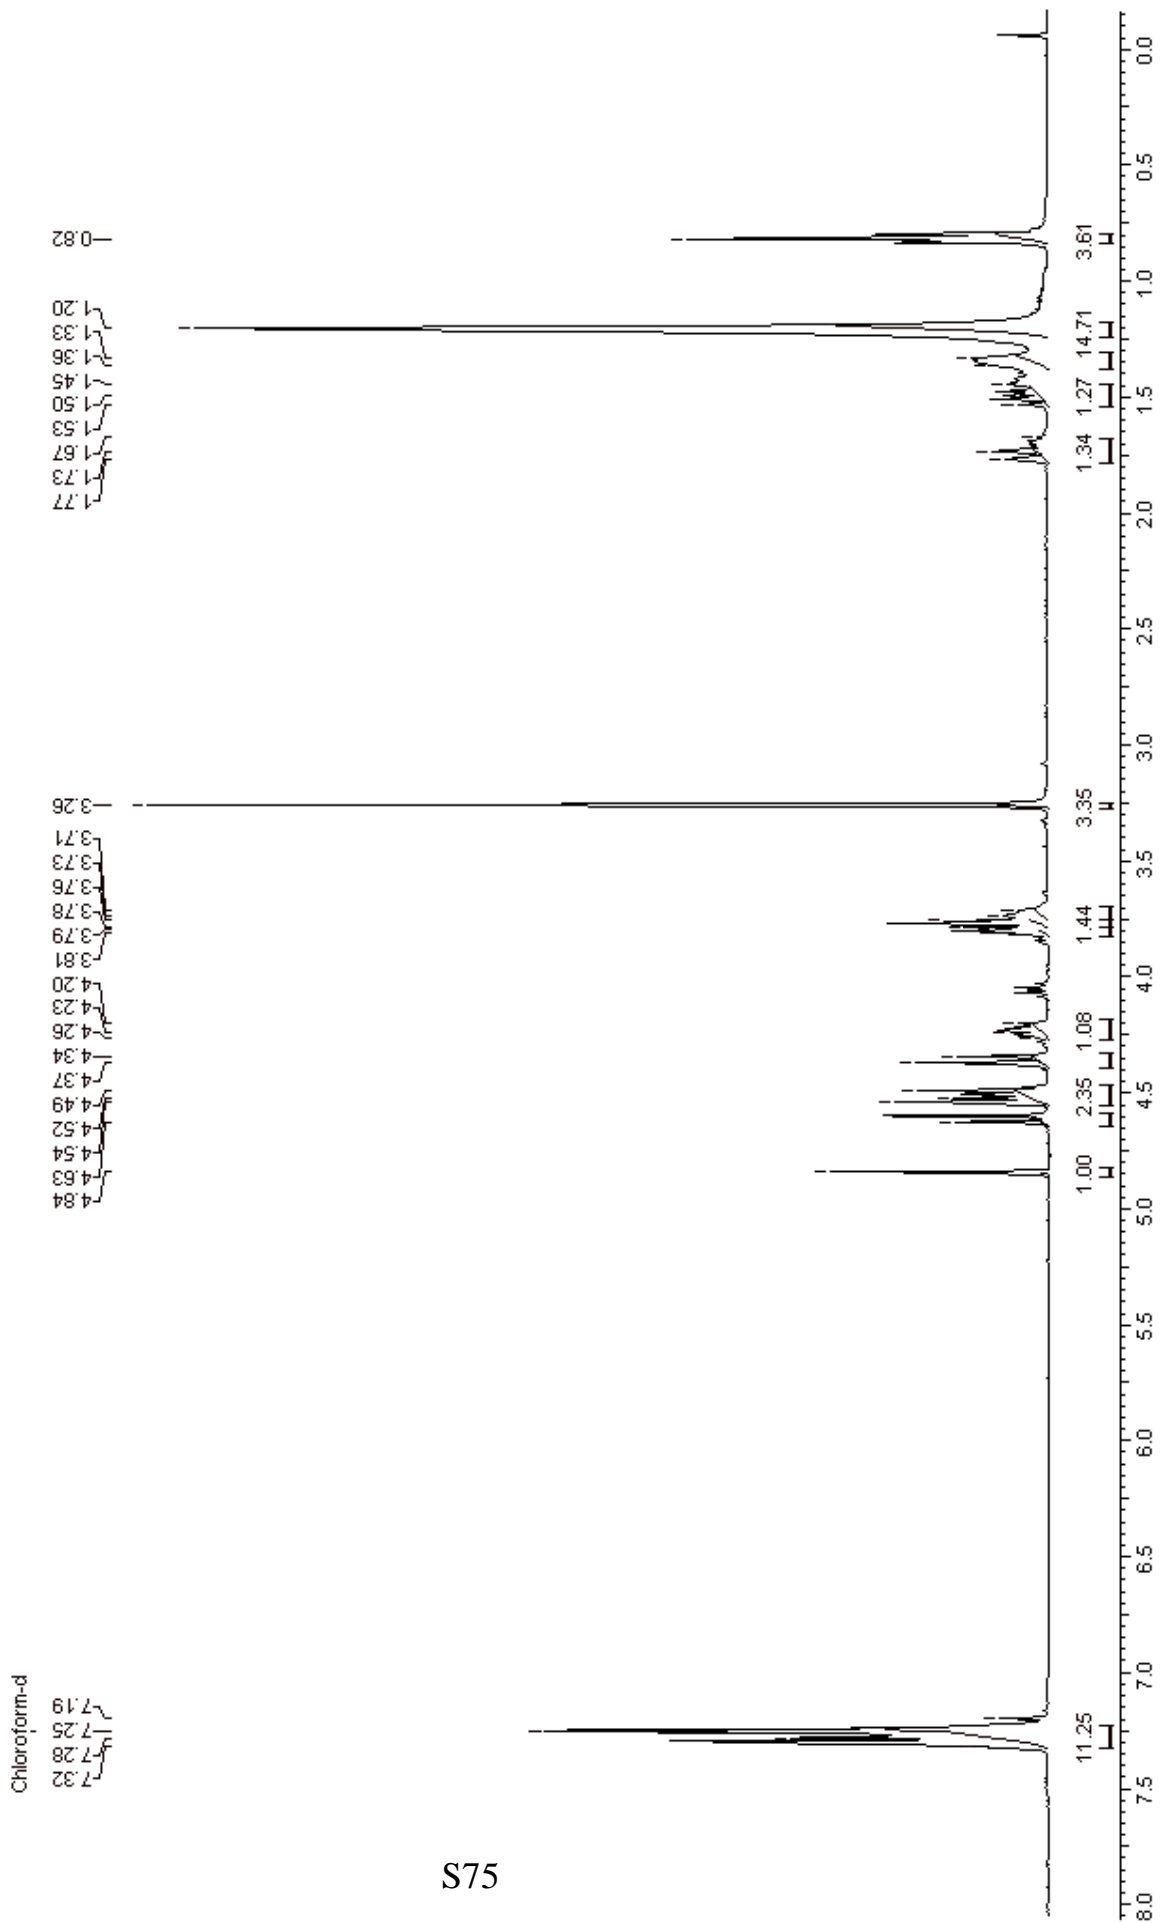

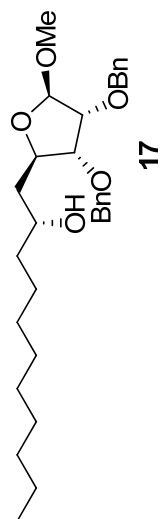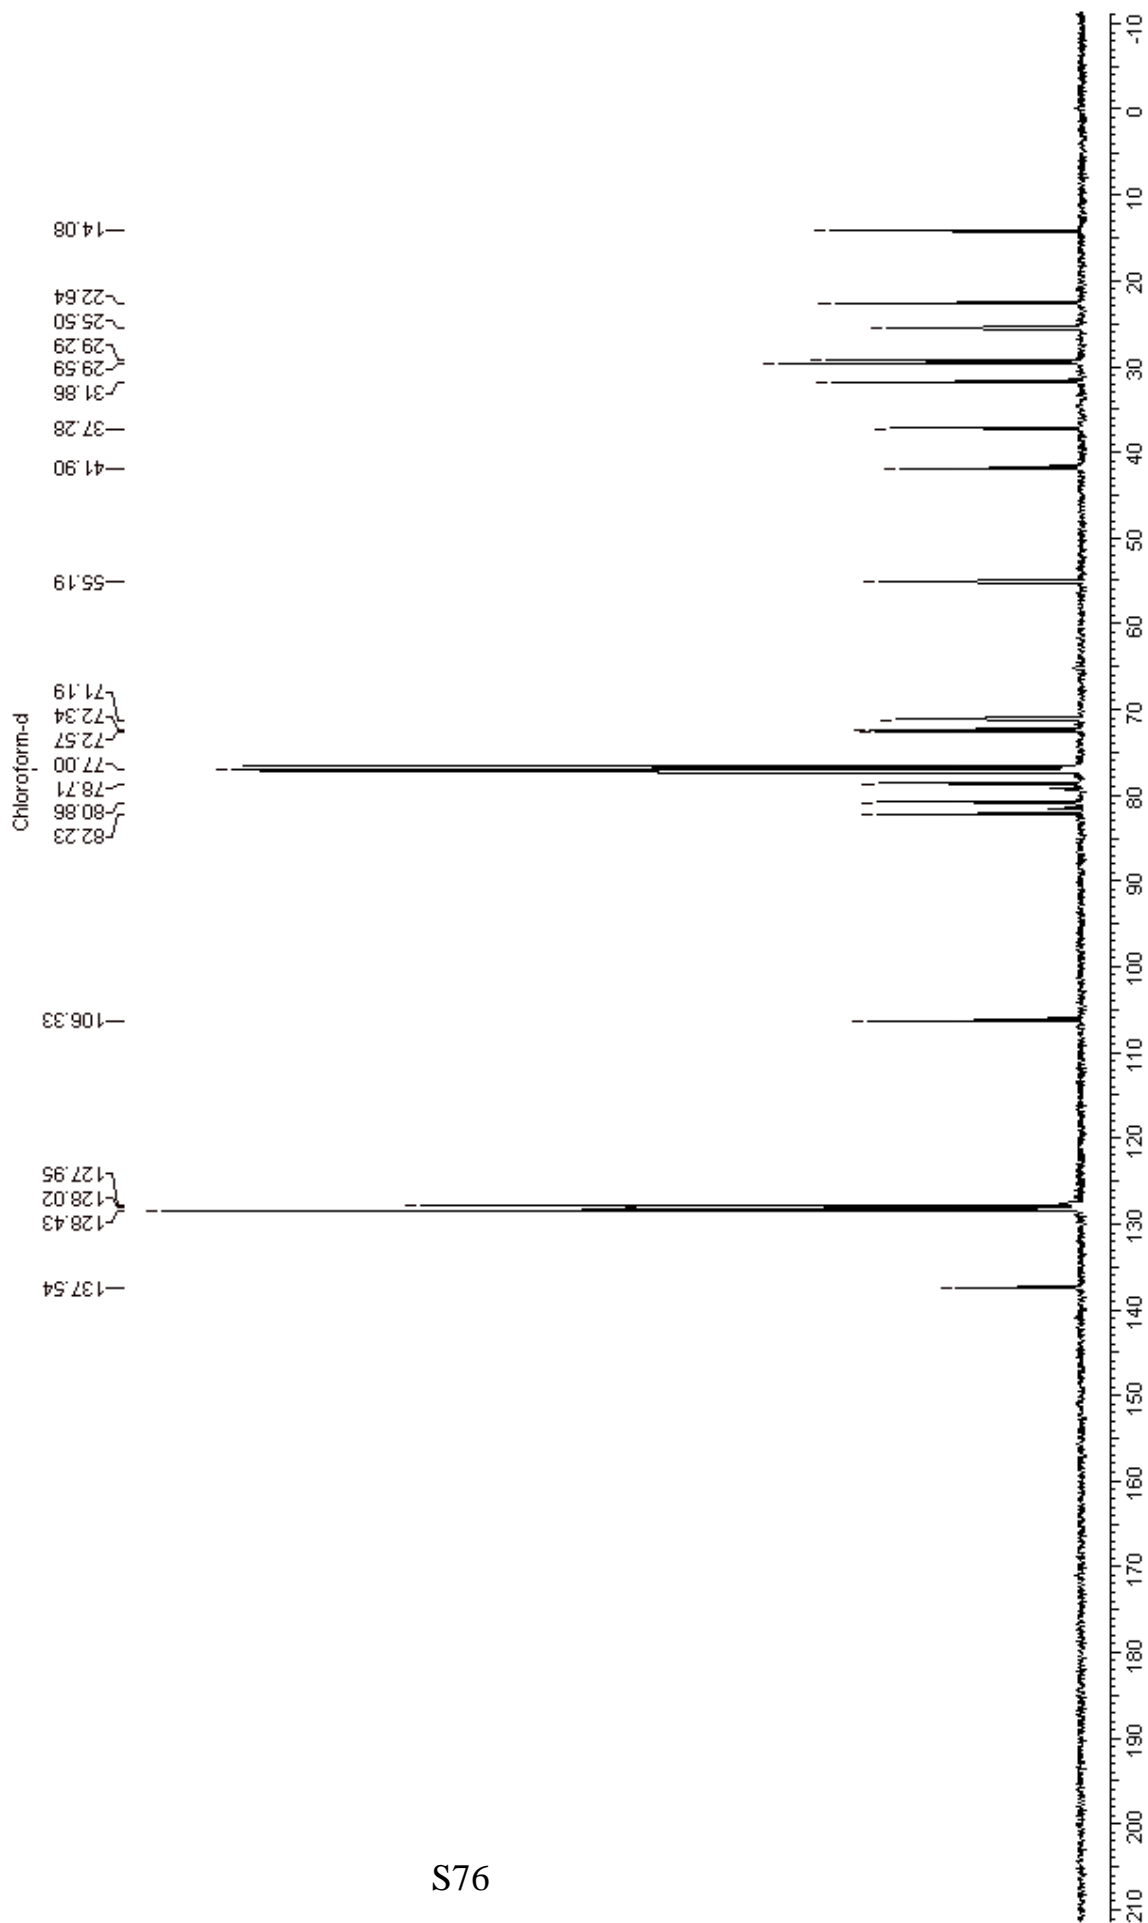

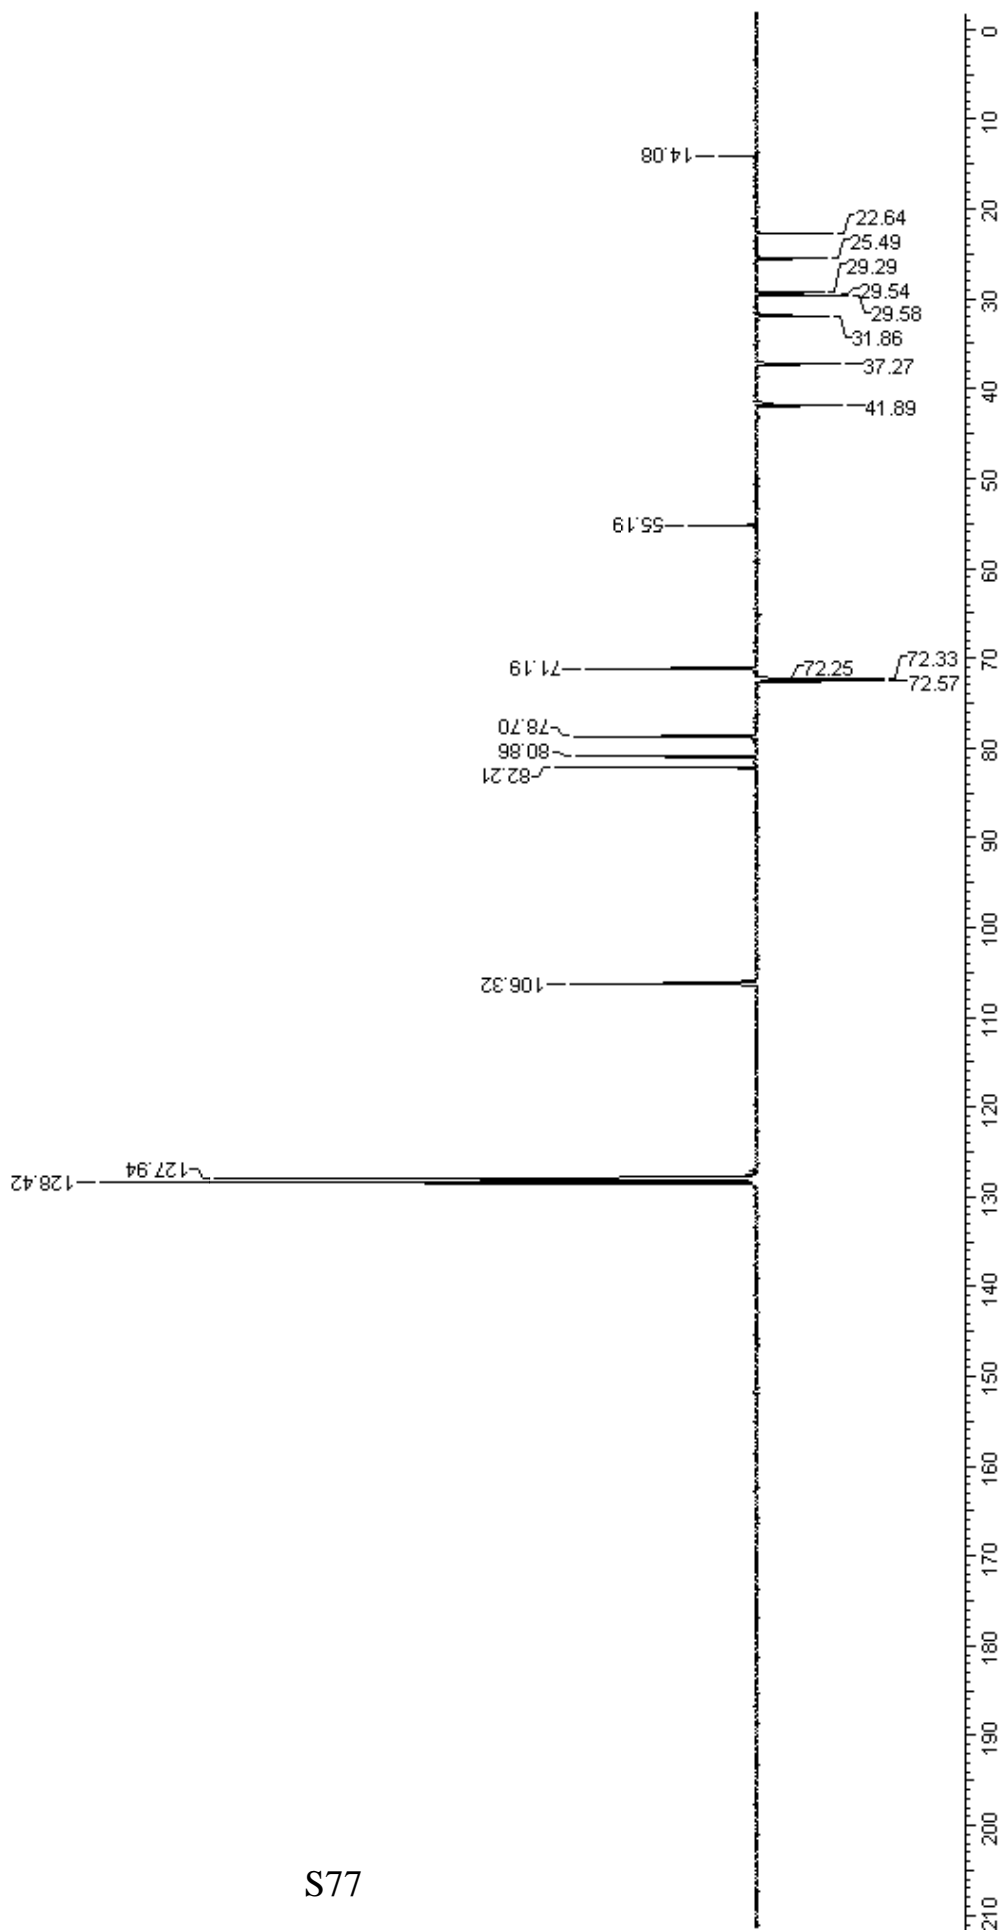

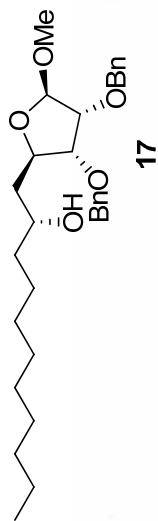

Spectrum Report

SN-497/15

Final - Shots 750 - IISER; Run #90; Label O6

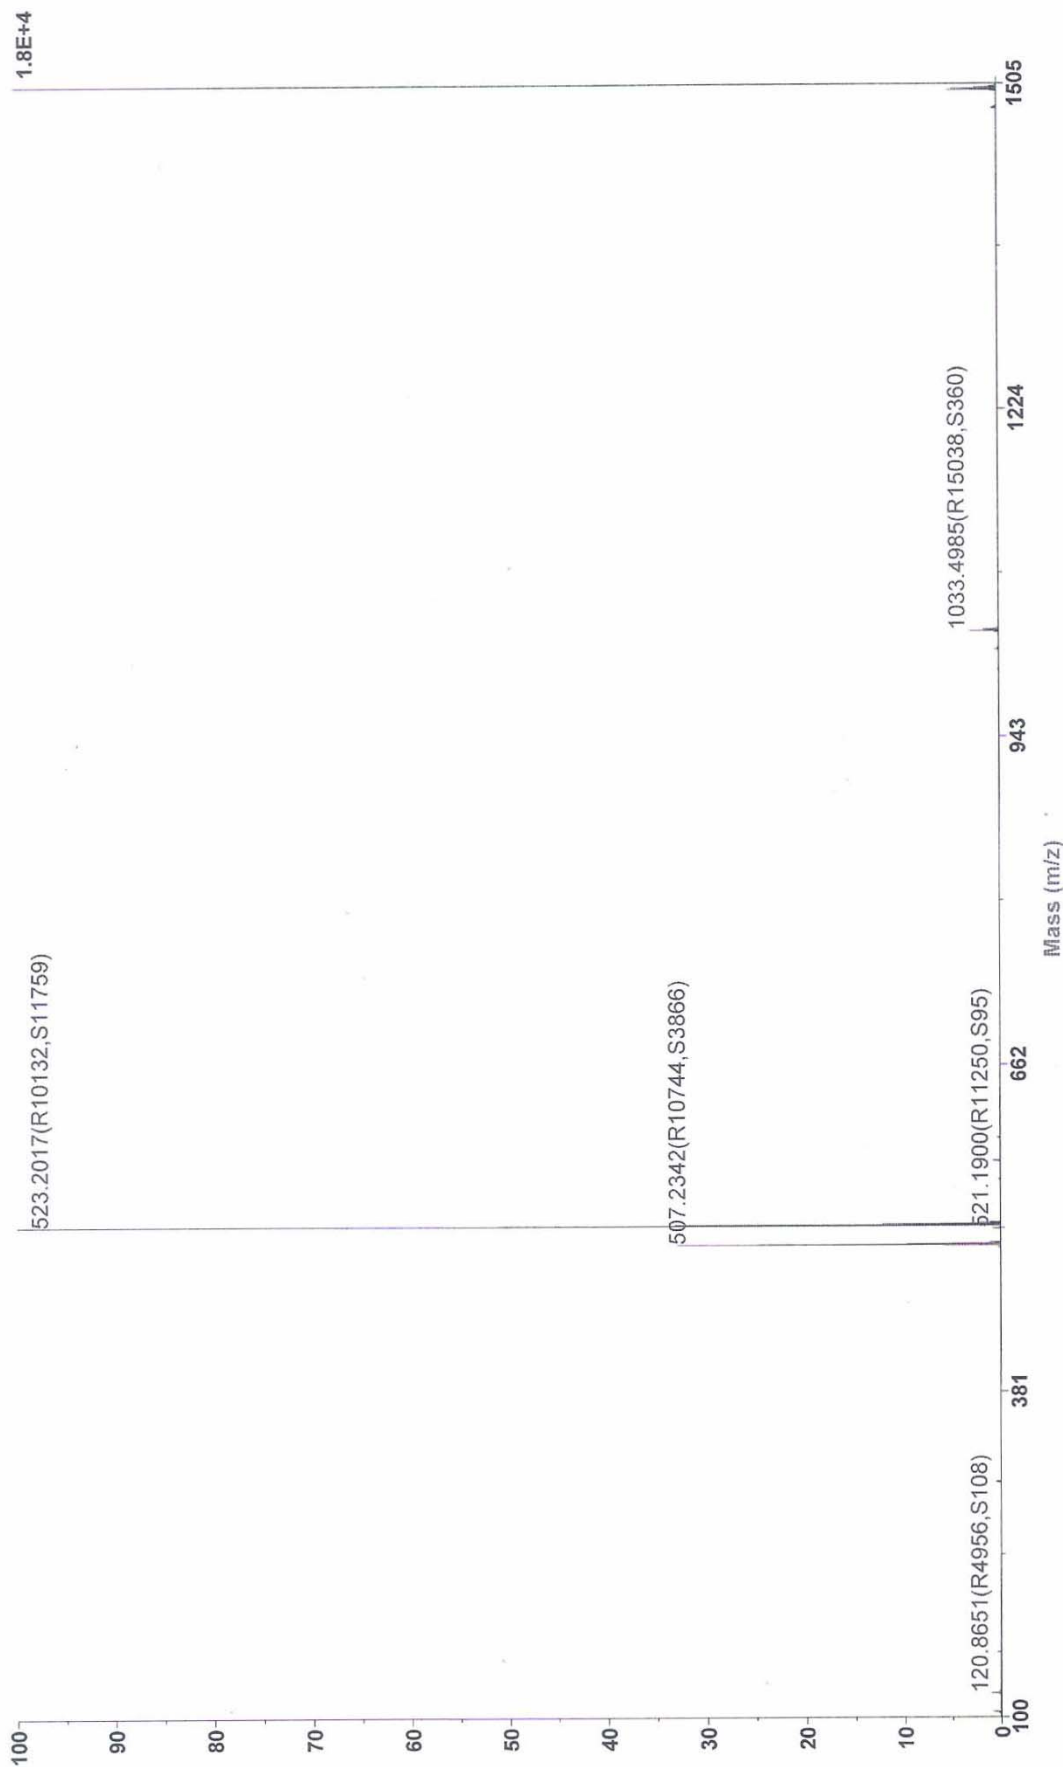

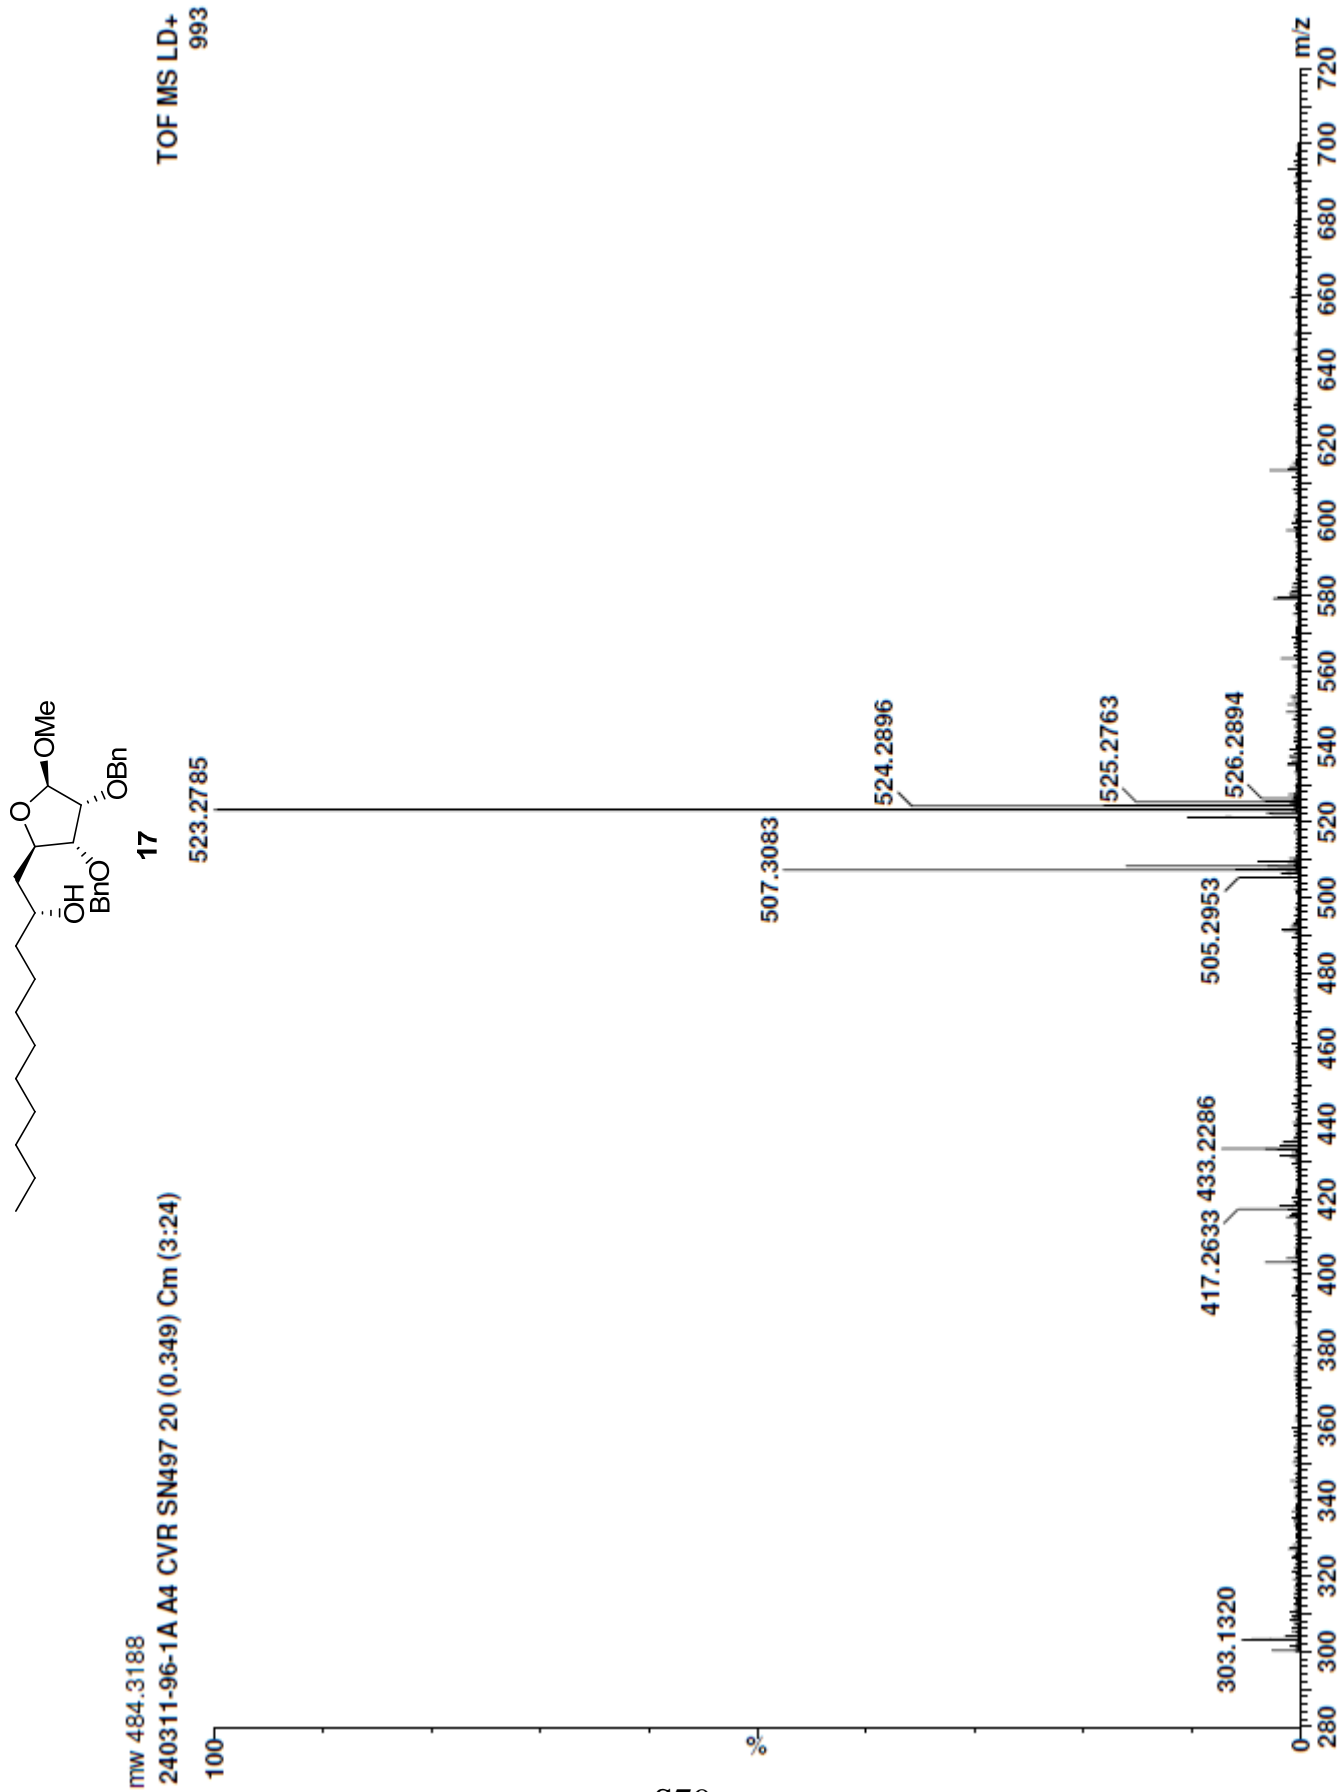

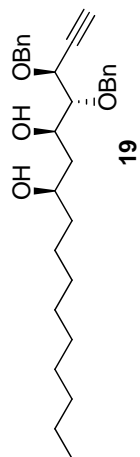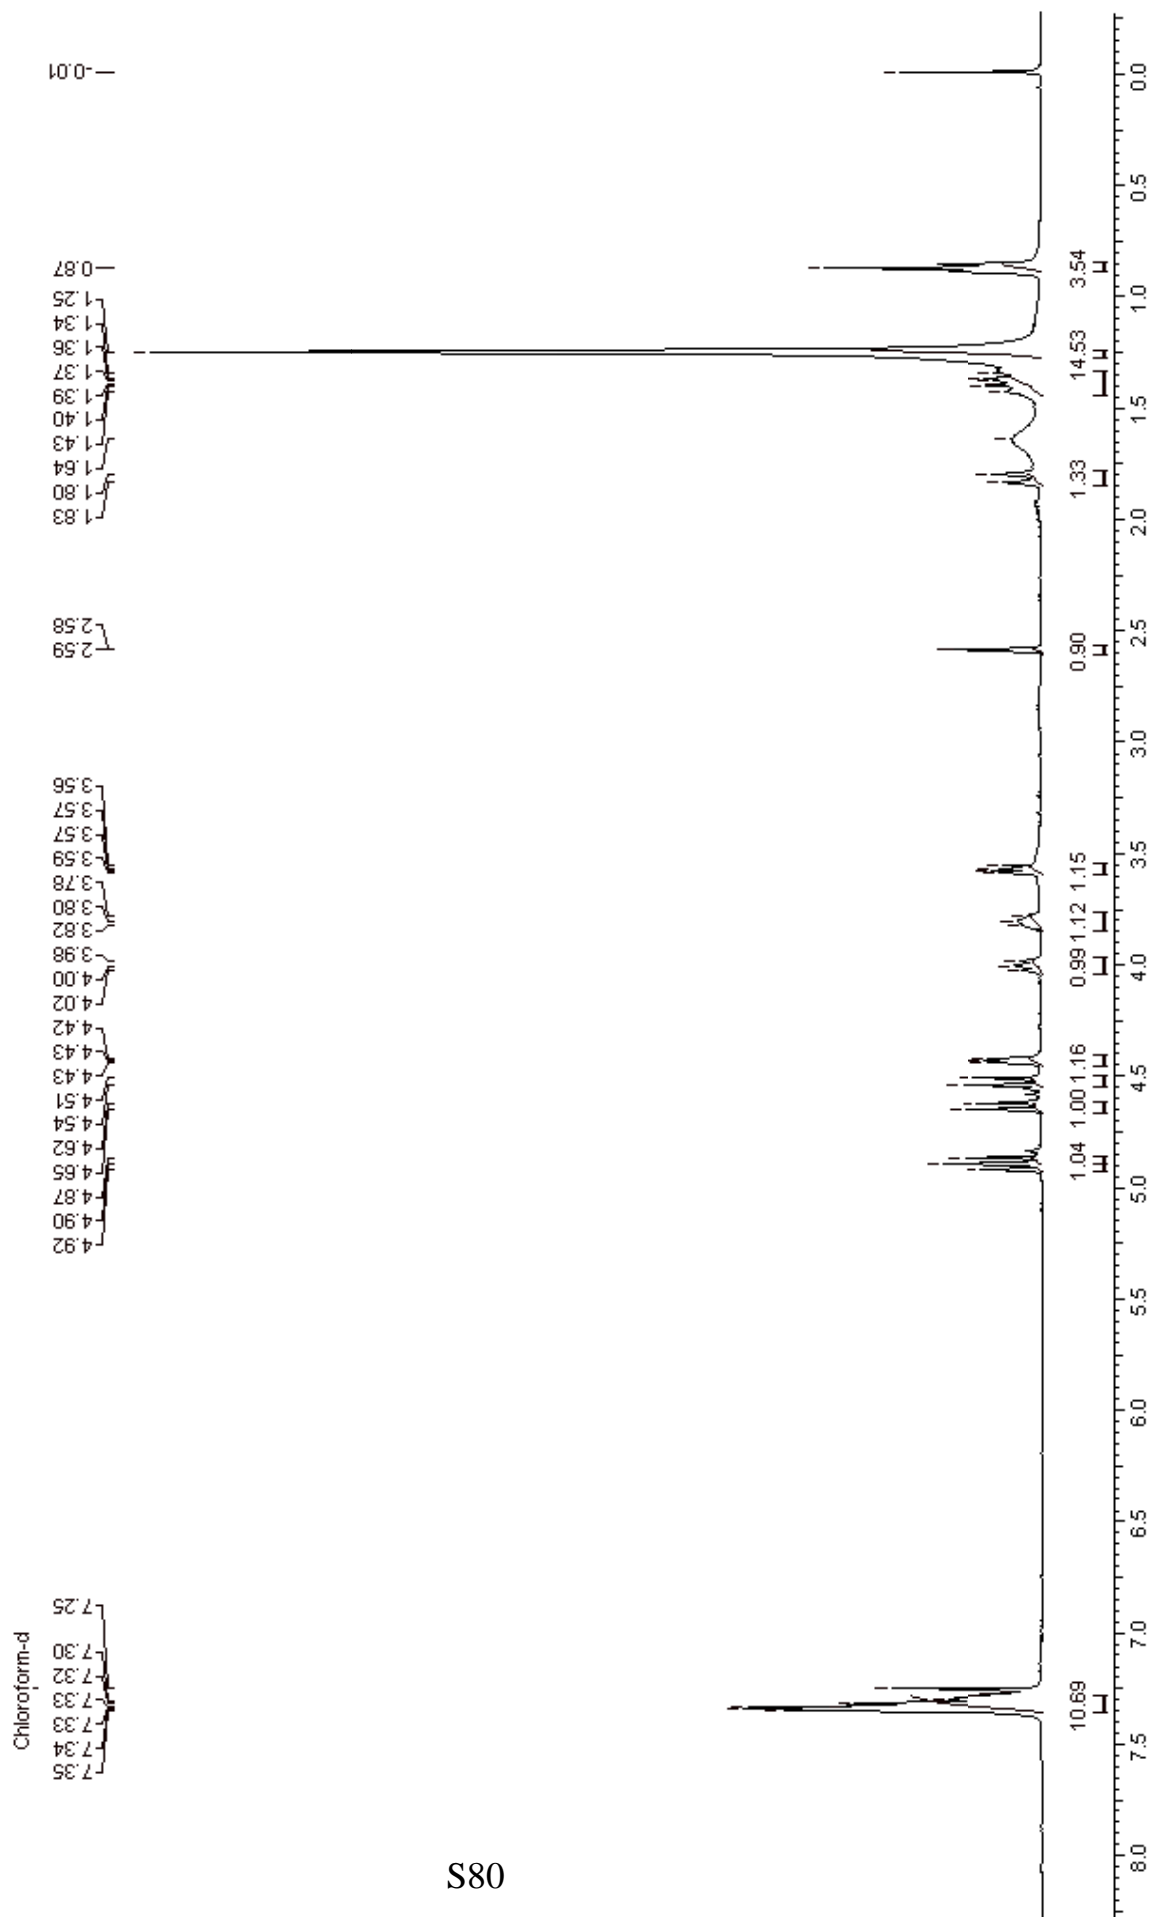



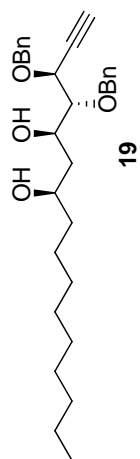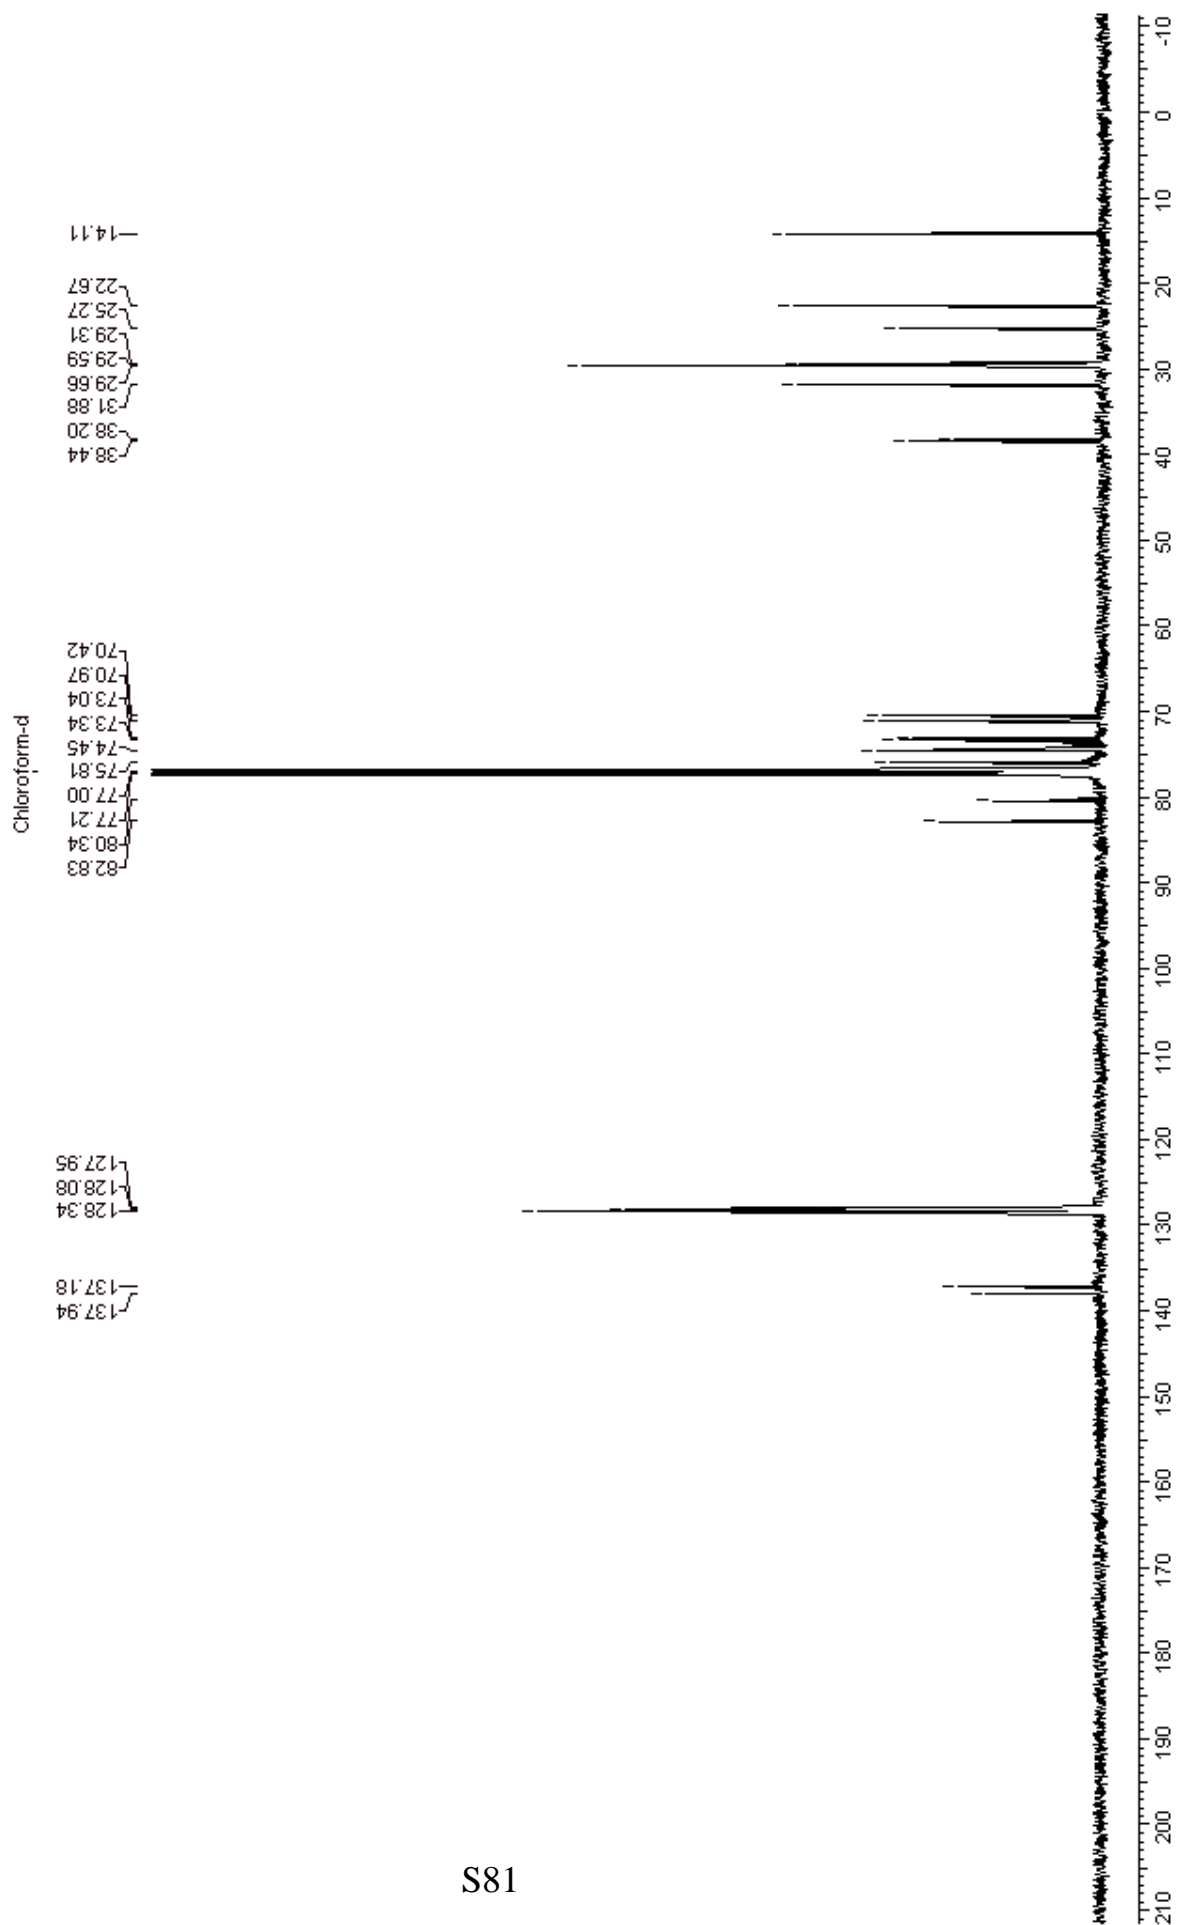

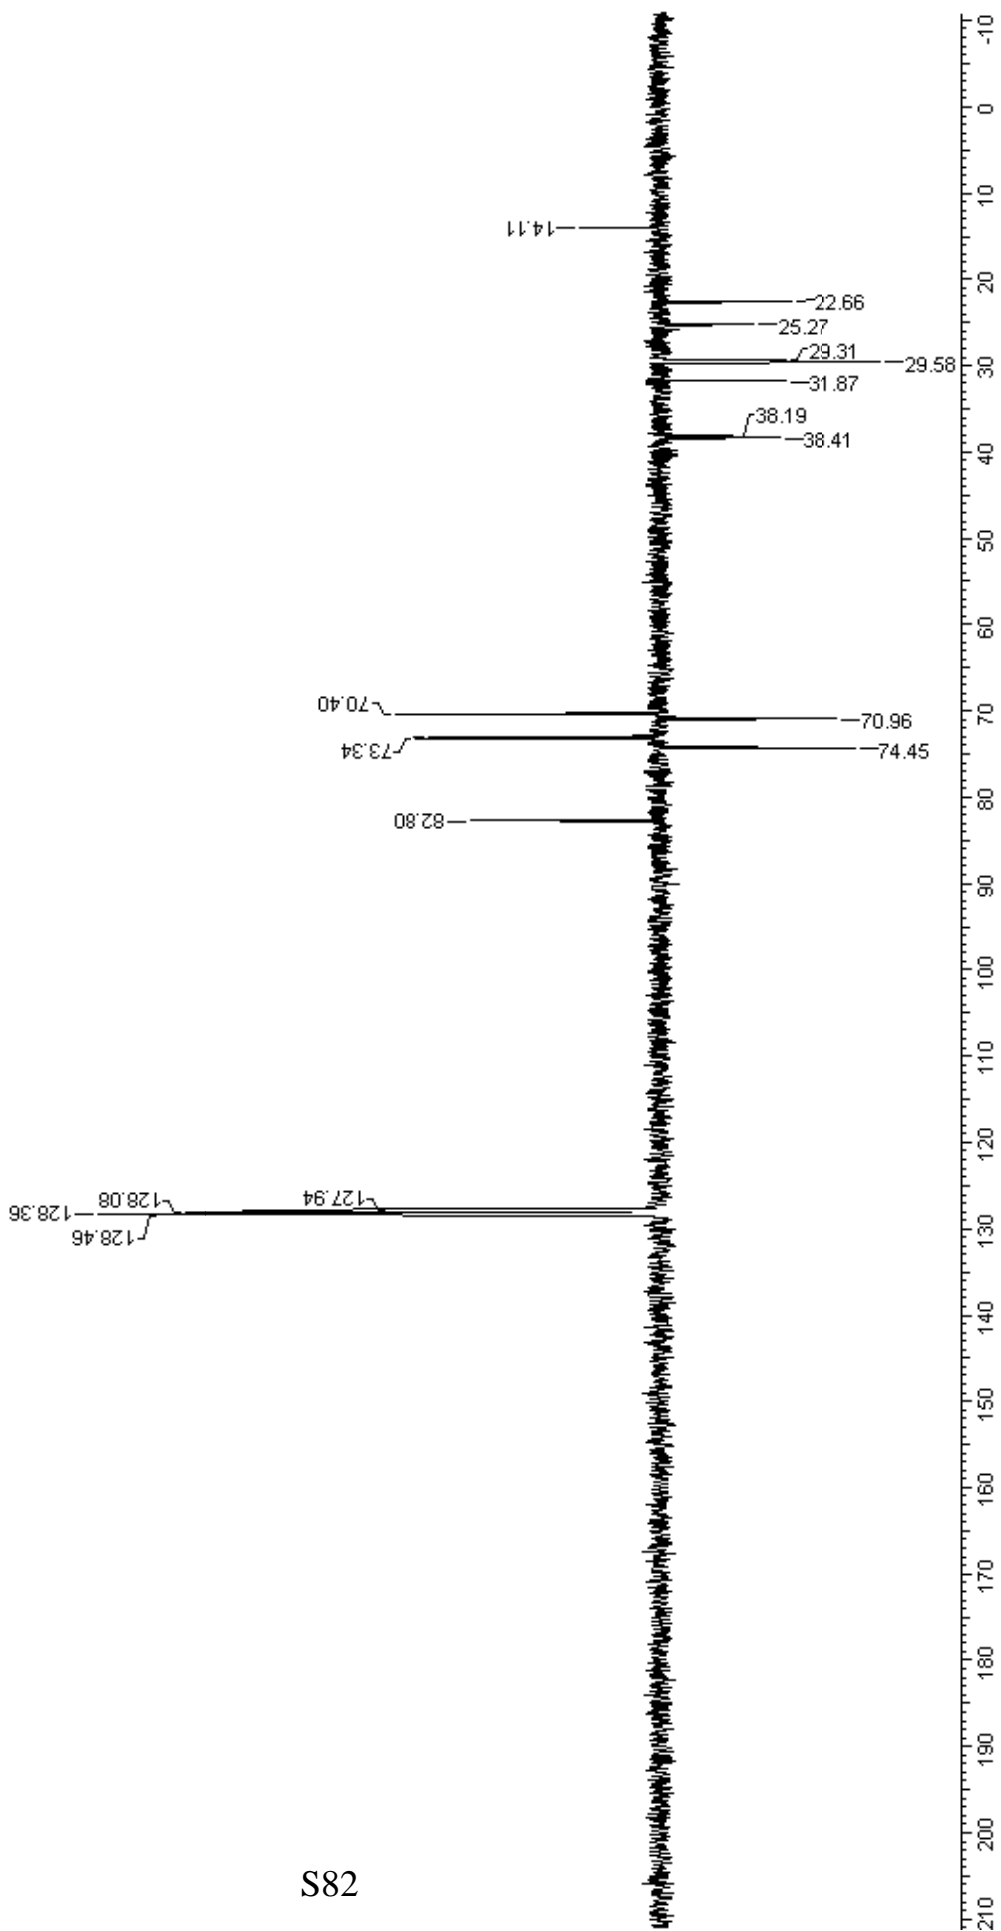

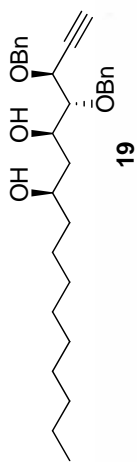

### Spectrum Report

SN-499 / 16

Final - Shots 750 - IISER; Run #90; Label O11

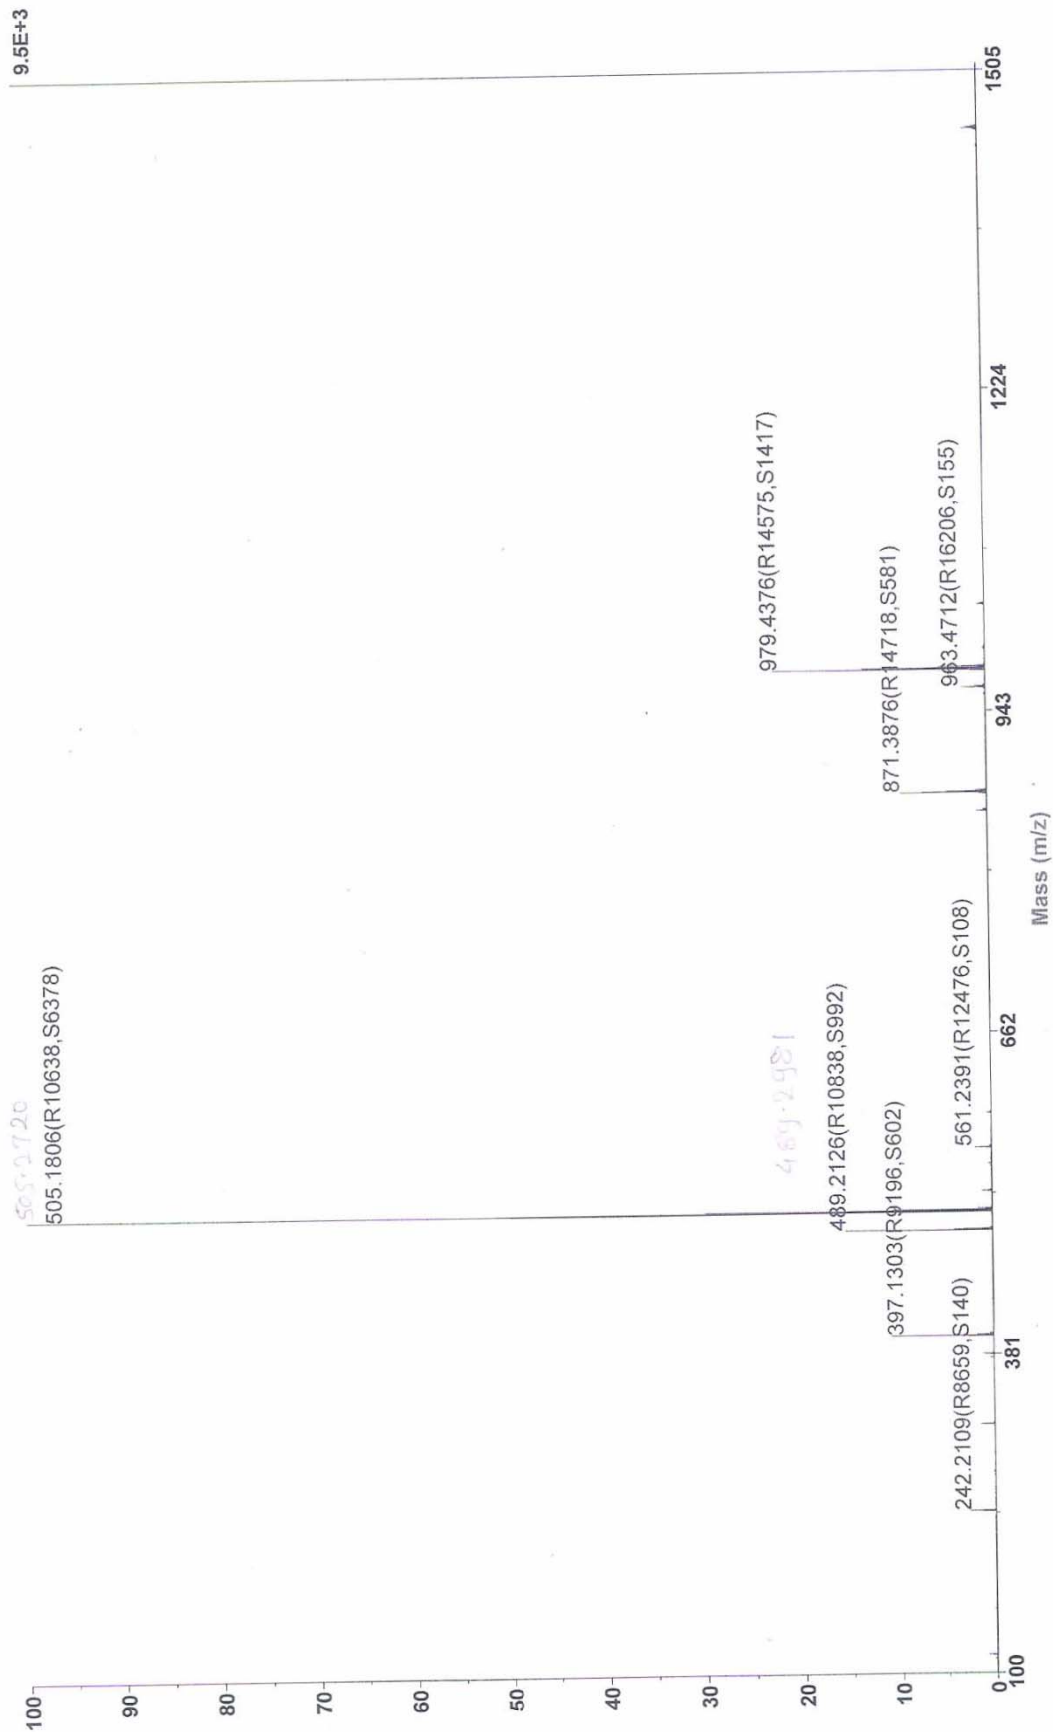

9/9/2010 3:37:42 PM

Page 1

mayura\IISER Label O11 Run # 90

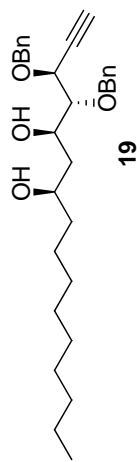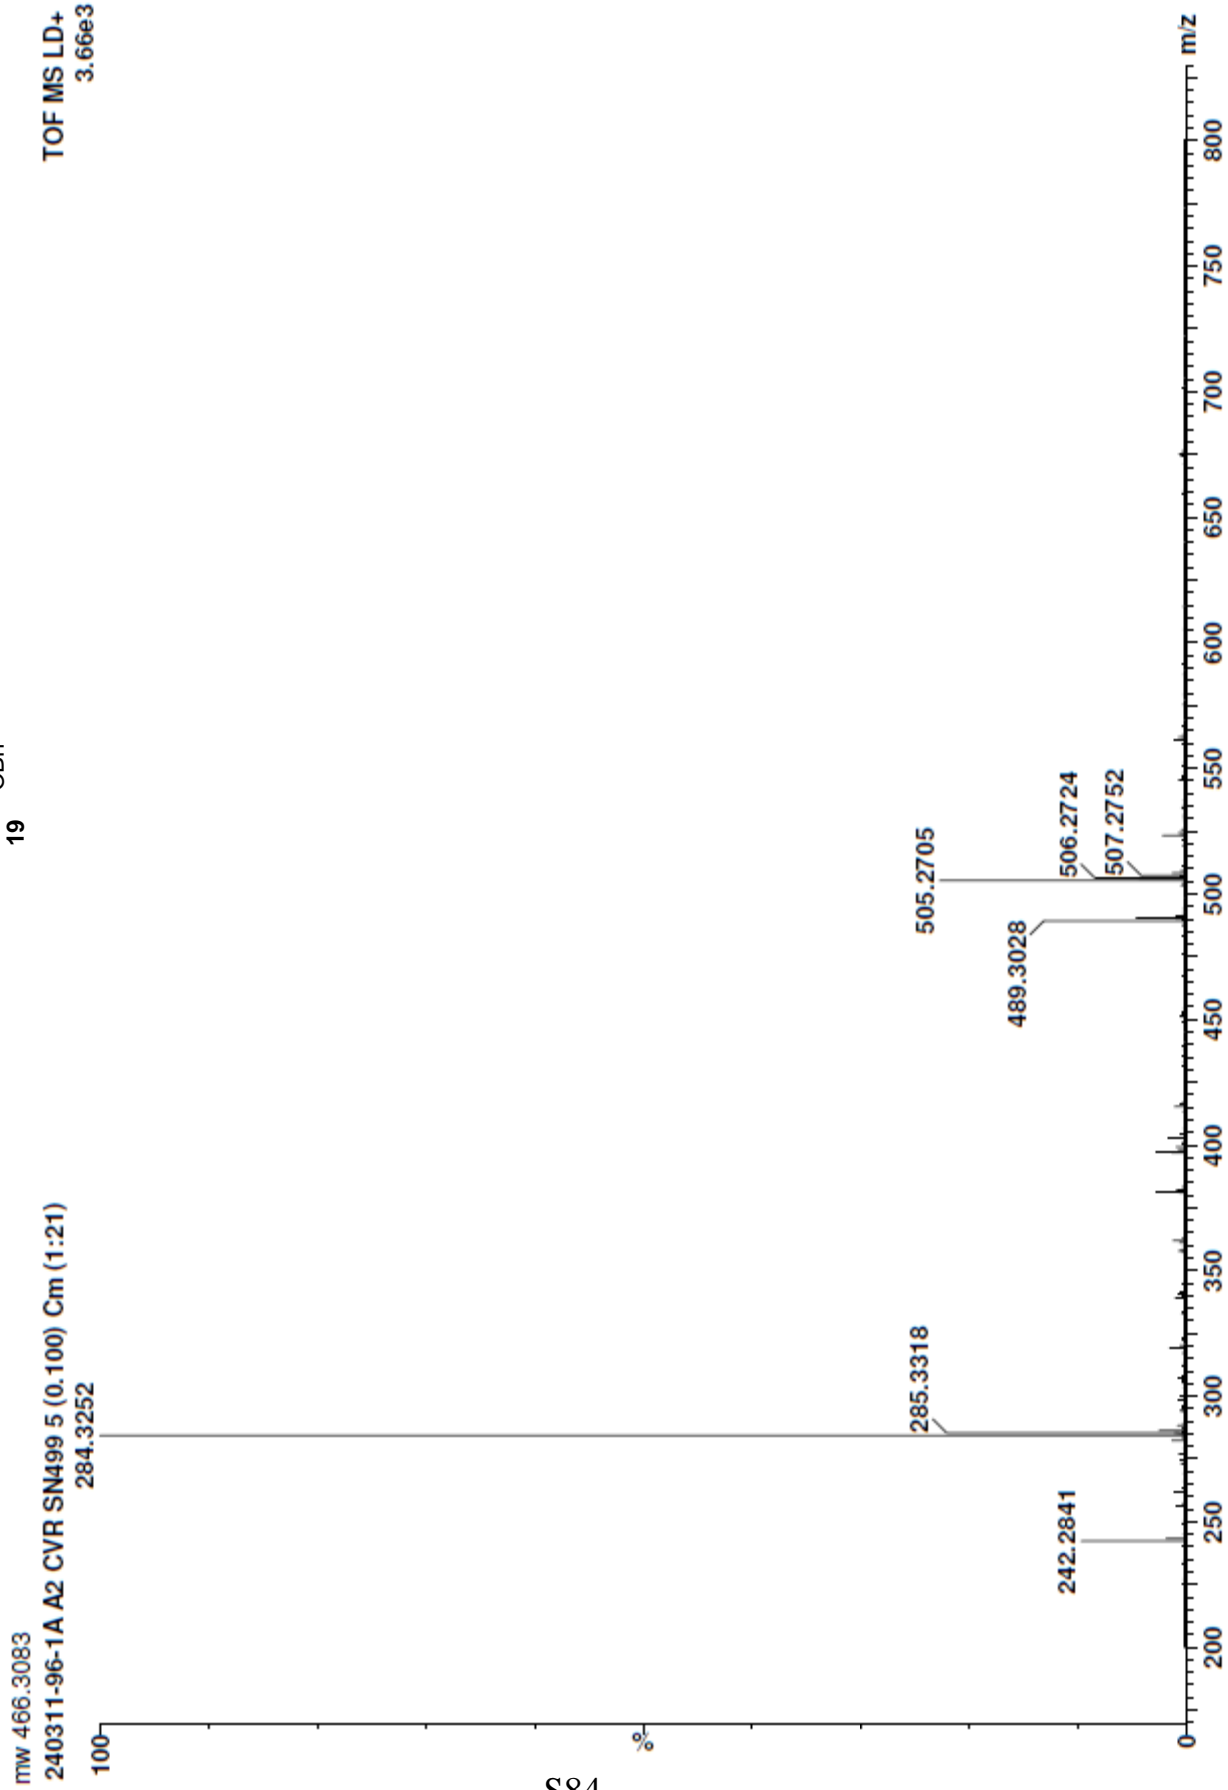

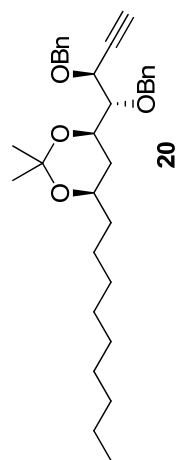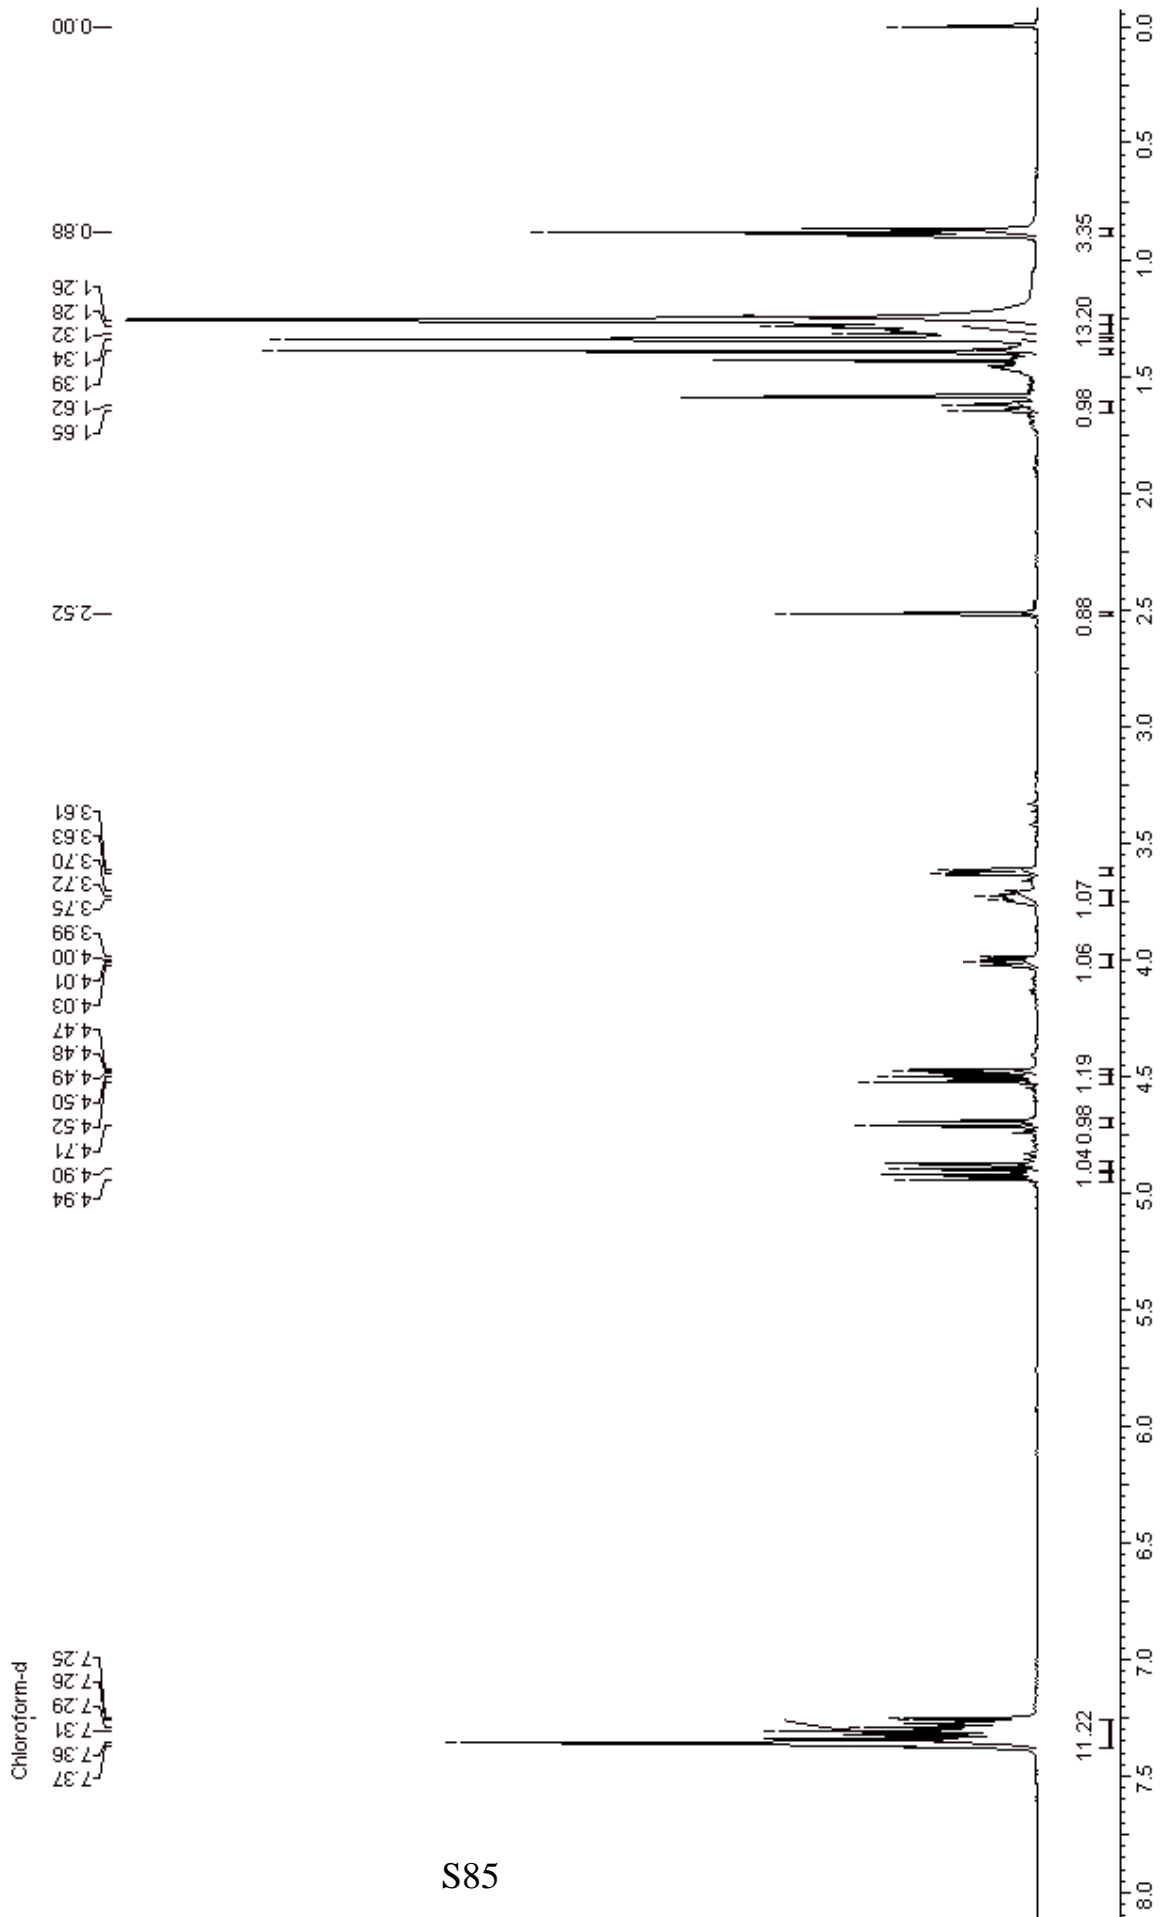

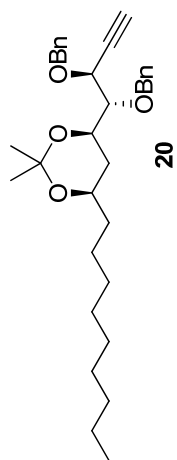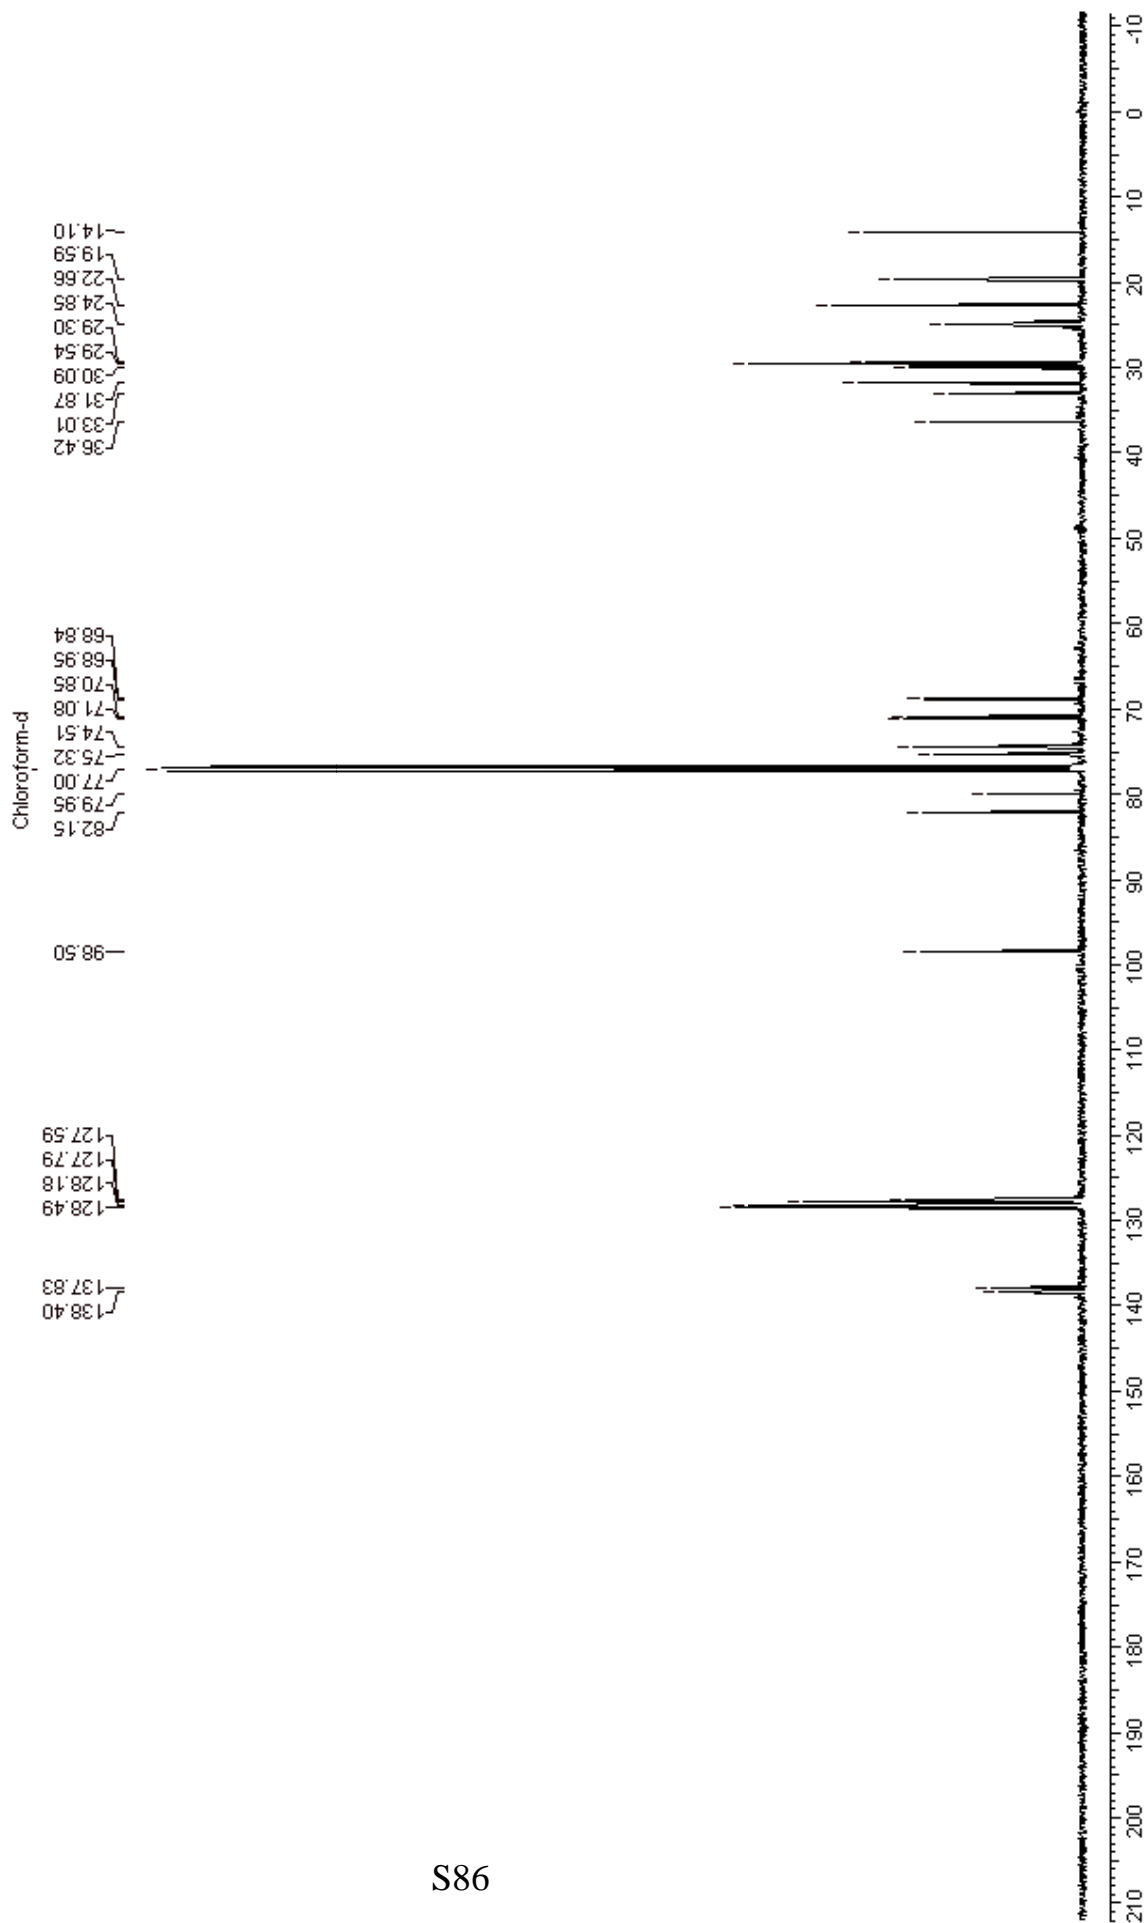

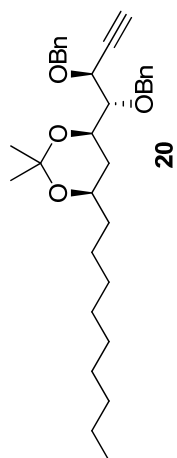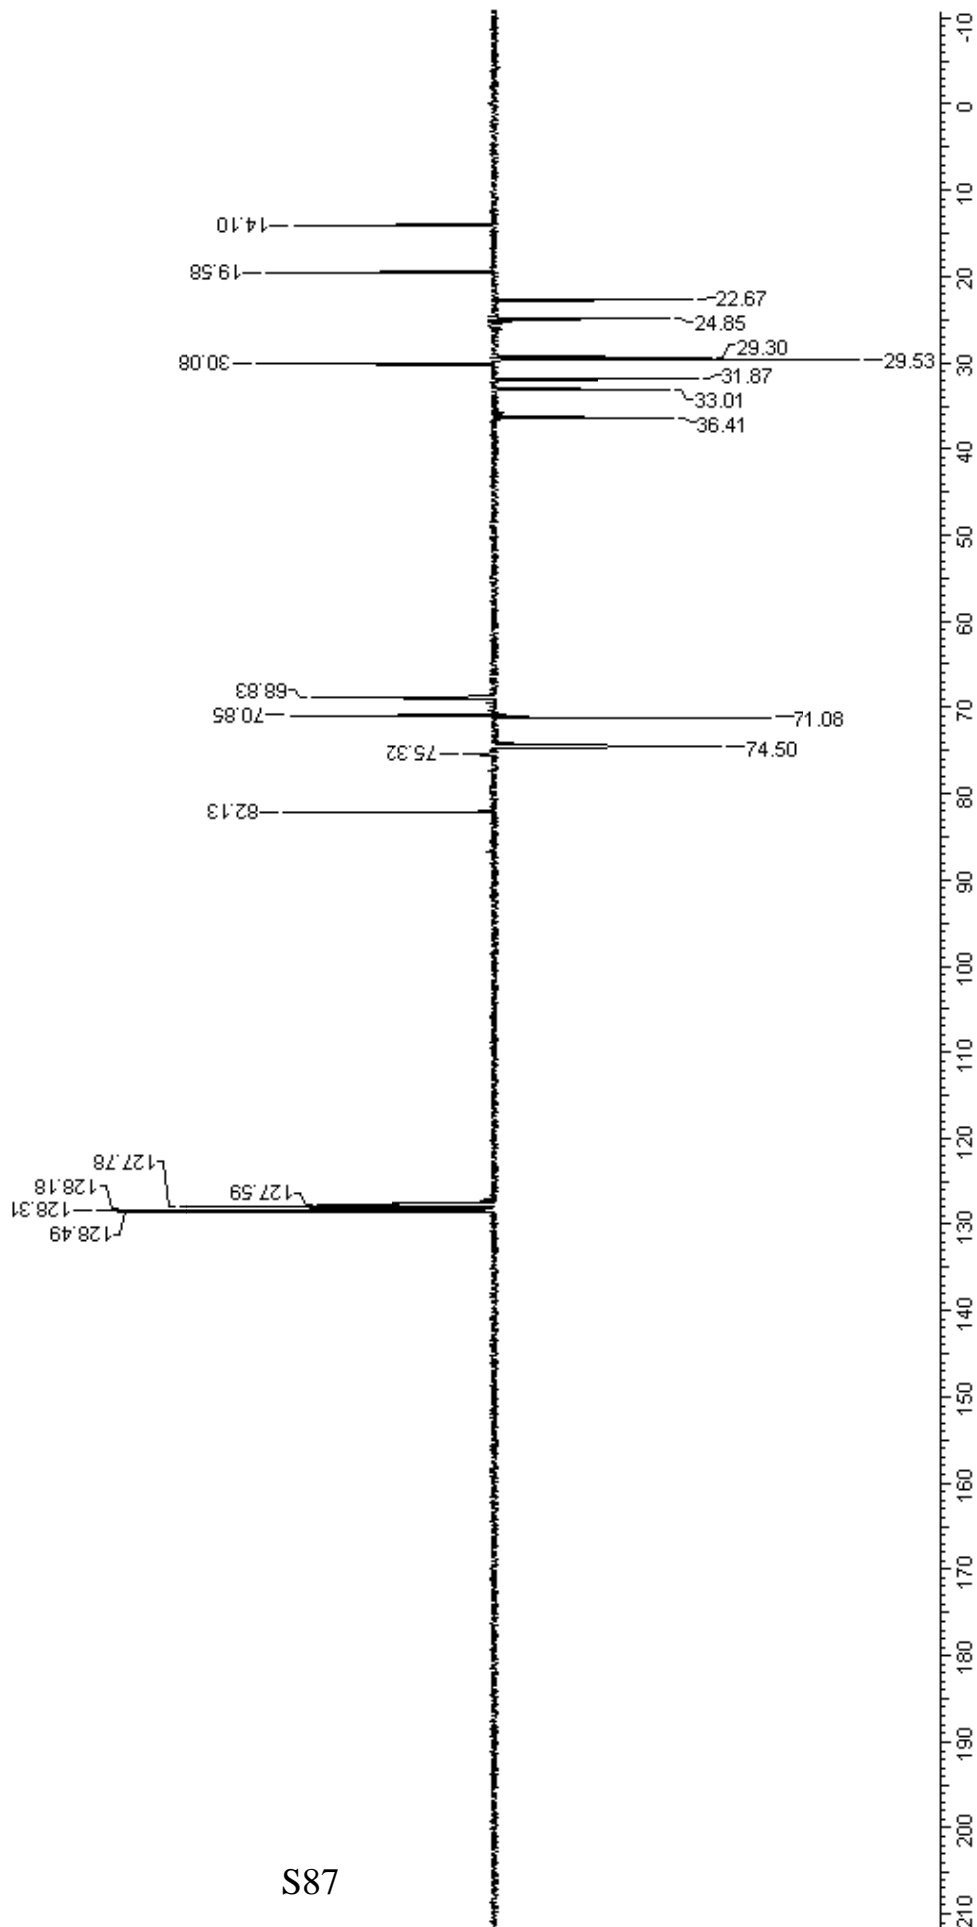

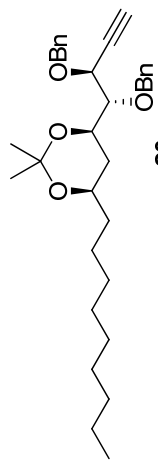

20 Spectrum Report

SN - 502 / 17

Final - Shots 750 - IISER; Run #90; Label O10

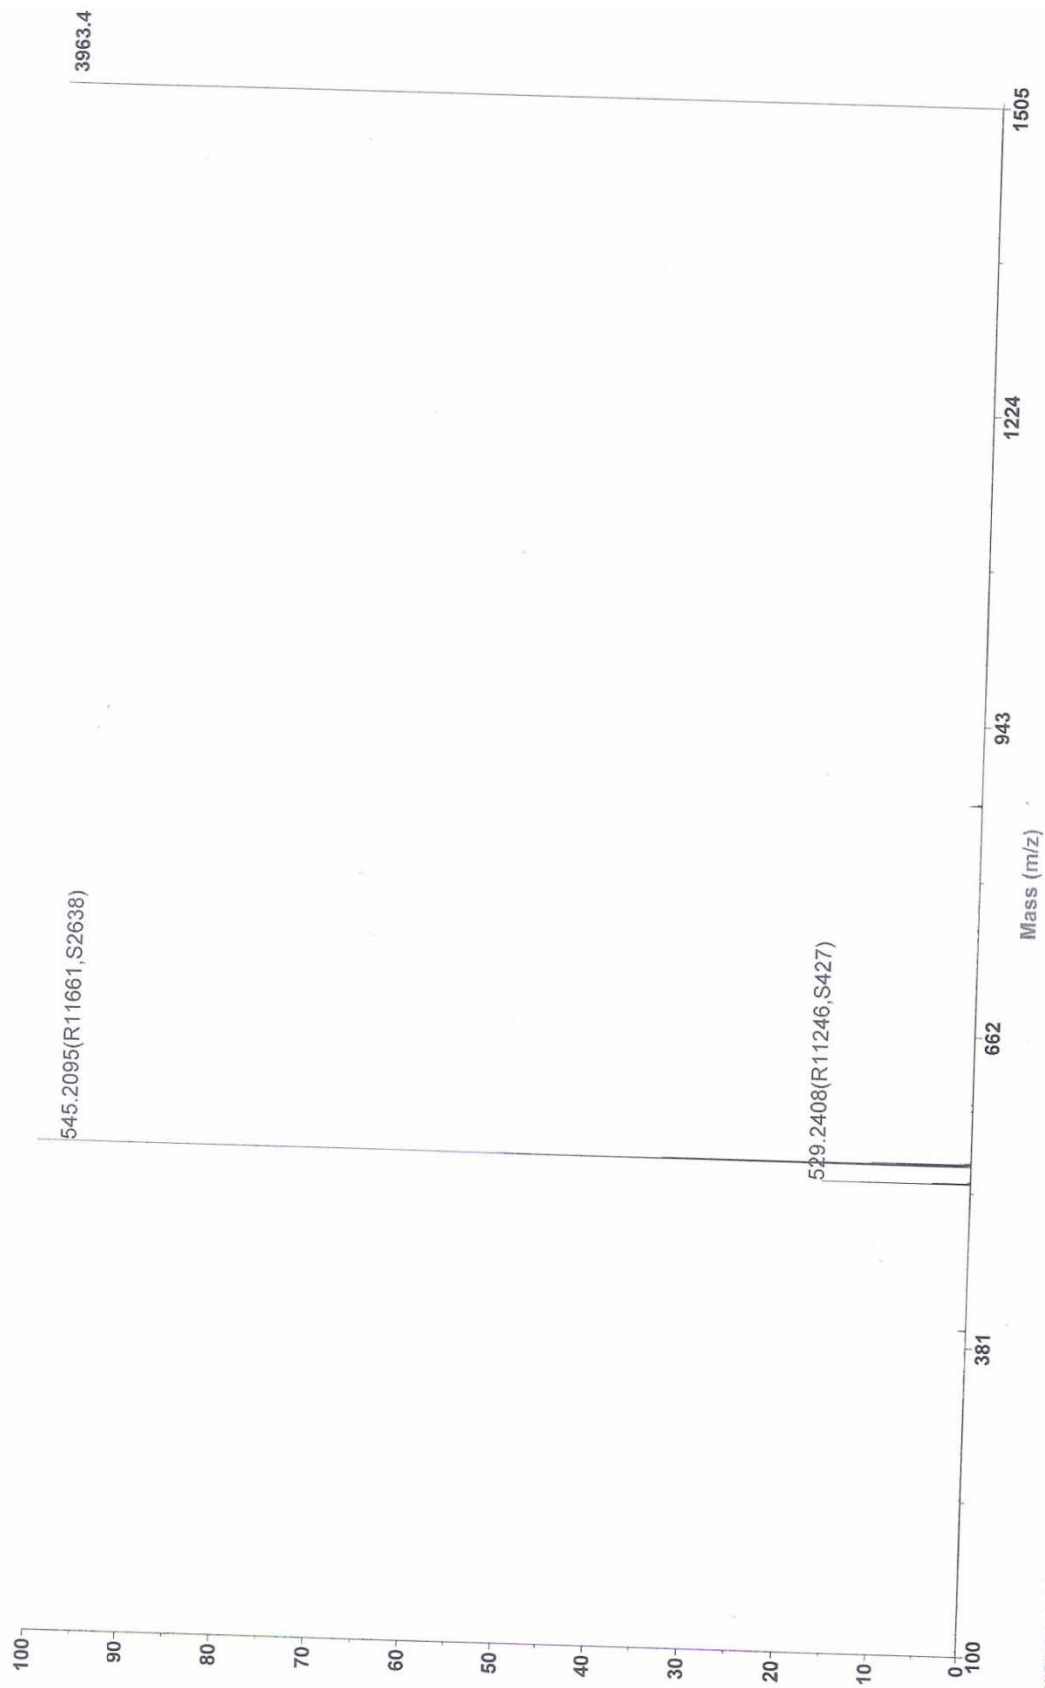



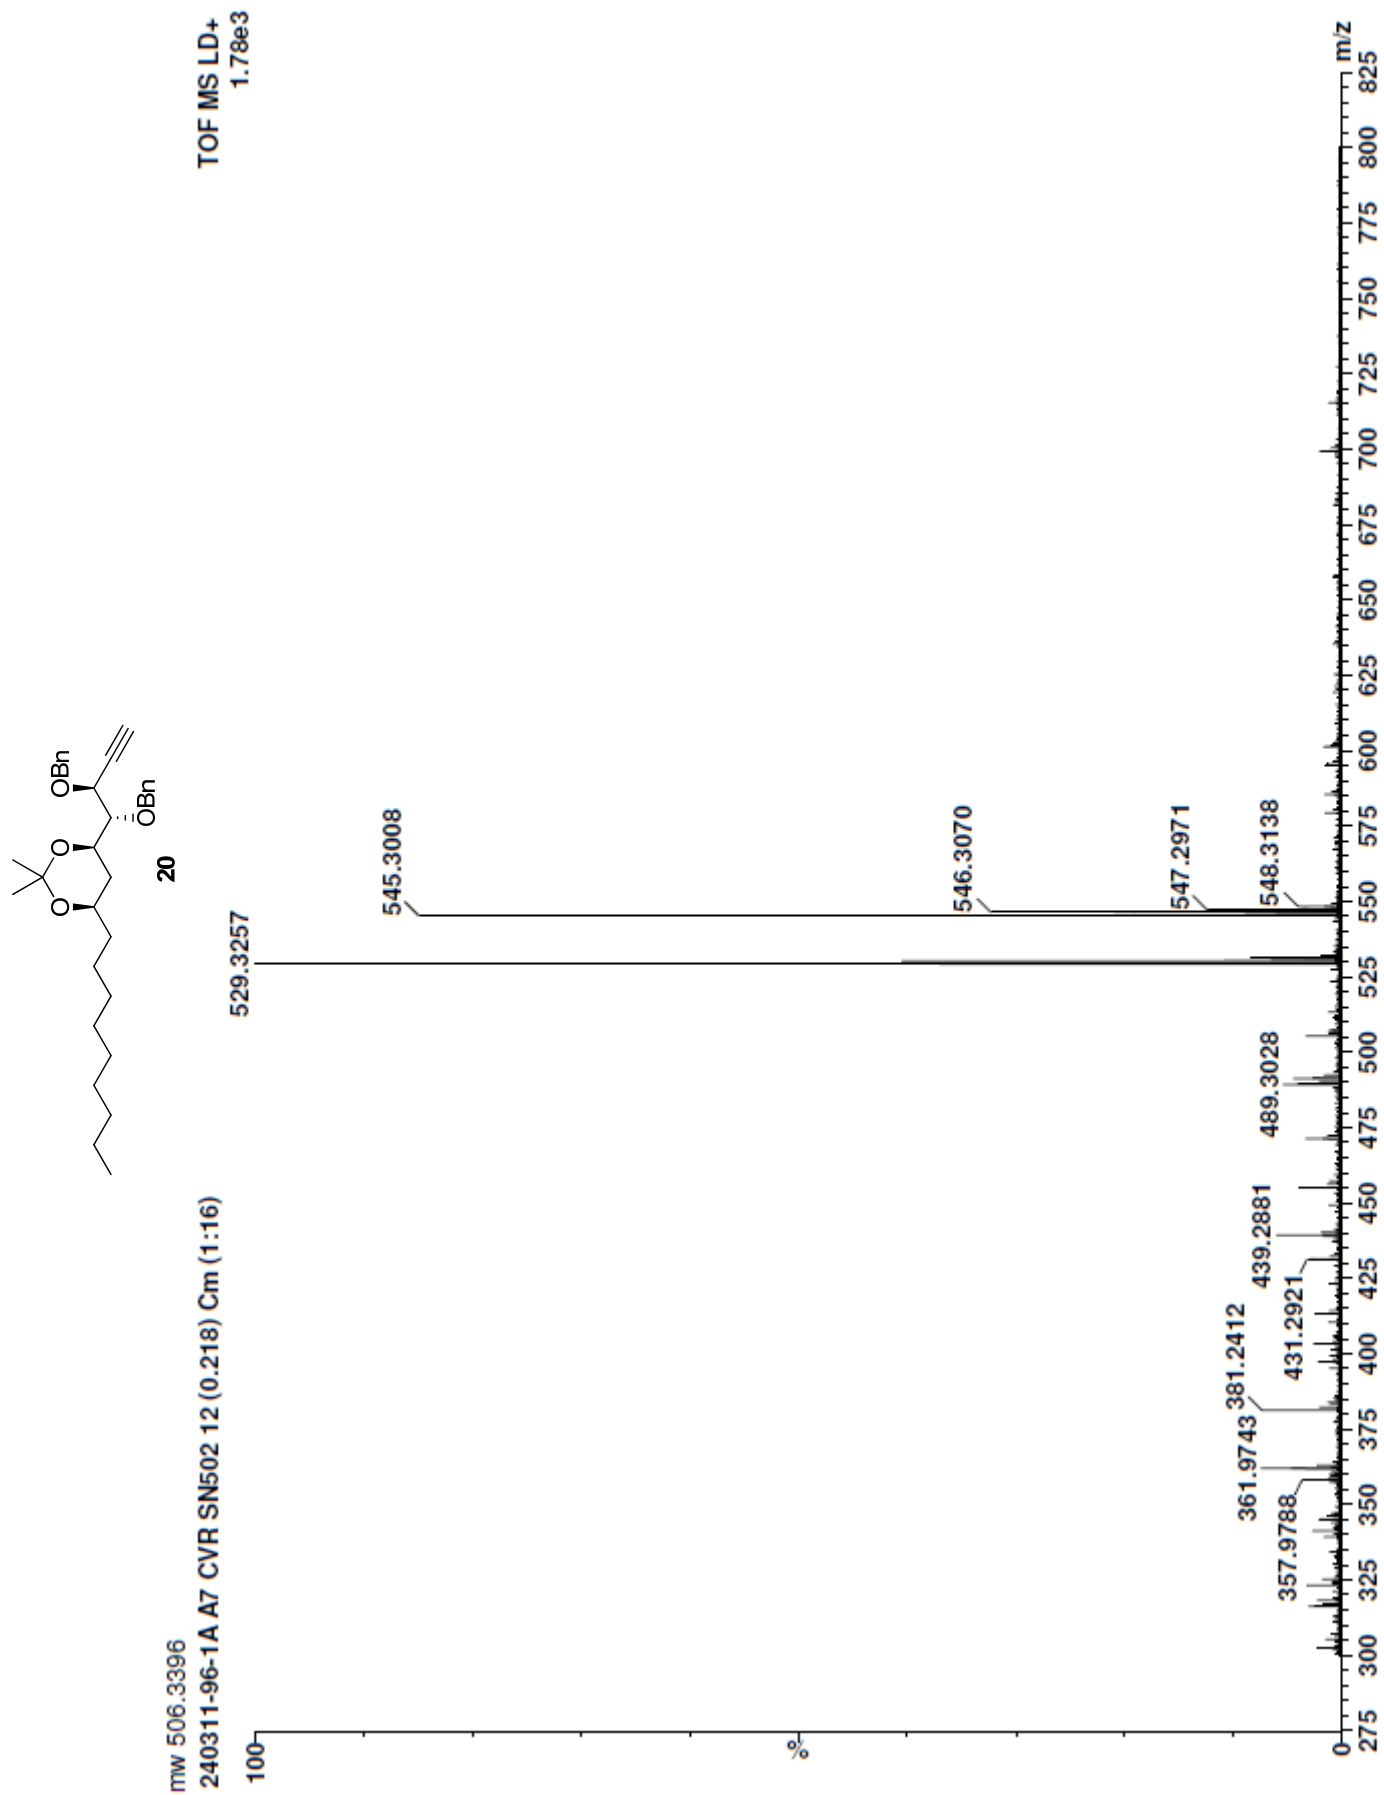

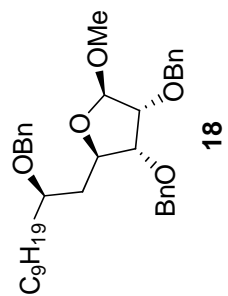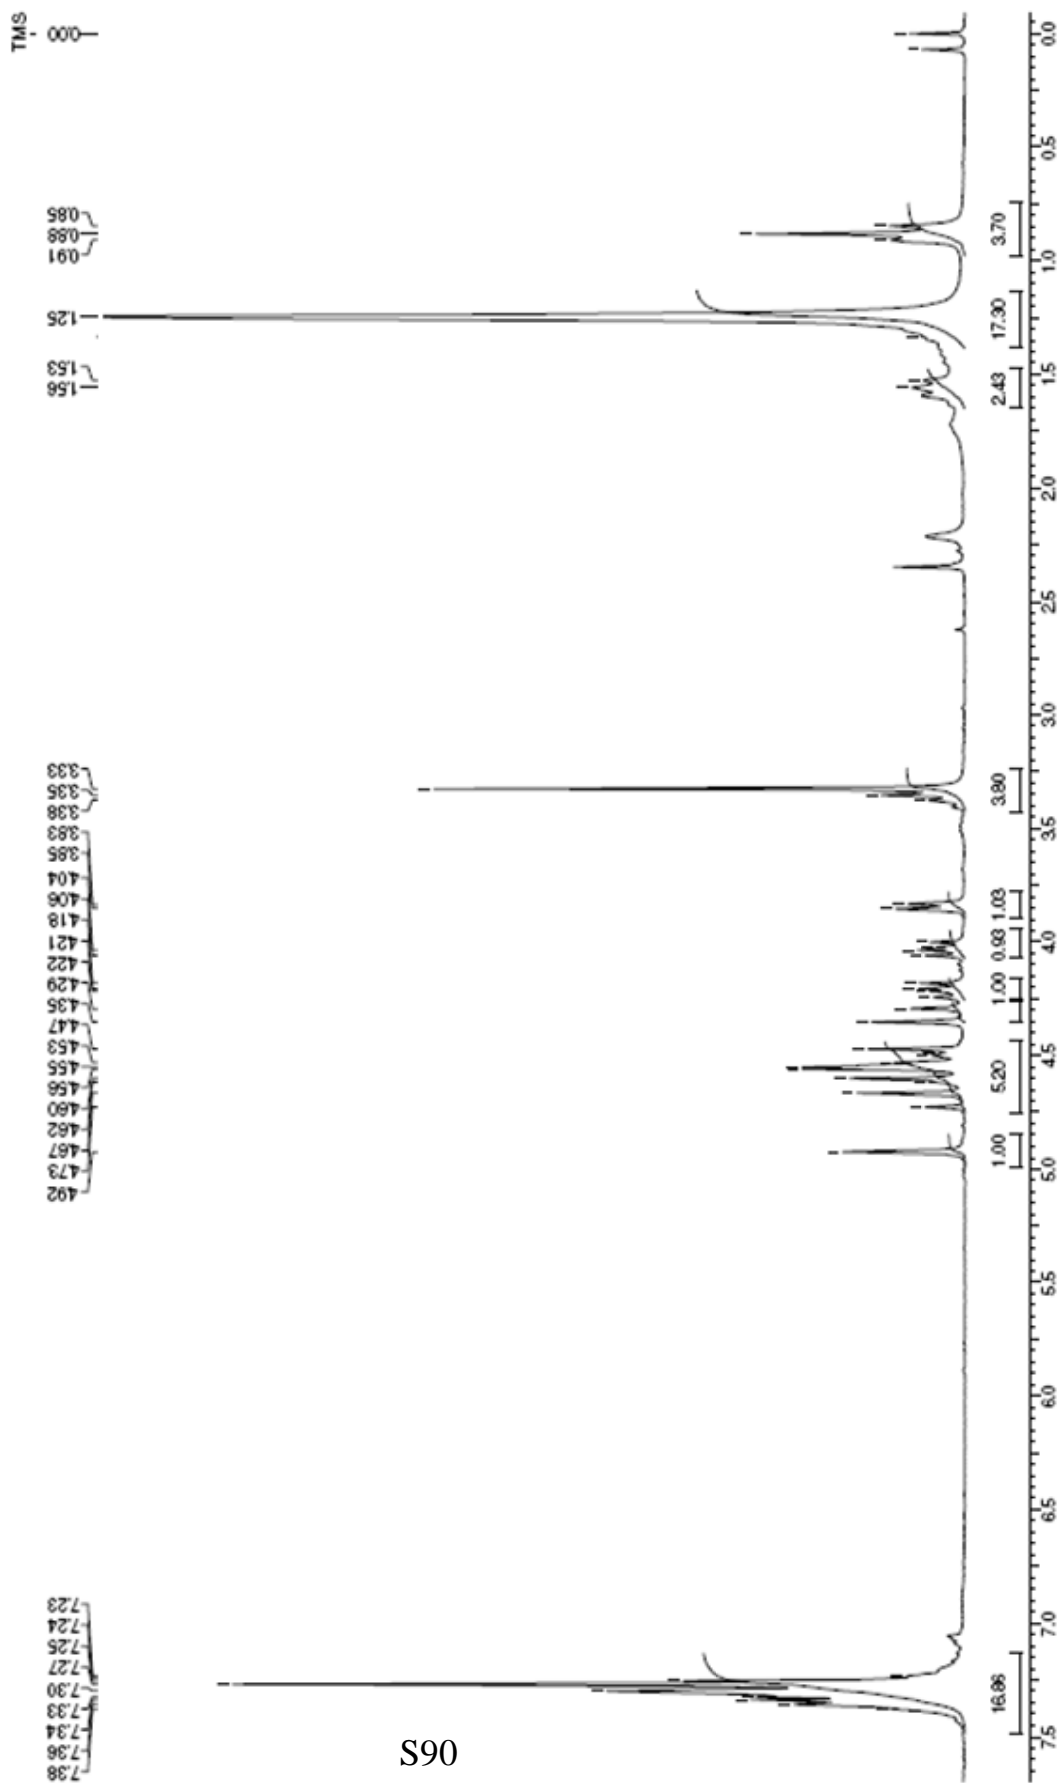

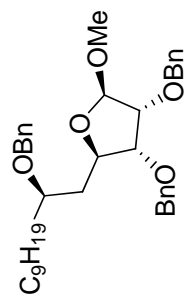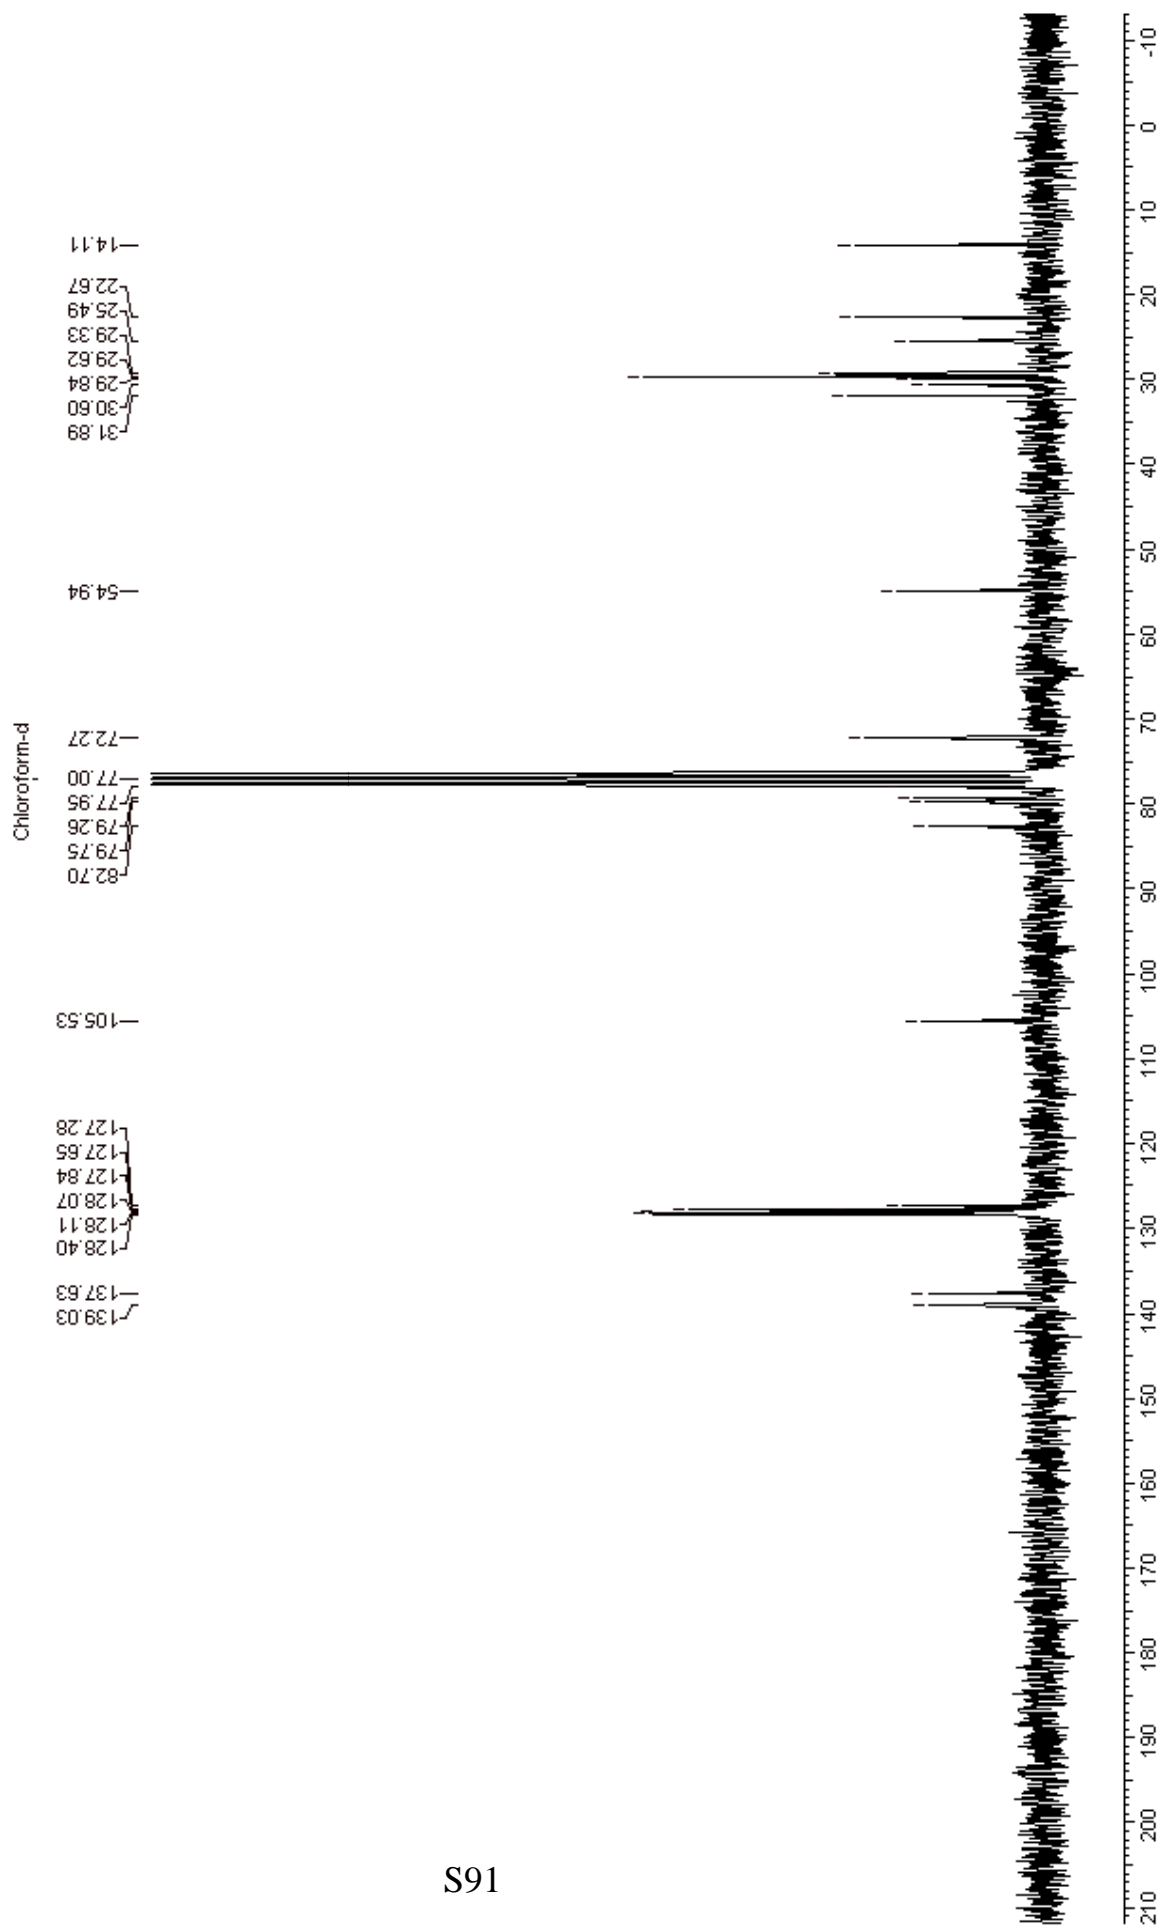

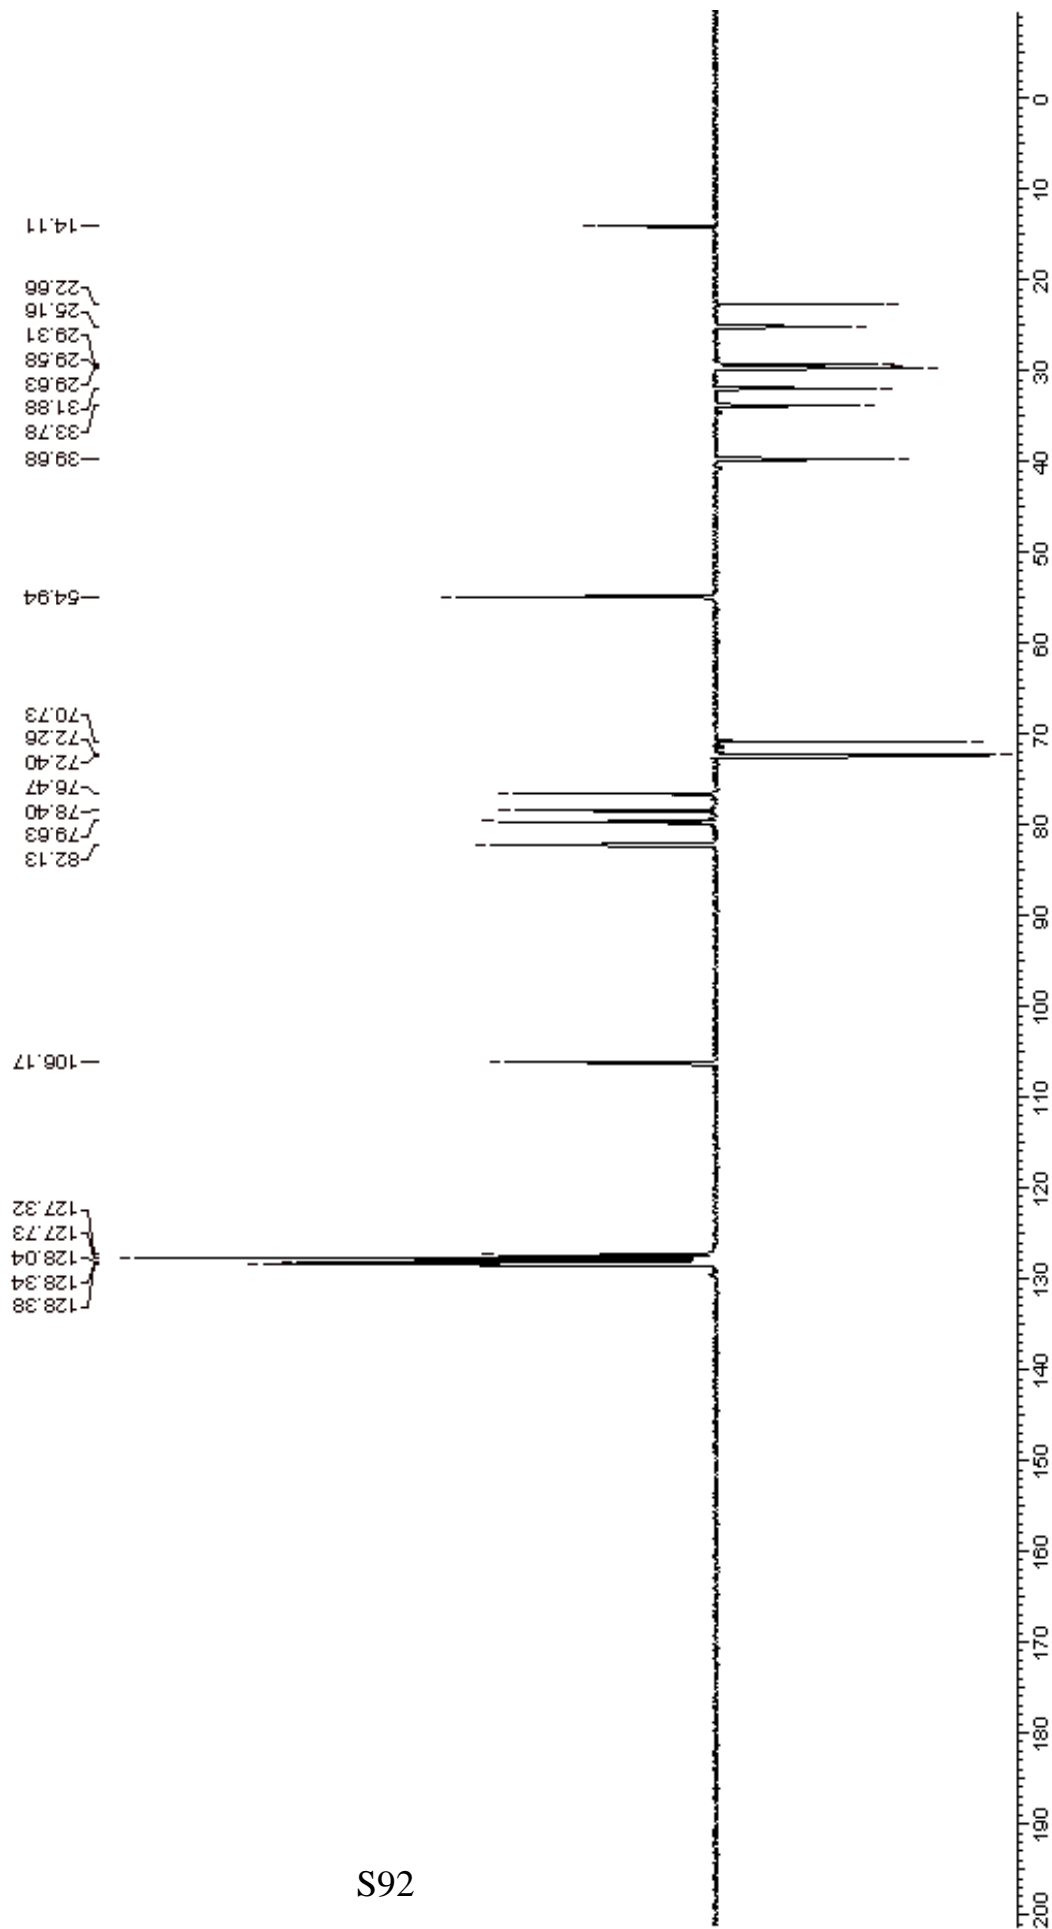

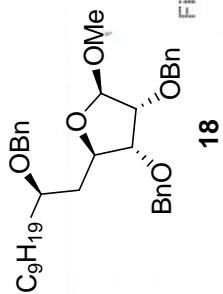

546 (A)  
**Spectrum Report**

Final - Shots 400 - HNG GROUP; Label G7

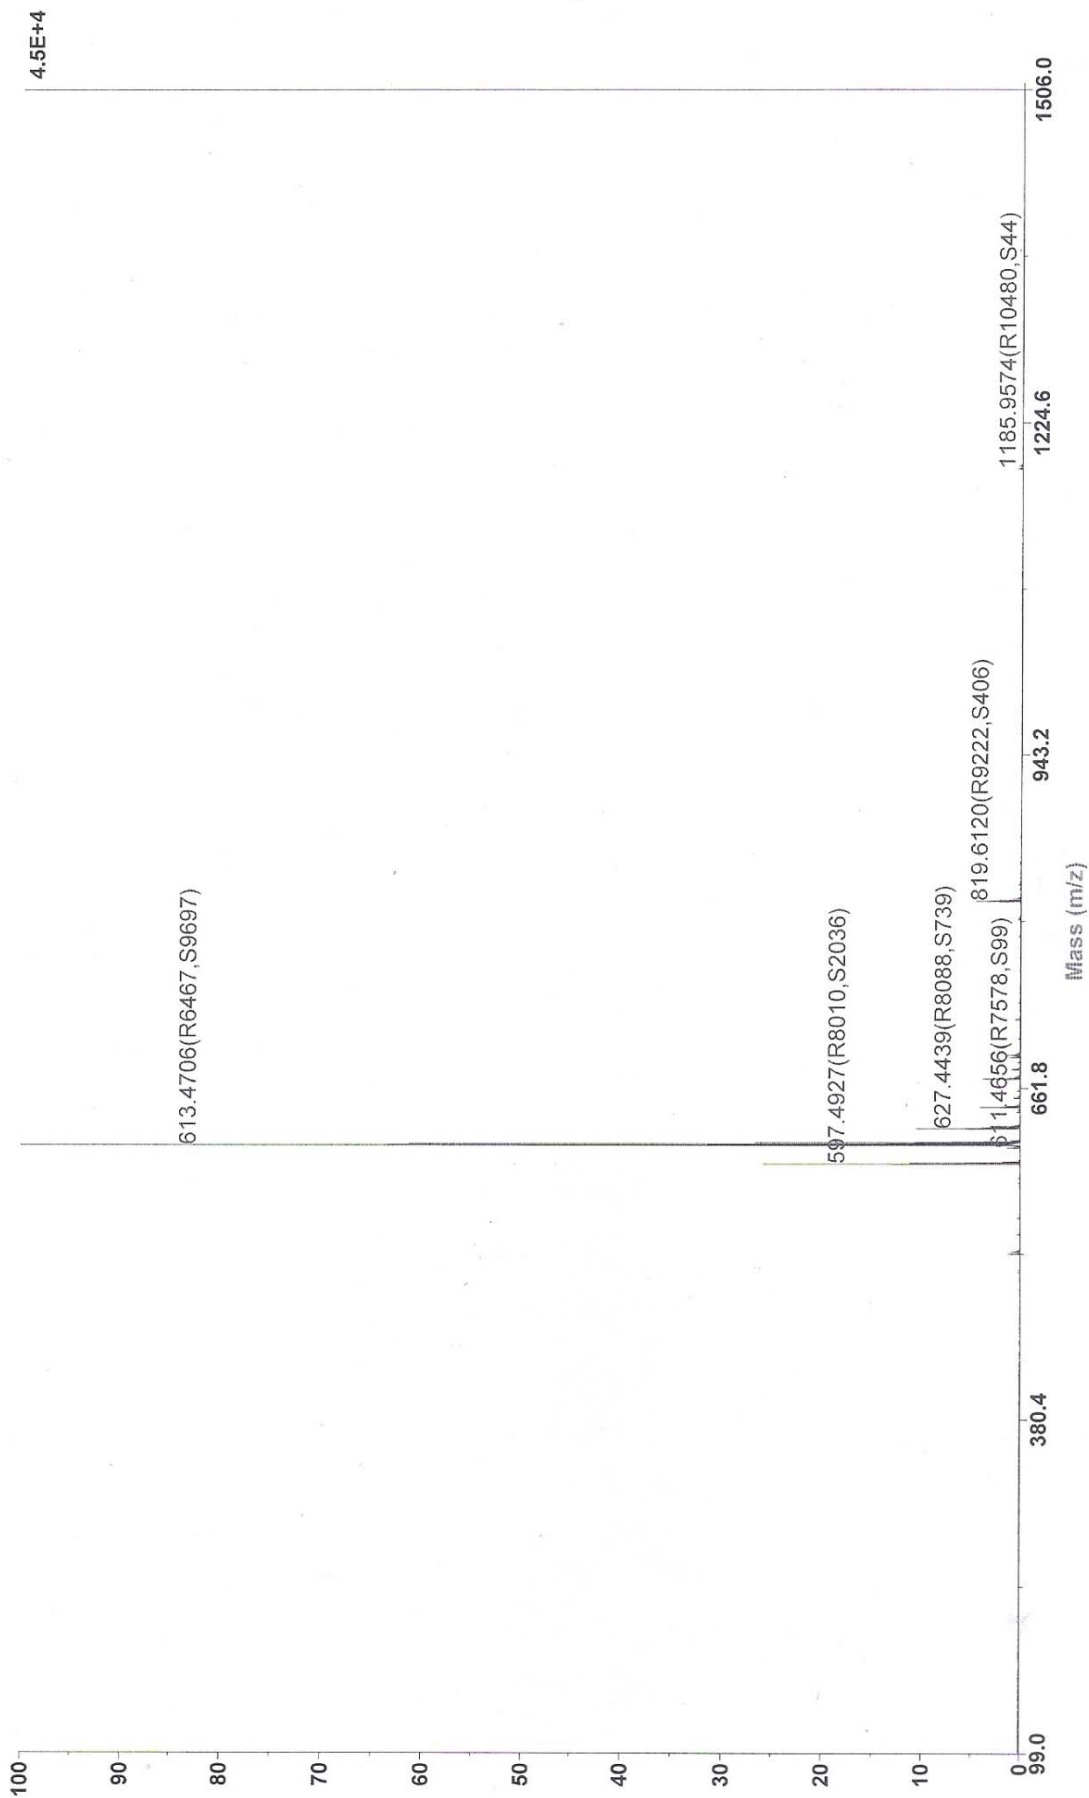

S93

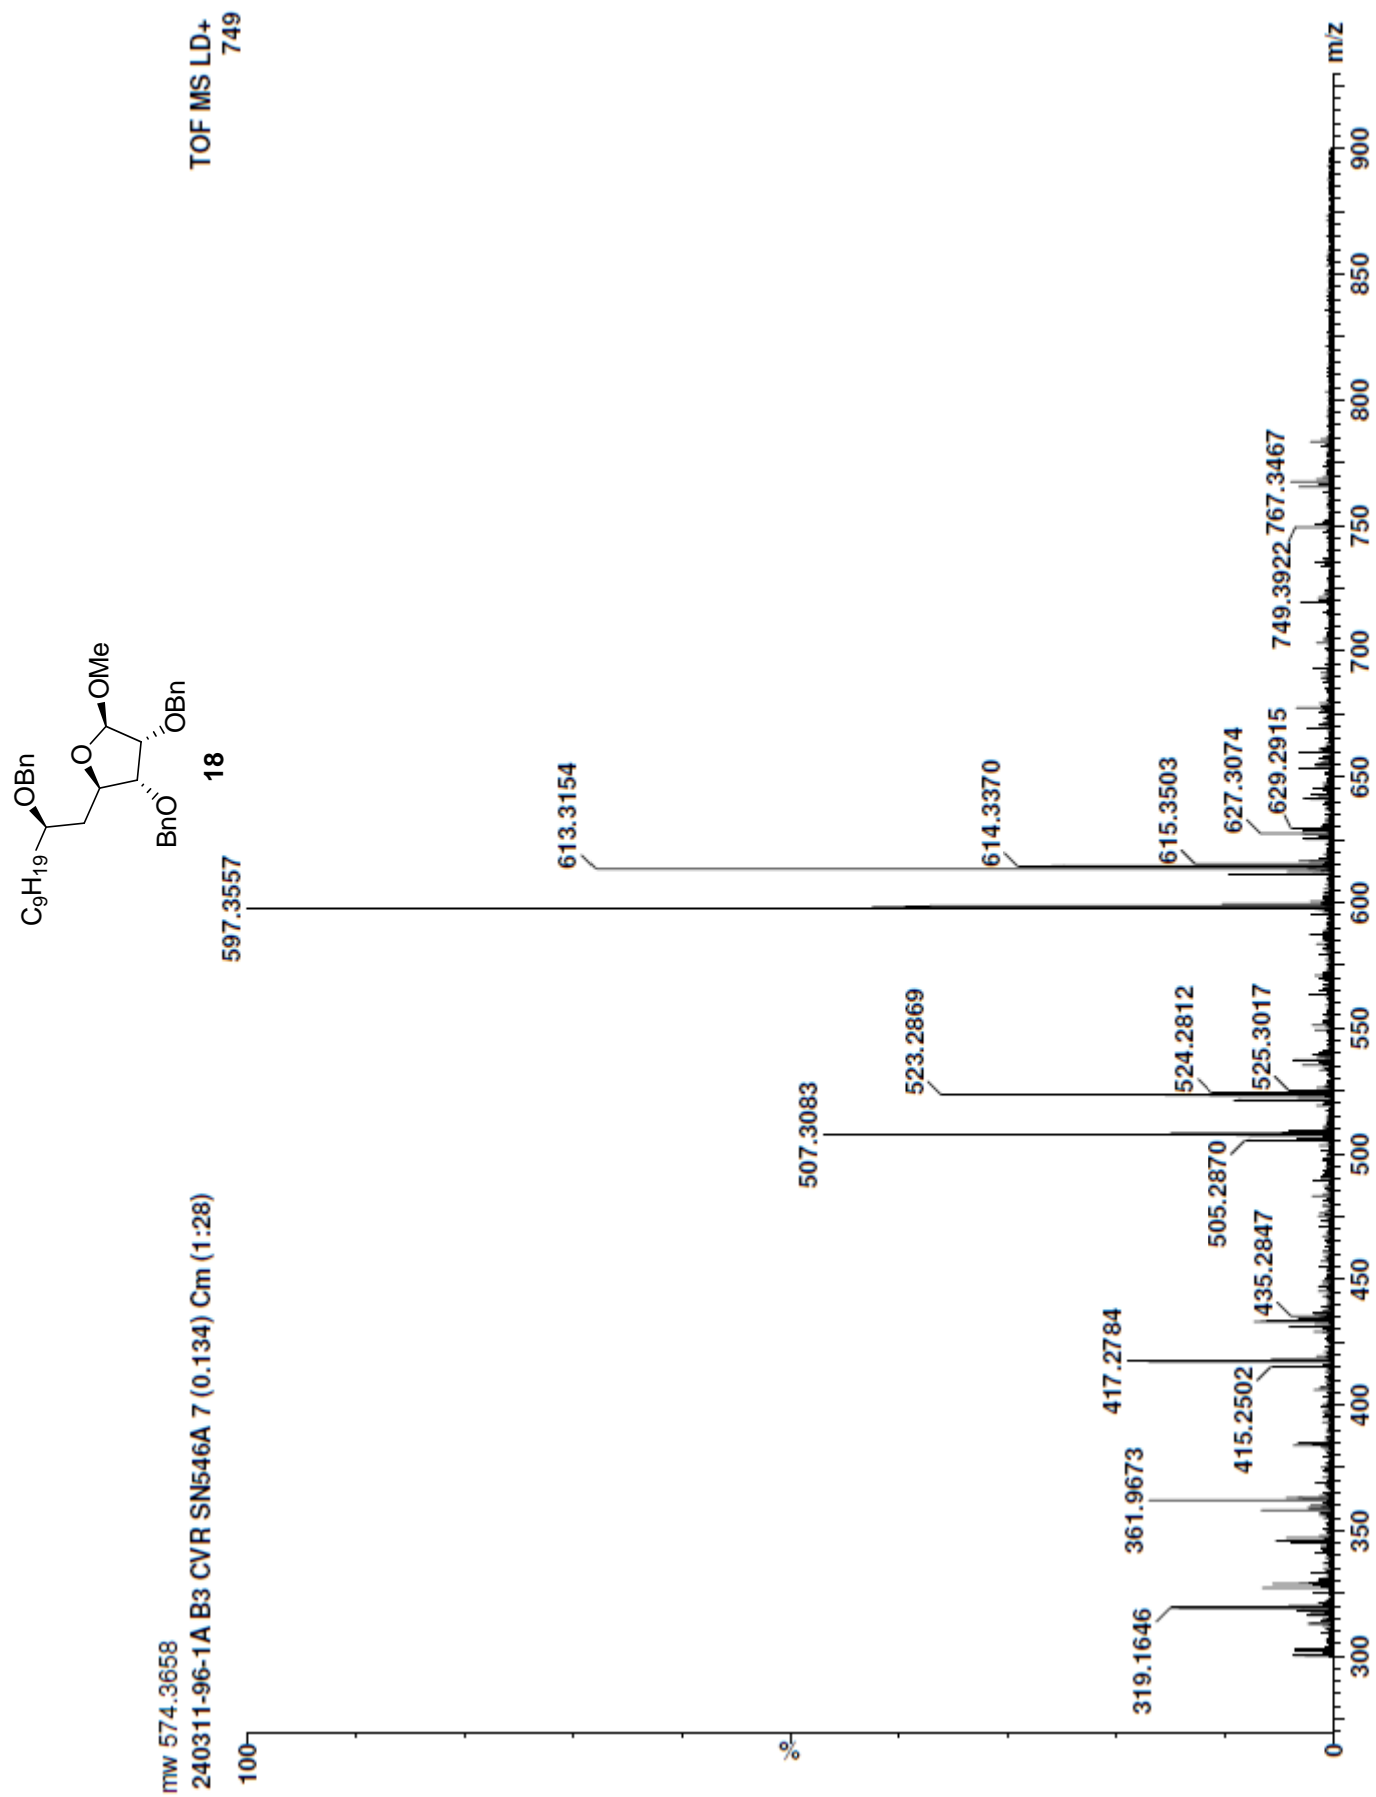

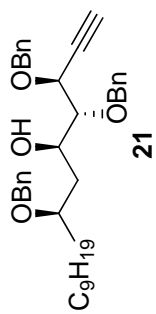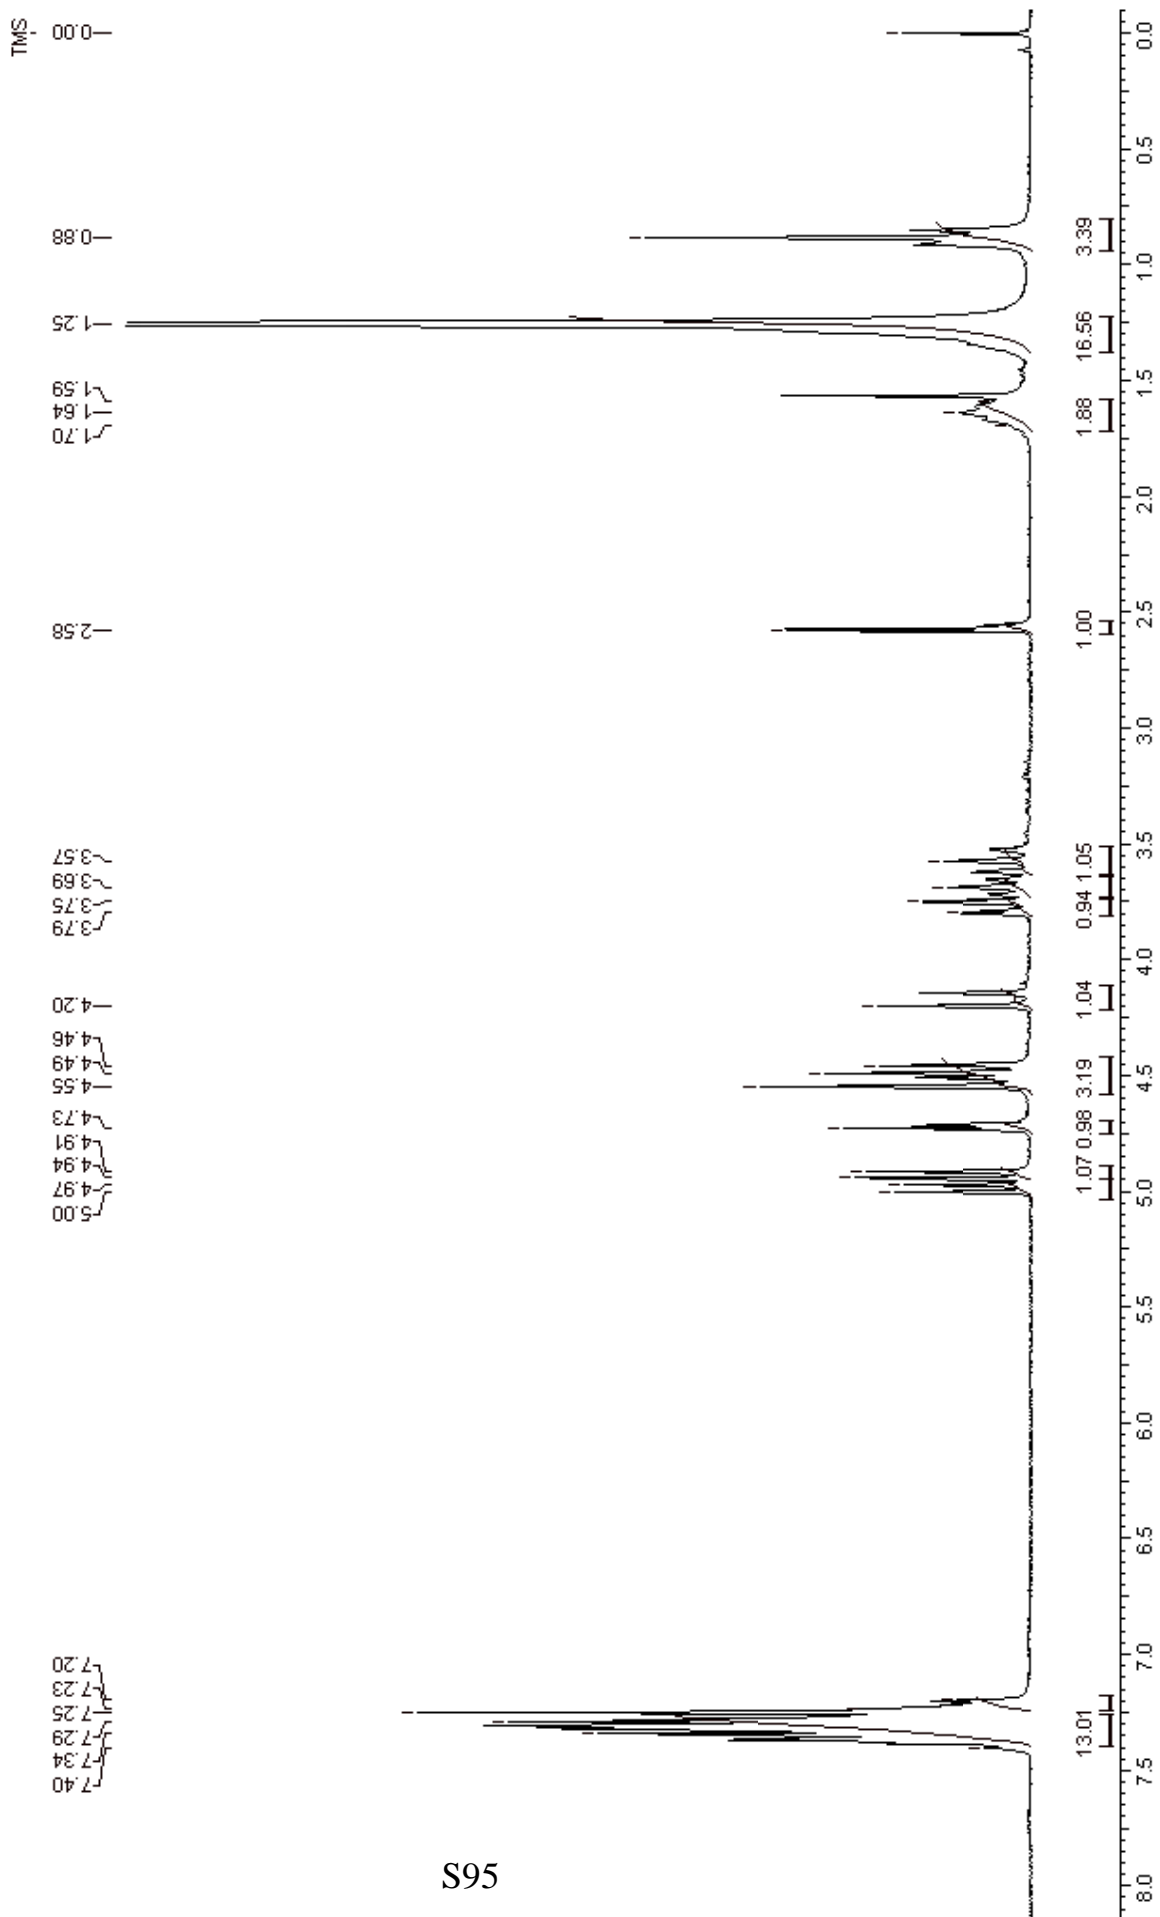

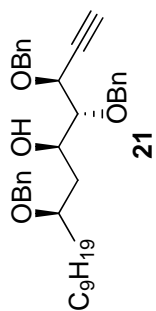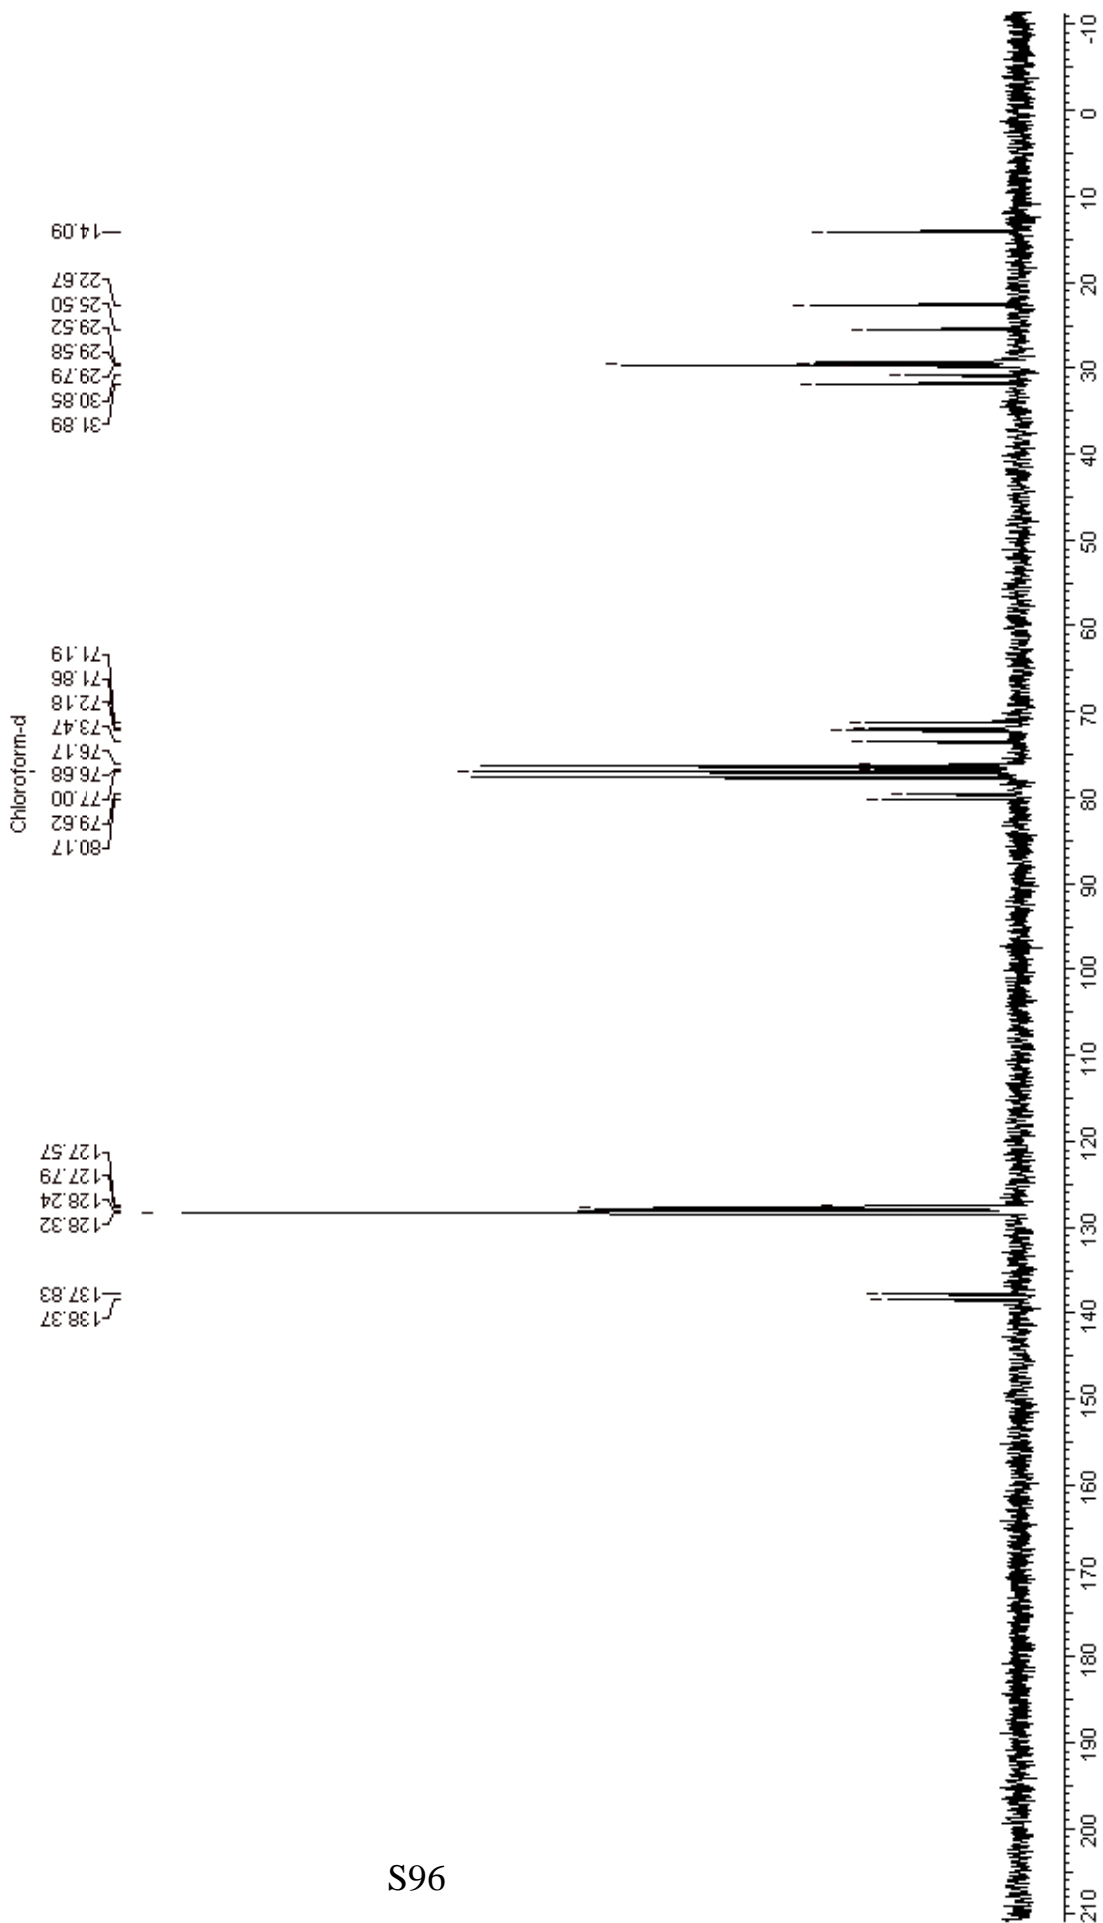



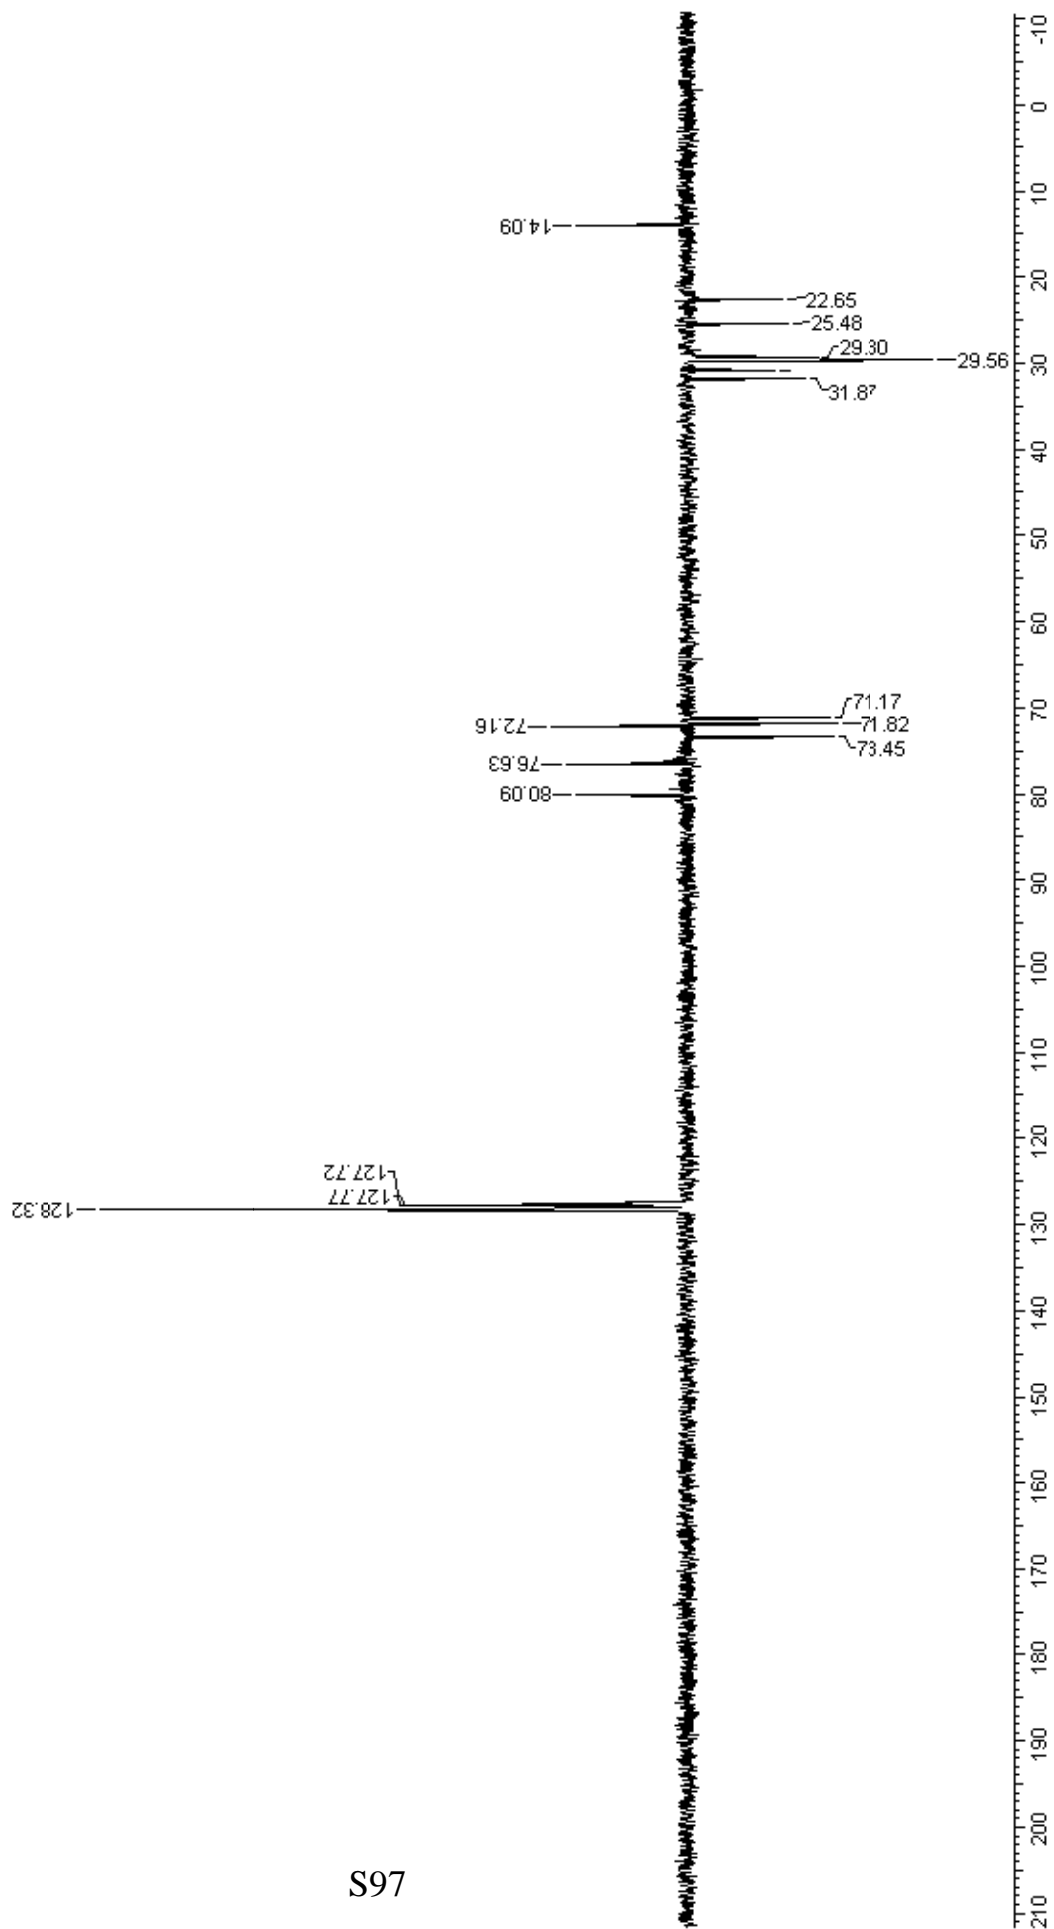

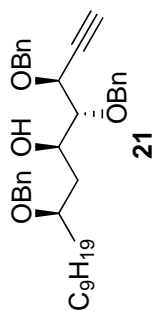

+LC/MSMS - 0 STAR PULGAR

+TOF MS: 0.033 to 0.317 min from ALKYNIEOH.wiff  
a=3.4114286644702460e-004, 10=-3.24359683266109440e+001

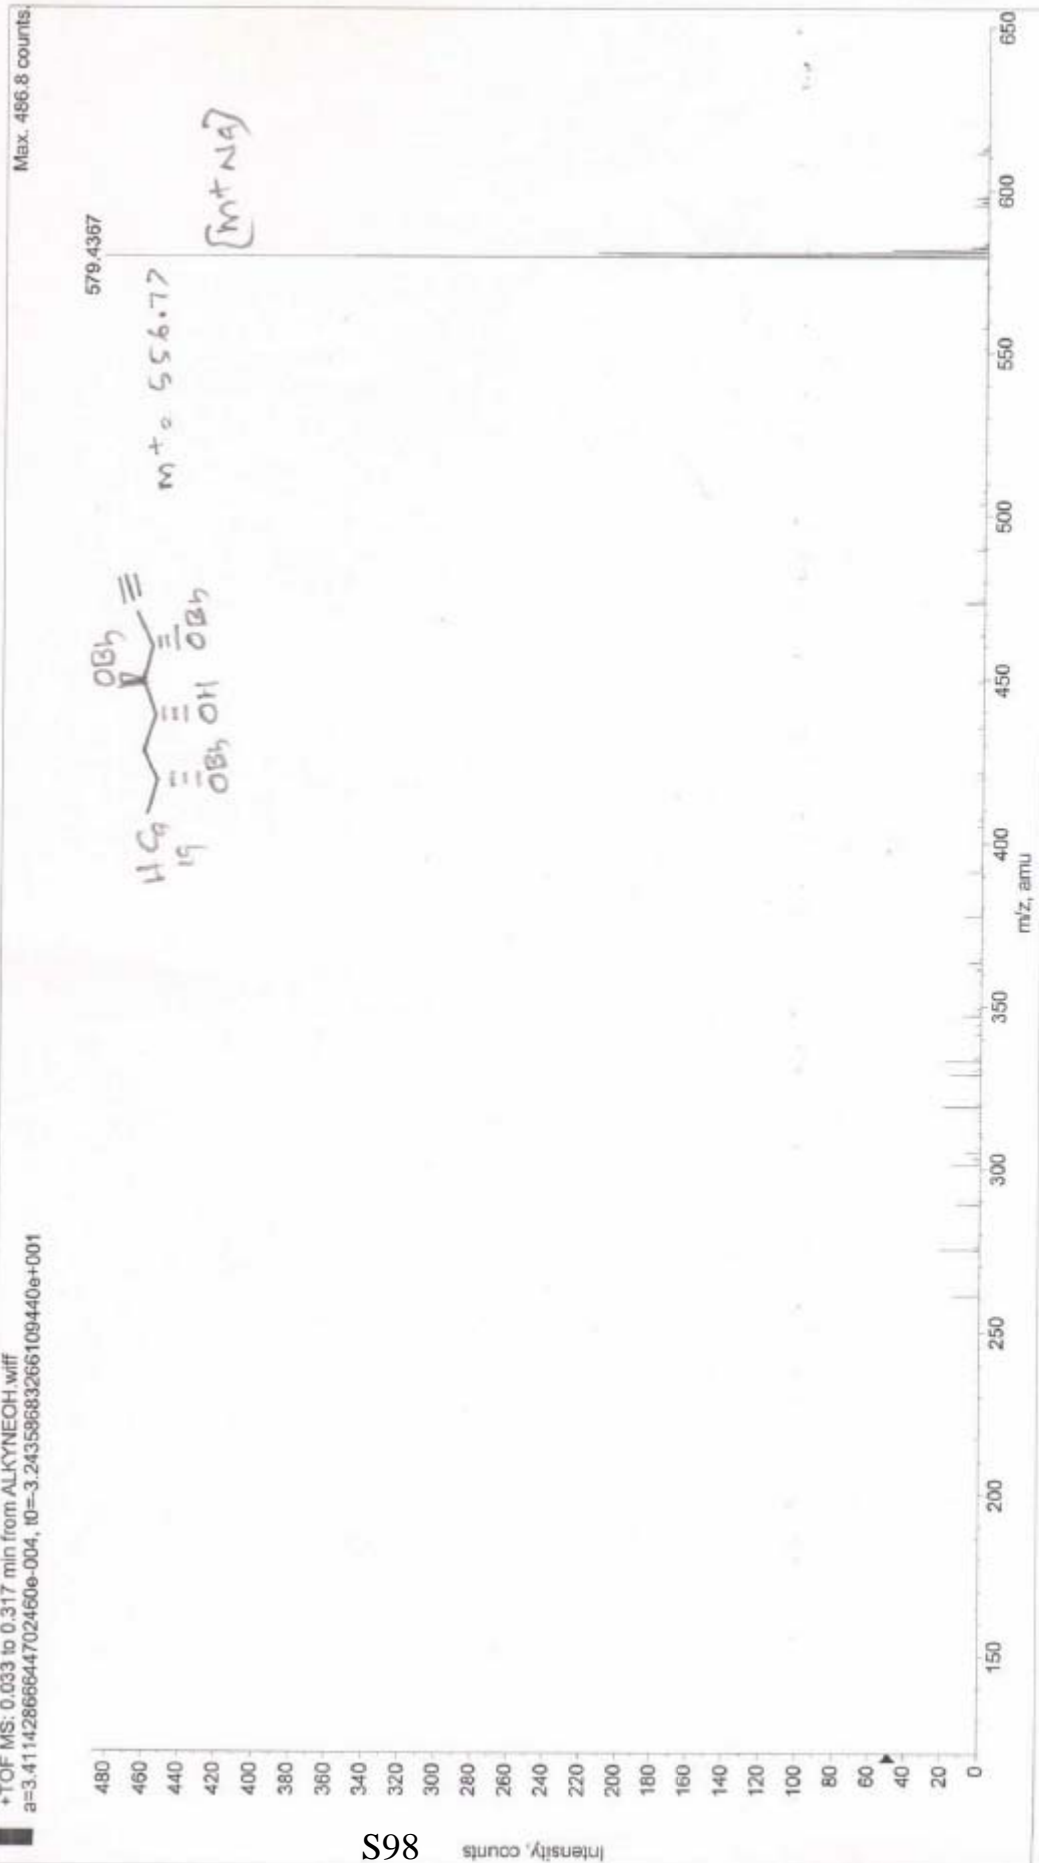

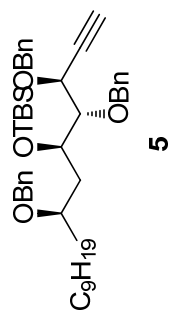

5

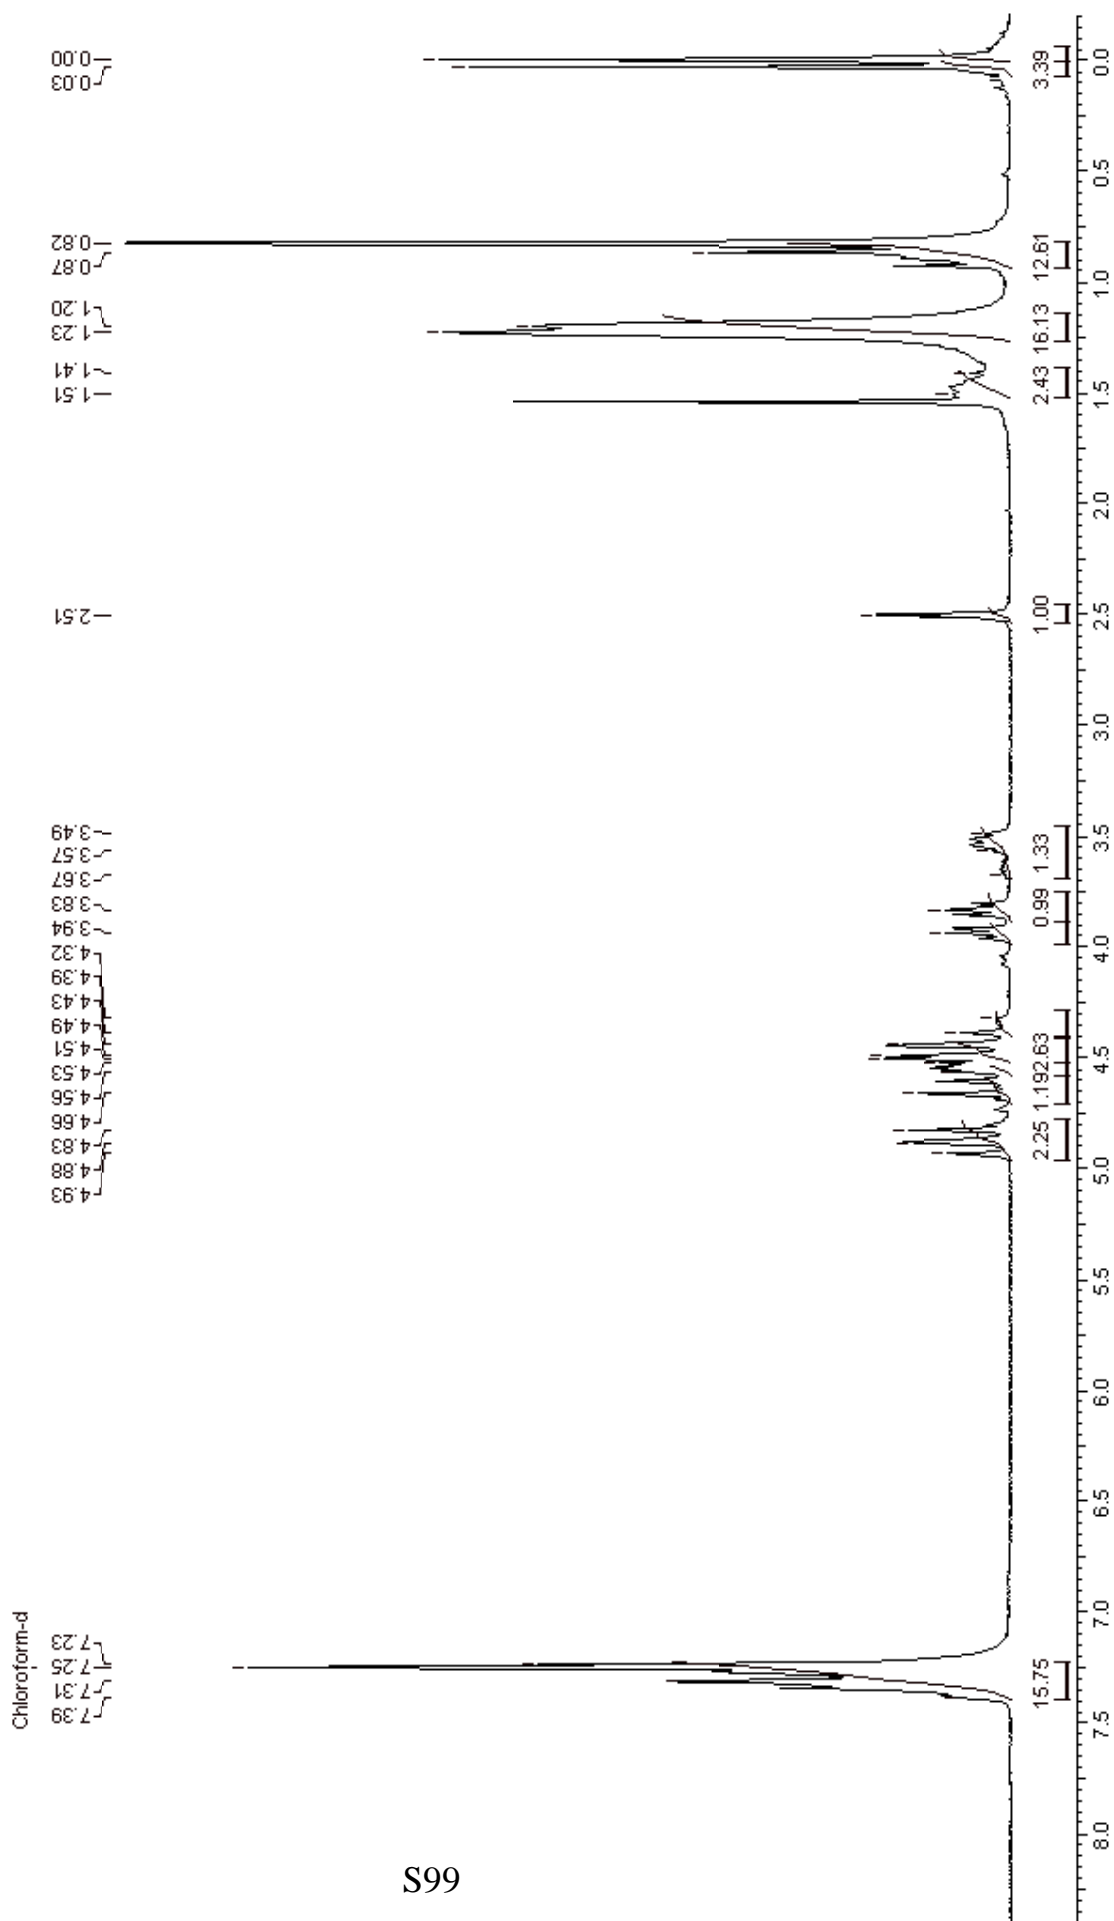

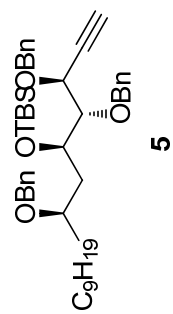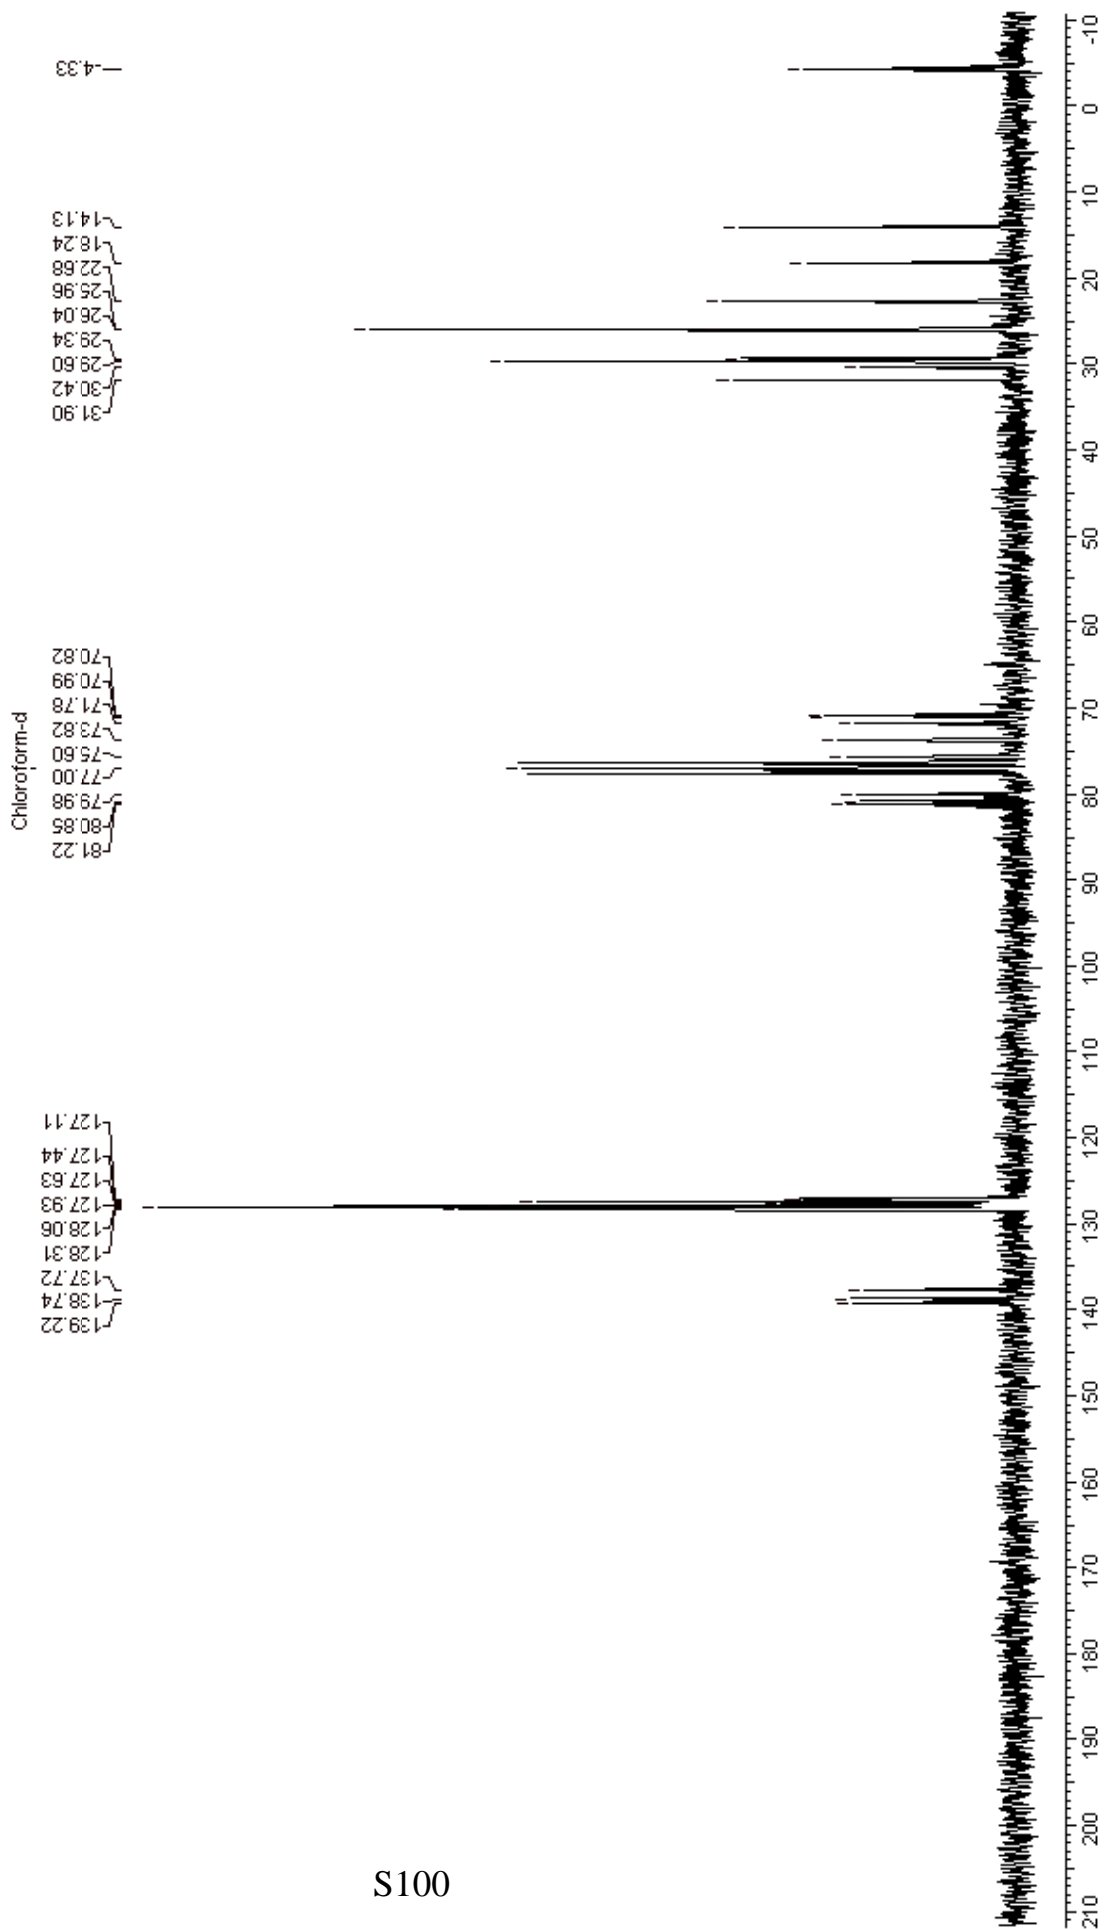

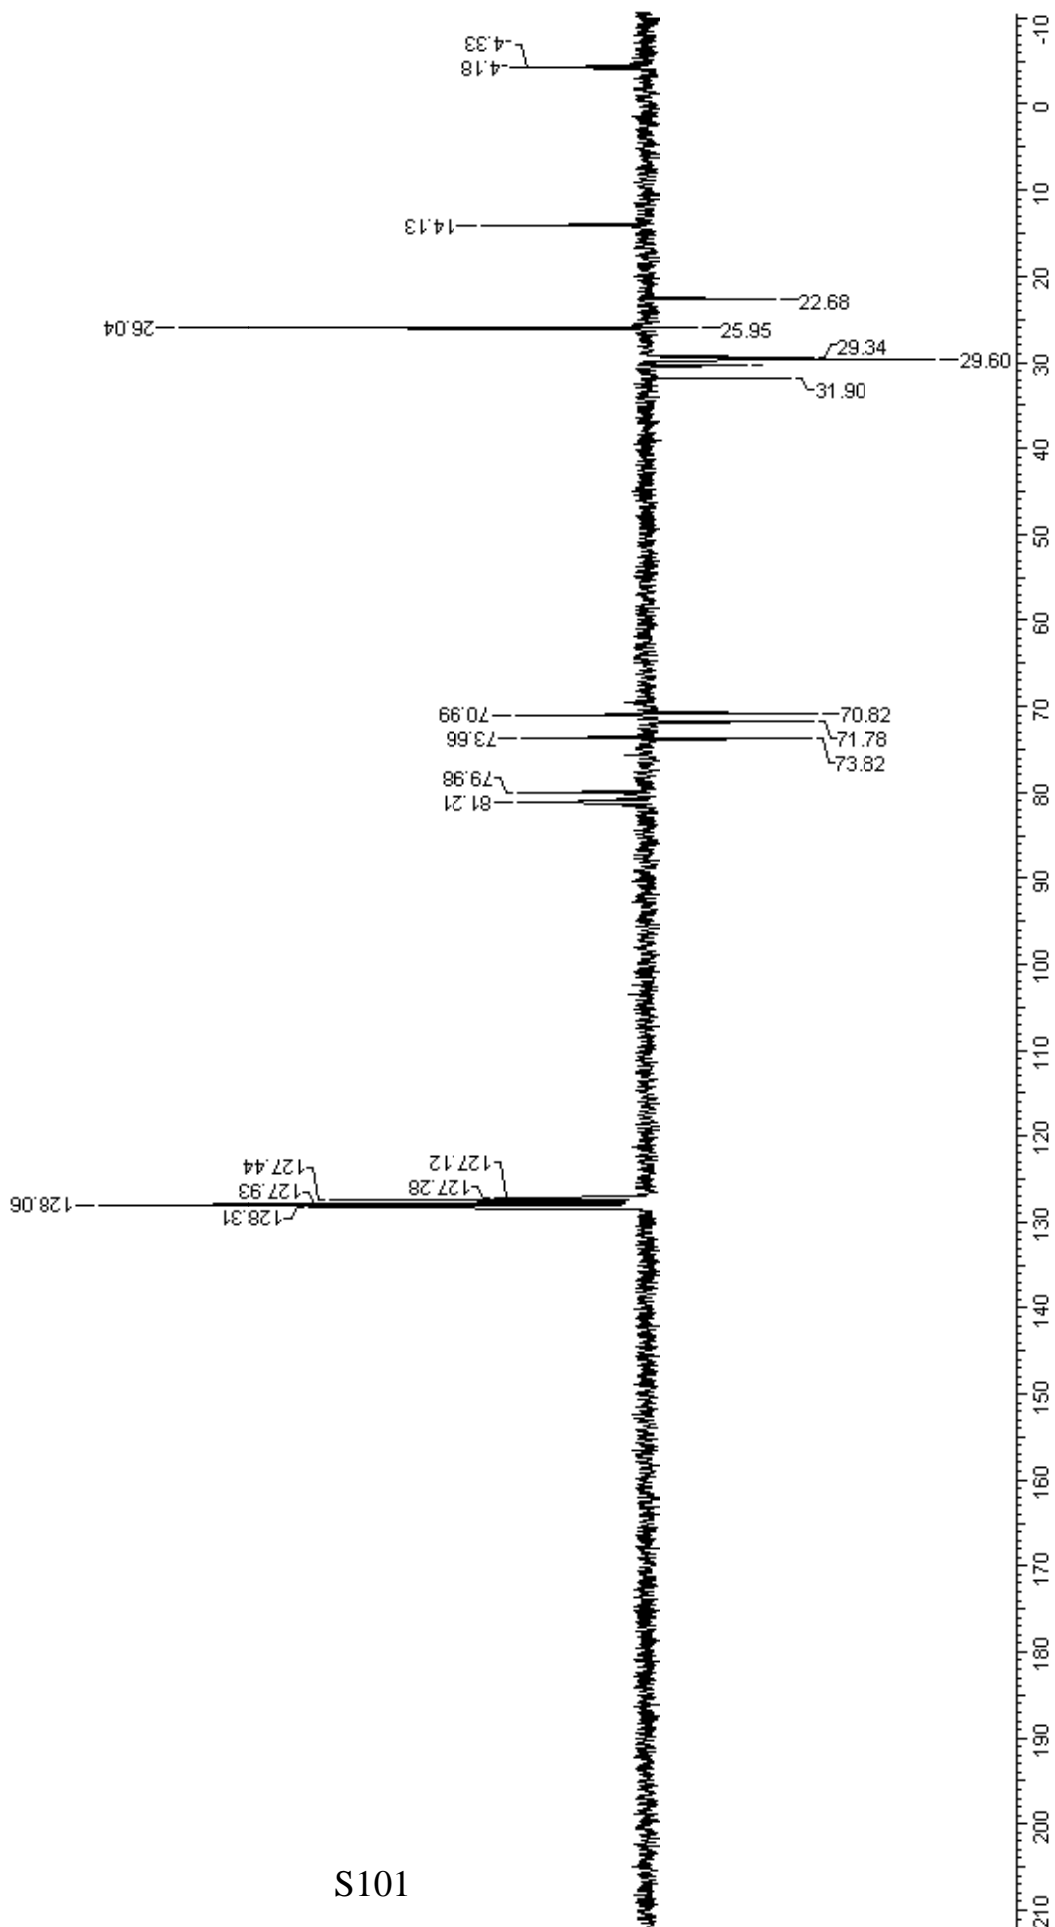

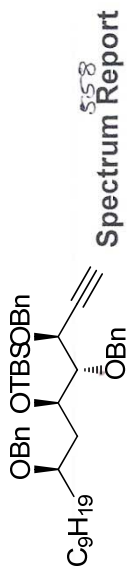

Final - Shots 400 - HNG GROUP; Label G10

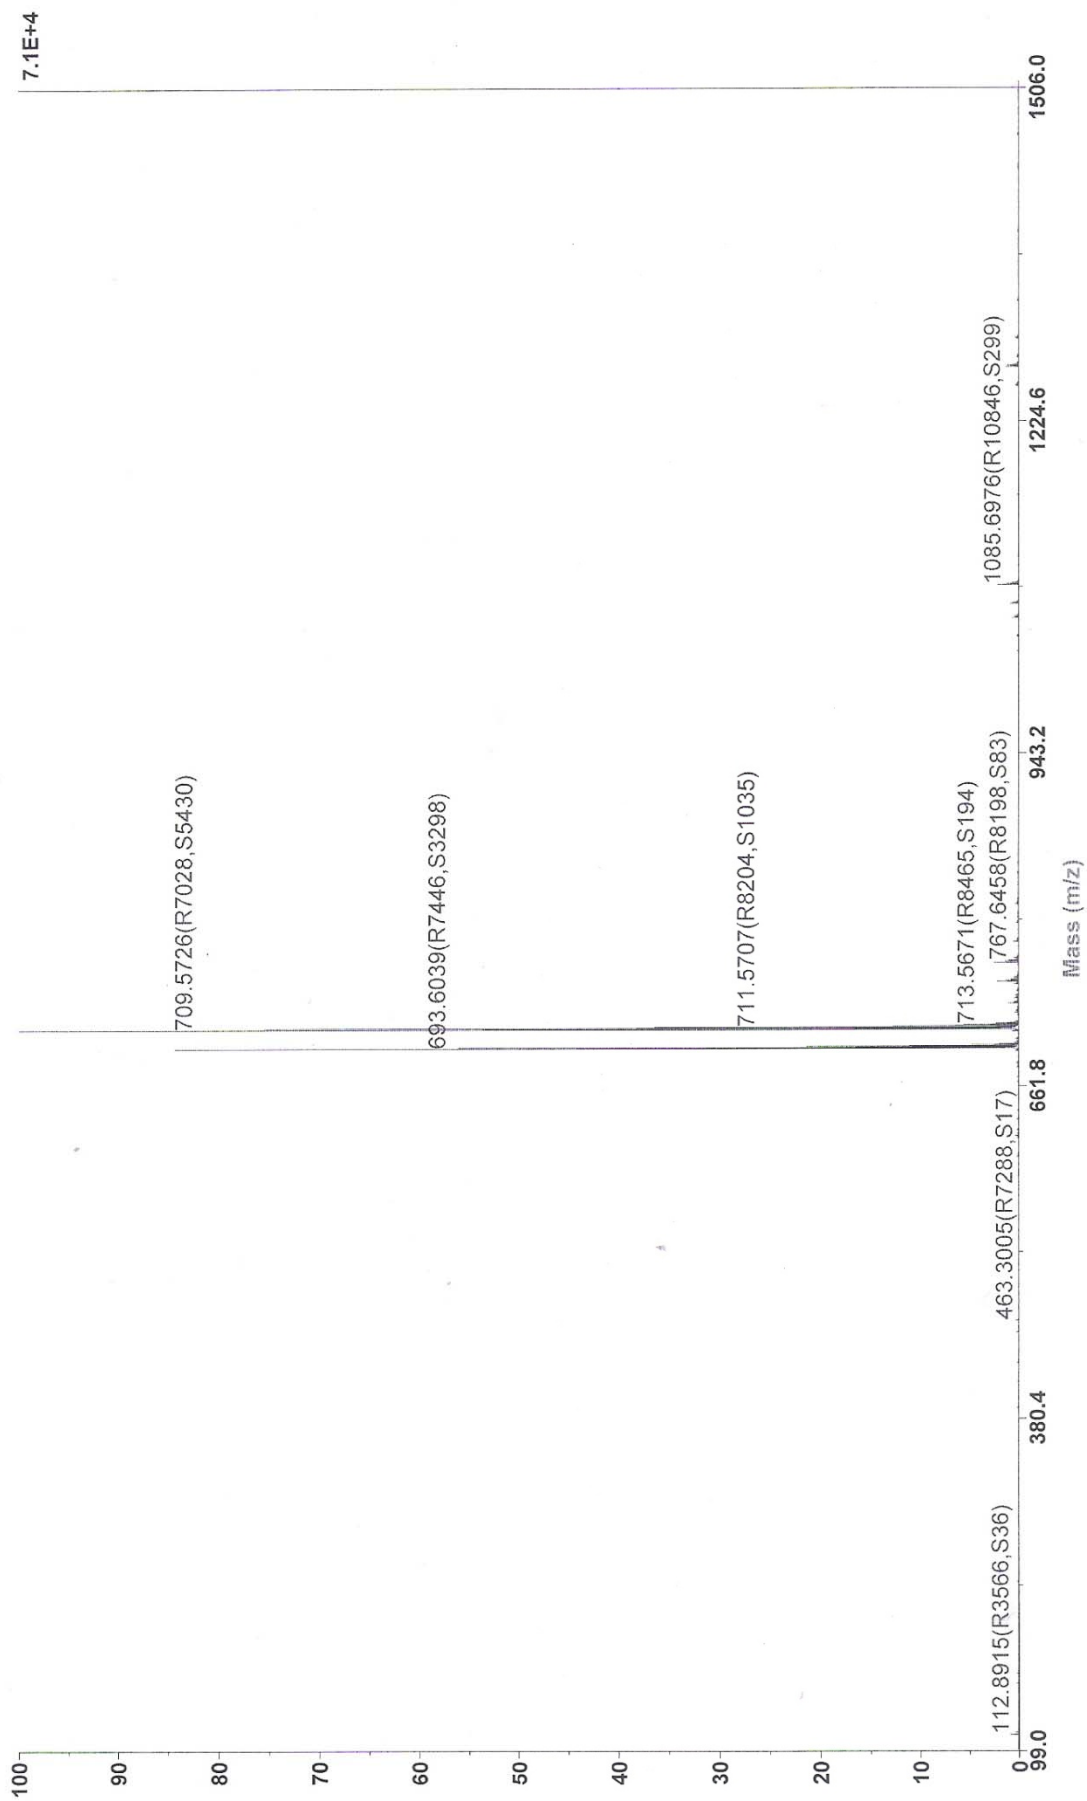

S102

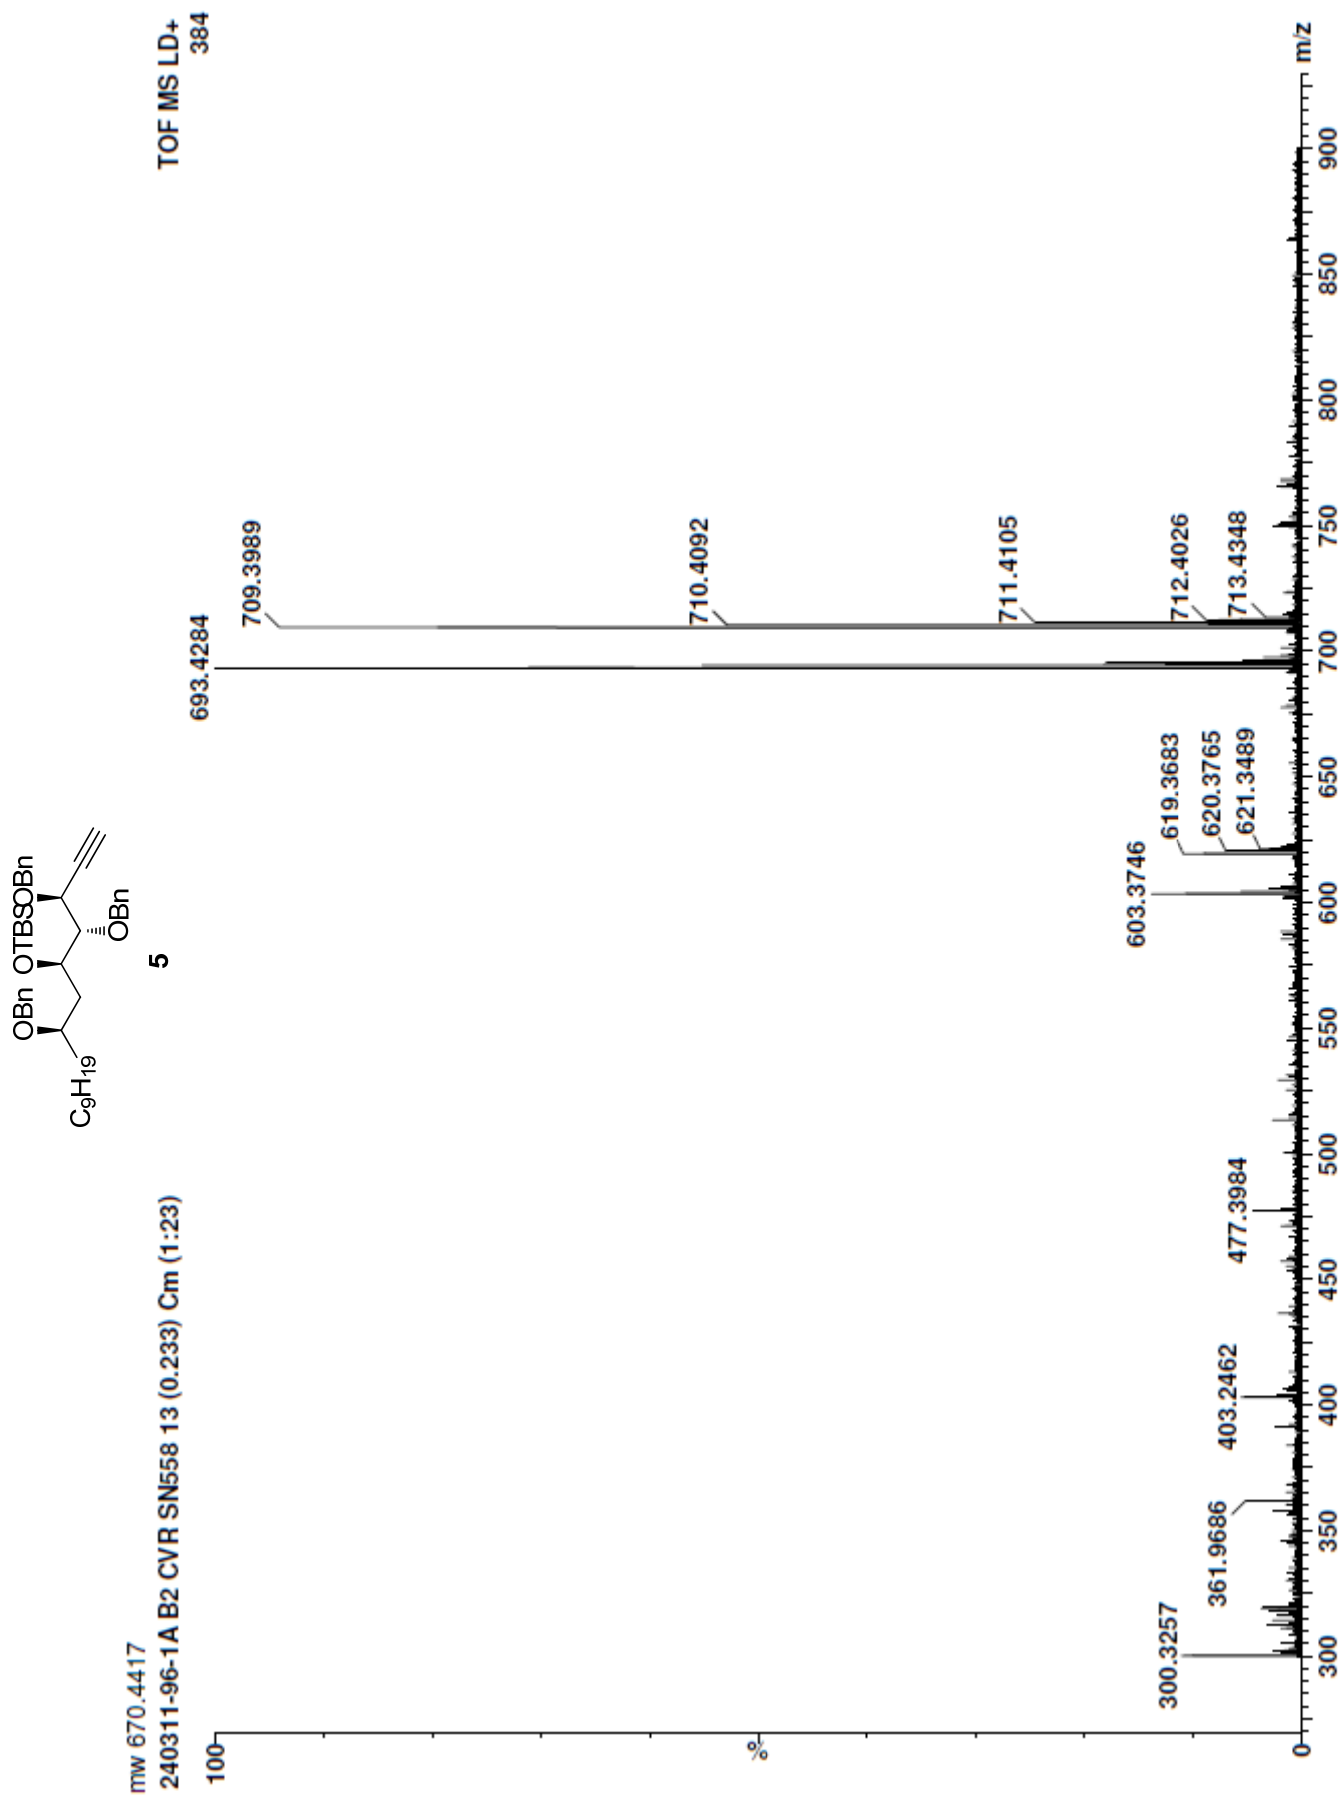

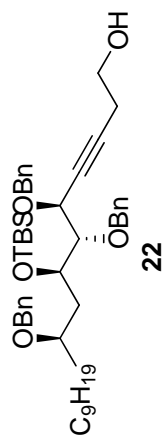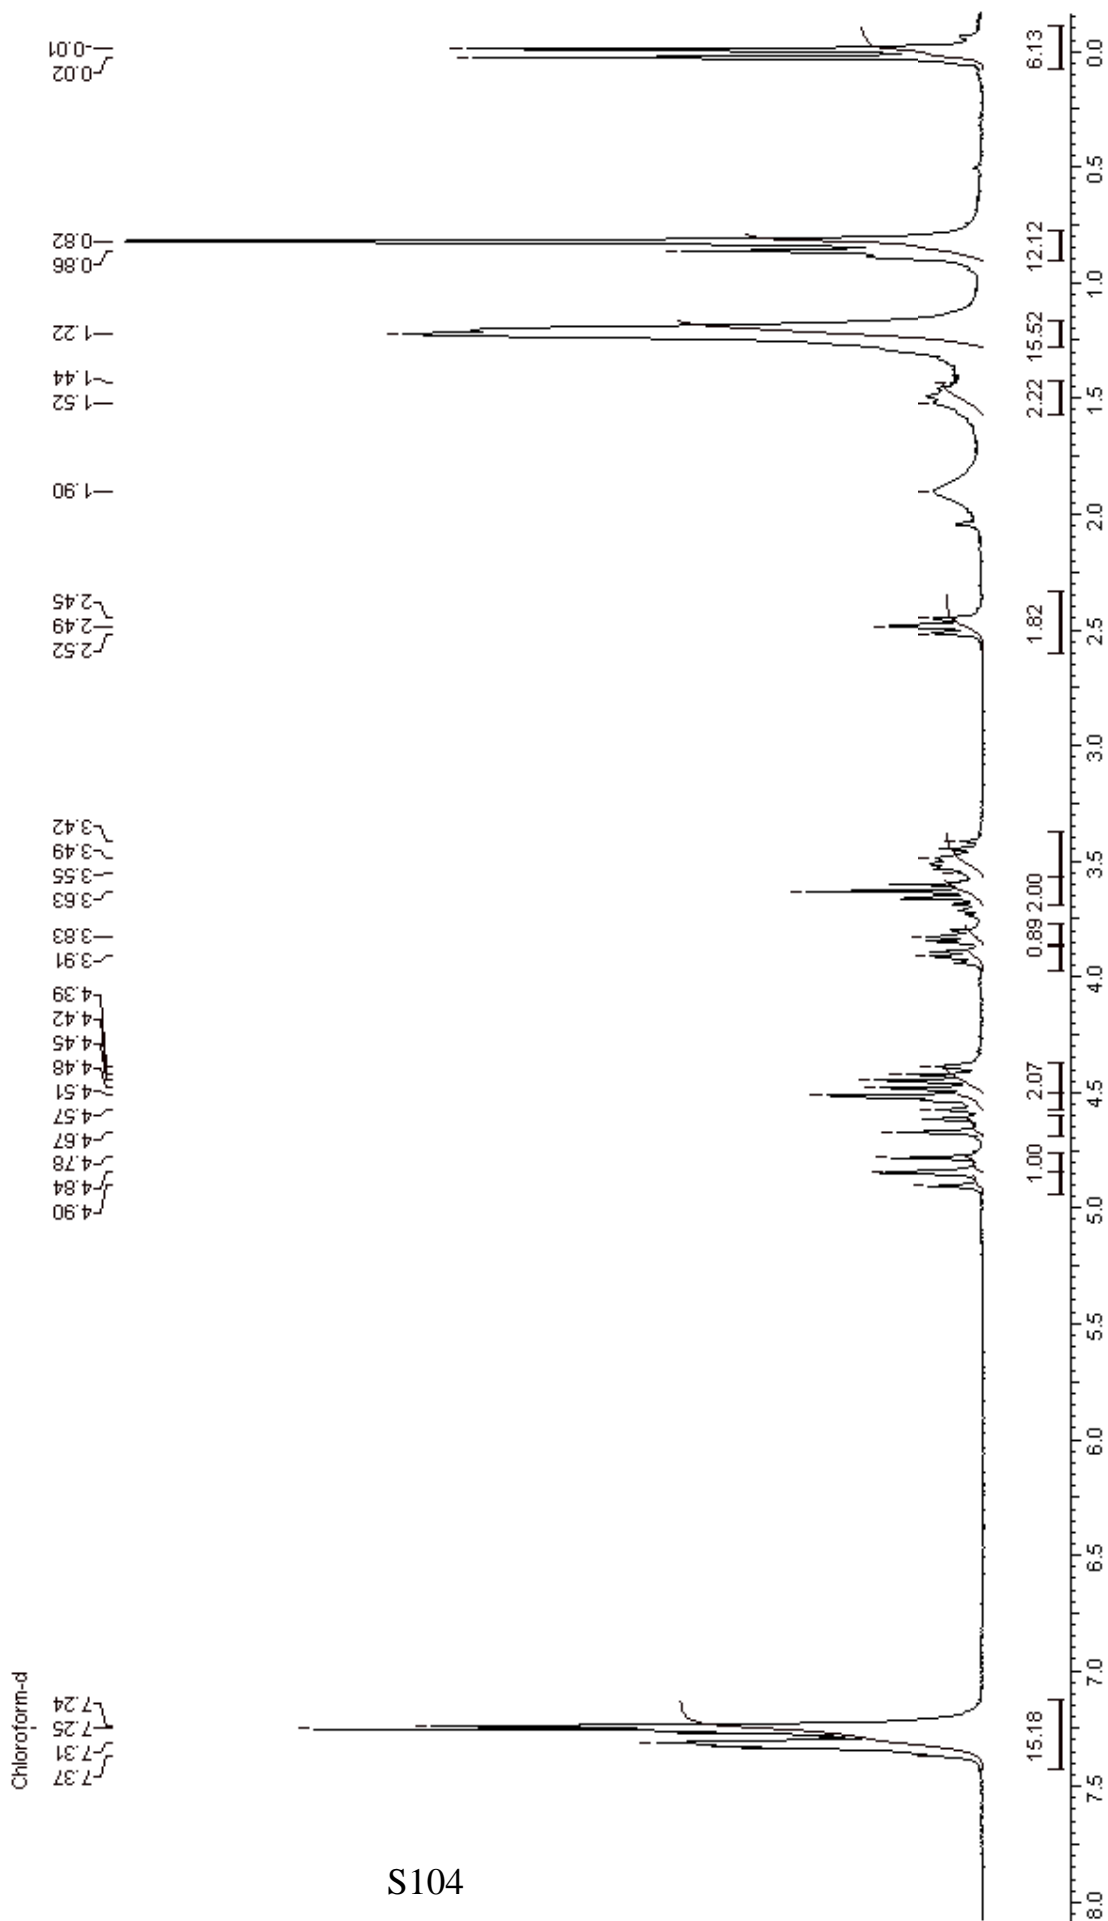

S104



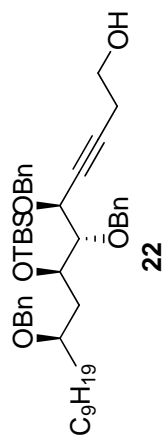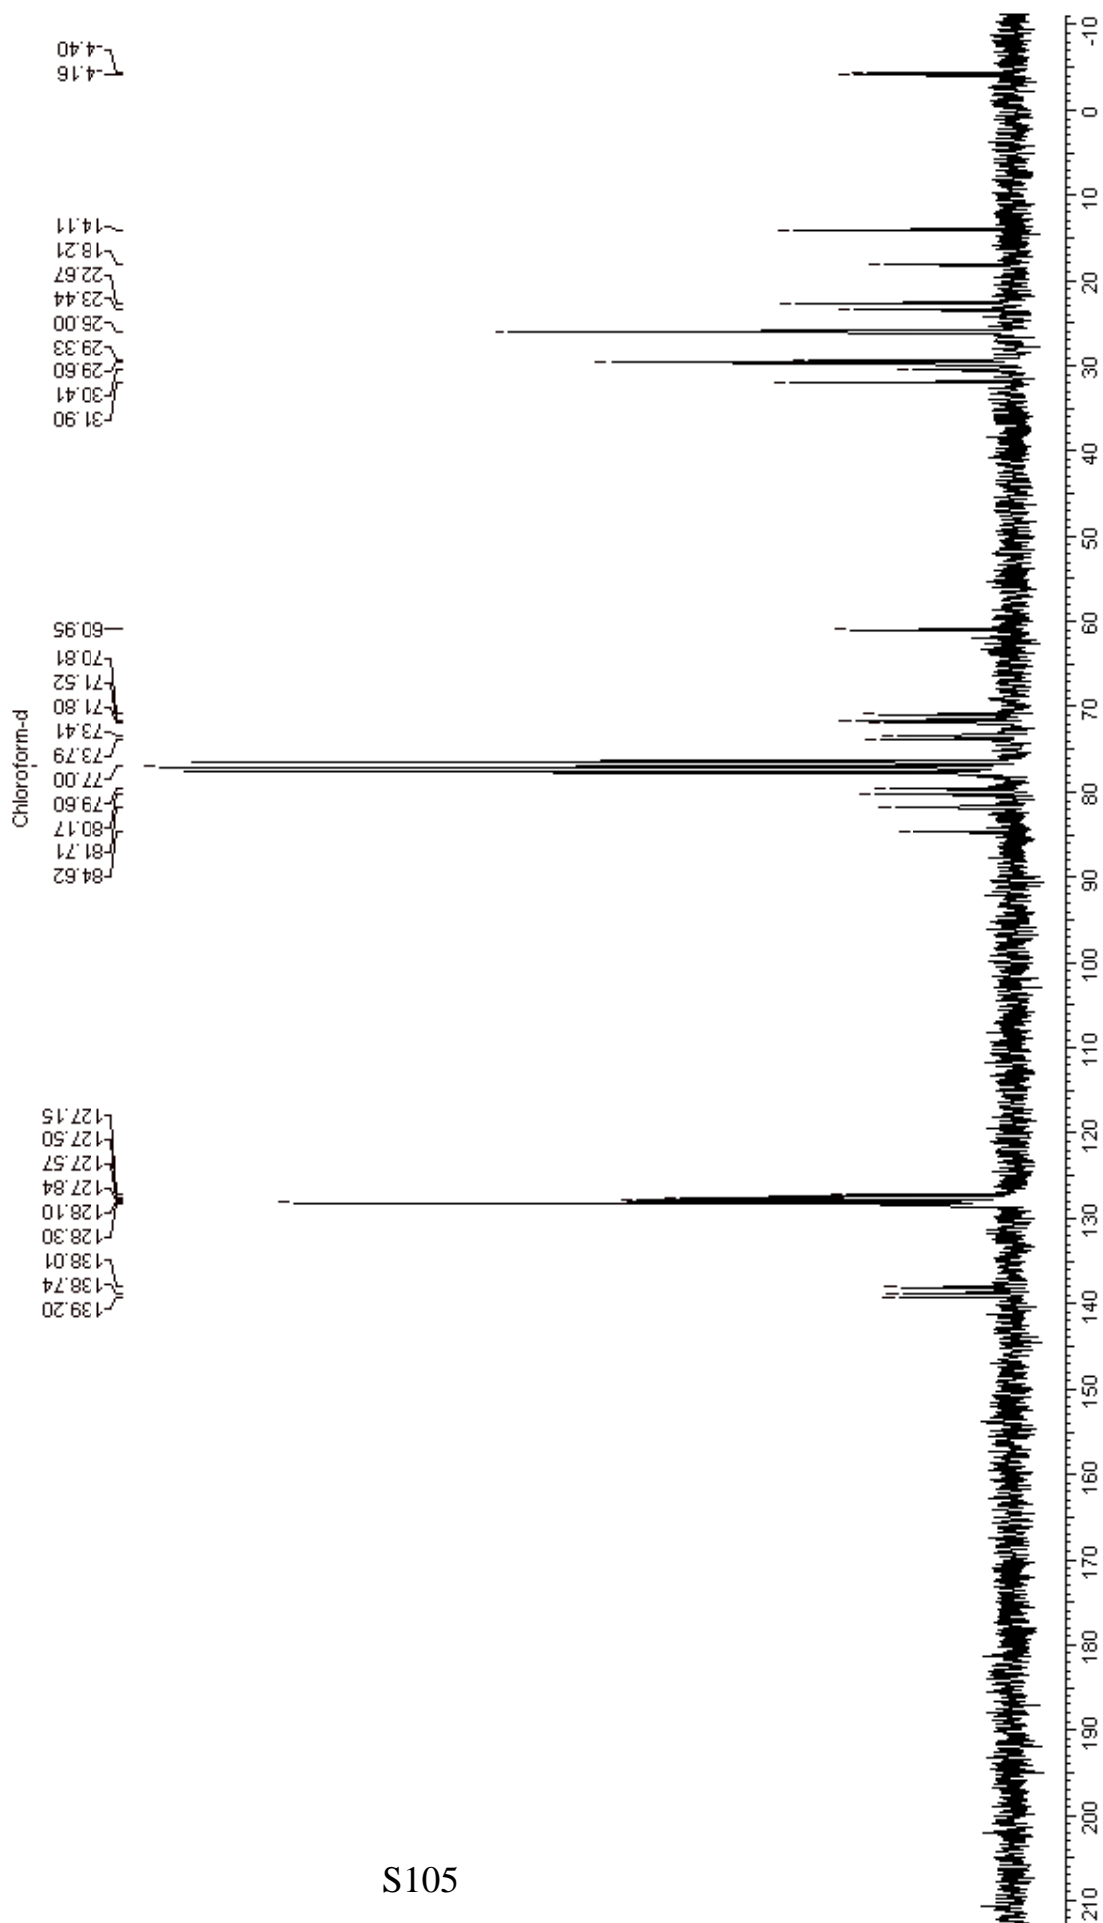

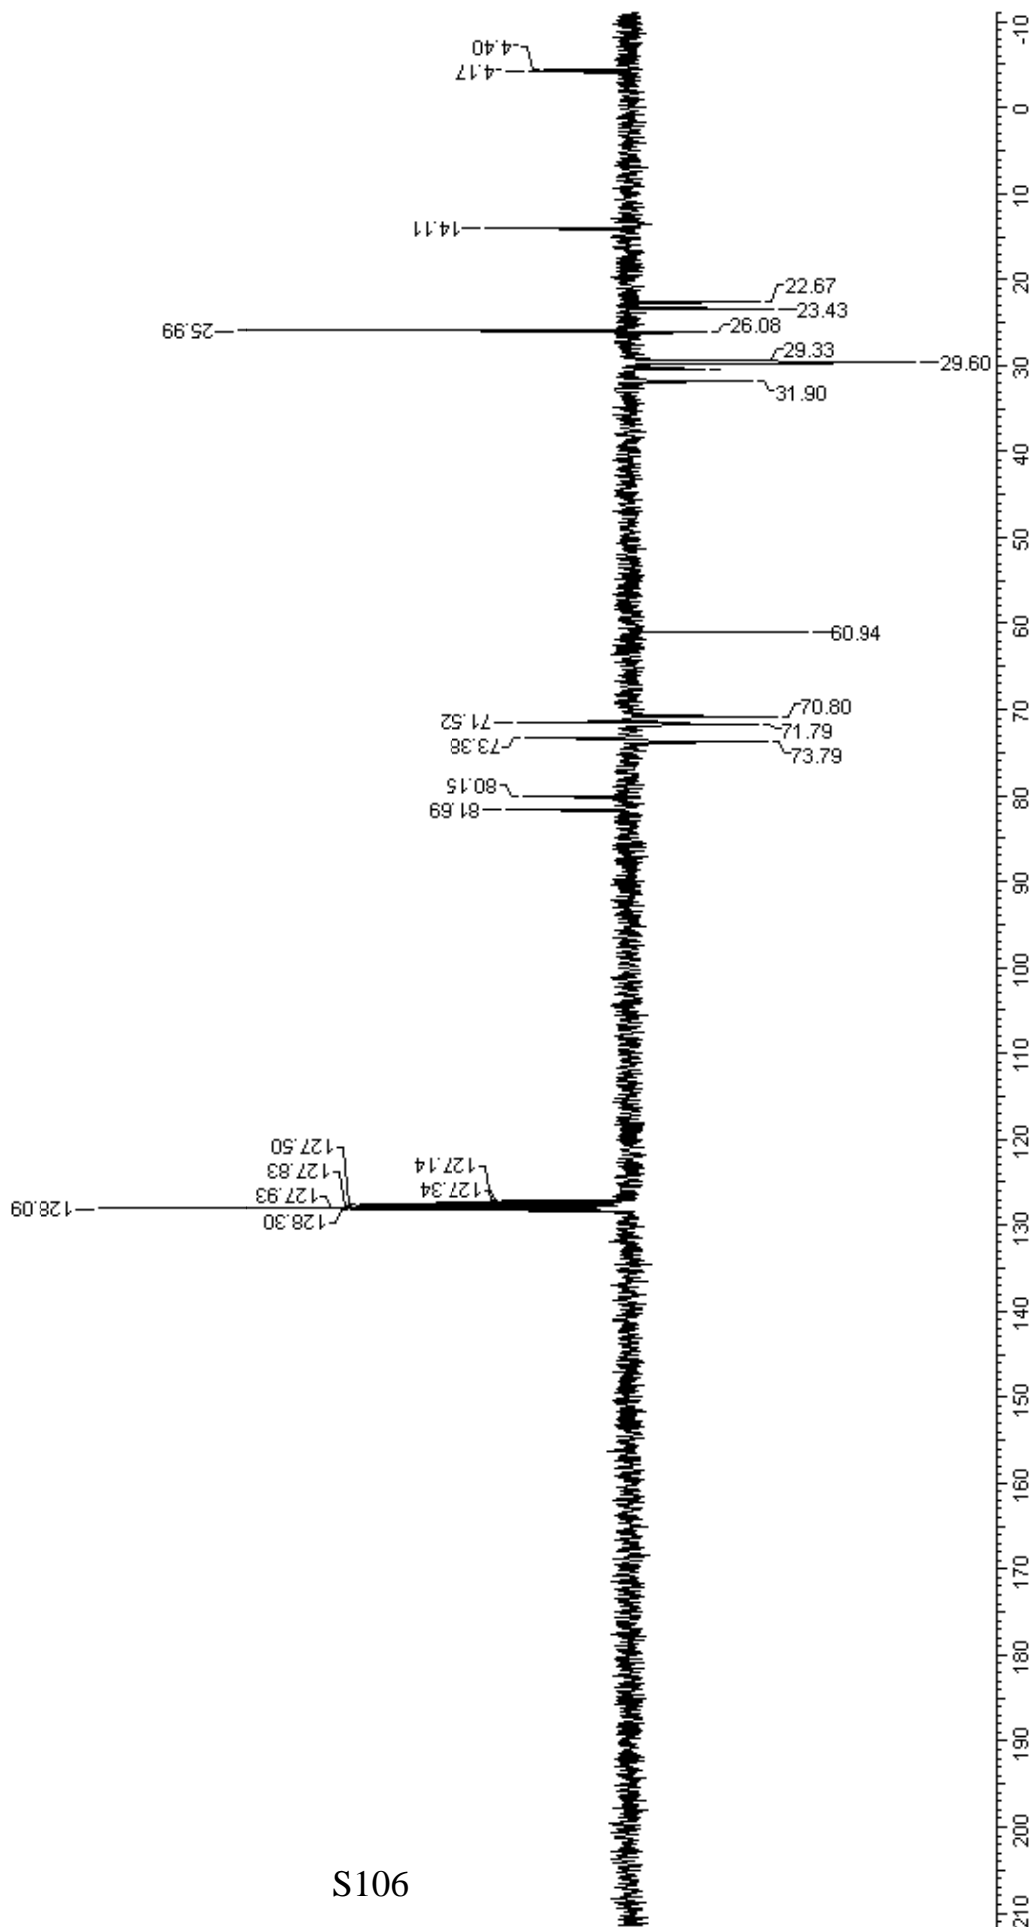

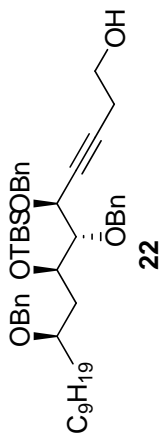

\*LCMSMS - Q STAR PULSAR  
 $[\alpha]_D^{20} = +31.84$   
 $c = 0.9$  in  $CHCl_3$  Actual

+TOF MS: 0.033 to 0.334 min from NCK.wiff  
 a=3.39693261155446460e-004, 10=-3.24358683266109440e+001

Max. 771.8 counts.

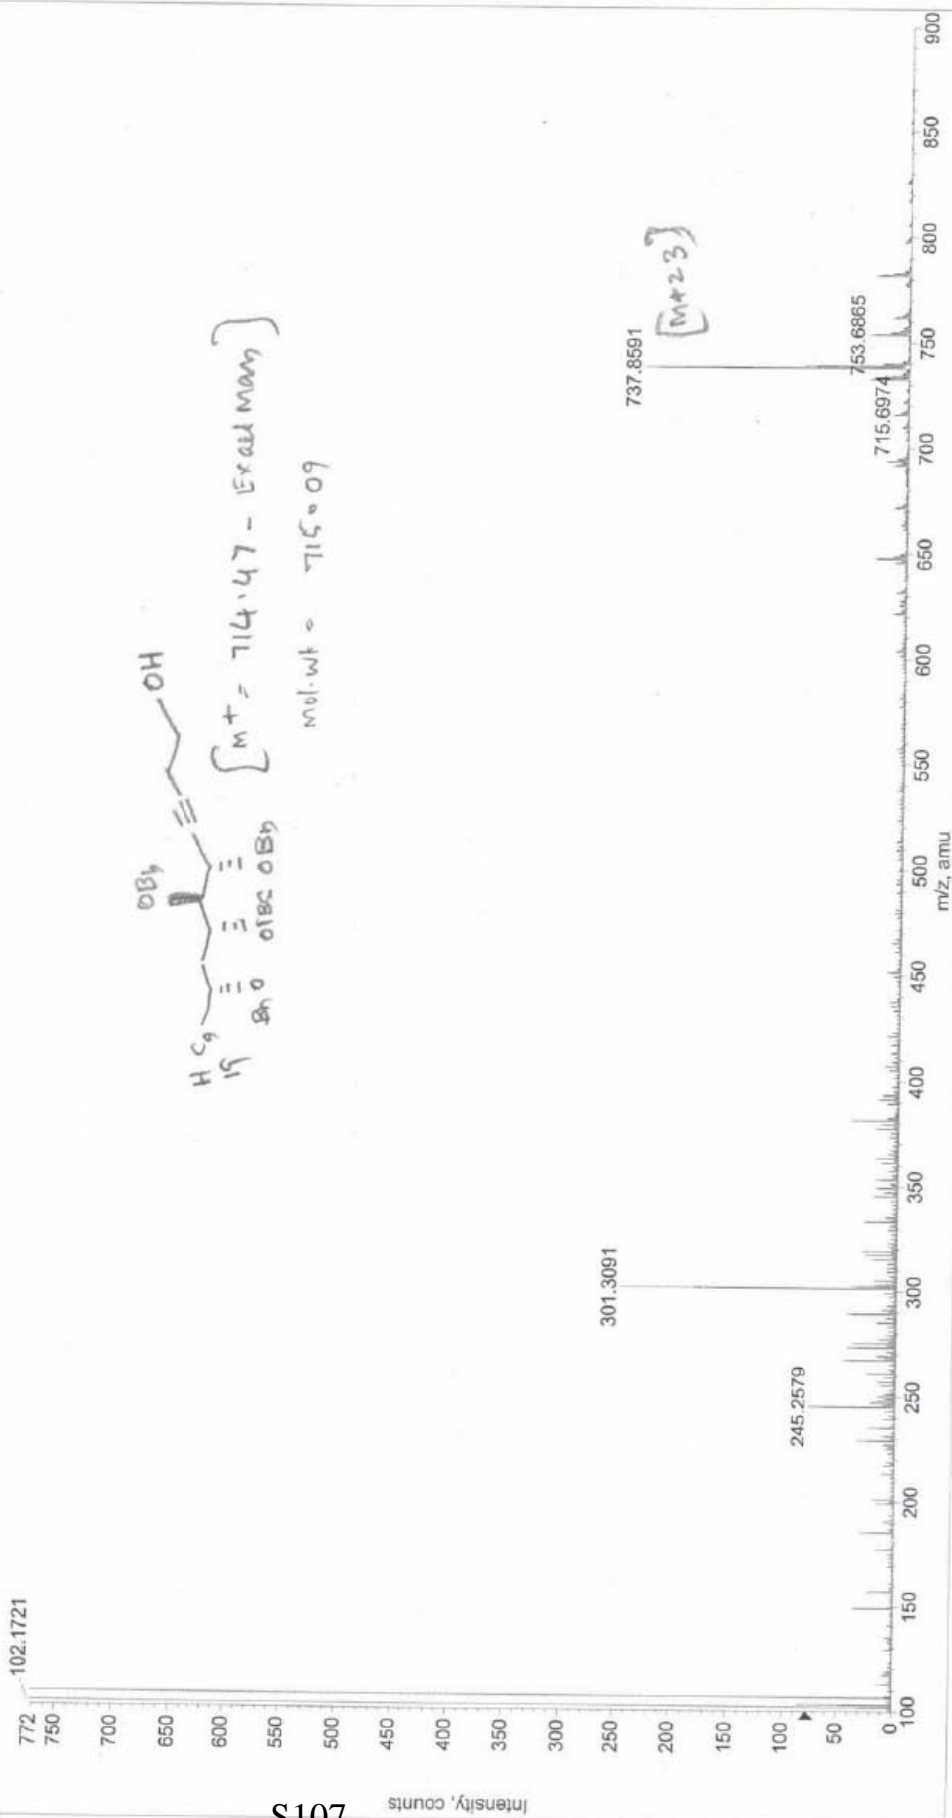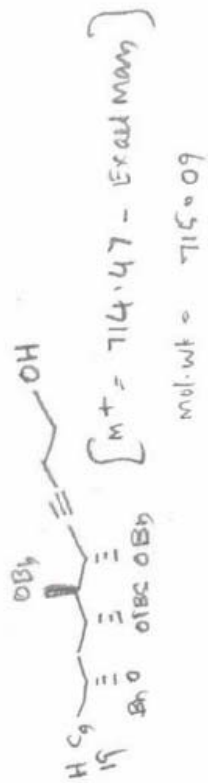

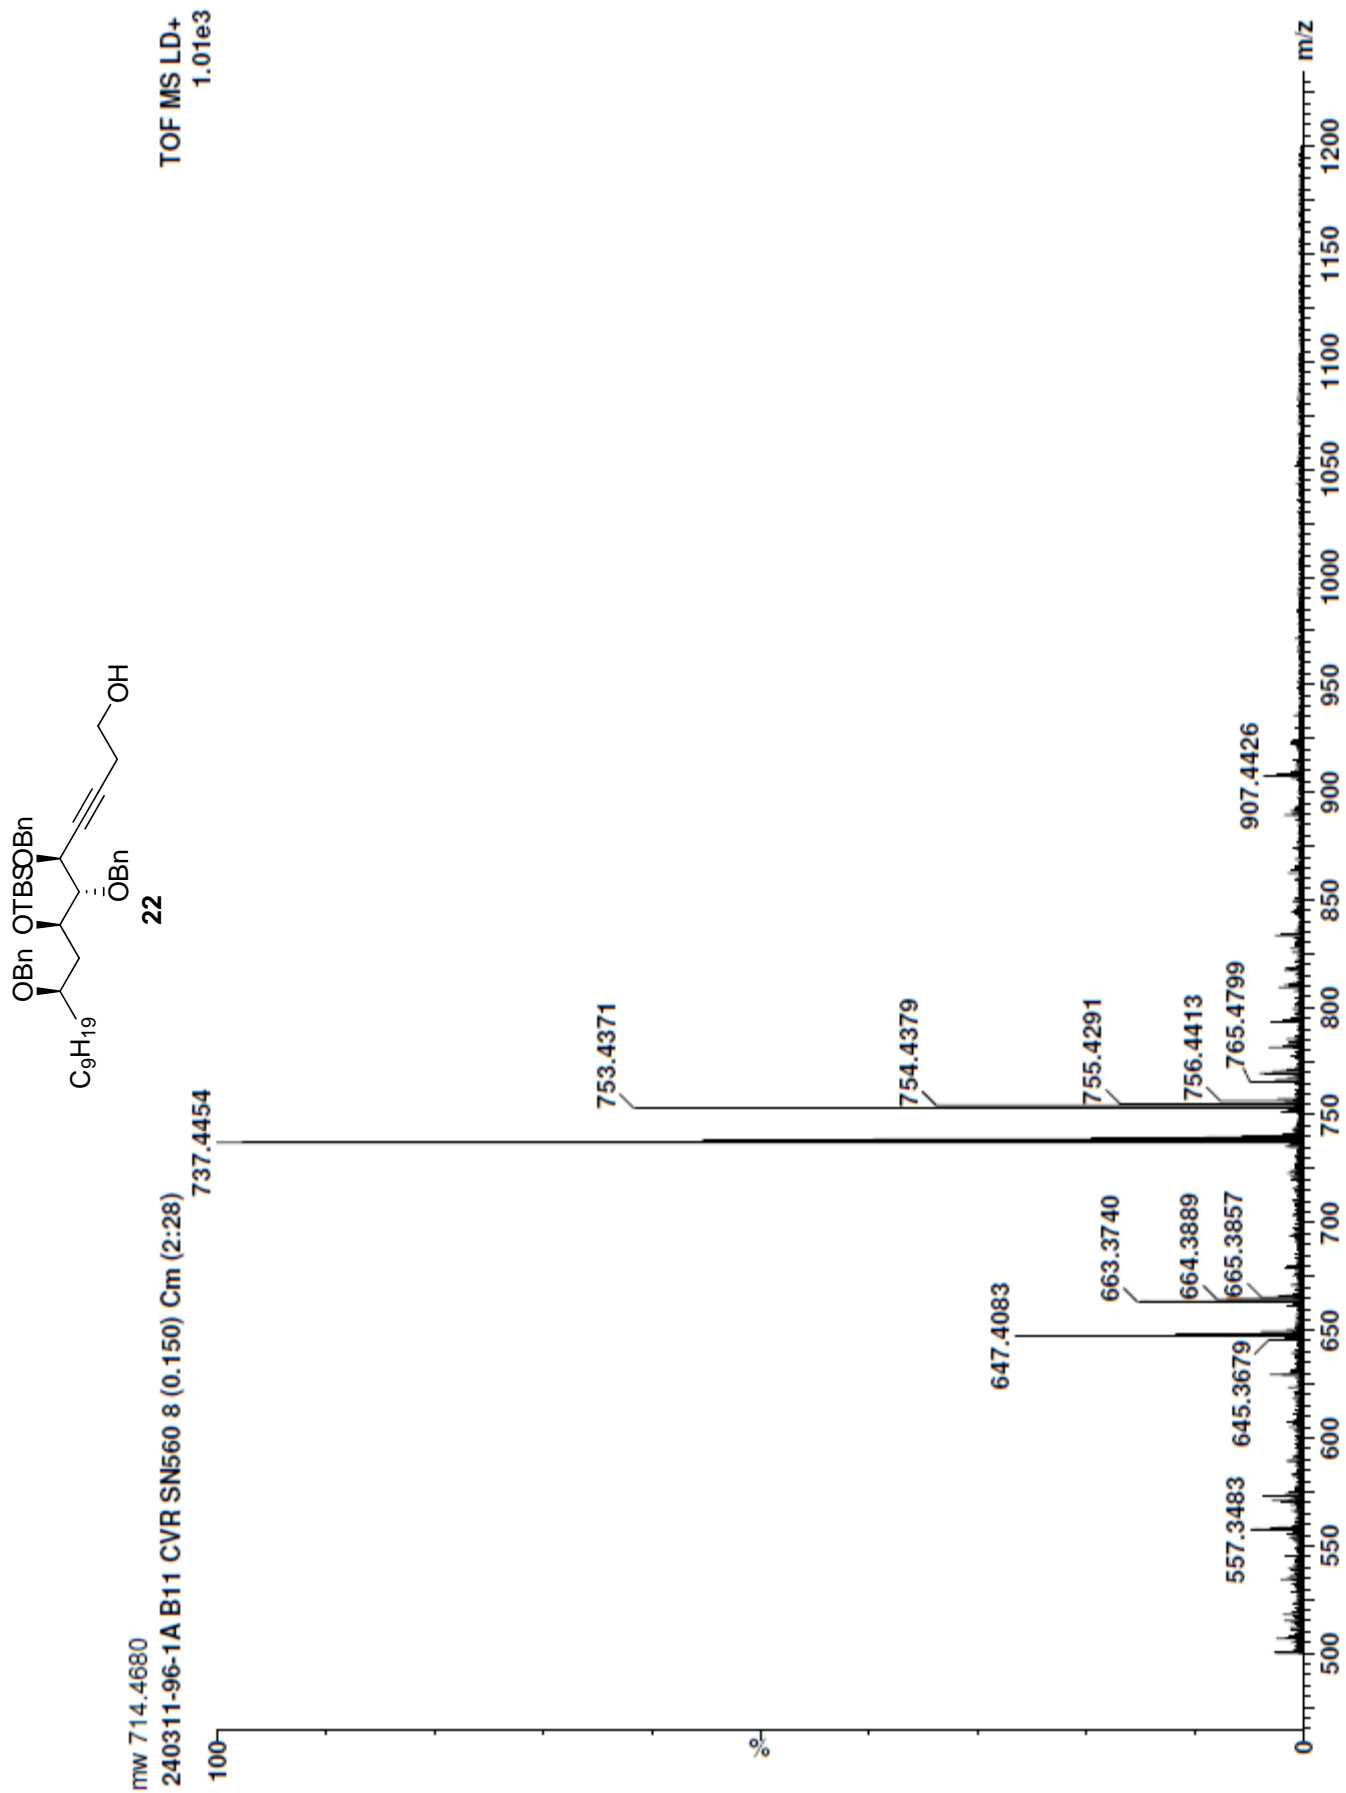

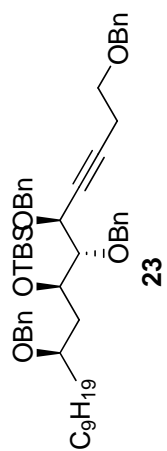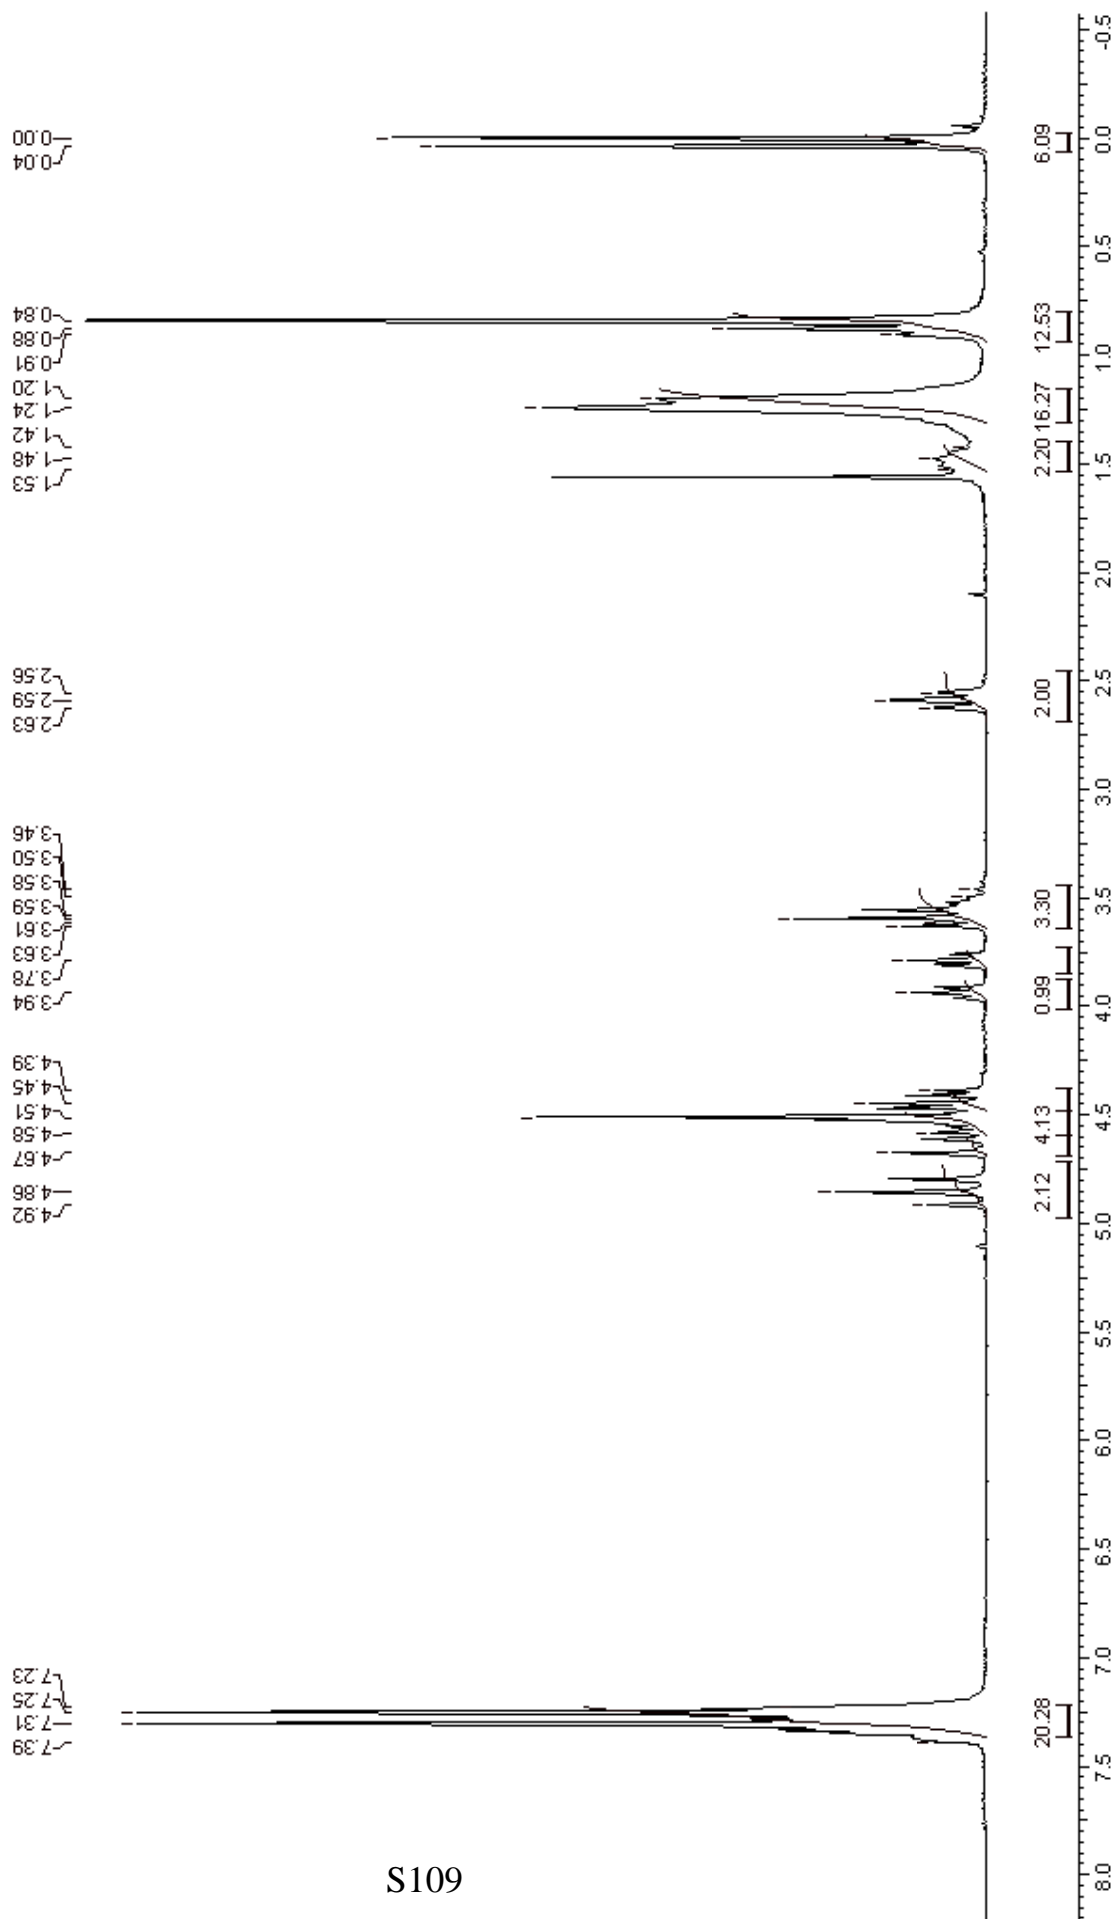

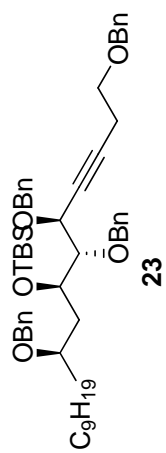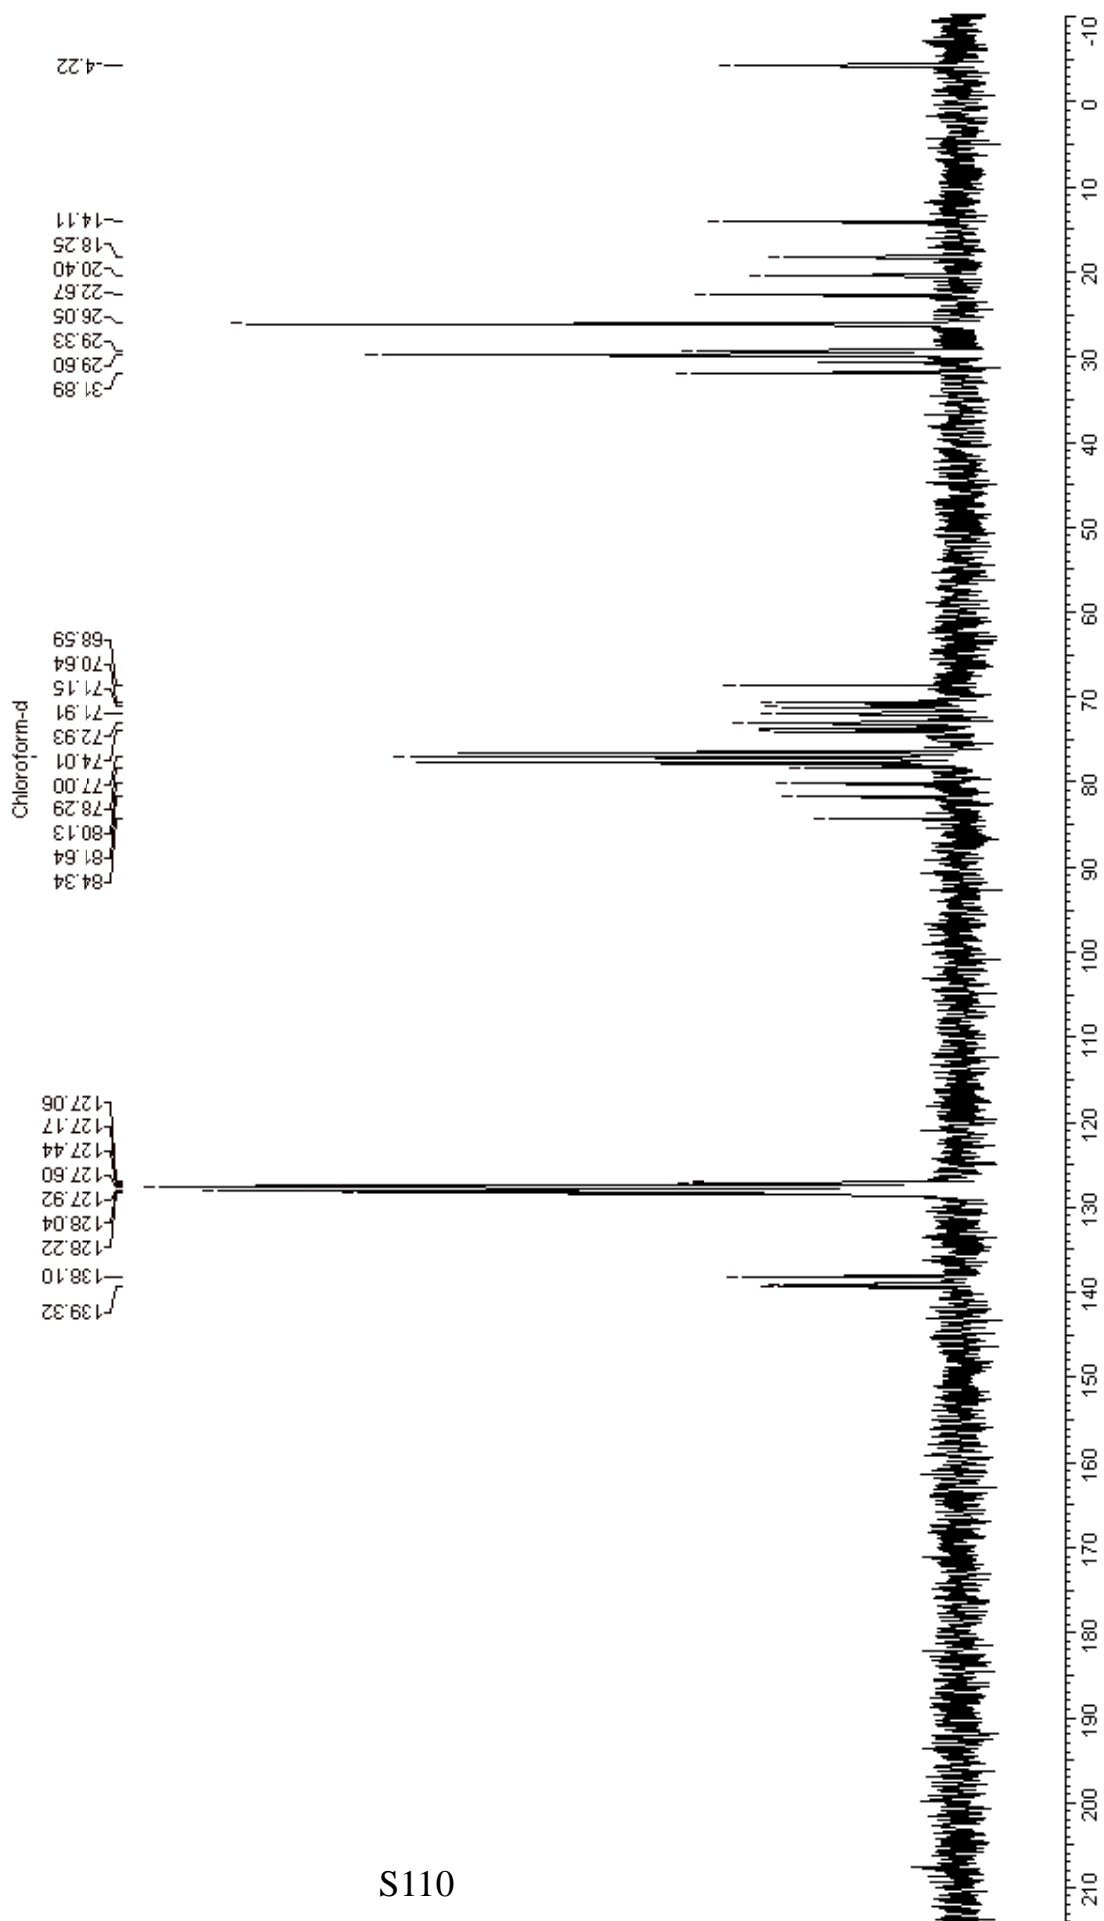

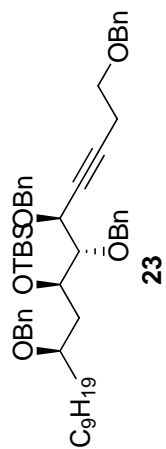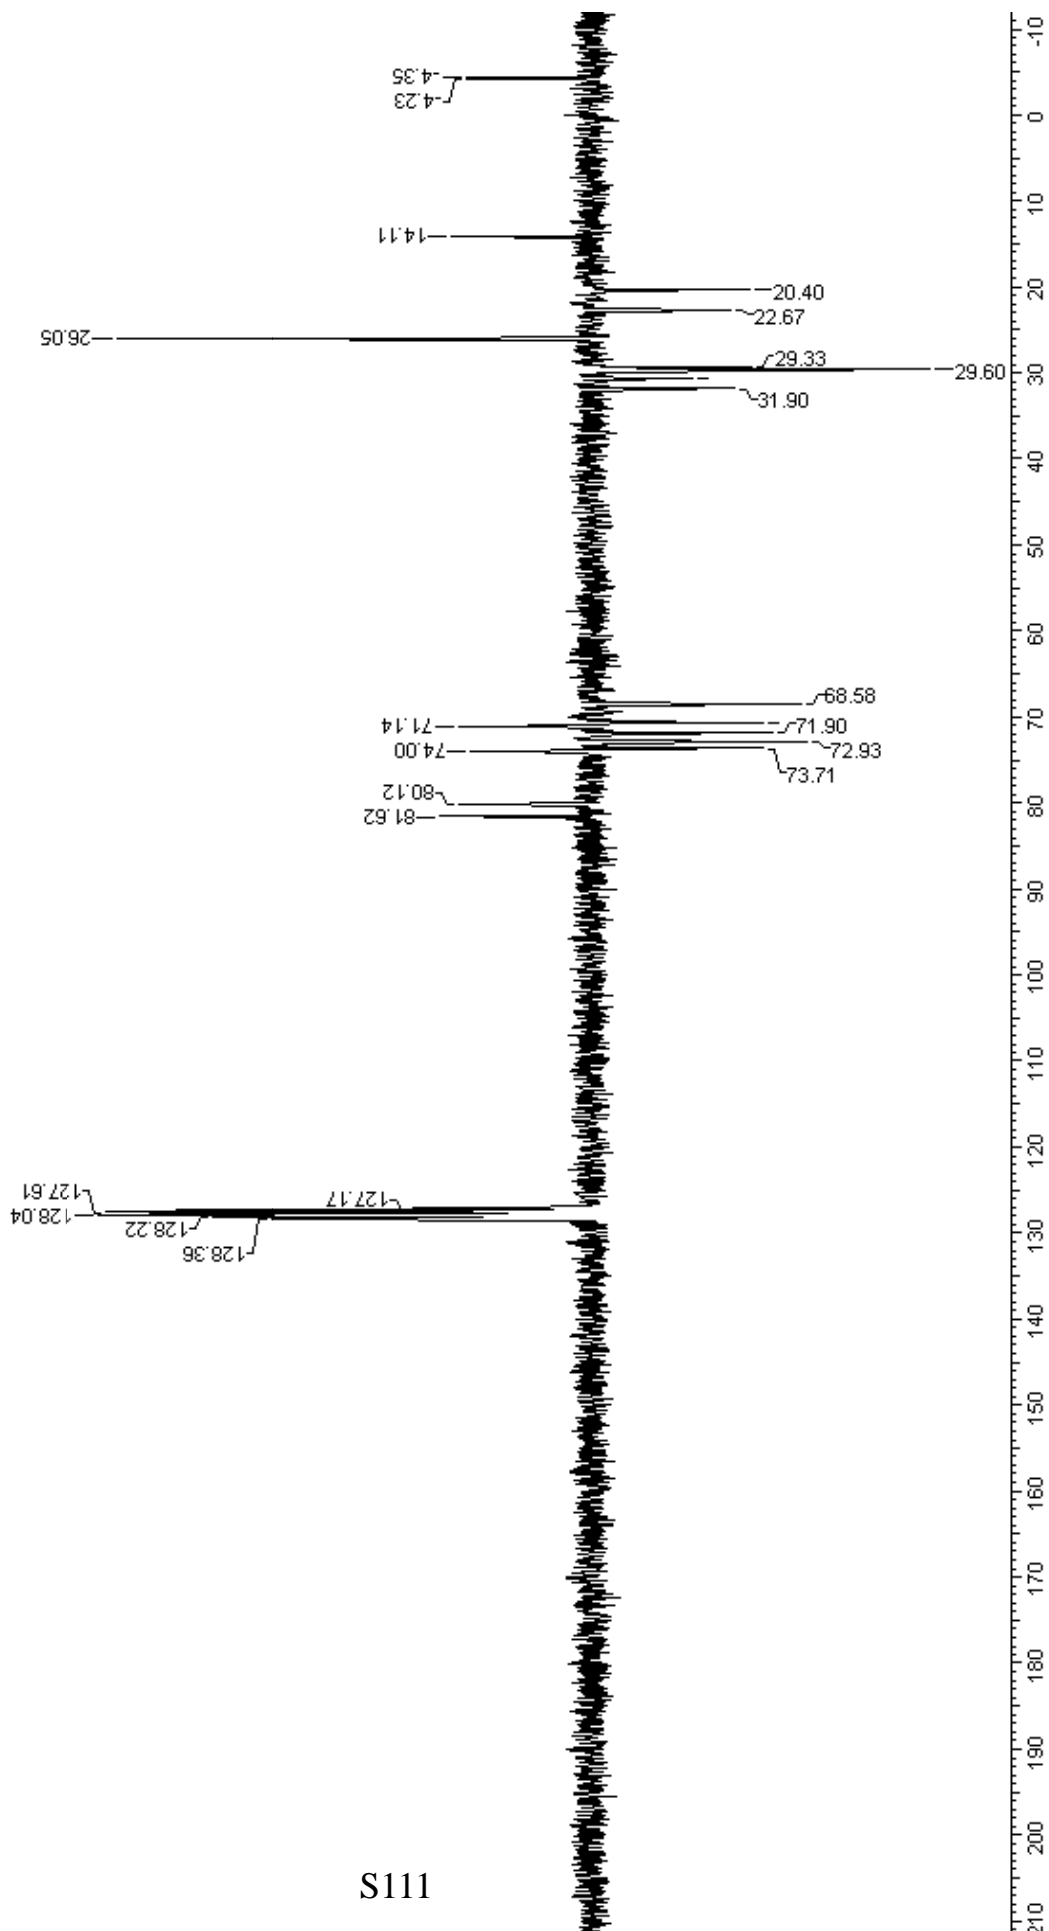

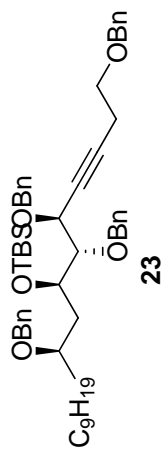

\*LCMSMS - Q STAR PULSAR

+TOF MS: 0.050 to 0.334 min from BIV-4.wiff  
a=3.39267369403760210e-004, t0=-3.24358683266109440e+001 R;

Max. 4.2 counts

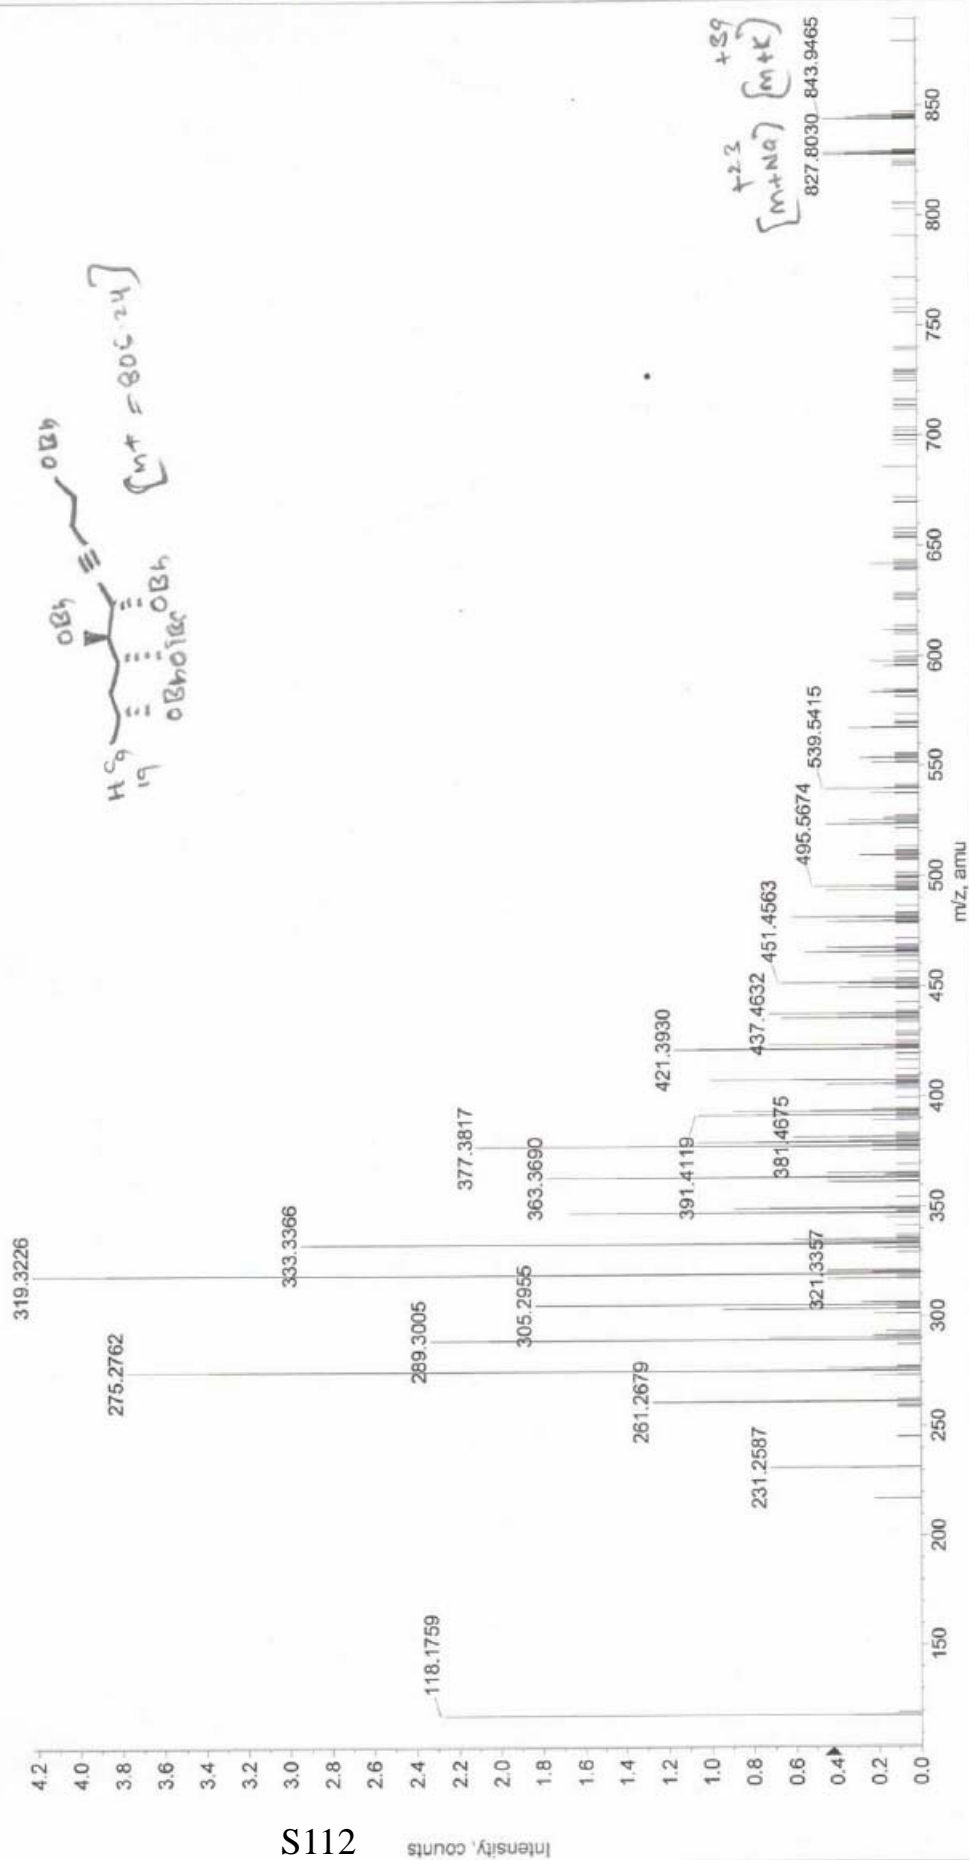



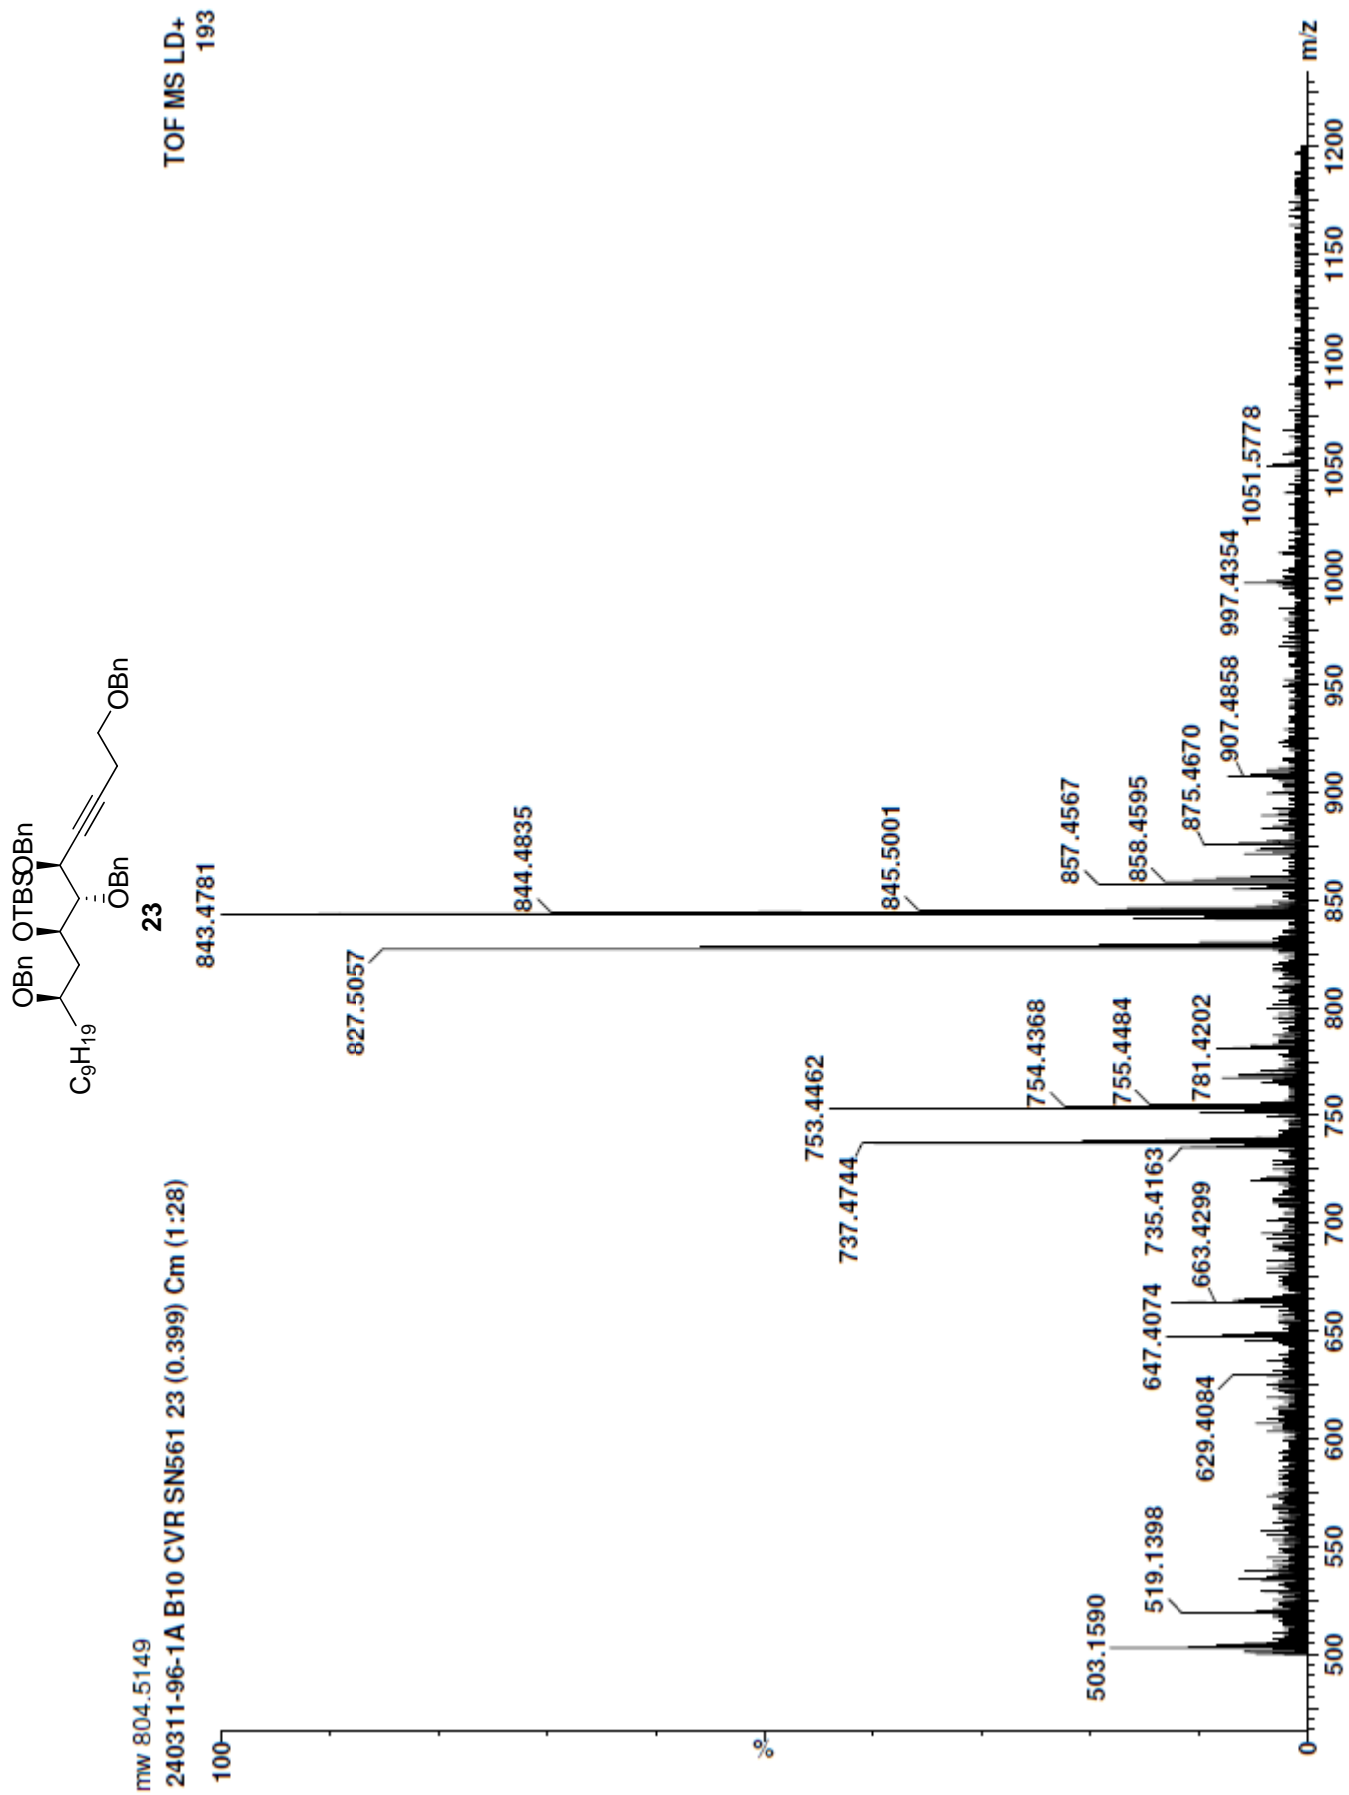

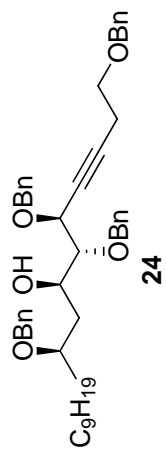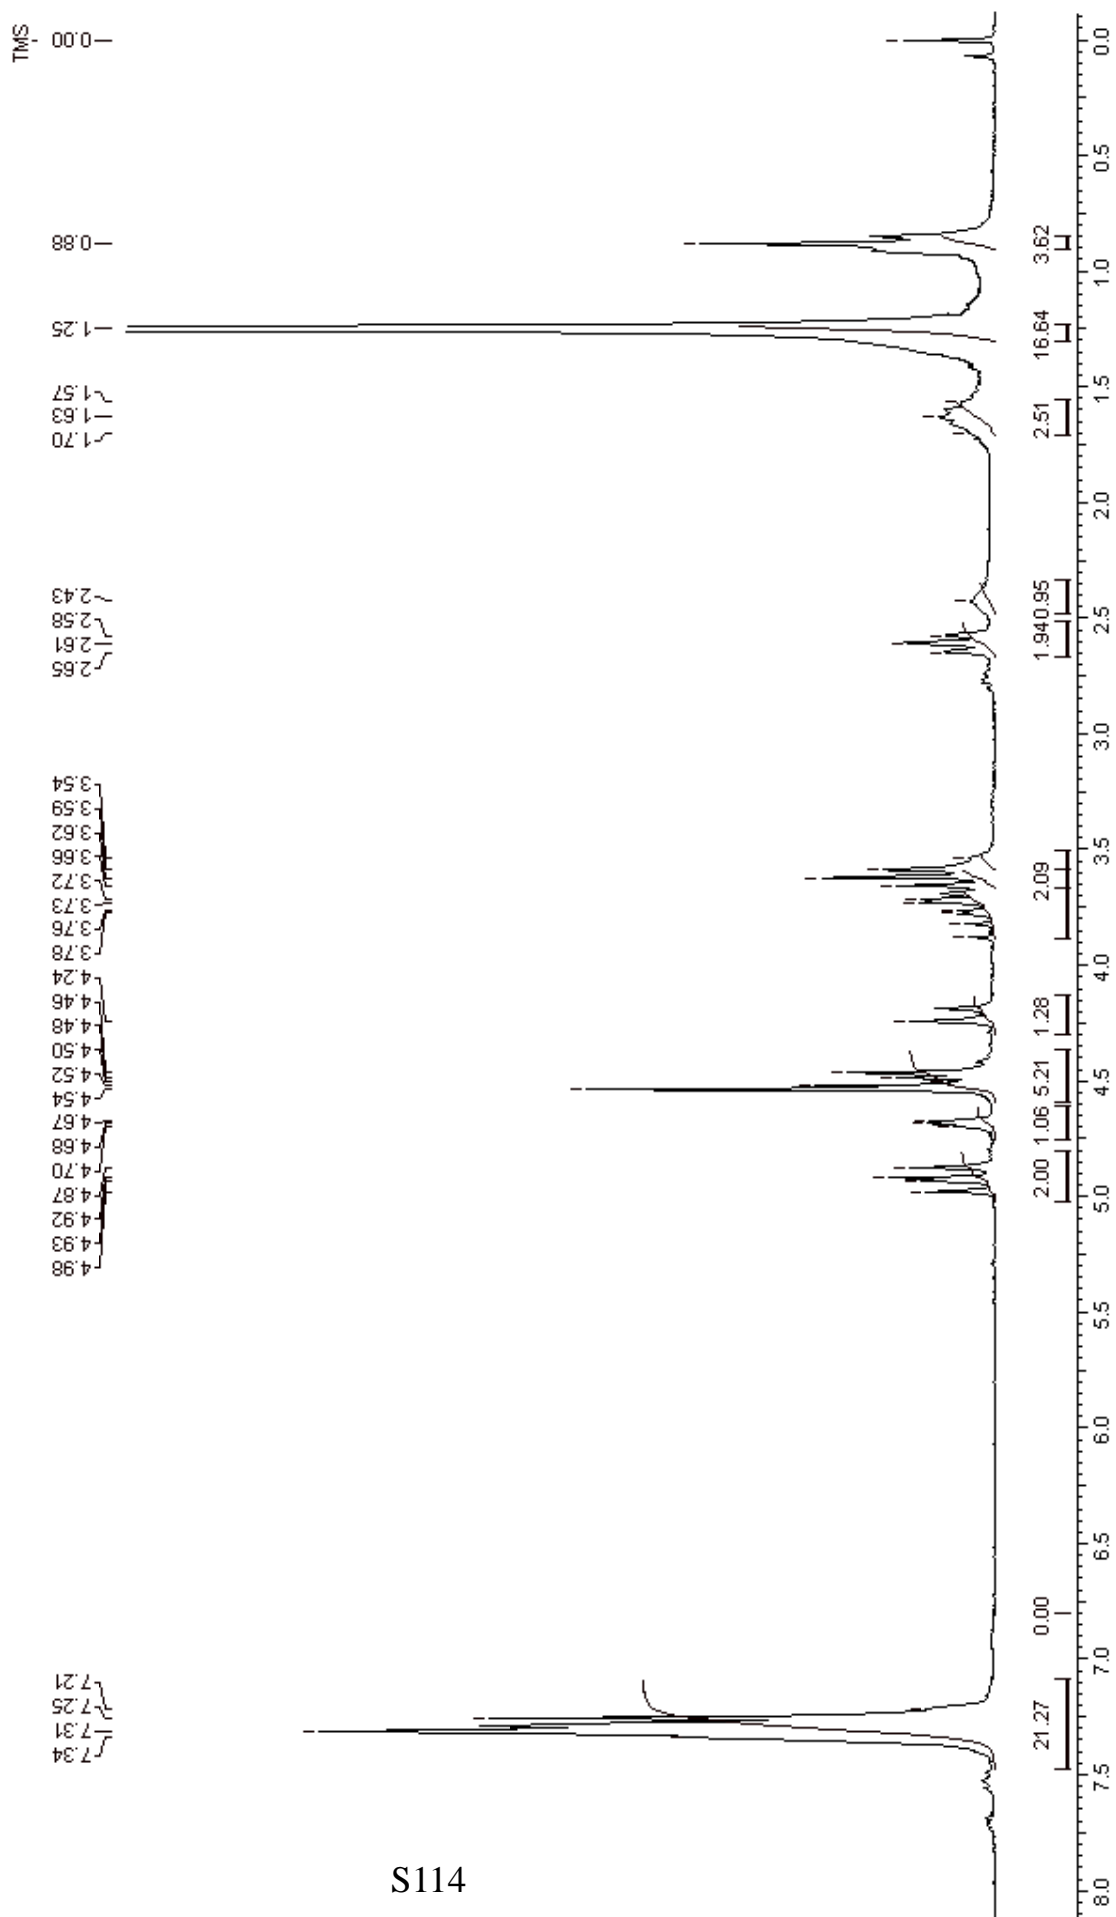

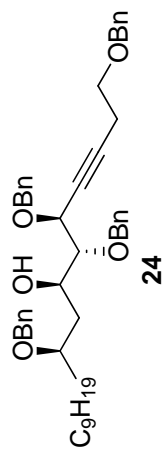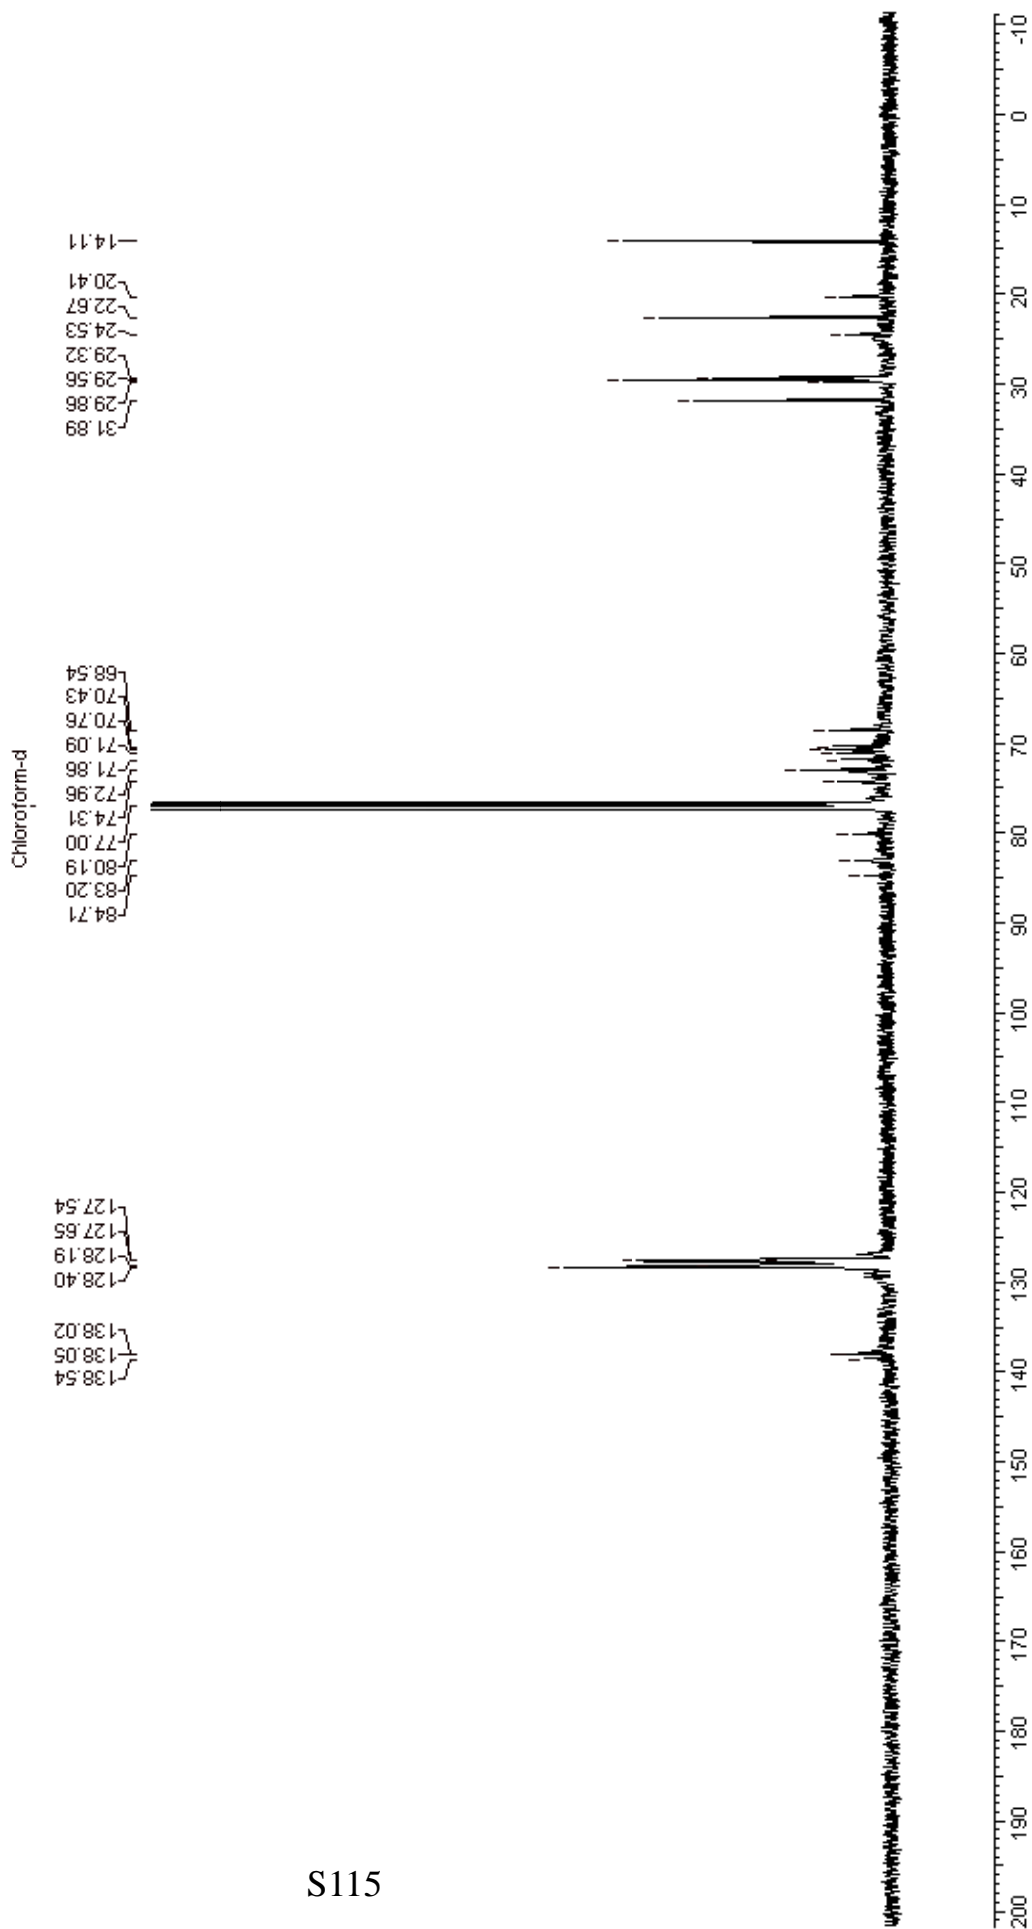

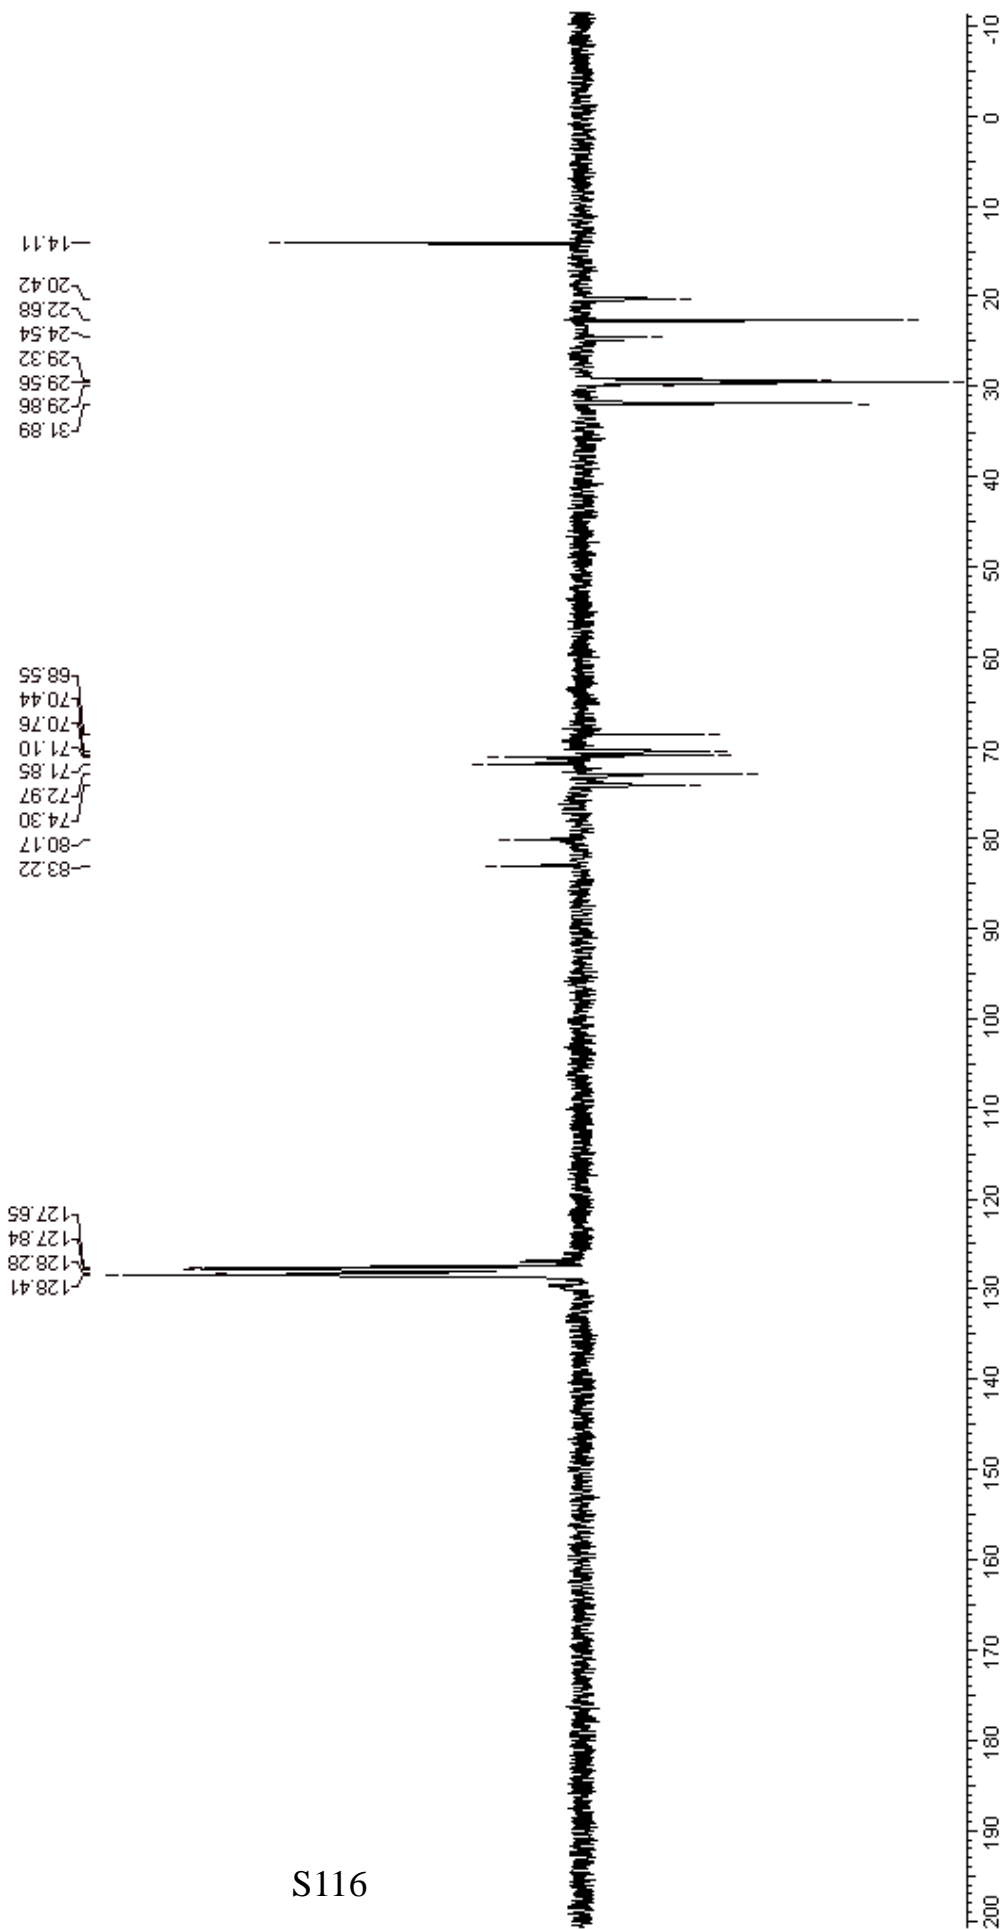

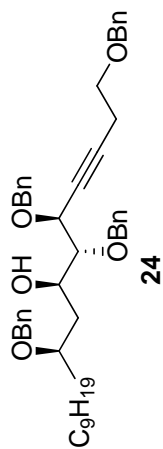

\*LCMSMS - Q STAR PULSAR

+TOF MS: 0.017 to 0.283 min from 3.wiff  
a=3.39114604752036810e-004, t0=-3.24358683266109440e+001

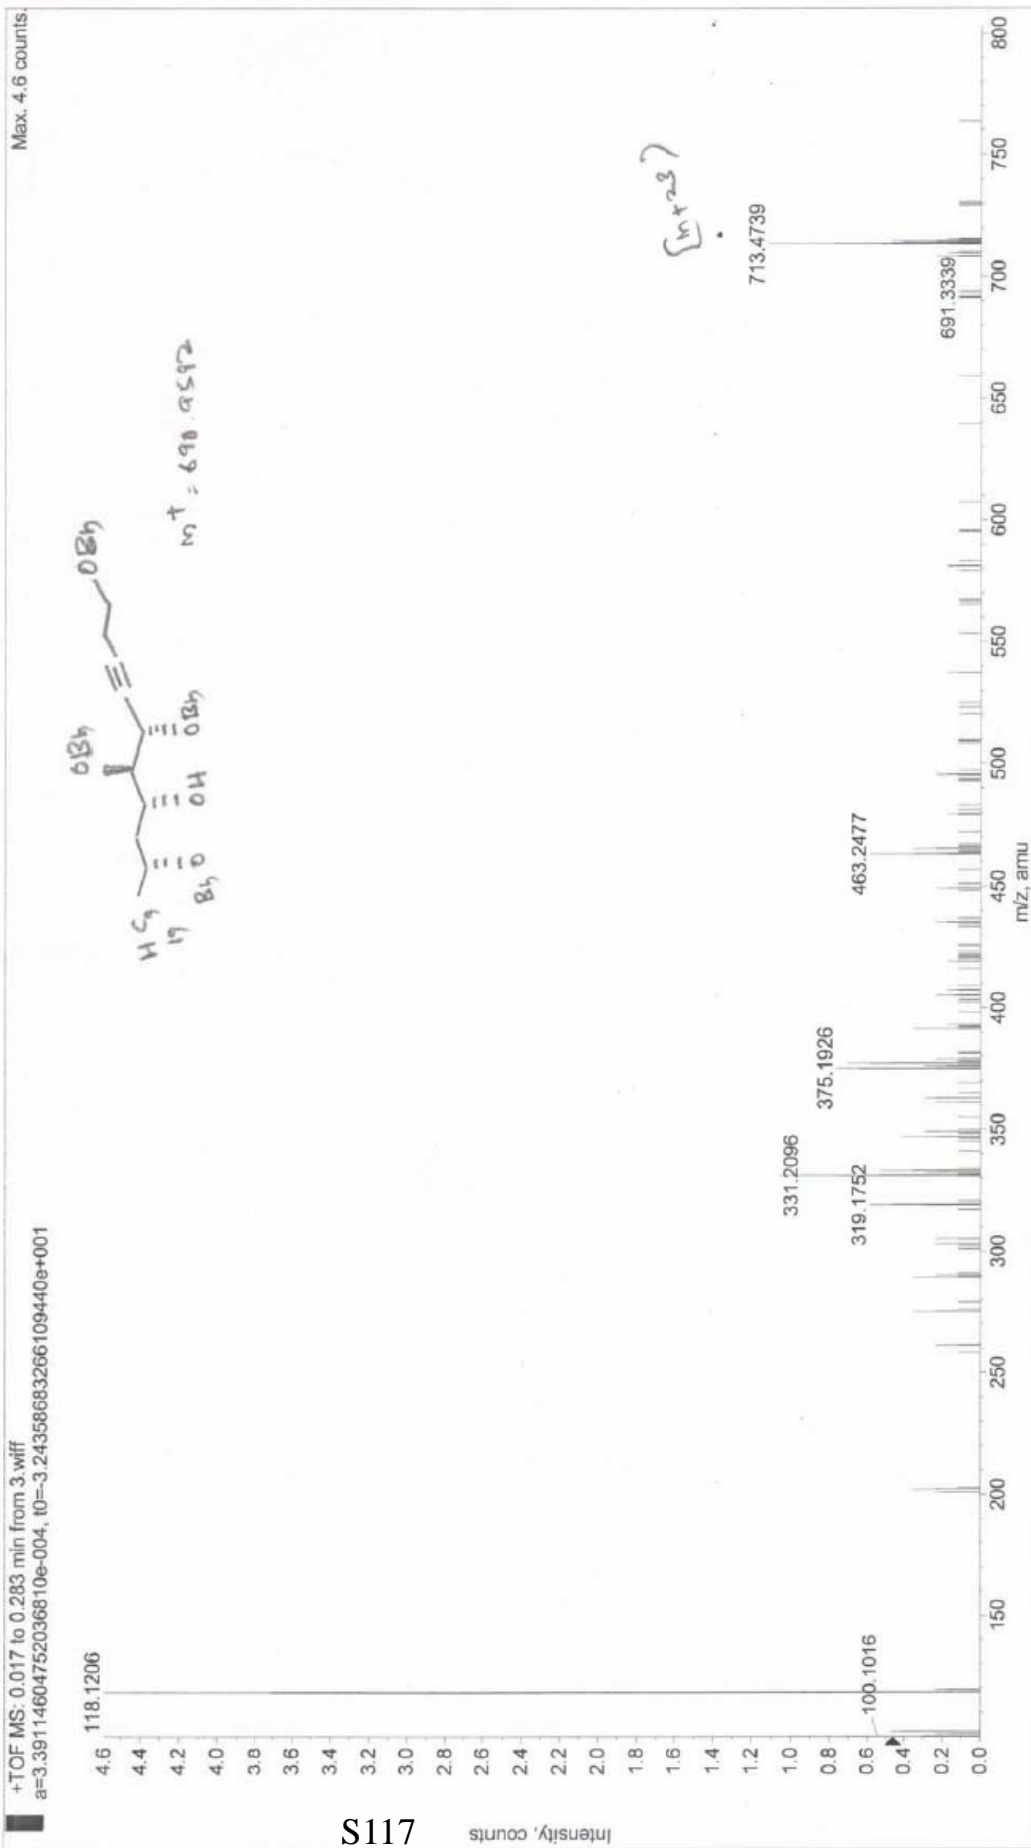

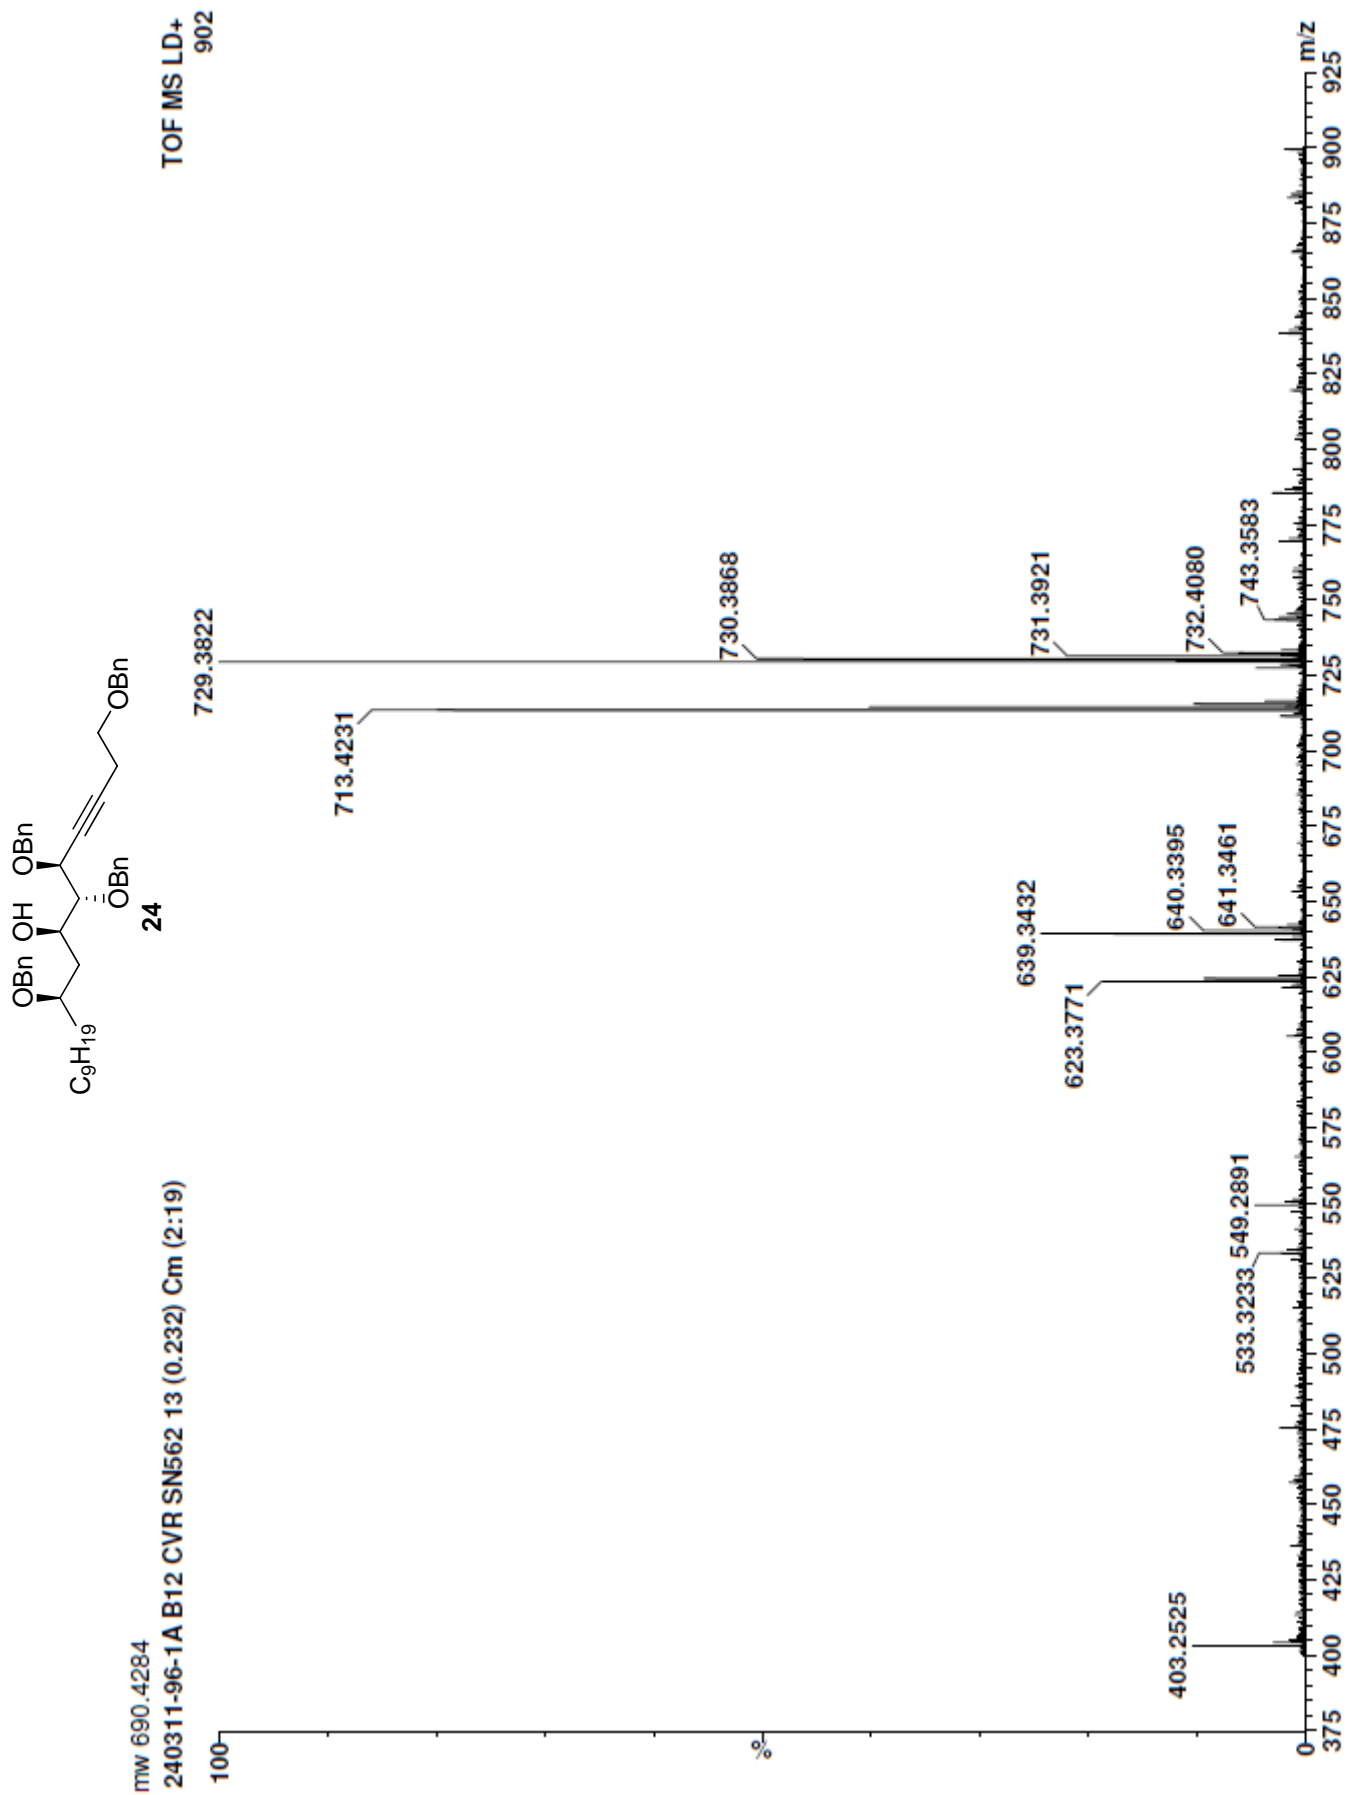

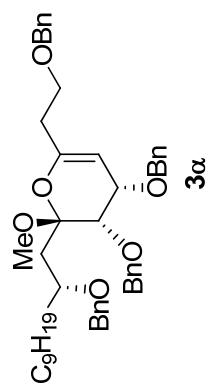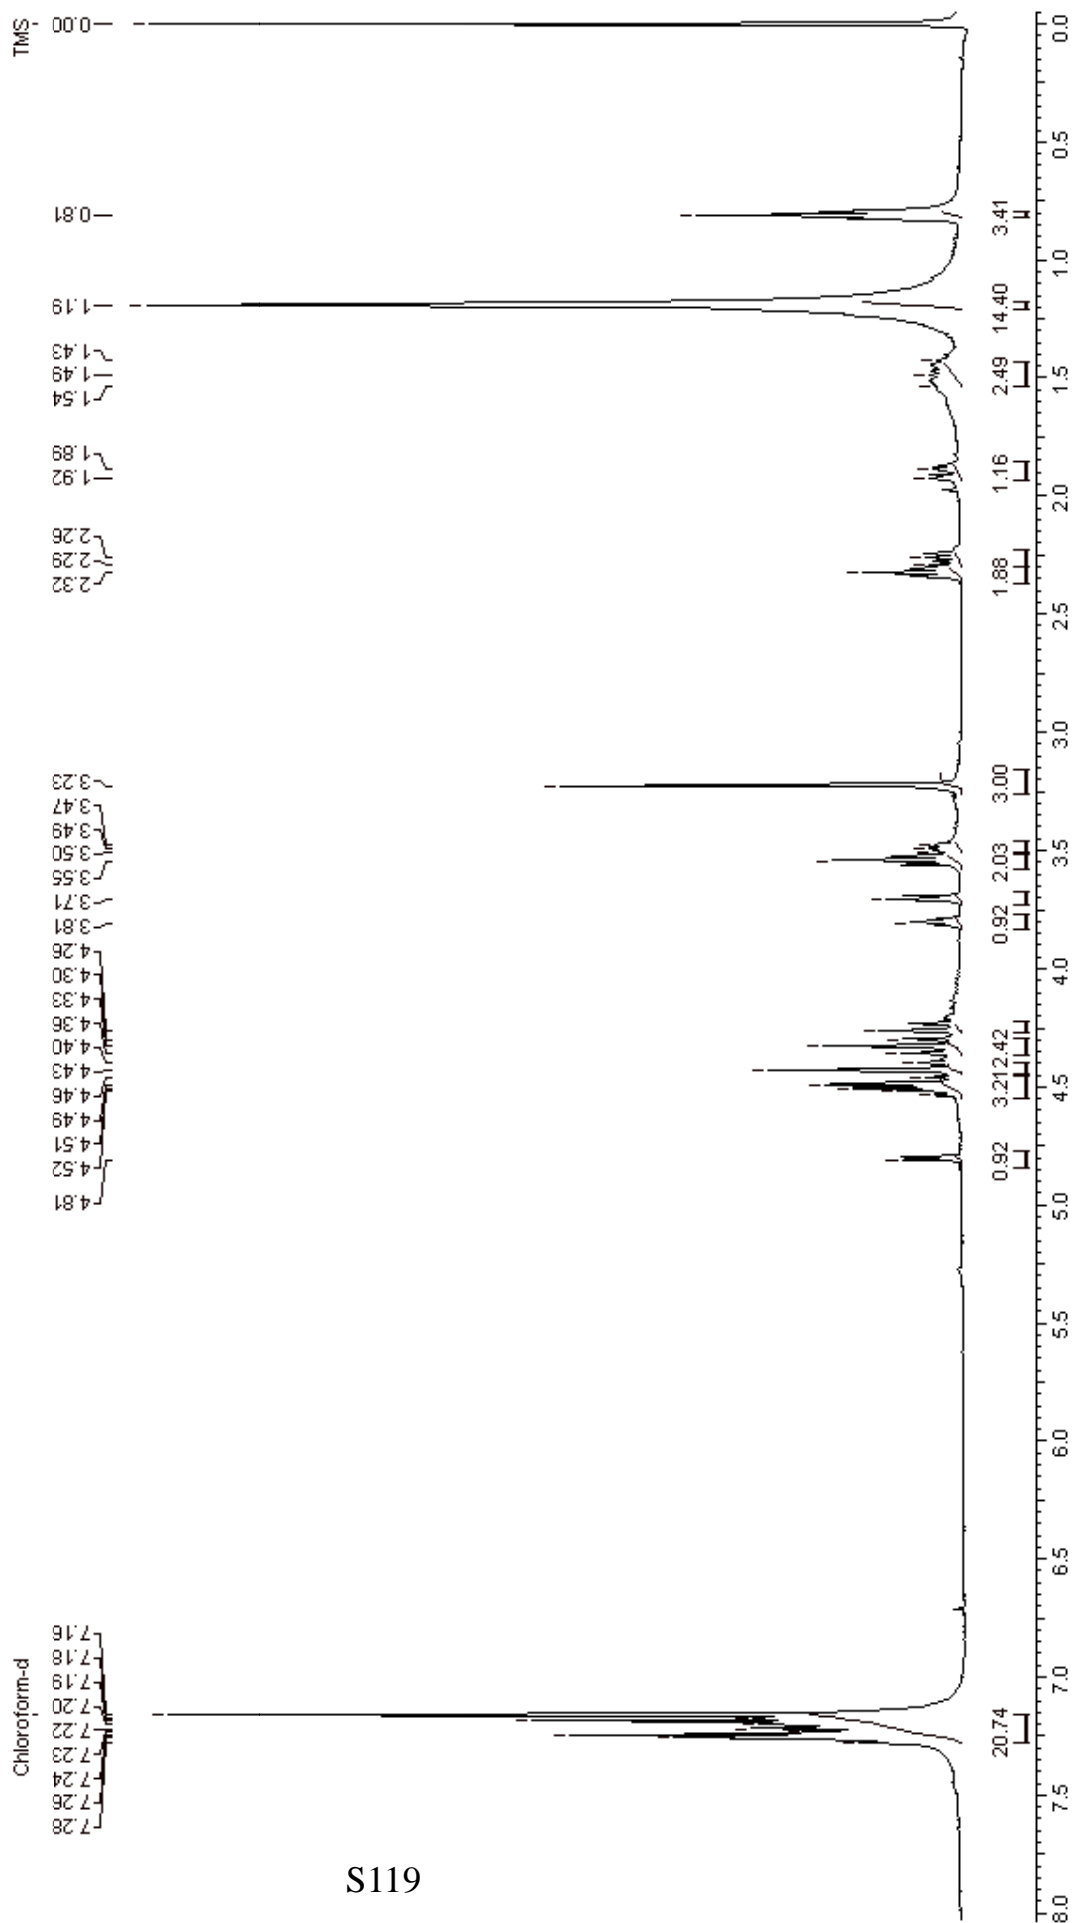

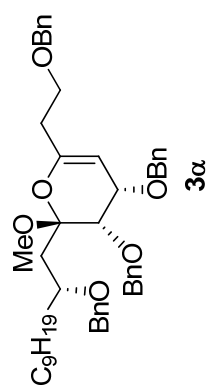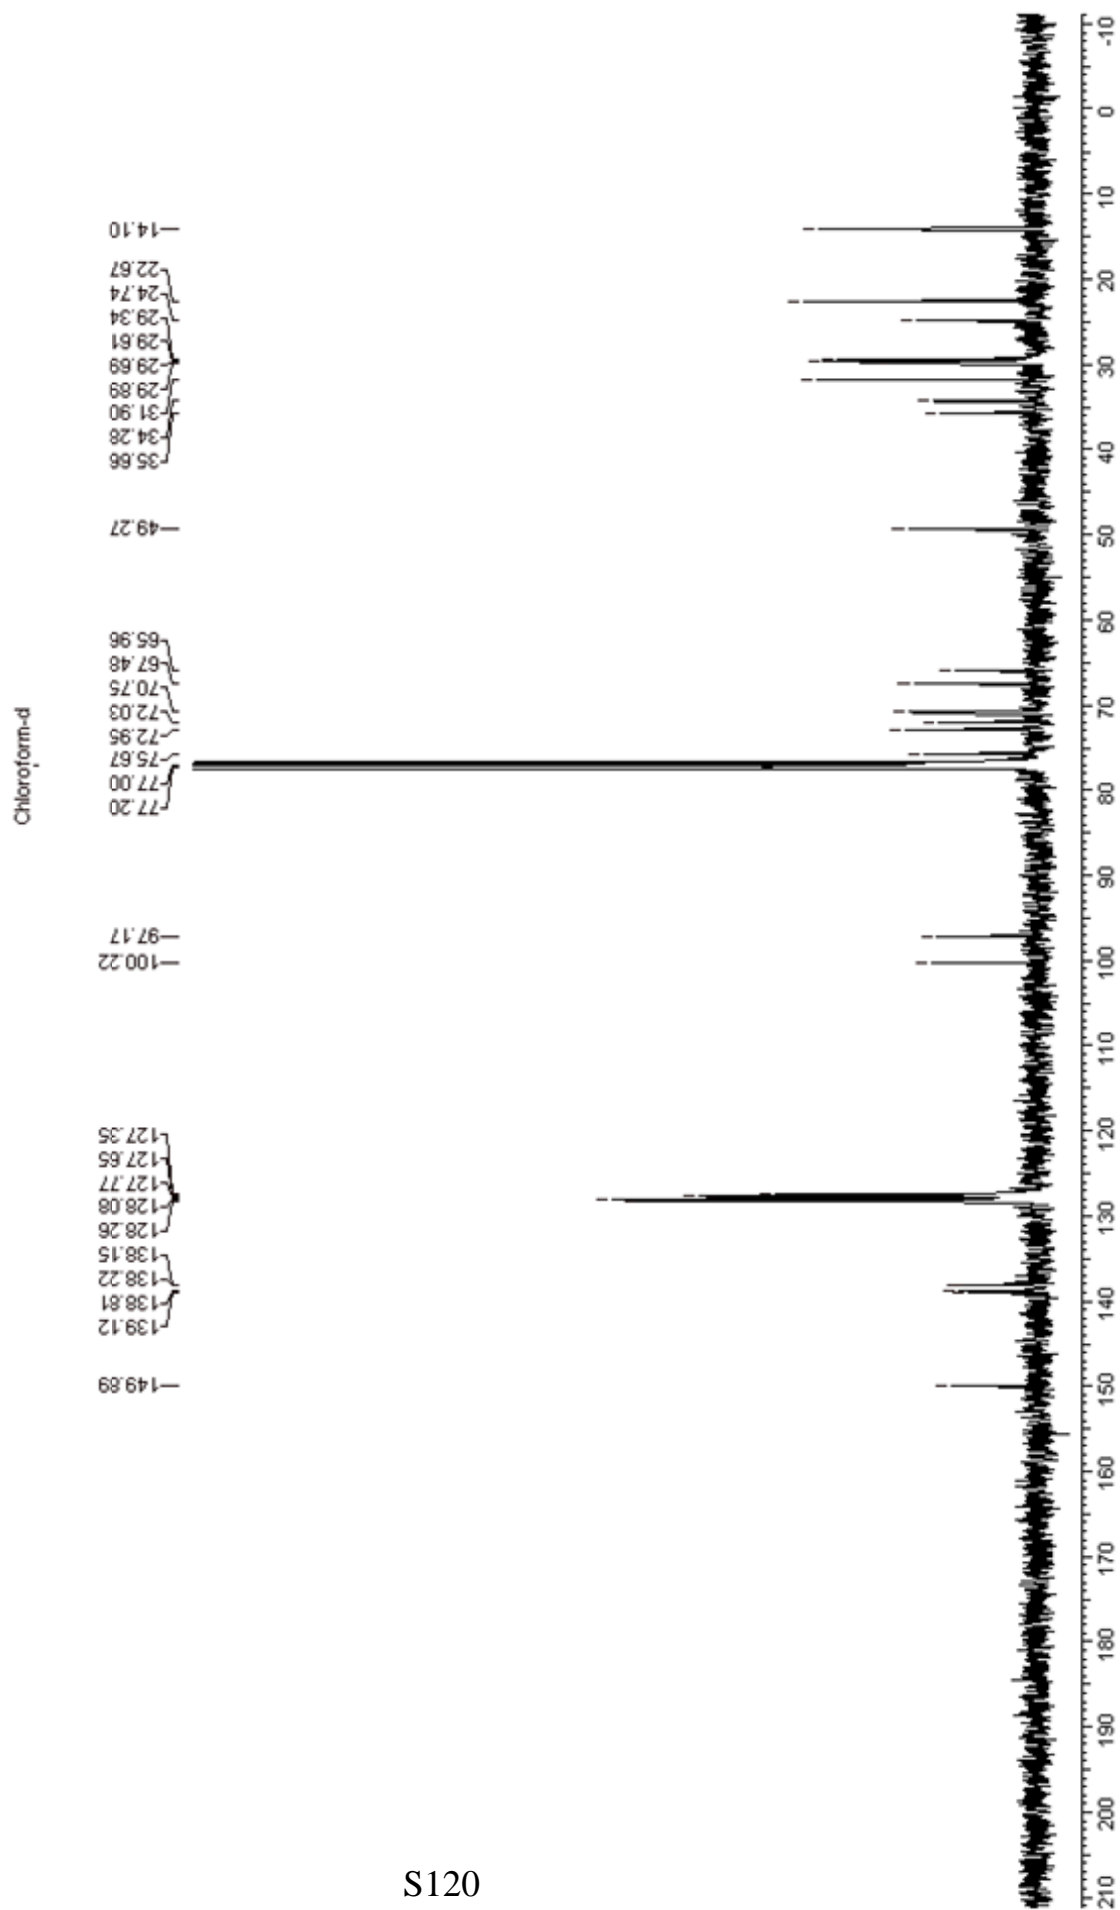



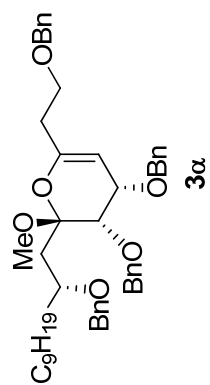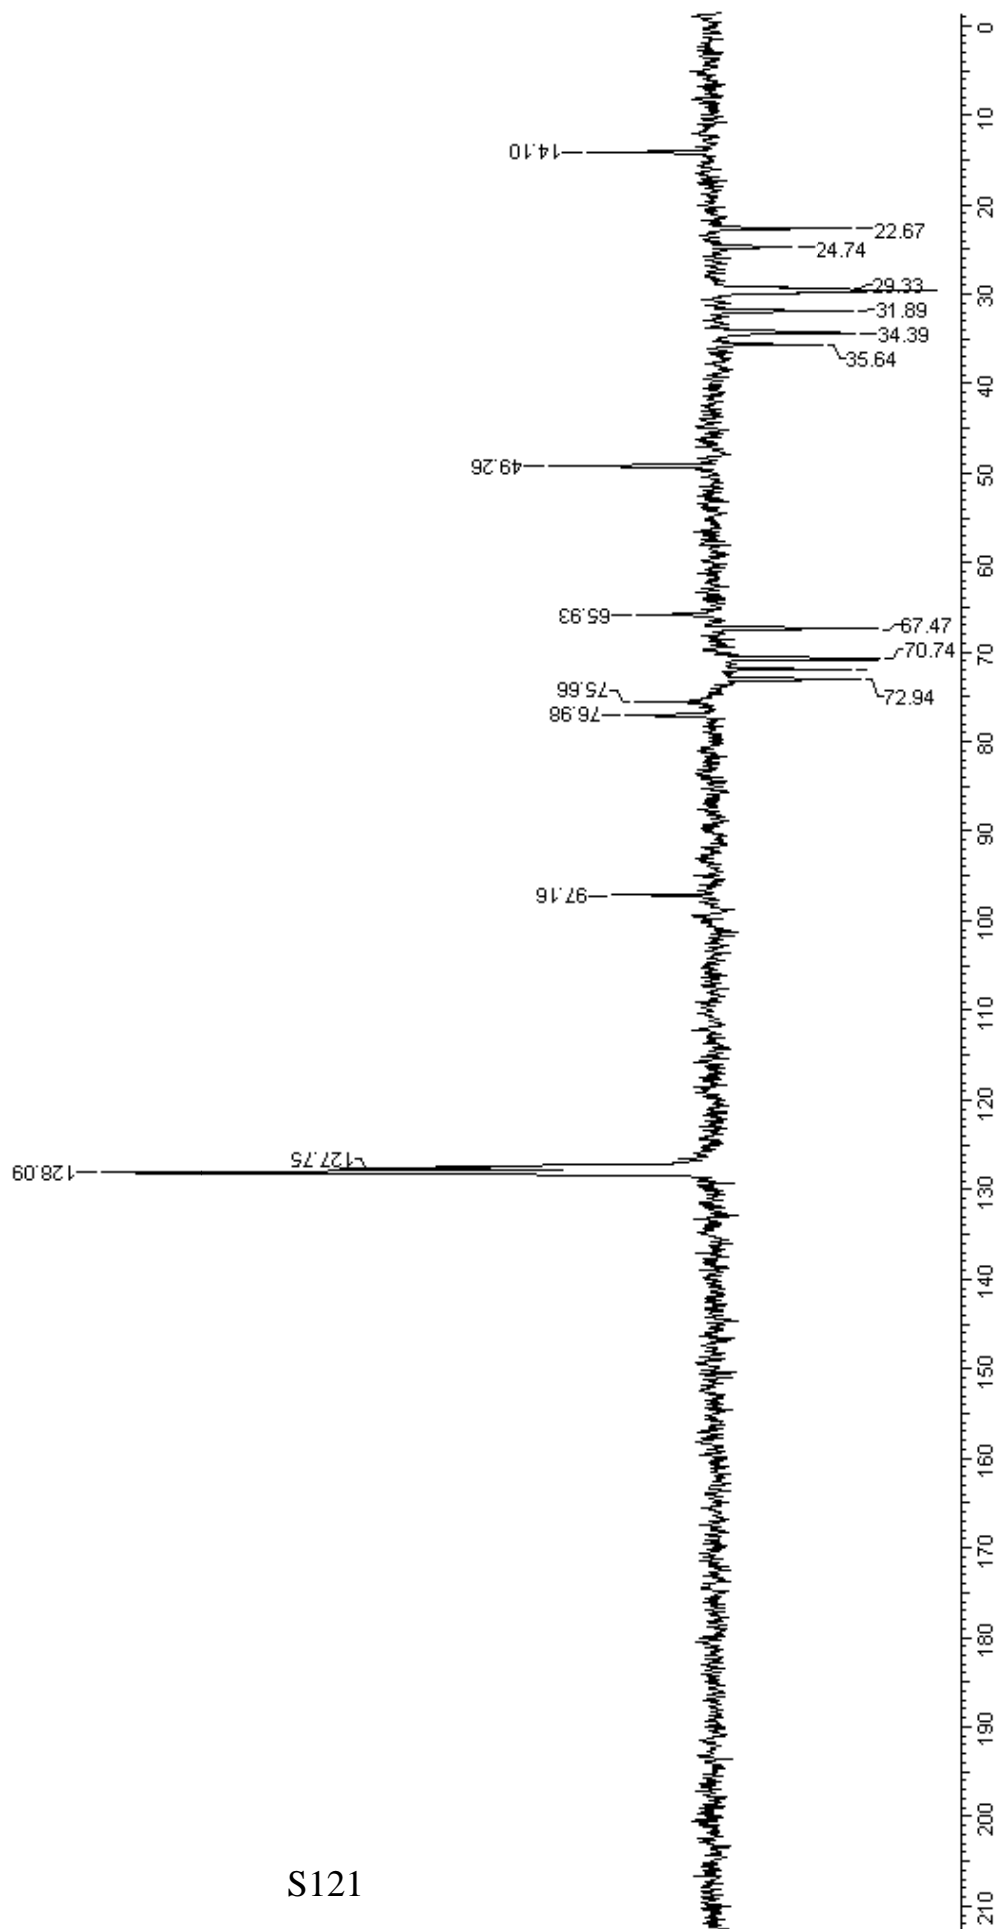



\*LICHENS - Q STAR PULSAR

+TOF MS: 0.017 to 0.167 min from Sample 2 of CYC.wiff  
a=3.2927893562413040e-004, t0=-3.24358683266109440e+001

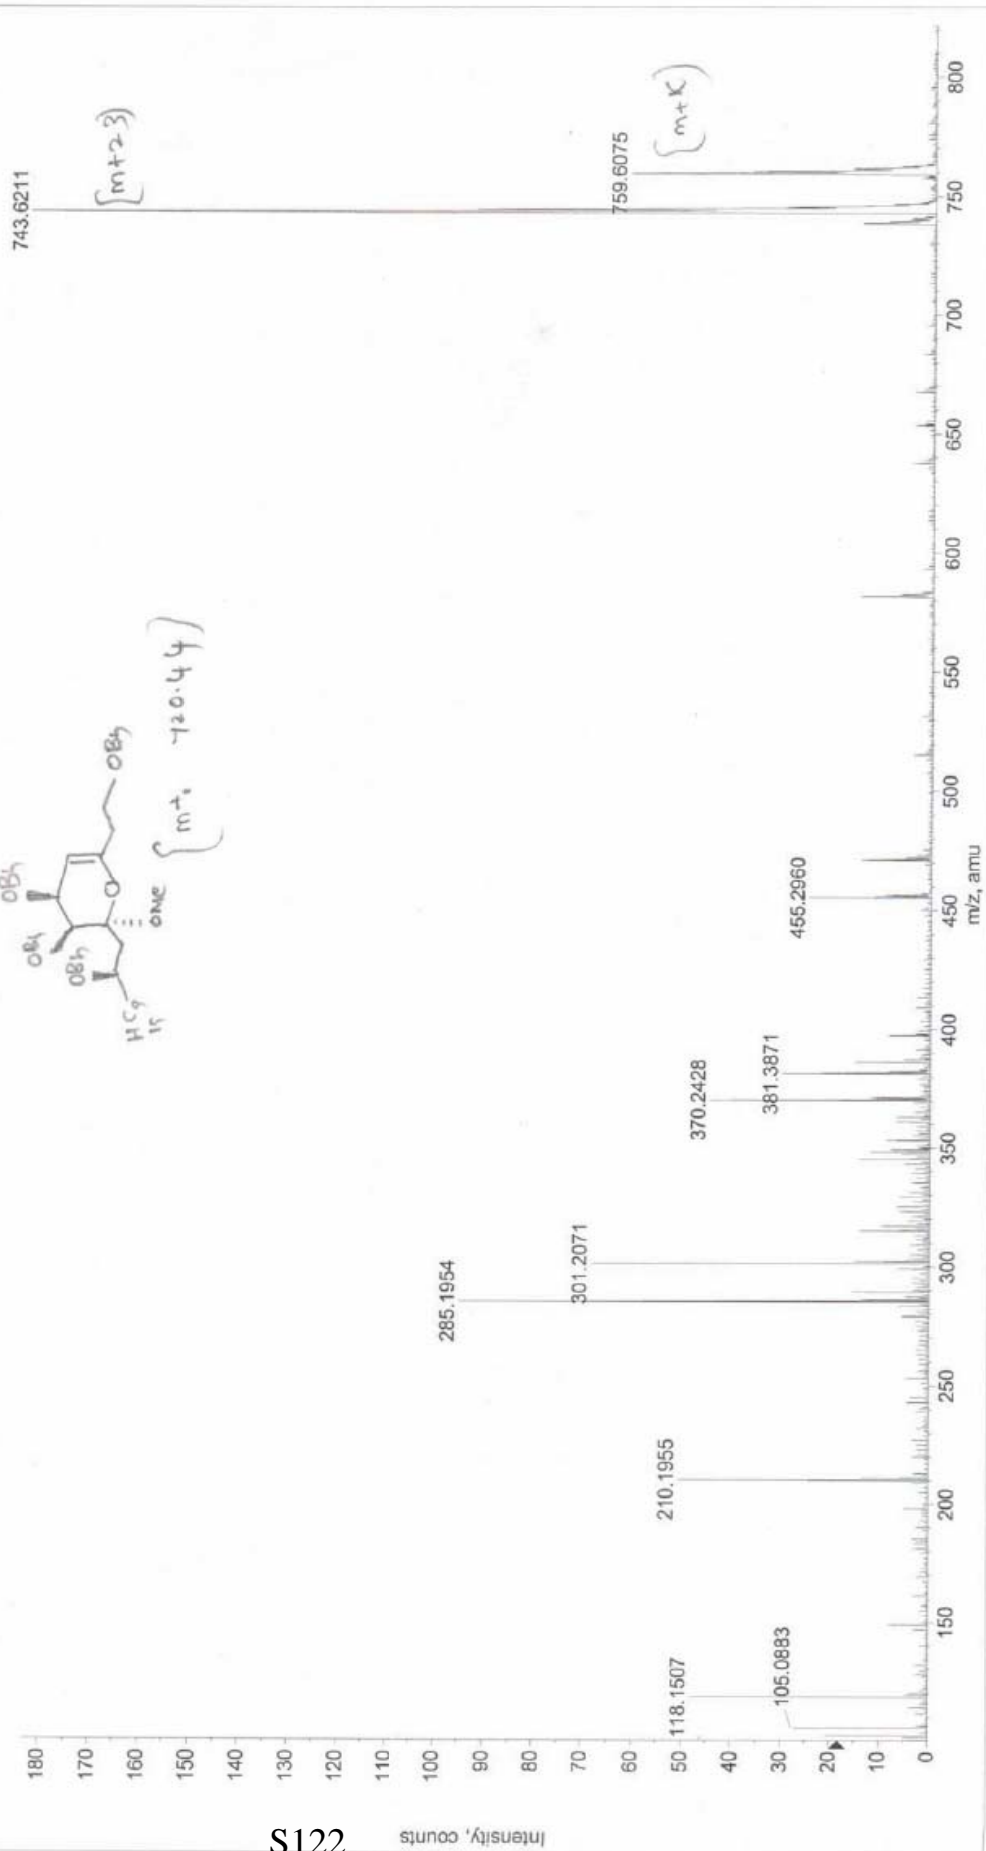

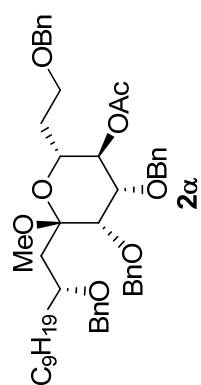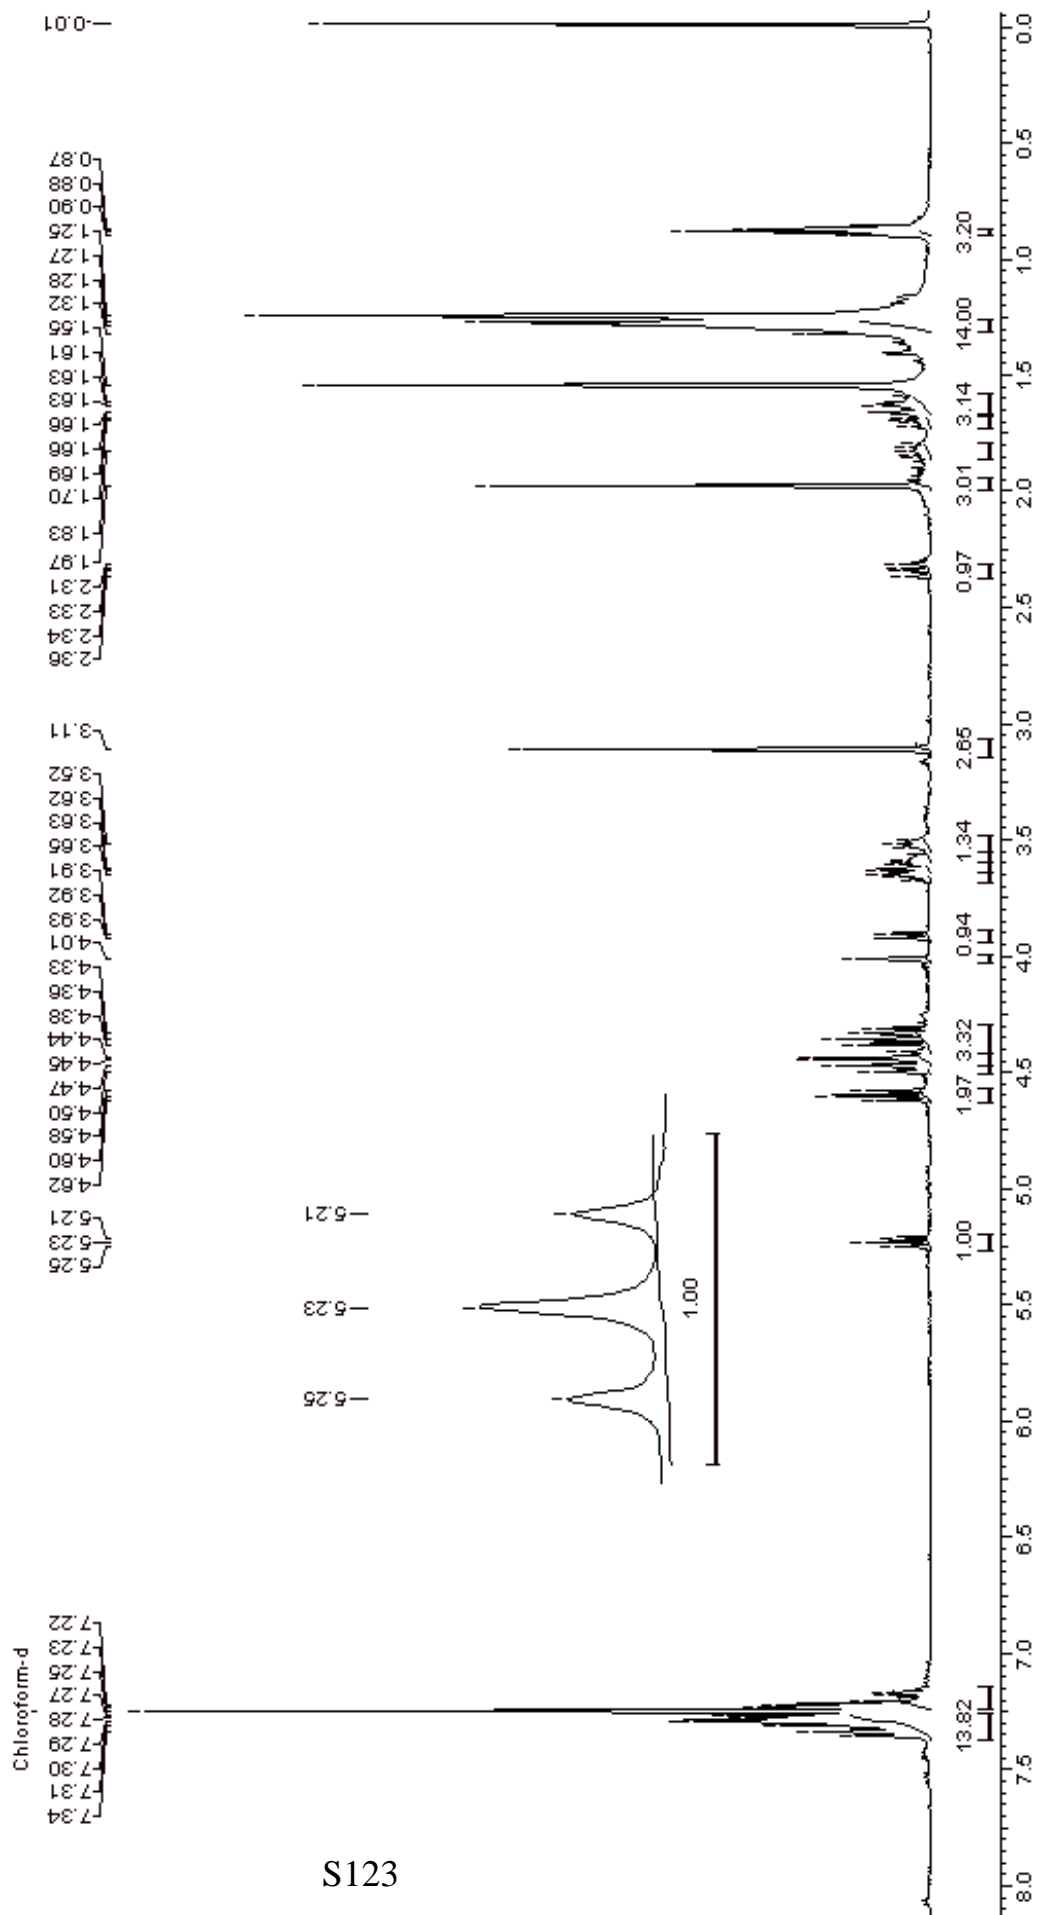

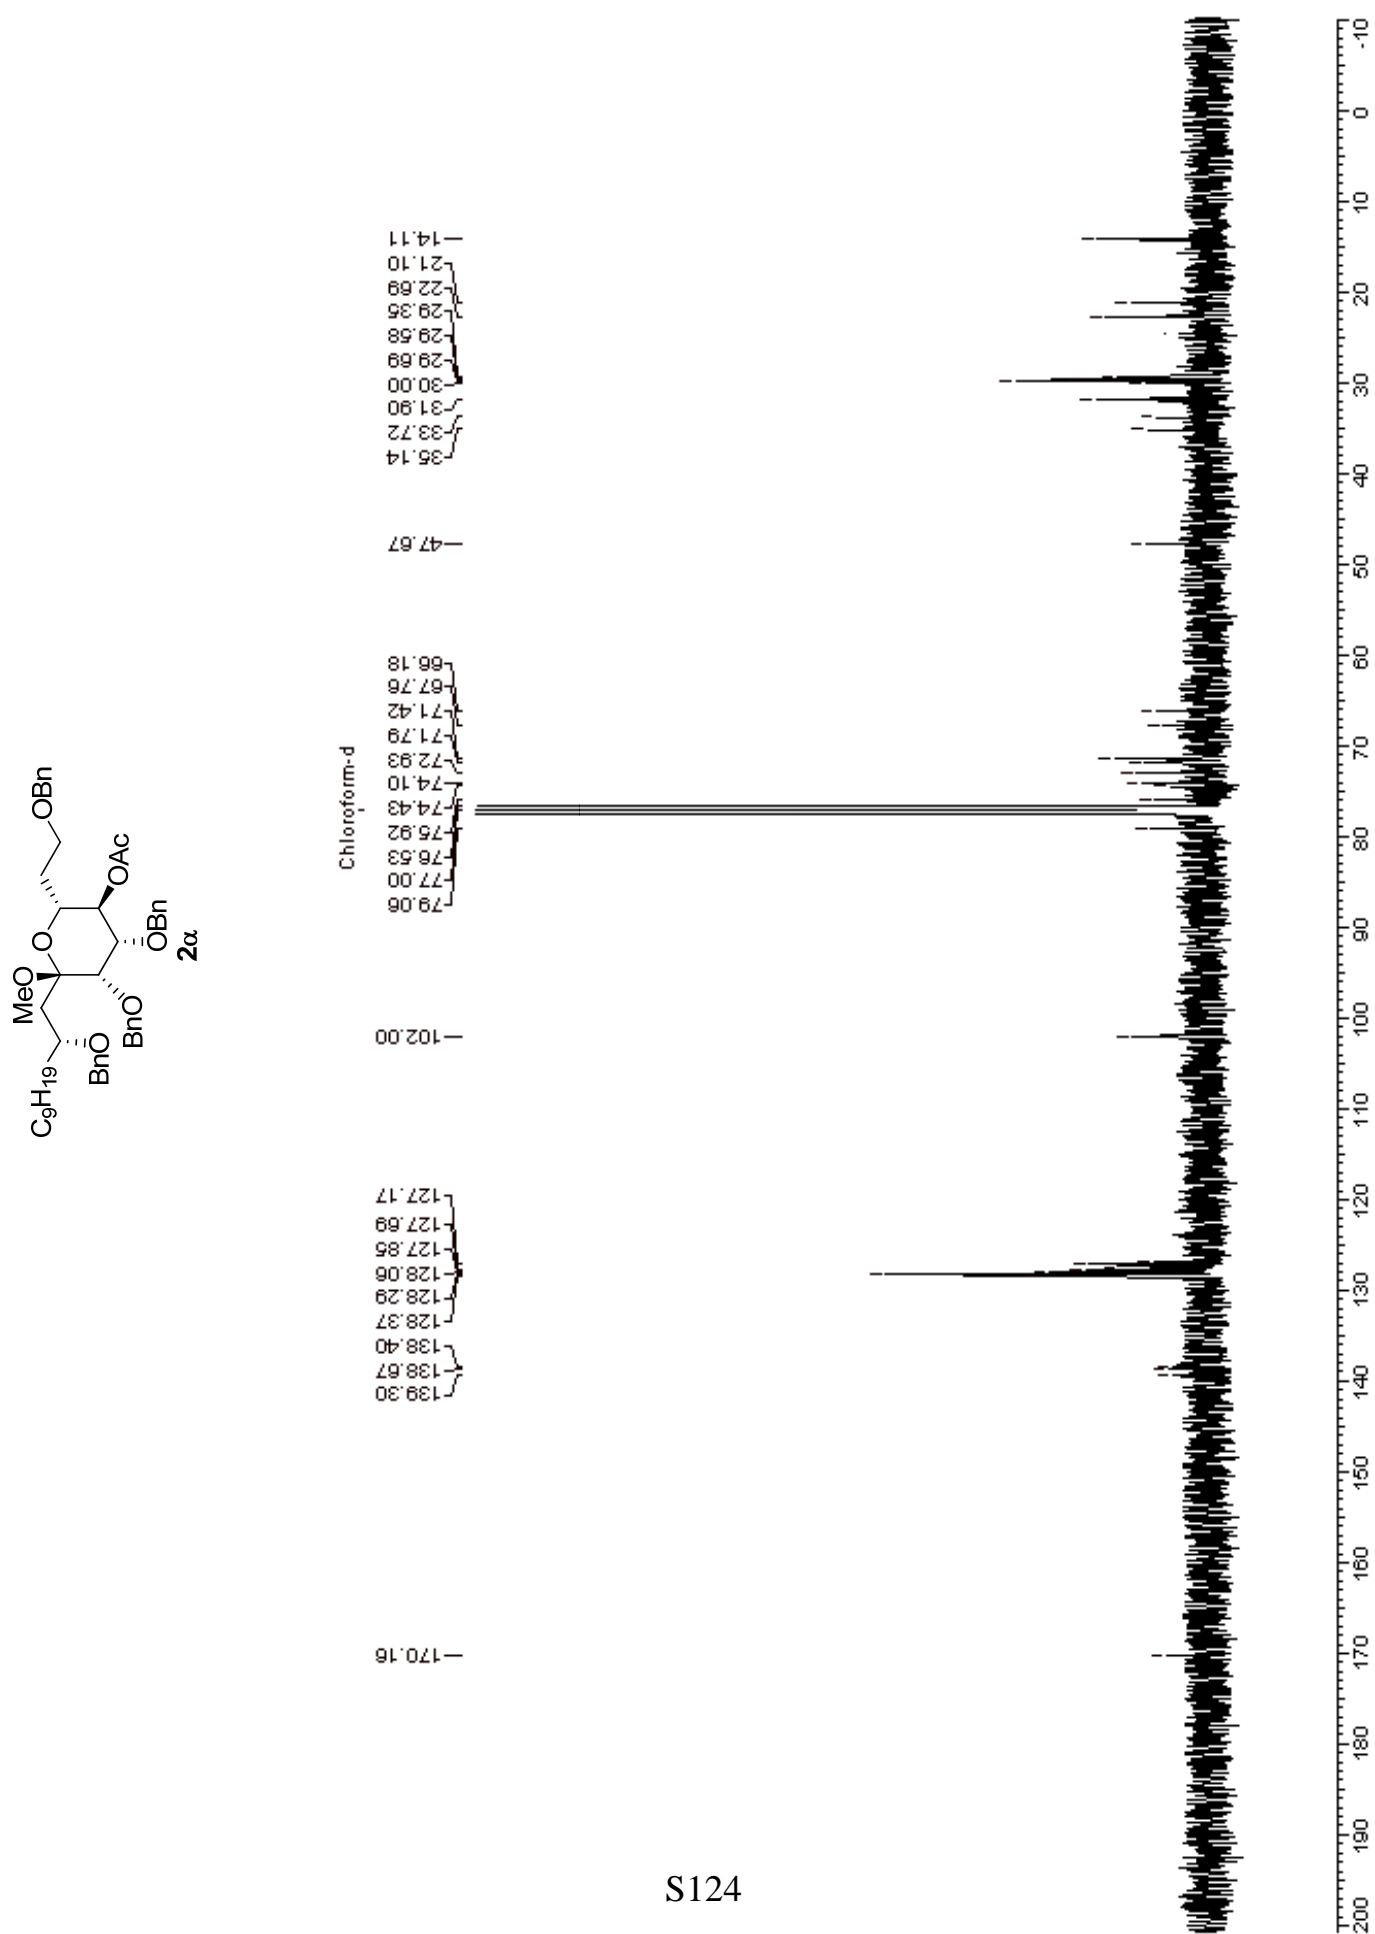

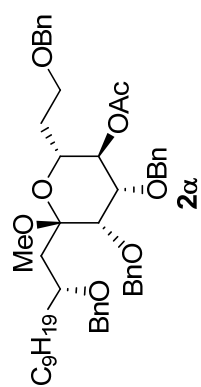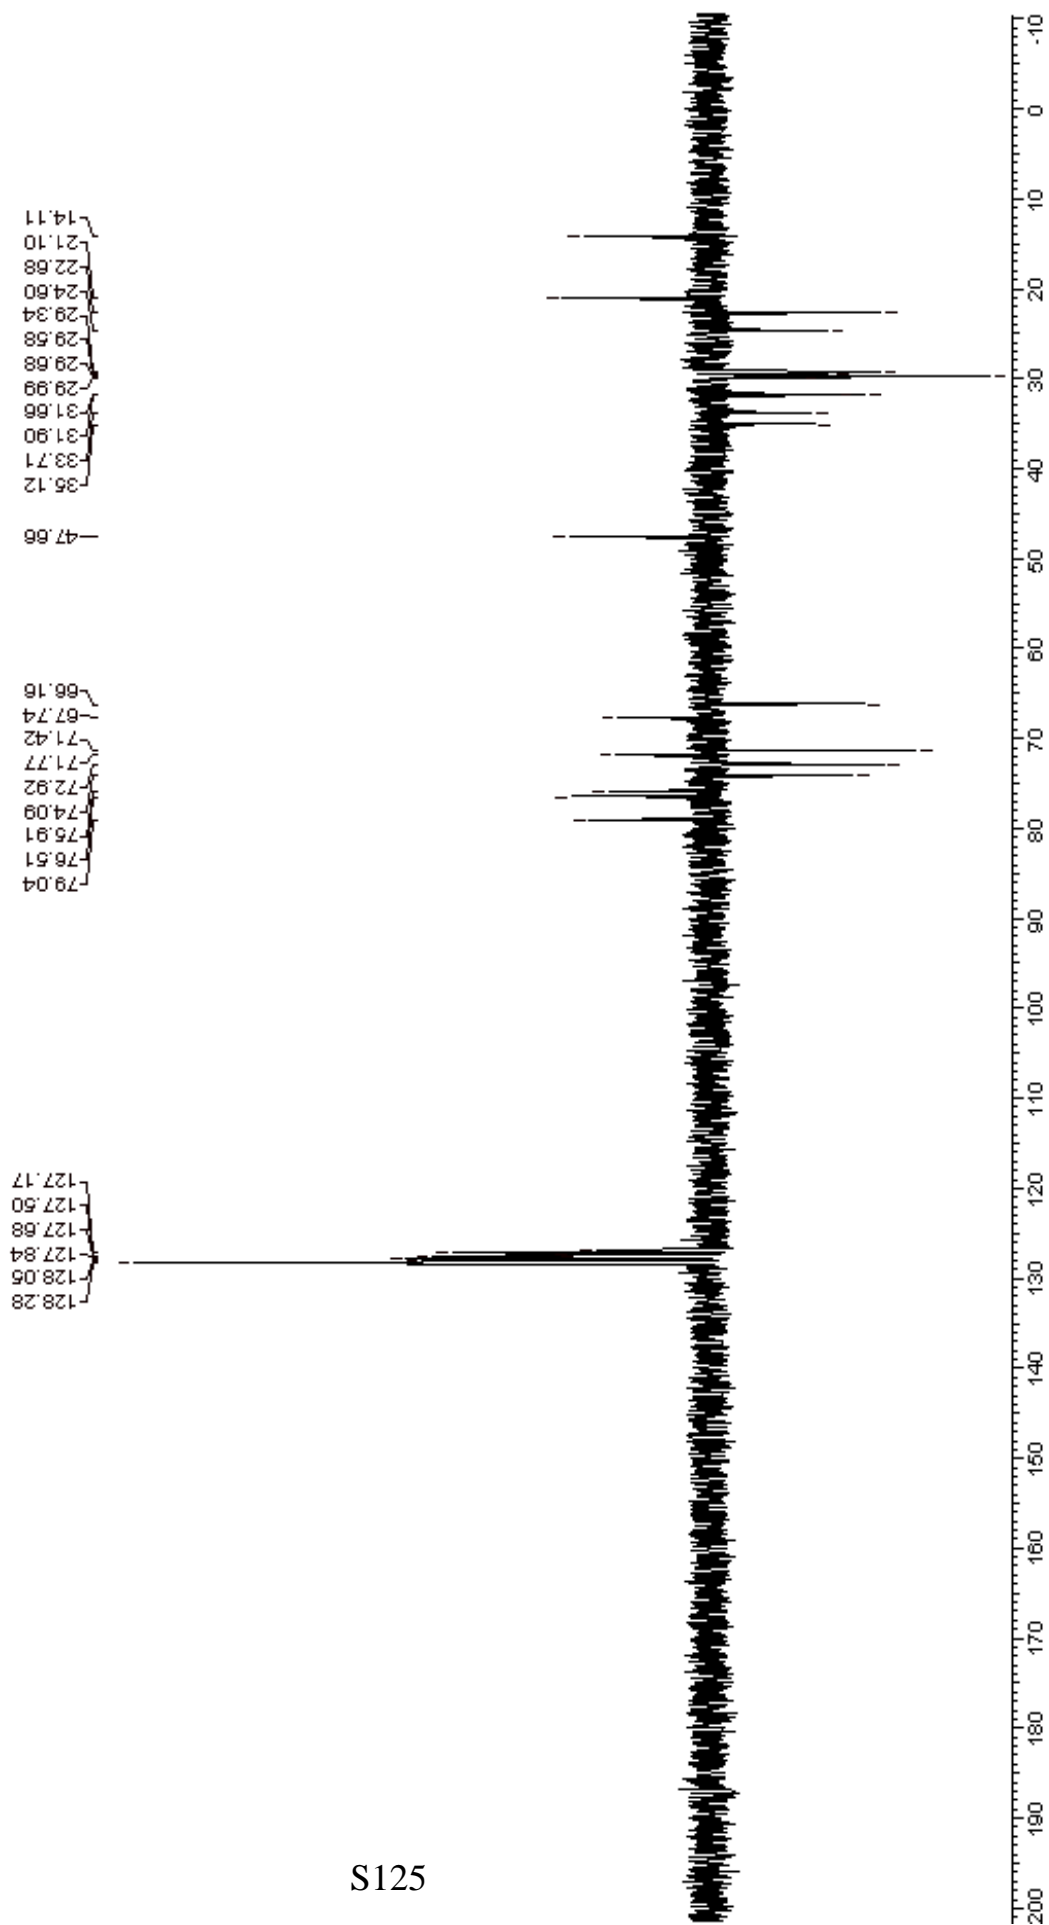

# COSY-2 $\alpha$

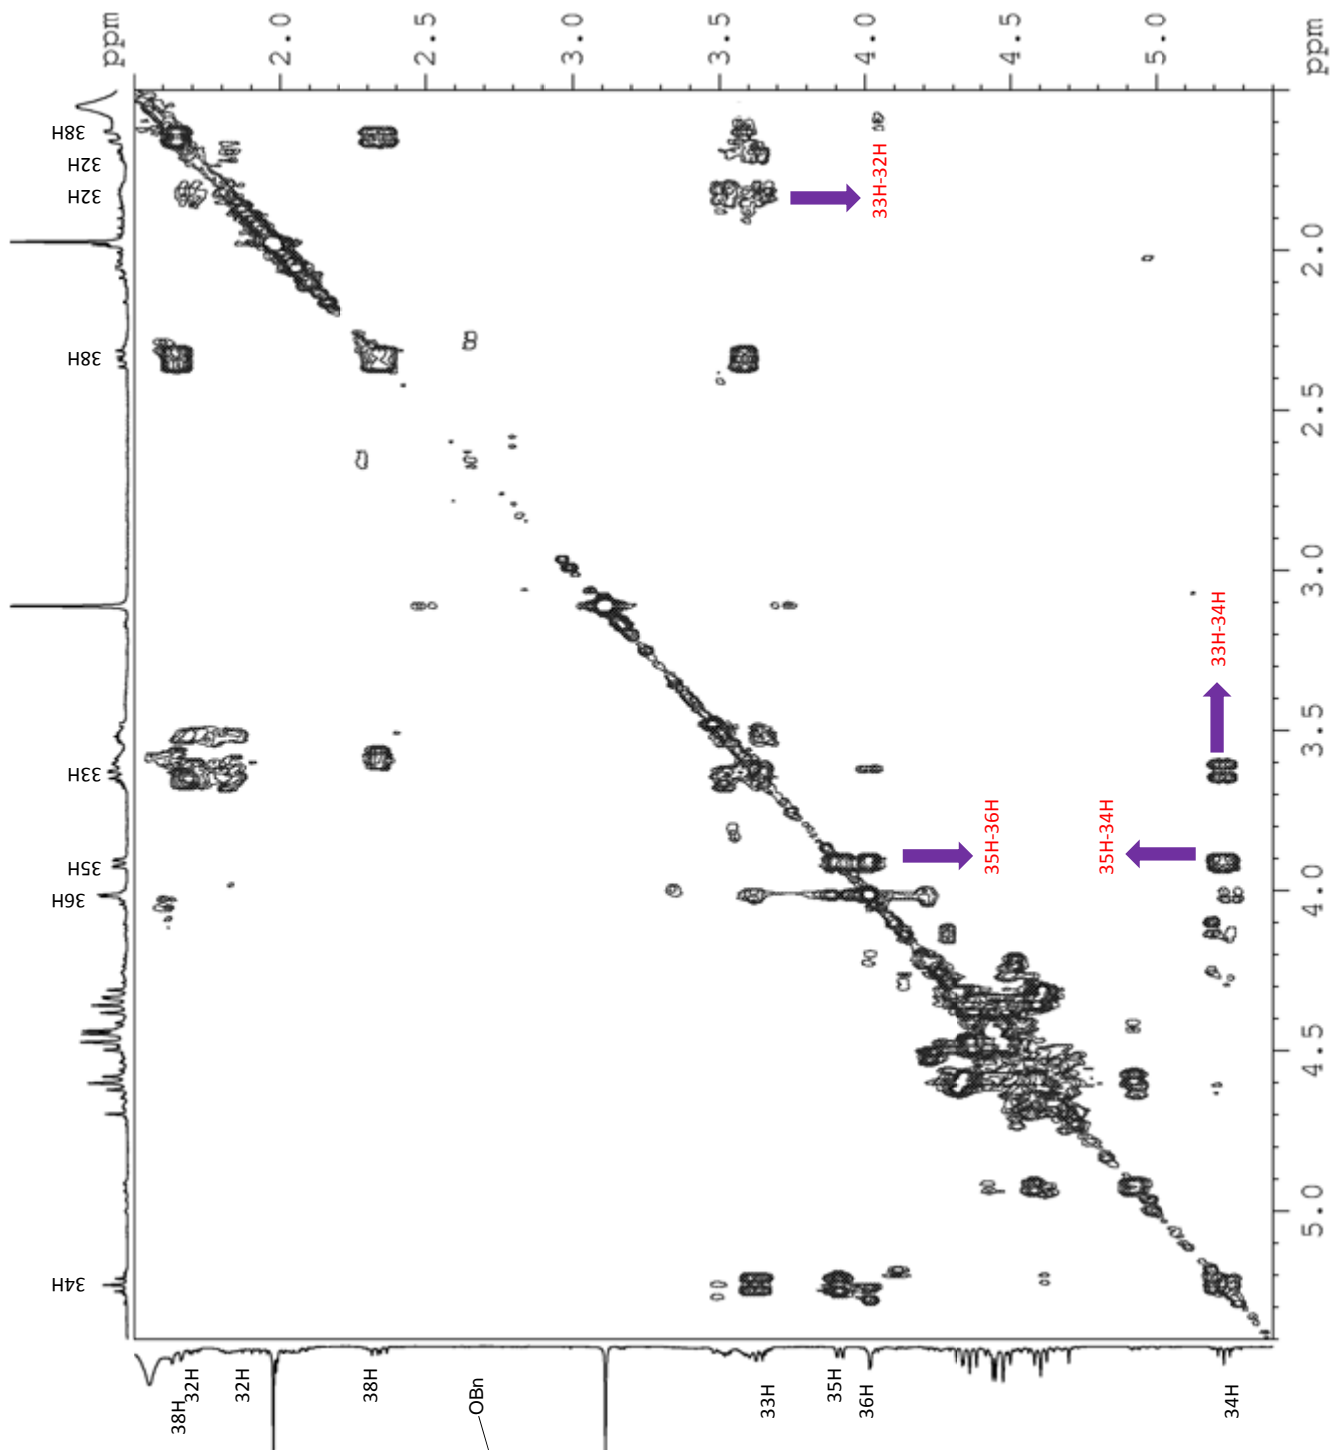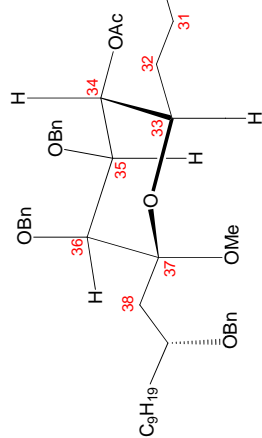

# NOESY-2α

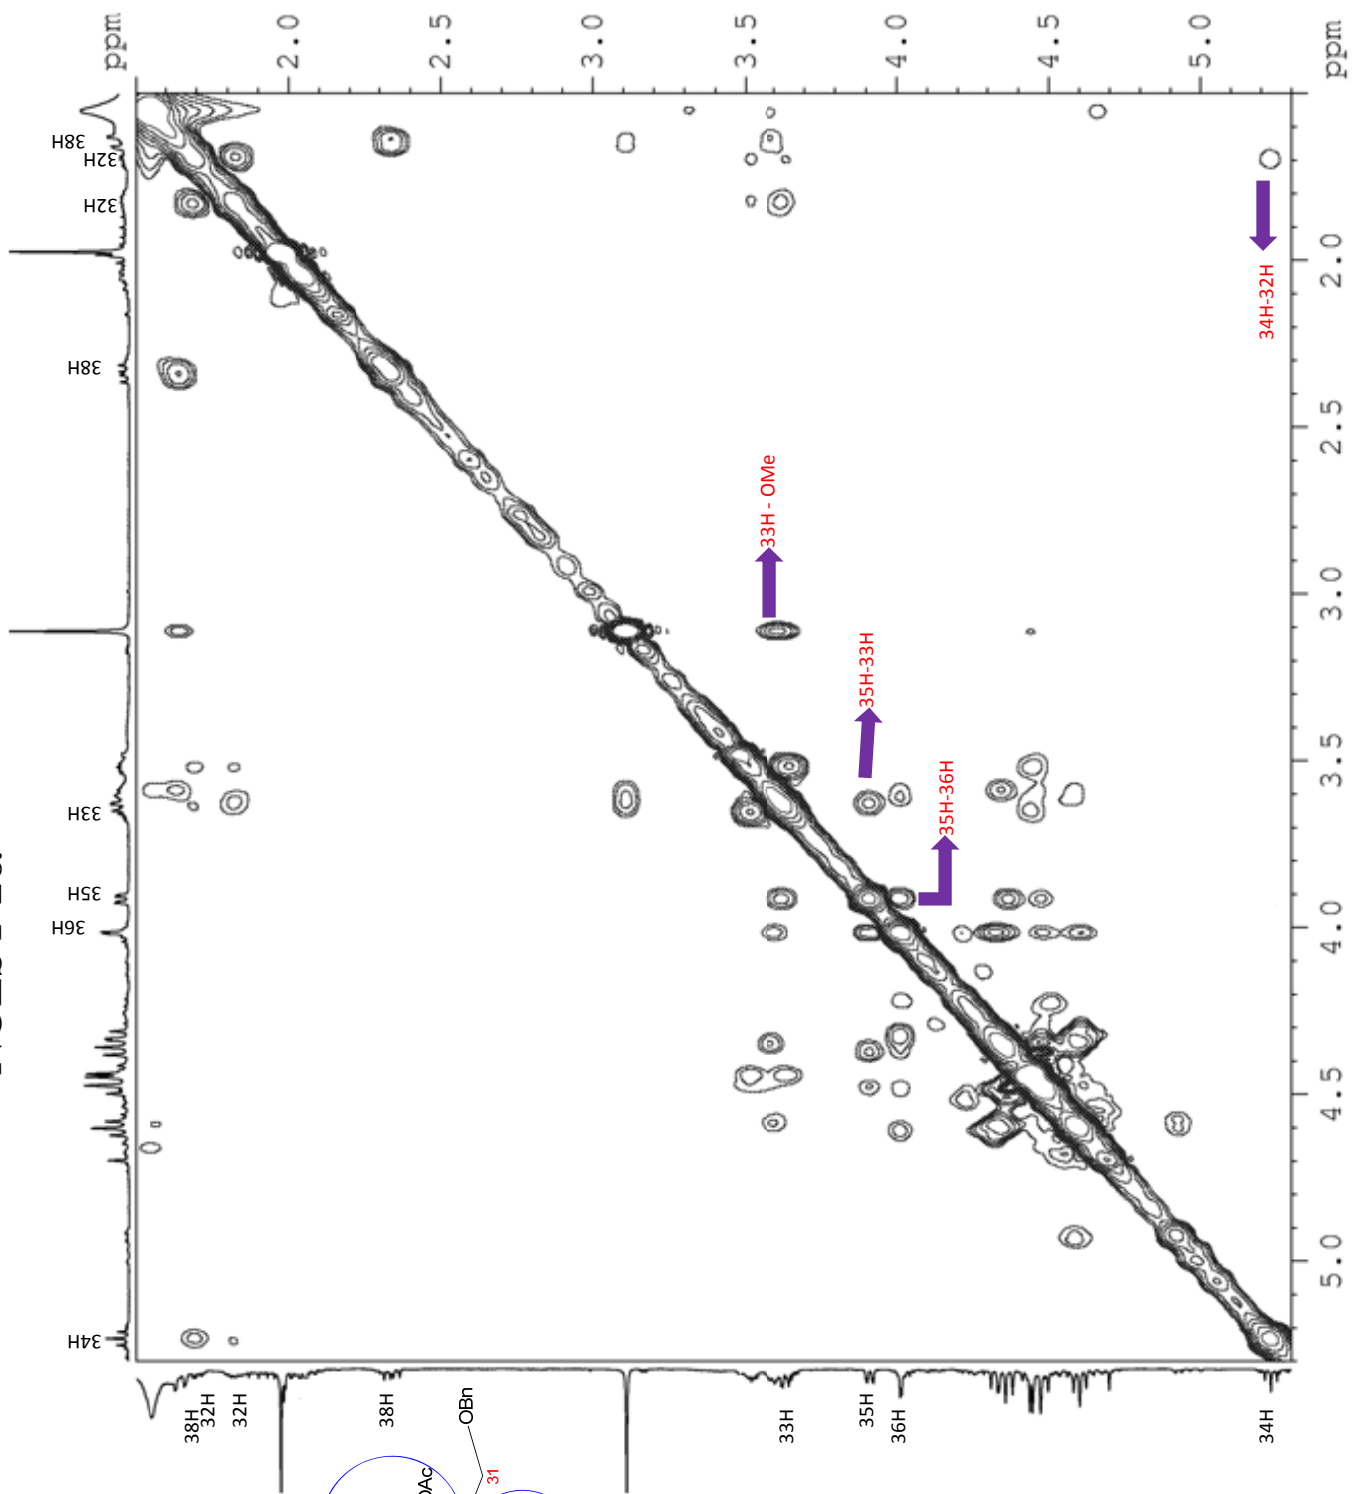

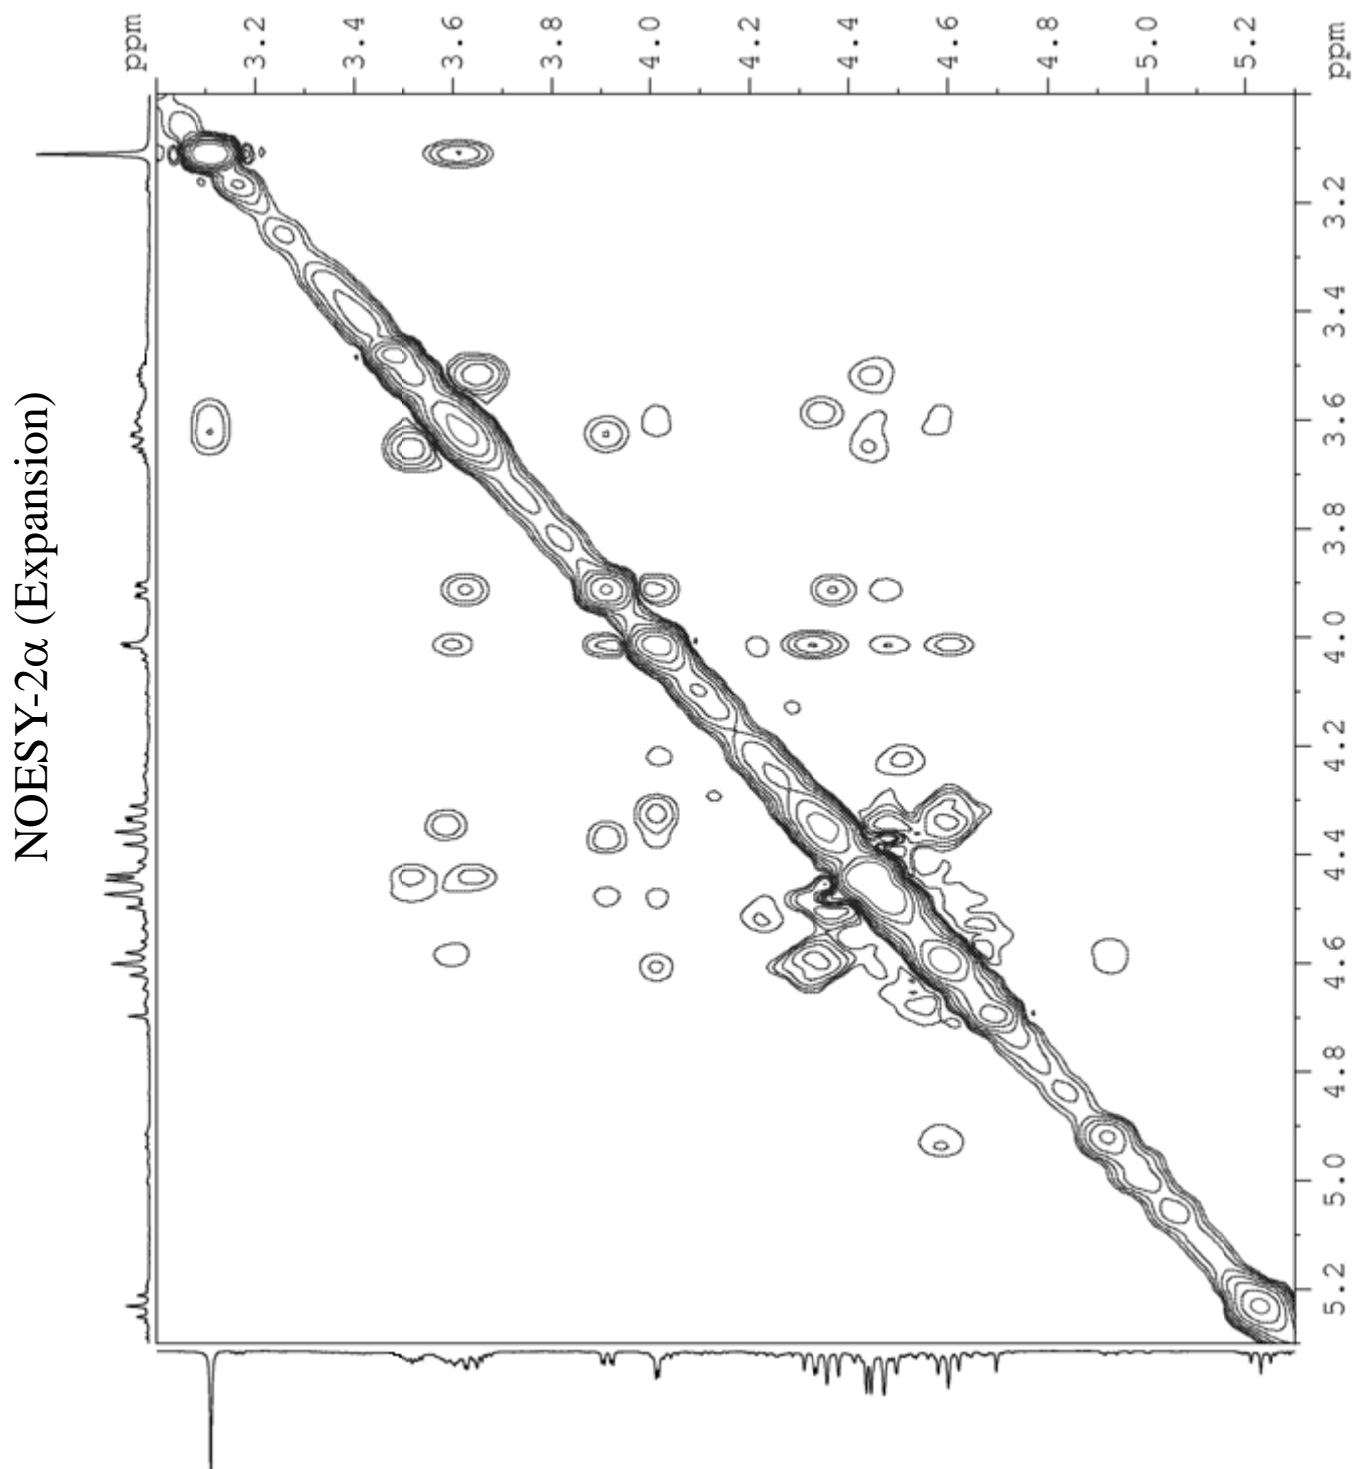



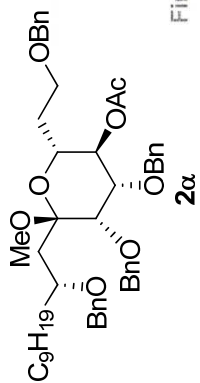

### Spectrum Report

S27 (A)

Final - Shots 400 - HNG GROUP; Label G3

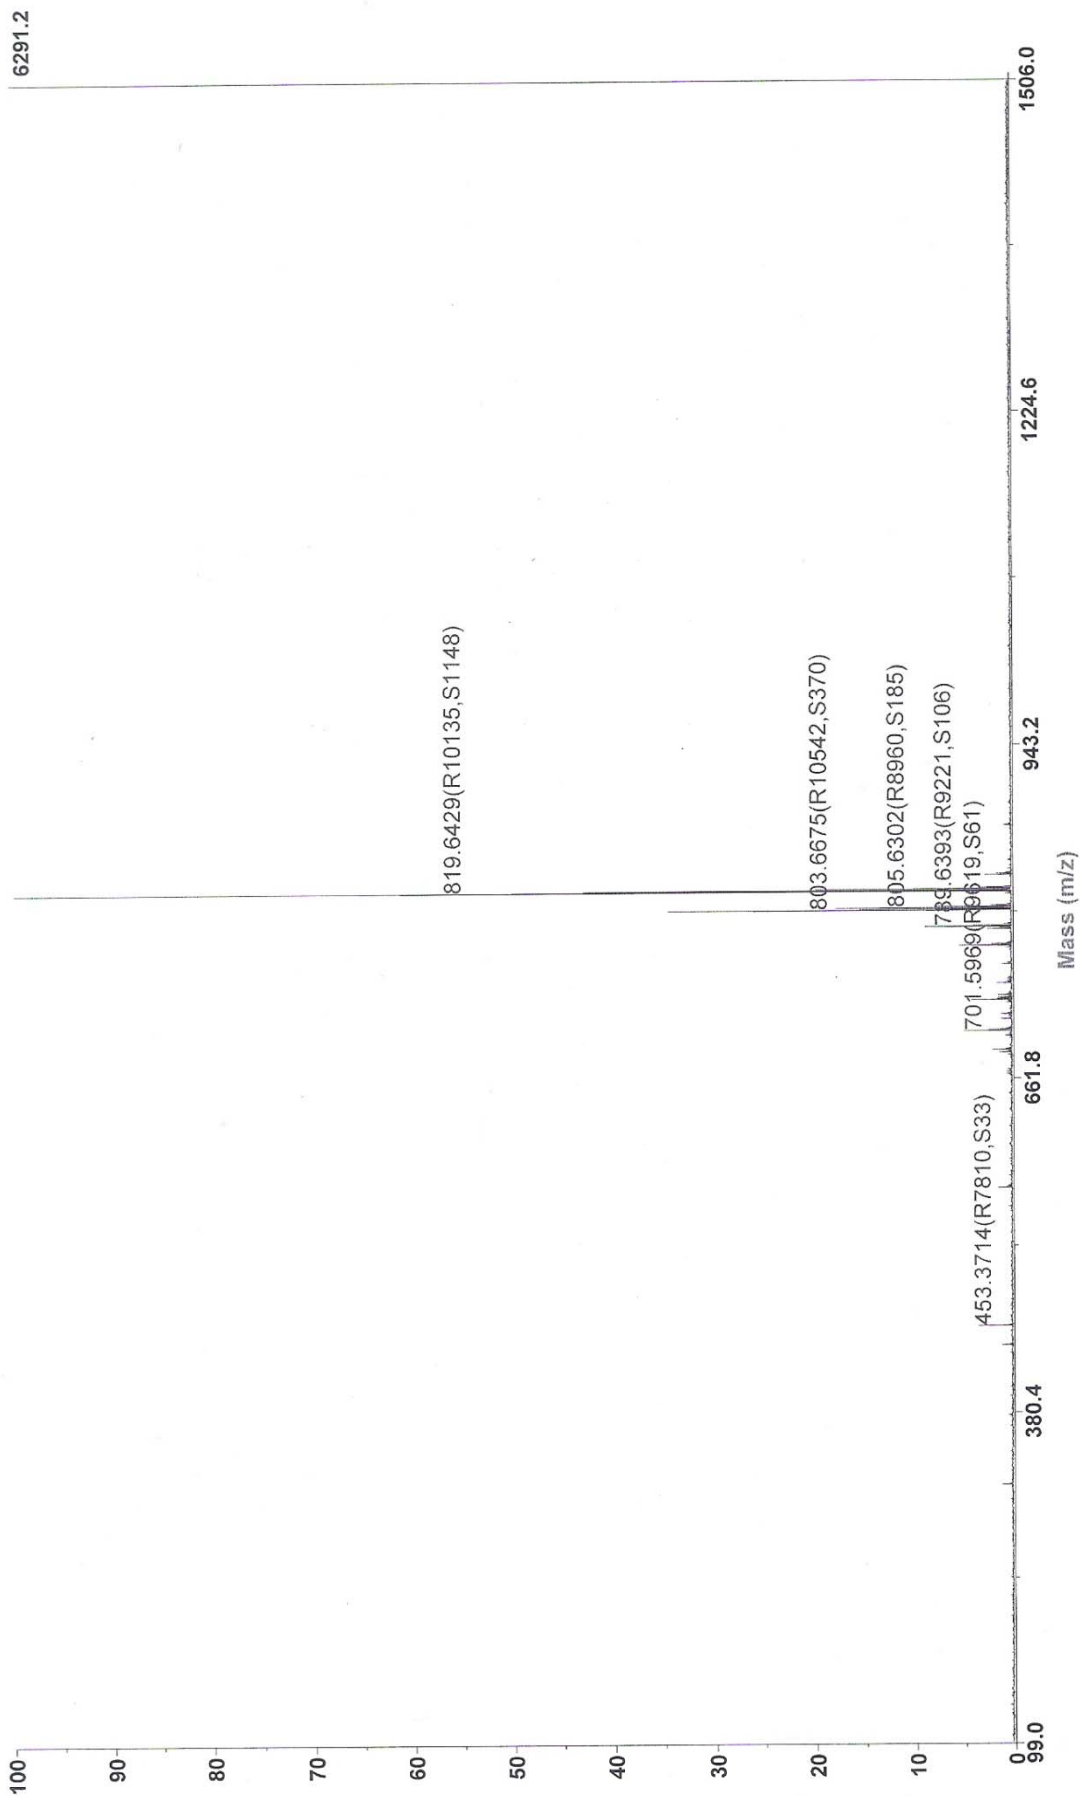

S129

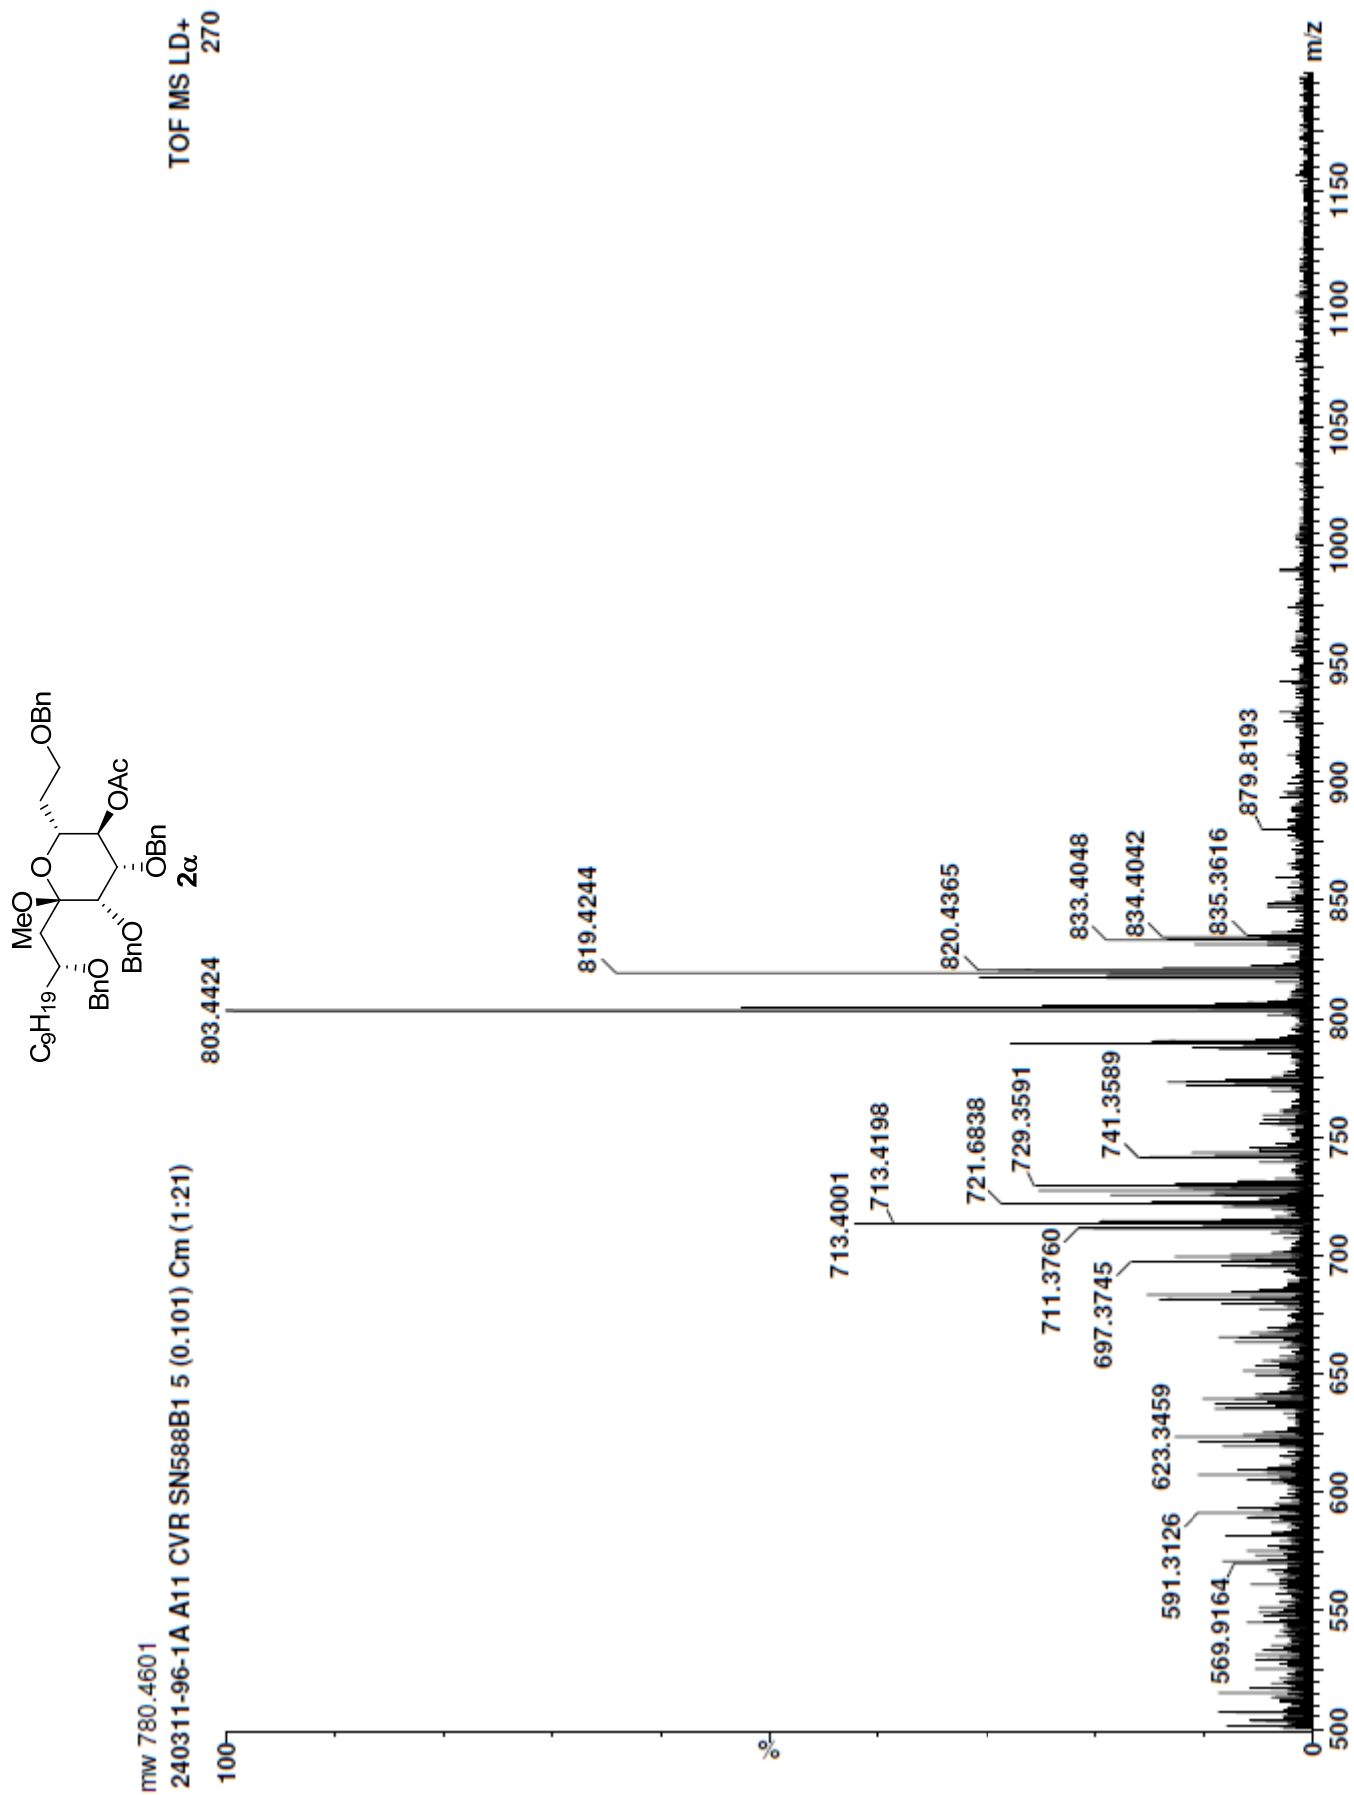

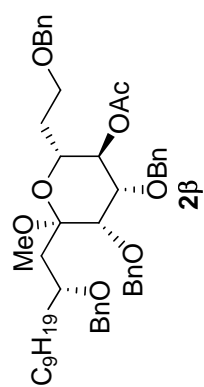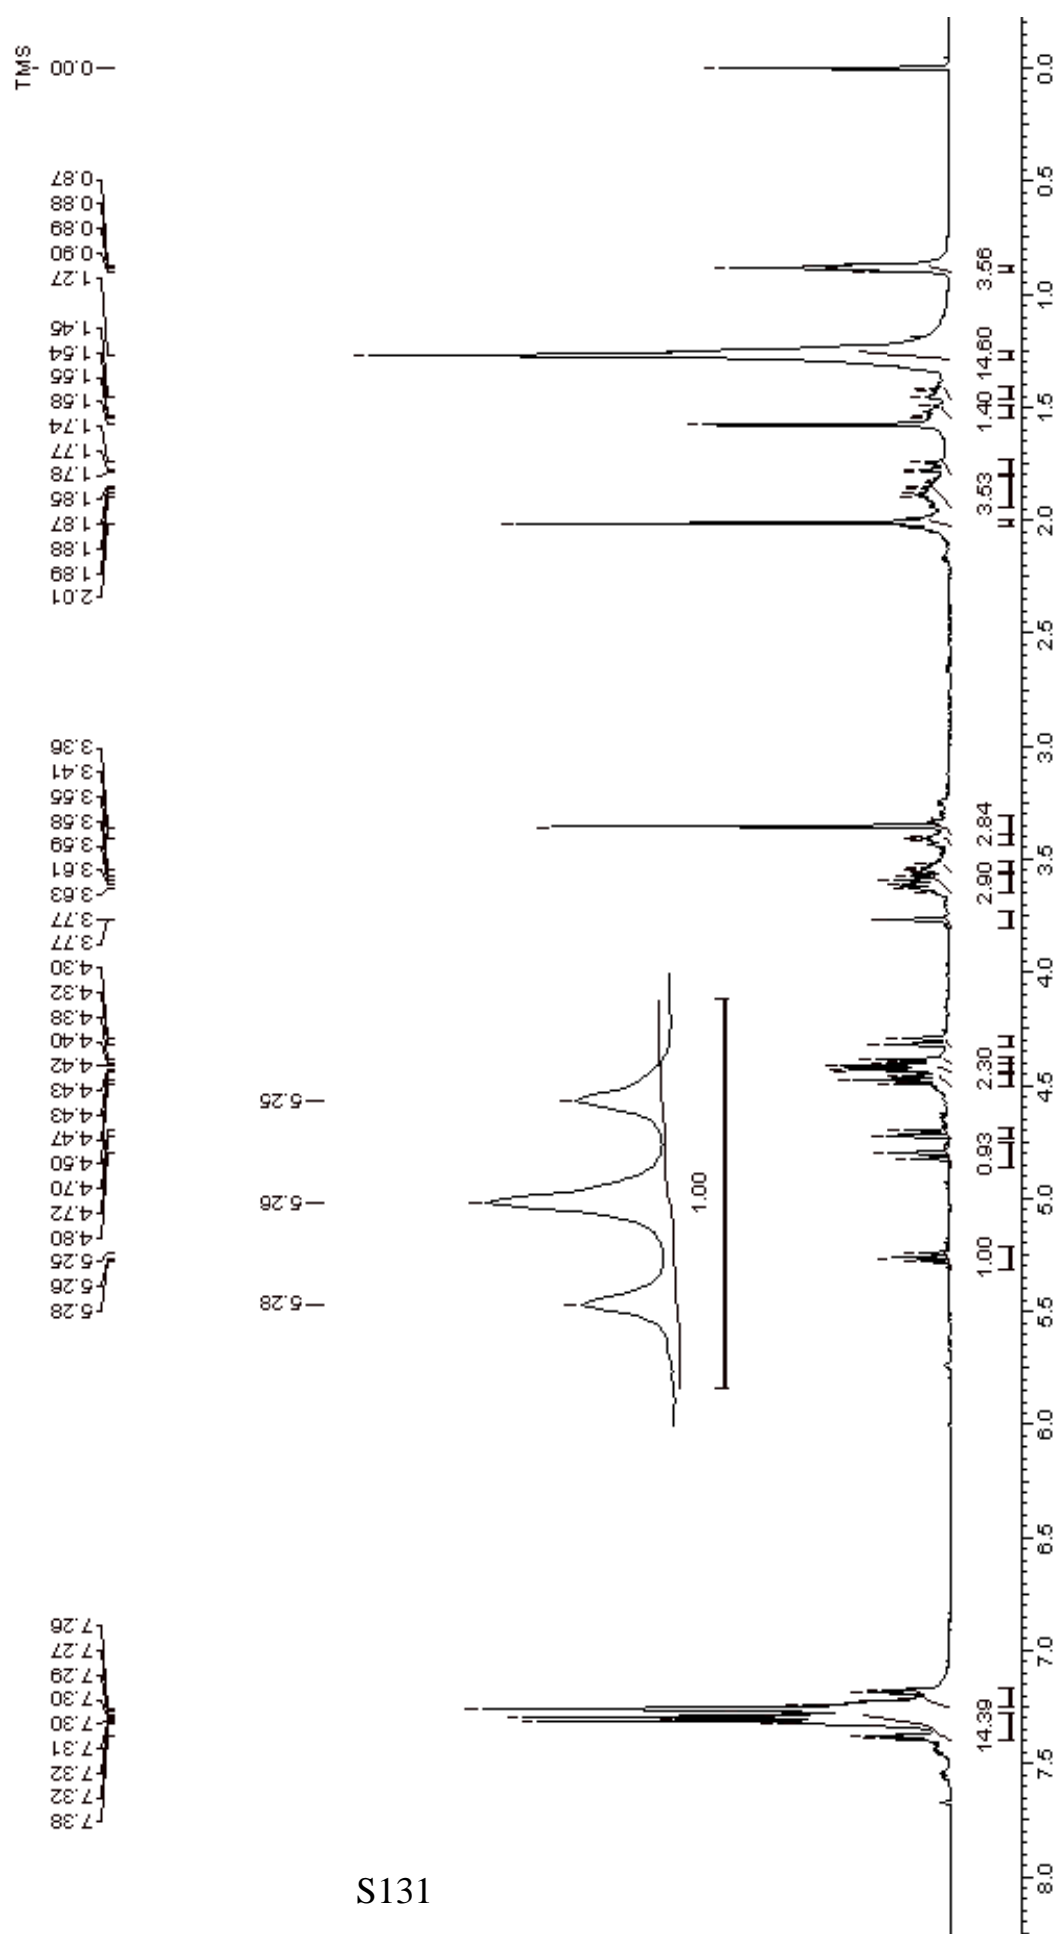

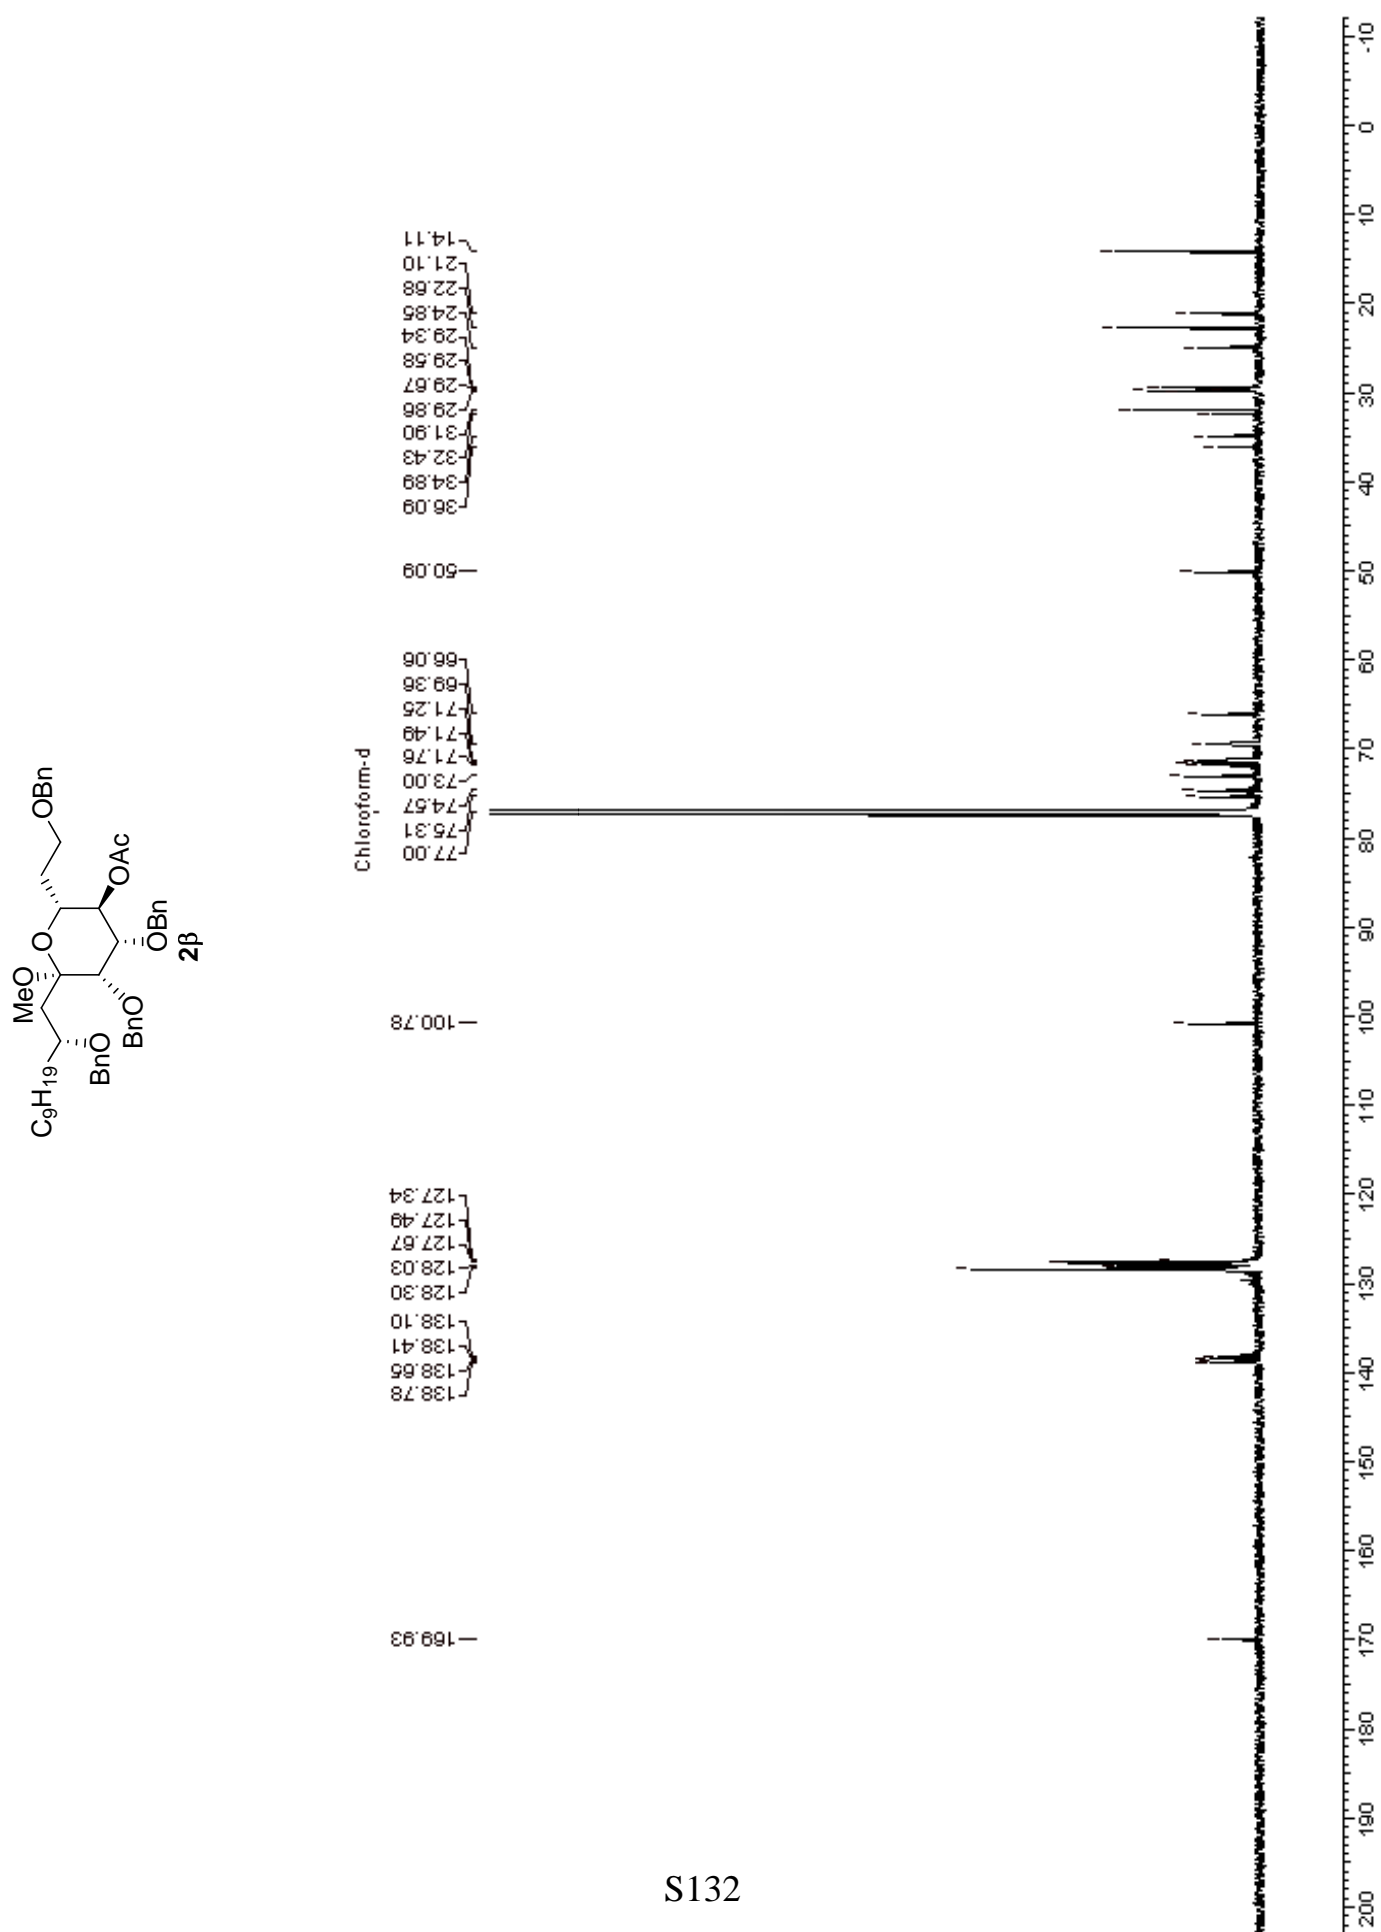

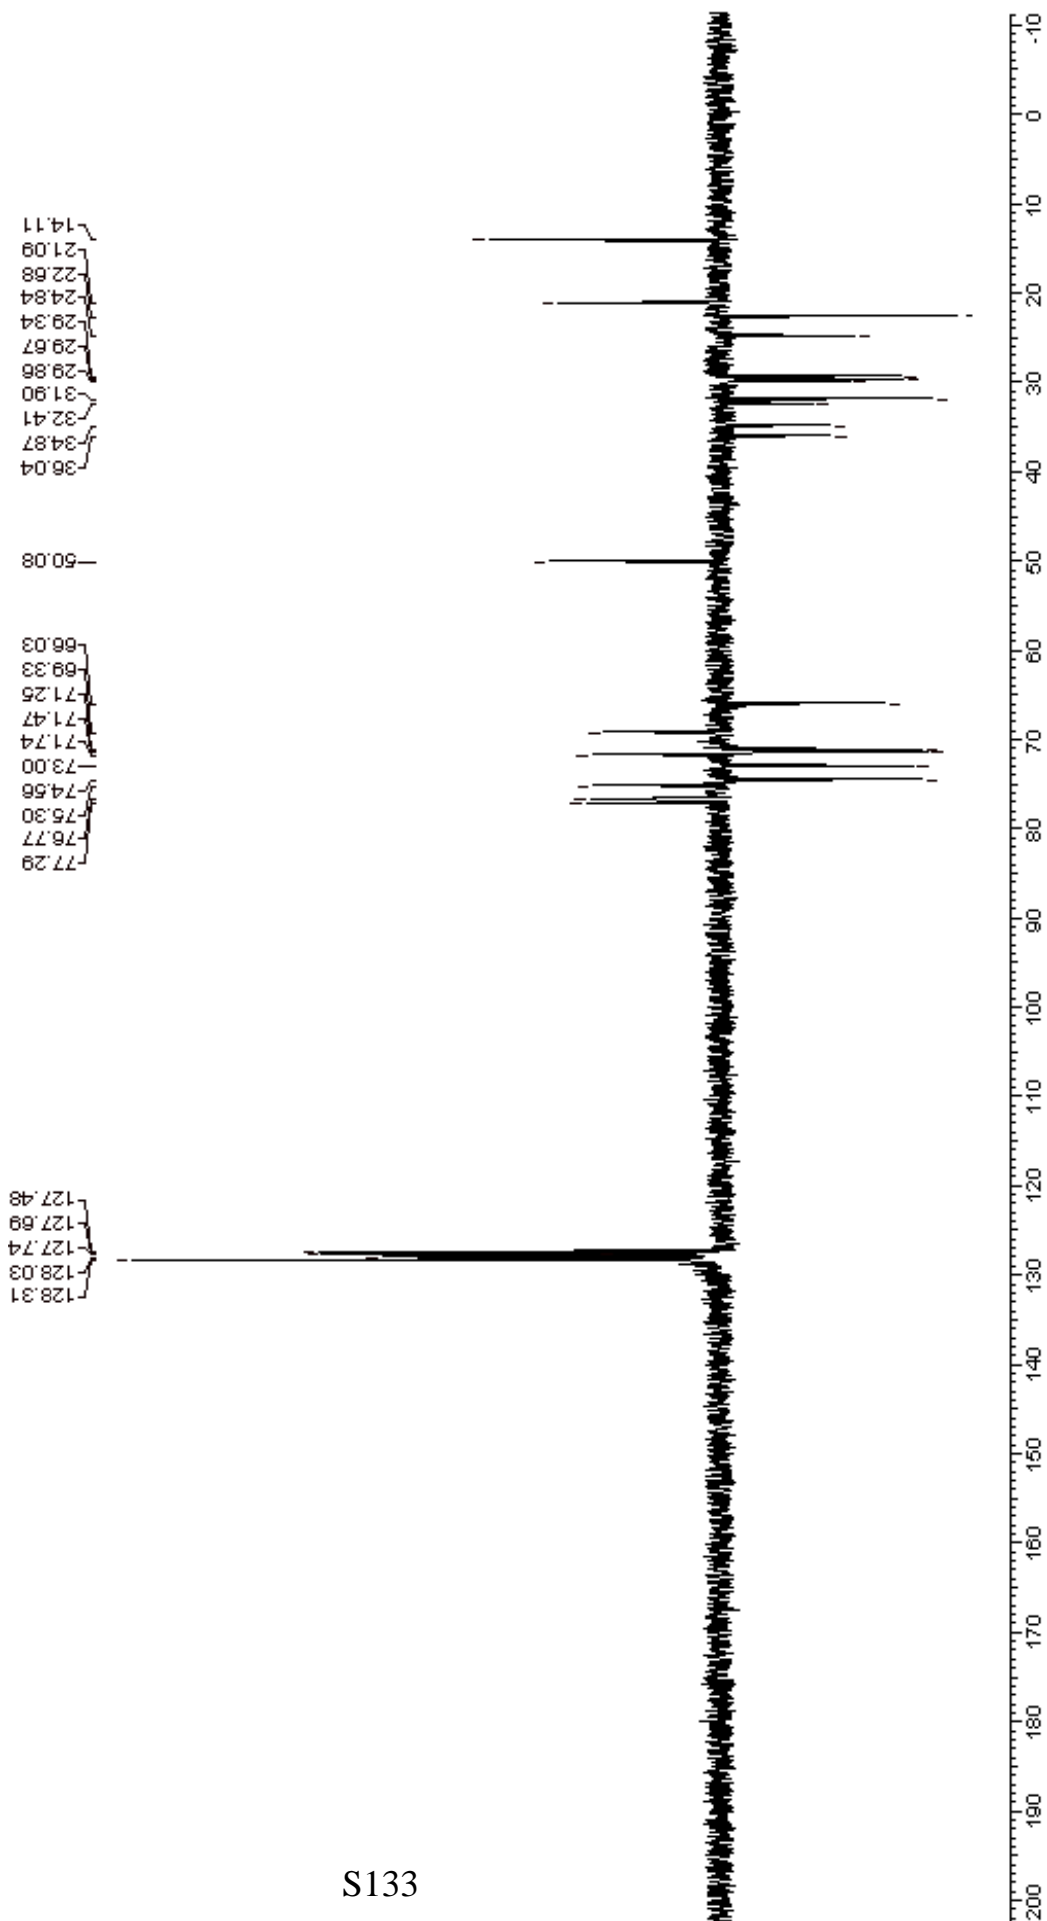

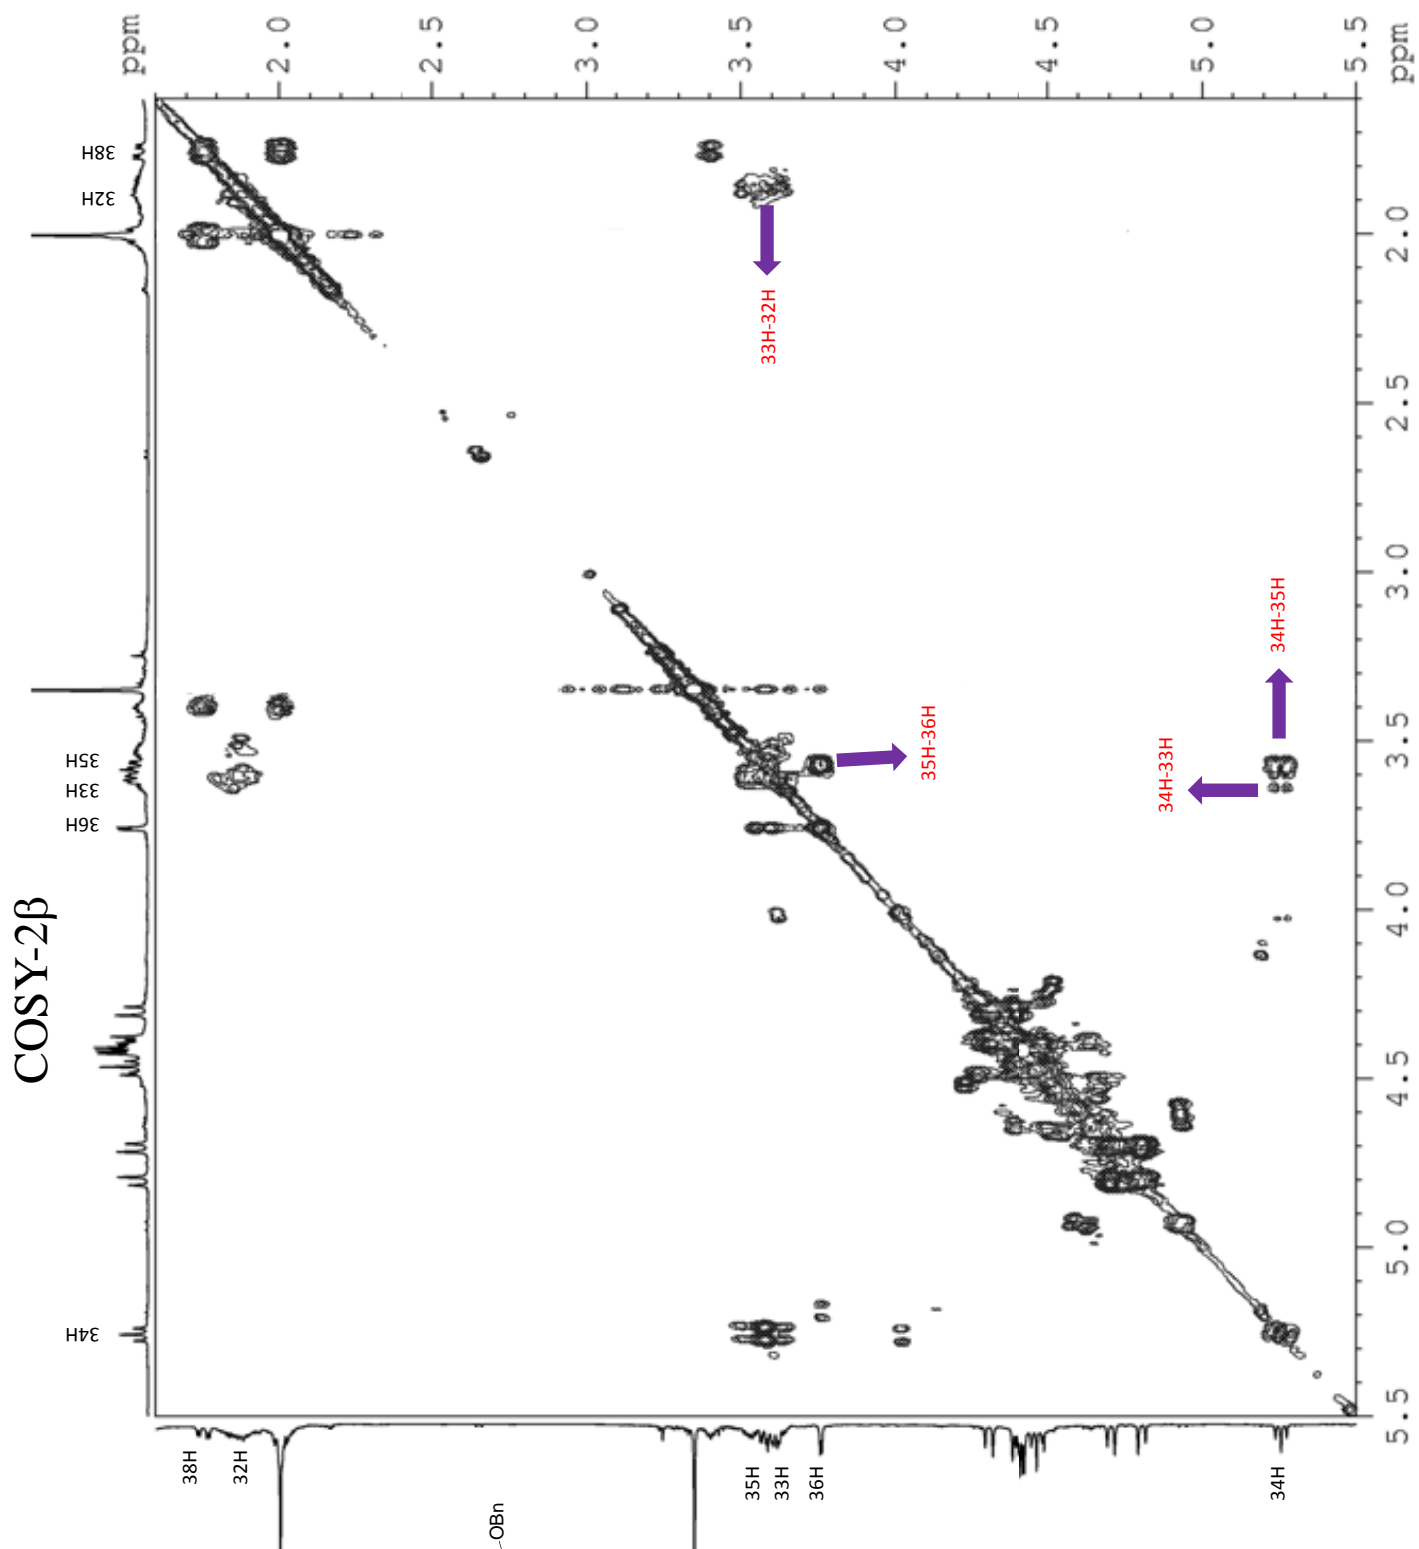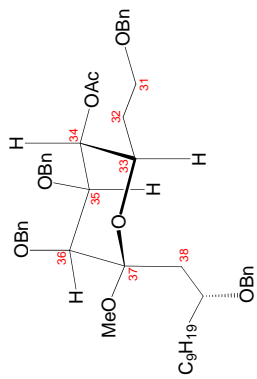

# NOESY-2 $\beta$

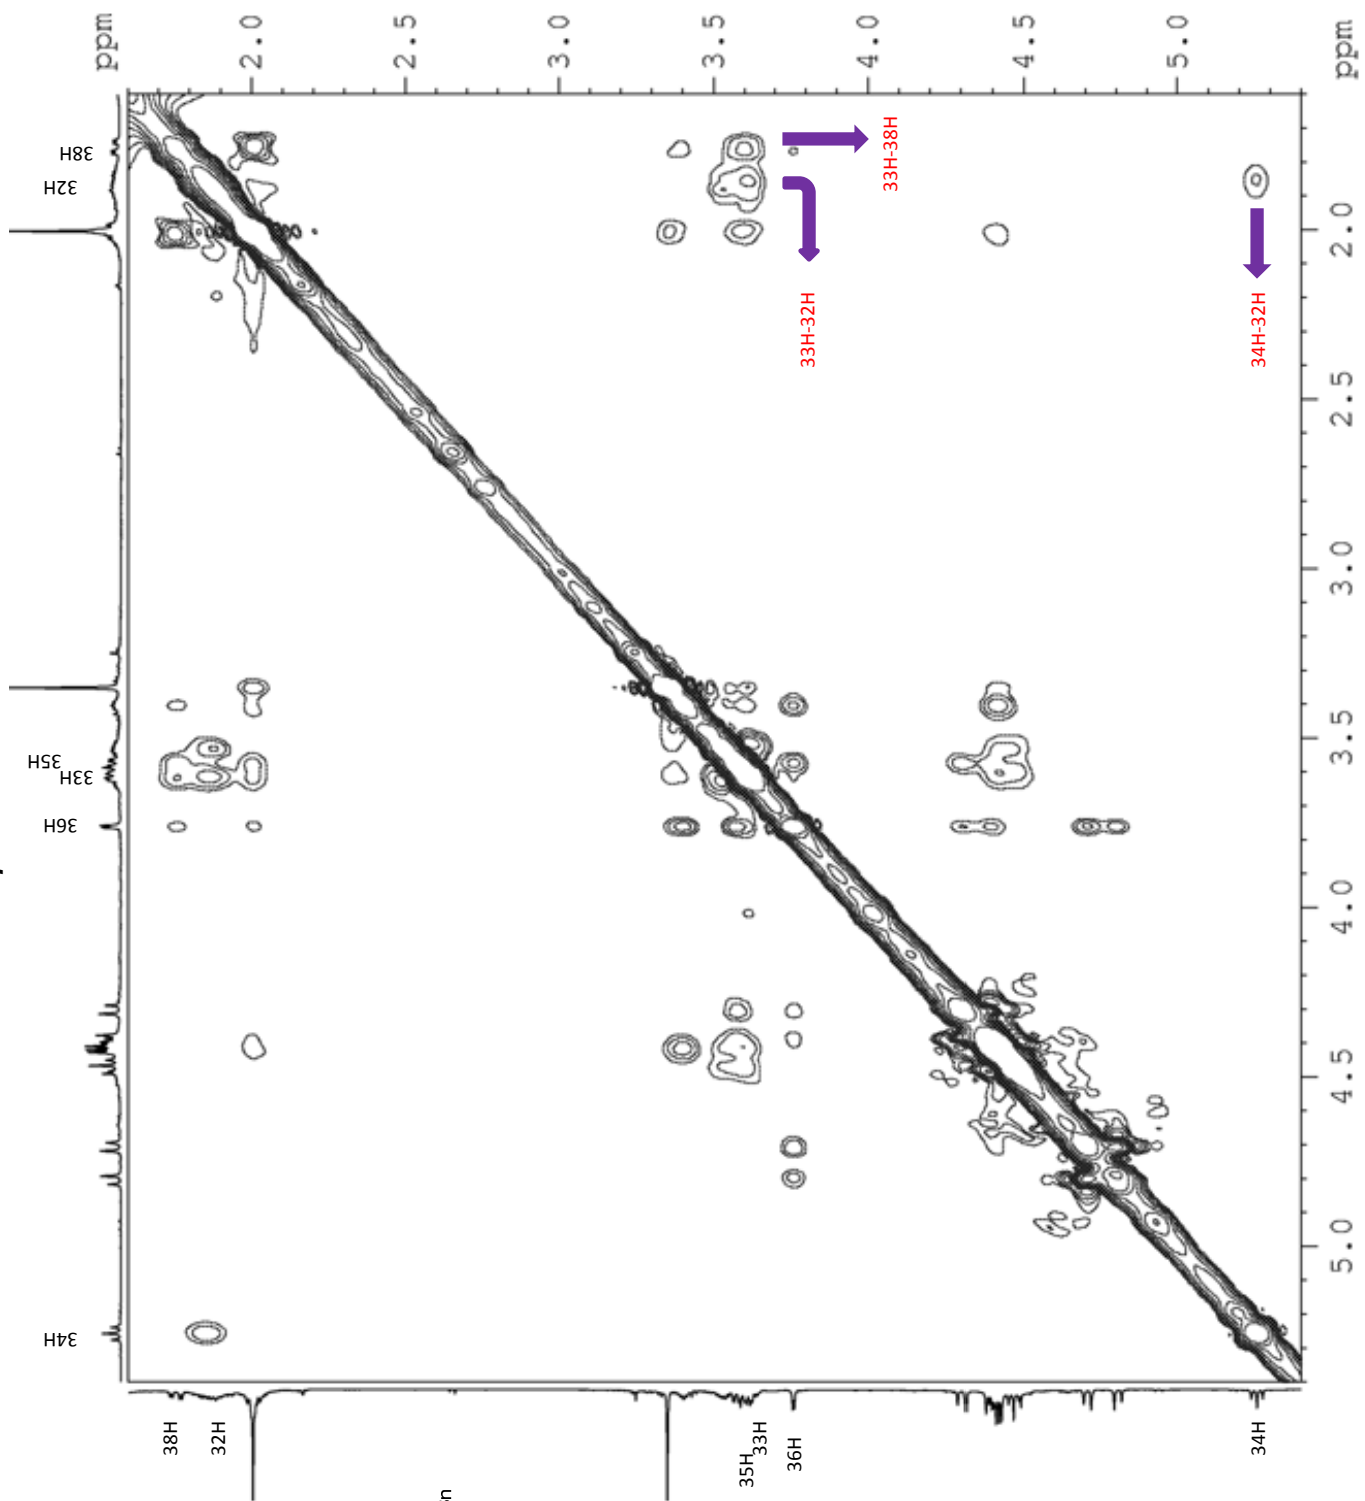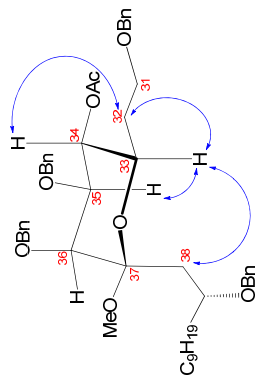

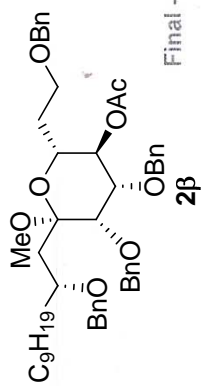

### S<sub>88</sub>(B-I) Spectrum Report

Final - Shots 400 - HNG GROUP; Label G4

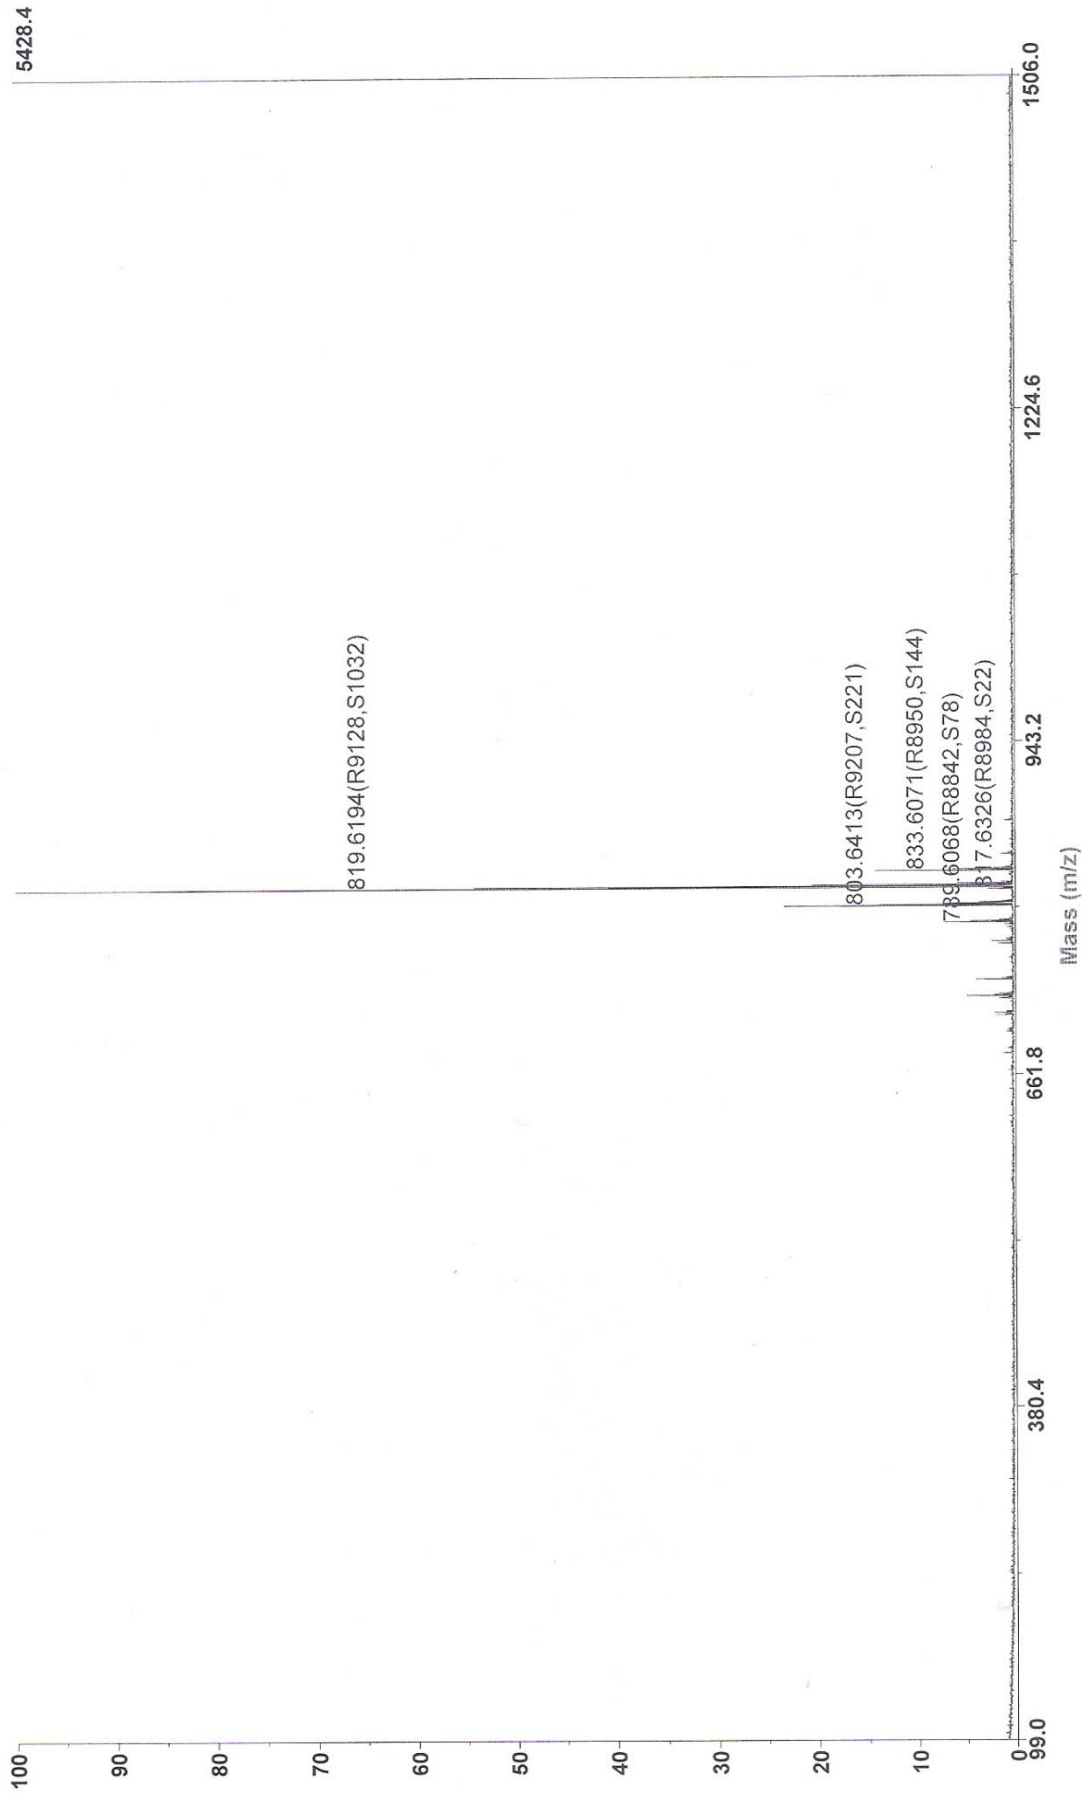

S136



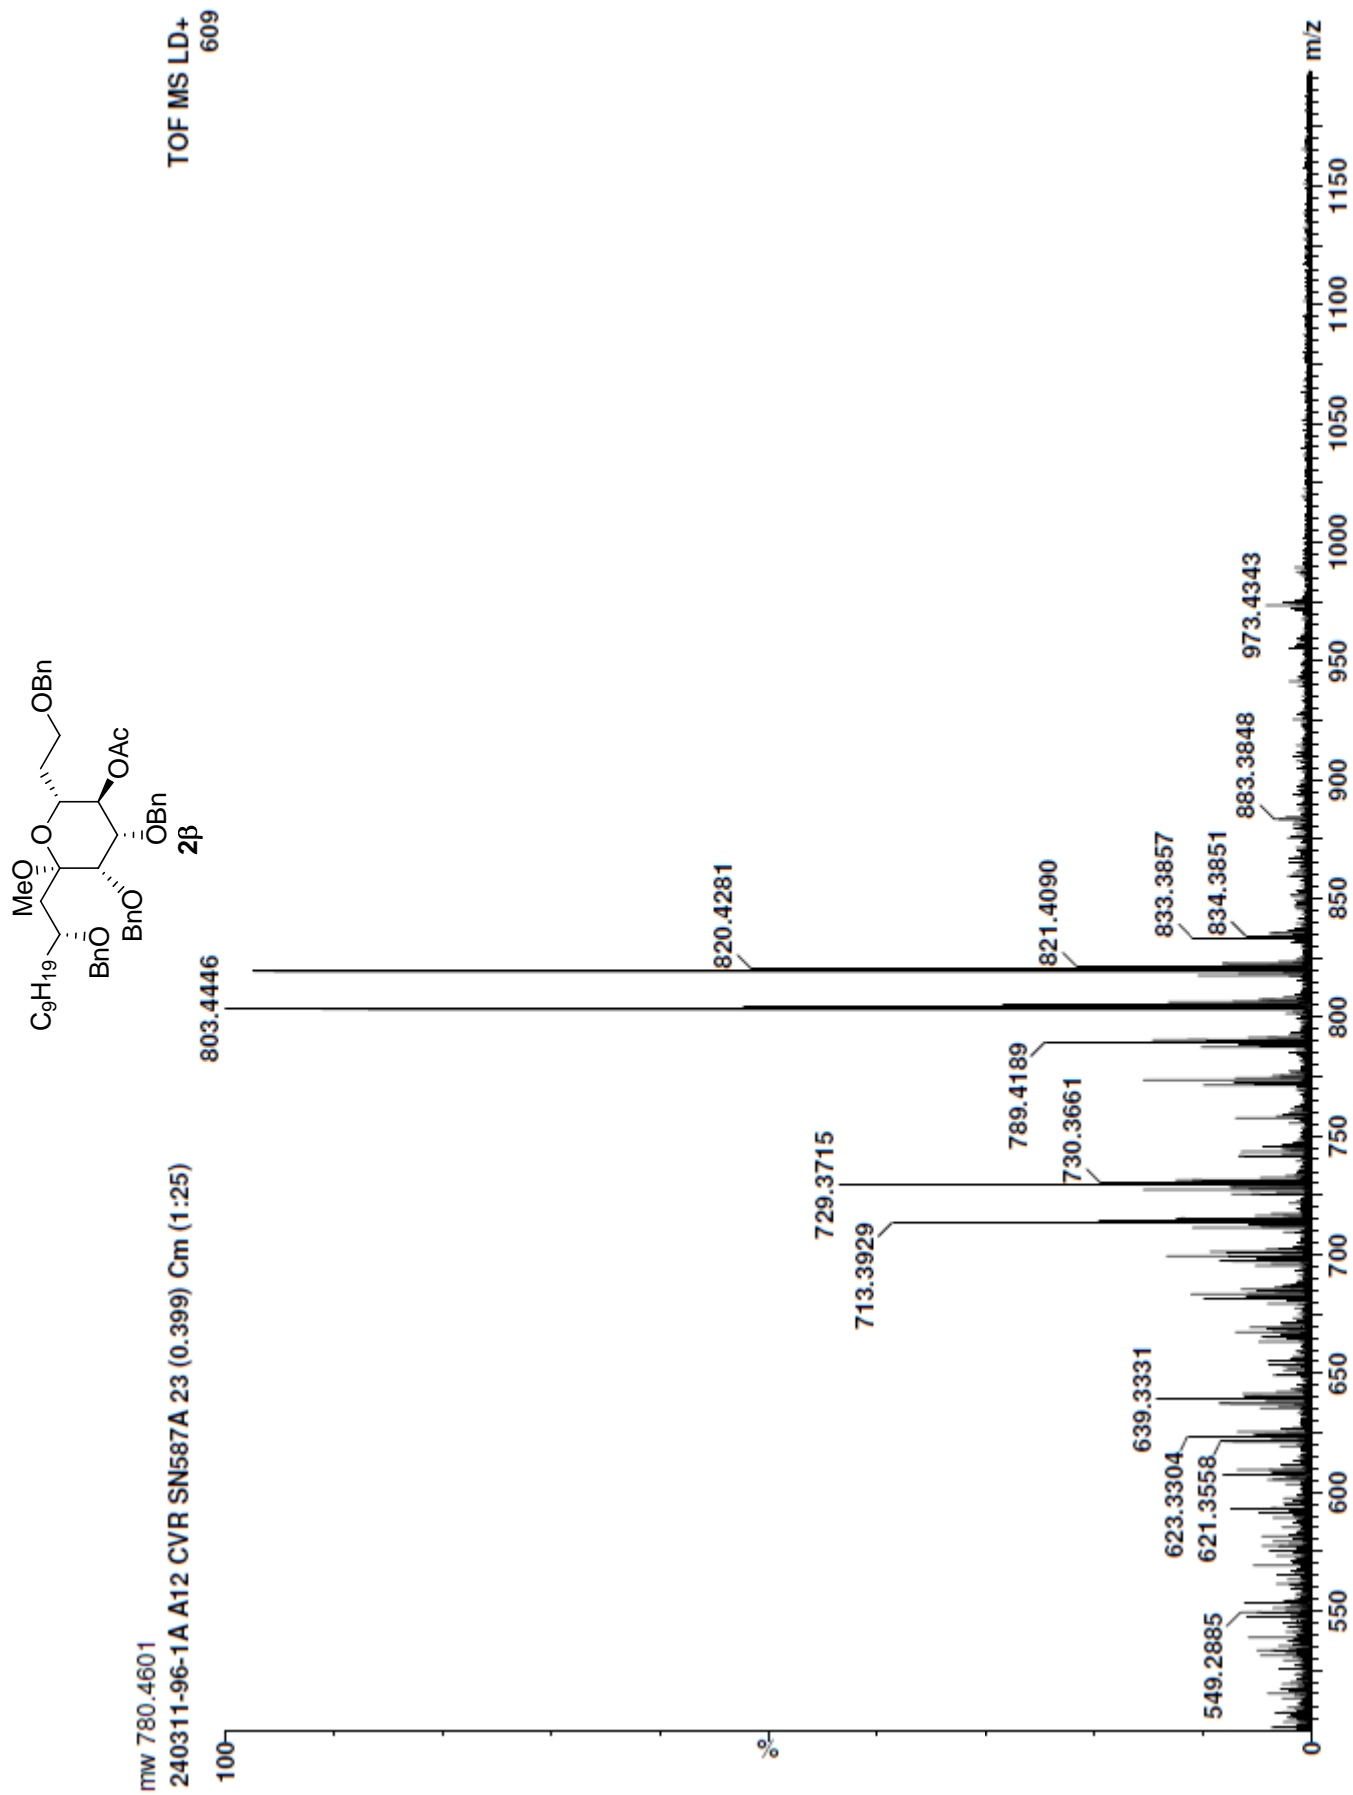

Supplement: c1ob05251a.pdf [file c1ob05251a.pdf]
